# Supplementary material for: Unmet clinical needs in women with polycystic ovary syndrome in regard to mental health: a cross-sectional study
Source: Springer Nature journal article supplement (doi:10.1007/s00404-024-07452-y), 2024-03-11

1    **Archives of Women's Mental Health**

2    **Unmet clinical needs in women with polycystic ovary syndrome in regard to mental health**  
3    **– a cross-sectional study**

4    Sourouni Marina, M. D, Estermann Julia, M. D., Bitterlich Norman, Ph. D, Weidlinger Susanna,  
5    M. D., Bachmann Annette, M. D., Stute Petra, M.D.

6

7    Corresponding author:

8    Professor Dr. med. Petra Stute, M. D.

9    Department of Obstetrics and Gynaecology

10    University Hospital Inselspital

11    Friedbuehlstrasse 19, 3010 Bern, Switzerland

12    E-mail: [petra.stute@insel.ch](mailto:petra.stute@insel.ch)

13    Telephone: (00)41-31-632-1303

14    Fax: (00)41-31-632-1305

15    ORCID:0000-0002-5591-1552

# PCOS

**Polyzystisches Ovarialsyndrom**

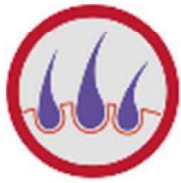

**übermäßige  
Körperbehaarung**

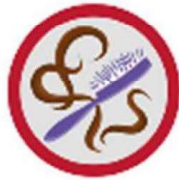

**Haarausfall**

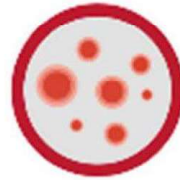

**Akne**

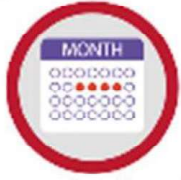

**unregelmässige  
Menstruation**

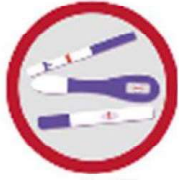

**unerfüllter  
Kinderwunsch**

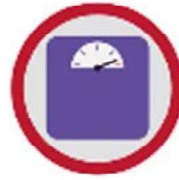

**Übergewicht**

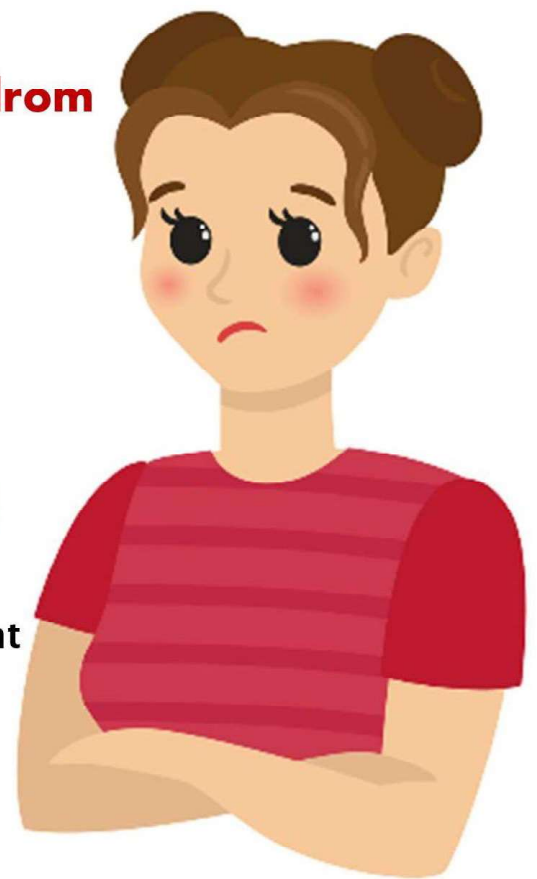

***Treffen diese Symptome auf Sie zu oder  
ist bei Ihnen PCOS bekannt?***

***Dann sind Sie hier genau richtig!***

## STUDIEN-TEILNEHMERINNEN FÜR ONLINE-UMFRAGE GESUCHT

Wir möchten wissen, wie gut Frauen mit PCOS von Ihren Frauenärzten/innen betreut werden. Dazu ist IHRE Meinung gefragt! Auch Frauen die sich von den Symptomen angesprochen fühlen, aber noch keine Diagnose erhalten haben, werden gesucht!

Sie leisten einen wichtigen Beitrag zur Verbesserung der Betreuung und haben die Möglichkeit, eine Auswertung der Daten zu erhalten.

Die Umfrage dauert ca. 15-20 Minuten. Alle Daten werden anonym erfasst.

[https://is.gd/pcos\\_study](https://is.gd/pcos_study)

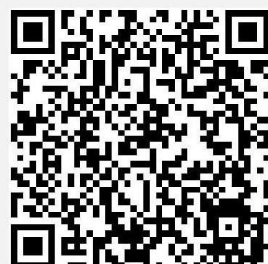

Supplement: MOESM4 [file 26839958]
