# Supplementary material for: Unmet clinical needs in women with polycystic ovary syndrome in regard to mental health: a cross-sectional study
Source: Springer Nature journal article supplement (doi:10.1007/s00404-024-07452-y), 2024-03-11
Supplement: MOESM1 [file 26839958]

1 **Archives of Women's Mental Health**

2 **Unmet clinical needs in women with polycystic ovary syndrome in regard to mental health**  
3 **– a cross-sectional study**

4 Sourouni Marina, M. D, Estermann Julia, M. D., Bitterlich Norman, Ph. D, Weidlinger Susanna,  
5 M. D., Bachmann Annette, M. D., Stute Petra, M.D.

6

7 Corresponding author:

8 Professor Dr. med. Petra Stute, M. D.

9 Department of Obstetrics and Gynaecology

10 University Hospital Inselspital

11 Friedbuehlstrasse 19, 3010 Bern, Switzerland

12 E-mail: [petra.stute@insel.ch](mailto:petra.stute@insel.ch)

13 Telephone: (00)41-31-632-1303

14 Fax: (00)41-31-632-1305

15 ORCID:0000-0002-5591-1552

| #                                                                 | Variable / Field Name  | Field Label<br><i>Field Note</i>                                                                                                                                                                                                                                                                                                                                                                                                                                                                                                                                                                                                                                                                                                                                                                                                                                                                                                                                                                                                                                                                                                                                                                                                                                                                                                                                                                                                                                                                                                                                                                                                                                                                                                                                                                                                                                                                                                                                                                                                                                                                                                                                       | Field Attributes (Field Type, Validation, Choices, Calculations, etc.)                                                                                     |   |            |   |            |   |          |
|-------------------------------------------------------------------|------------------------|------------------------------------------------------------------------------------------------------------------------------------------------------------------------------------------------------------------------------------------------------------------------------------------------------------------------------------------------------------------------------------------------------------------------------------------------------------------------------------------------------------------------------------------------------------------------------------------------------------------------------------------------------------------------------------------------------------------------------------------------------------------------------------------------------------------------------------------------------------------------------------------------------------------------------------------------------------------------------------------------------------------------------------------------------------------------------------------------------------------------------------------------------------------------------------------------------------------------------------------------------------------------------------------------------------------------------------------------------------------------------------------------------------------------------------------------------------------------------------------------------------------------------------------------------------------------------------------------------------------------------------------------------------------------------------------------------------------------------------------------------------------------------------------------------------------------------------------------------------------------------------------------------------------------------------------------------------------------------------------------------------------------------------------------------------------------------------------------------------------------------------------------------------------------|------------------------------------------------------------------------------------------------------------------------------------------------------------|---|------------|---|------------|---|----------|
| Instrument: <b>consent</b> (einverstndnis)      Enabled as survey |                        |                                                                                                                                                                                                                                                                                                                                                                                                                                                                                                                                                                                                                                                                                                                                                                                                                                                                                                                                                                                                                                                                                                                                                                                                                                                                                                                                                                                                                                                                                                                                                                                                                                                                                                                                                                                                                                                                                                                                                                                                                                                                                                                                                                        |                                                                                                                                                            |   |            |   |            |   |          |
| 1                                                                 | record_id              | Record ID                                                                                                                                                                                                                                                                                                                                                                                                                                                                                                                                                                                                                                                                                                                                                                                                                                                                                                                                                                                                                                                                                                                                                                                                                                                                                                                                                                                                                                                                                                                                                                                                                                                                                                                                                                                                                                                                                                                                                                                                                                                                                                                                                              | text                                                                                                                                                       |   |            |   |            |   |          |
| 2                                                                 | info0                  | Welcome to this survey! Please read all information provided below carefully and give your consent to start the questionnaire.                                                                                                                                                                                                                                                                                                                                                                                                                                                                                                                                                                                                                                                                                                                                                                                                                                                                                                                                                                                                                                                                                                                                                                                                                                                                                                                                                                                                                                                                                                                                                                                                                                                                                                                                                                                                                                                                                                                                                                                                                                         | descriptive                                                                                                                                                |   |            |   |            |   |          |
| 3                                                                 | info1                  | <p><b>What is PCOS?</b> Polycystic ovary syndrome (PCOS) is the most common endocrine disorder in women of reproductive age. Typical symptoms include irregular to no menstrual bleedings and signs of hyperandrogenism such as hair loss, excess hair growth and acne.</p> <p><b>Why this study?</b> The aim of this study is to assess implementation of new guidelines for management of PCOS by gynecologists. We are also interested in the areas in which women with PCOS would like additional care. To achieve this we need your honest opinion.</p> <p><b>Participation Criteria:</b> All German-speaking women with PCOS who are of full age and have not yet reached menopause can participate in this study. If you have not yet been diagnosed with PCOS, but suspect from your symptoms that you may be affected, you are also welcome to participate. If you do not meet inclusion criteria, this will be indicated in the first part of the survey and the survey will be closed.</p> <p><b>What do you get out of it?</b> You make an important contribution to improving the care situation for women with PCOS. If you are interested in the results of this study, you will be informed how to subscribe for it at the end of the survey.</p> <p><b>Ethical approval and anonymity:</b> This study has been deemed safe by the relevant ethical committees. There are questions about your health, but no personal, identifiable data will be collected. The data are therefore collected anonymously. This means that your answers can not be traced back to you. Thus, in the first section you are instructed to create a personal code. This ensures that each person participates in the survey only once.</p> <p><b>Important information:</b> The survey takes about 15-20 minutes to complete. You can cancel participation at any time and without giving reasons. We would like to point out that we can only use fully completed surveys for the study. Please read the questions carefully and answer them as correctly as possible. Below the answer field you will find helpful extra information or instructions in some cases.</p> | descriptive                                                                                                                                                |   |            |   |            |   |          |
| 4                                                                 | info2                  | If you agree please select „yes“ and the survey can begin. Thank you very much for your participation!                                                                                                                                                                                                                                                                                                                                                                                                                                                                                                                                                                                                                                                                                                                                                                                                                                                                                                                                                                                                                                                                                                                                                                                                                                                                                                                                                                                                                                                                                                                                                                                                                                                                                                                                                                                                                                                                                                                                                                                                                                                                 | descriptive                                                                                                                                                |   |            |   |            |   |          |
| 5                                                                 | agree                  | Do you give your consent to take part in this study?                                                                                                                                                                                                                                                                                                                                                                                                                                                                                                                                                                                                                                                                                                                                                                                                                                                                                                                                                                                                                                                                                                                                                                                                                                                                                                                                                                                                                                                                                                                                                                                                                                                                                                                                                                                                                                                                                                                                                                                                                                                                                                                   | radio, Required<br><table border="1"> <tr><td>1</td><td>Yes</td></tr> <tr><td>0</td><td>No</td></tr> </table>                                              | 1 | Yes        | 0 | No         |   |          |
| 1                                                                 | Yes                    |                                                                                                                                                                                                                                                                                                                                                                                                                                                                                                                                                                                                                                                                                                                                                                                                                                                                                                                                                                                                                                                                                                                                                                                                                                                                                                                                                                                                                                                                                                                                                                                                                                                                                                                                                                                                                                                                                                                                                                                                                                                                                                                                                                        |                                                                                                                                                            |   |            |   |            |   |          |
| 0                                                                 | No                     |                                                                                                                                                                                                                                                                                                                                                                                                                                                                                                                                                                                                                                                                                                                                                                                                                                                                                                                                                                                                                                                                                                                                                                                                                                                                                                                                                                                                                                                                                                                                                                                                                                                                                                                                                                                                                                                                                                                                                                                                                                                                                                                                                                        |                                                                                                                                                            |   |            |   |            |   |          |
| 6                                                                 | info_submit            | Please always select "Submit", to get to the next page.                                                                                                                                                                                                                                                                                                                                                                                                                                                                                                                                                                                                                                                                                                                                                                                                                                                                                                                                                                                                                                                                                                                                                                                                                                                                                                                                                                                                                                                                                                                                                                                                                                                                                                                                                                                                                                                                                                                                                                                                                                                                                                                | descriptive                                                                                                                                                |   |            |   |            |   |          |
| 7                                                                 | einverstndnis_complete | Section Header: <i>Form Status</i><br>Complete?                                                                                                                                                                                                                                                                                                                                                                                                                                                                                                                                                                                                                                                                                                                                                                                                                                                                                                                                                                                                                                                                                                                                                                                                                                                                                                                                                                                                                                                                                                                                                                                                                                                                                                                                                                                                                                                                                                                                                                                                                                                                                                                        | dropdown<br><table border="1"> <tr><td>0</td><td>Incomplete</td></tr> <tr><td>1</td><td>Unverified</td></tr> <tr><td>2</td><td>Complete</td></tr> </table> | 0 | Incomplete | 1 | Unverified | 2 | Complete |
| 0                                                                 | Incomplete             |                                                                                                                                                                                                                                                                                                                                                                                                                                                                                                                                                                                                                                                                                                                                                                                                                                                                                                                                                                                                                                                                                                                                                                                                                                                                                                                                                                                                                                                                                                                                                                                                                                                                                                                                                                                                                                                                                                                                                                                                                                                                                                                                                                        |                                                                                                                                                            |   |            |   |            |   |          |
| 1                                                                 | Unverified             |                                                                                                                                                                                                                                                                                                                                                                                                                                                                                                                                                                                                                                                                                                                                                                                                                                                                                                                                                                                                                                                                                                                                                                                                                                                                                                                                                                                                                                                                                                                                                                                                                                                                                                                                                                                                                                                                                                                                                                                                                                                                                                                                                                        |                                                                                                                                                            |   |            |   |            |   |          |
| 2                                                                 | Complete               |                                                                                                                                                                                                                                                                                                                                                                                                                                                                                                                                                                                                                                                                                                                                                                                                                                                                                                                                                                                                                                                                                                                                                                                                                                                                                                                                                                                                                                                                                                                                                                                                                                                                                                                                                                                                                                                                                                                                                                                                                                                                                                                                                                        |                                                                                                                                                            |   |            |   |            |   |          |

|    |                                                                                                                                                                                                                                                           |                                                                                                                                                                                                                                                                                                                                                                                                                                                                                                                                                                                                                                                                                                                                  |                                                                                                                                                                                                                                                                                                                                                                                                                      |   |             |   |         |    |         |    |       |   |   |   |   |   |   |   |   |   |   |   |   |    |    |    |              |
|----|-----------------------------------------------------------------------------------------------------------------------------------------------------------------------------------------------------------------------------------------------------------|----------------------------------------------------------------------------------------------------------------------------------------------------------------------------------------------------------------------------------------------------------------------------------------------------------------------------------------------------------------------------------------------------------------------------------------------------------------------------------------------------------------------------------------------------------------------------------------------------------------------------------------------------------------------------------------------------------------------------------|----------------------------------------------------------------------------------------------------------------------------------------------------------------------------------------------------------------------------------------------------------------------------------------------------------------------------------------------------------------------------------------------------------------------|---|-------------|---|---------|----|---------|----|-------|---|---|---|---|---|---|---|---|---|---|---|---|----|----|----|--------------|
| 8  | participant_id                                                                                                                                                                                                                                            | <p>Section Header: <i>Personal-ID</i></p> <p>Section Header: Teilnehmer-ID</p> <p>Please create your personal identification code in CAPITAL LETTERS out of following information:</p> <ul style="list-style-type: none"> <li>-first and last letter of your mother's first name</li> <li>-first and last letter of your father's first name</li> <li>-first and last letter of your first name</li> <li>-last two digits of your birth year</li> </ul> <p>You can find an example below the answer field. If you can not give one of the details (e.g. you do not know the name of a parent) write «XX» in the correspondent position.</p> <p><i>E.g.: AETNMA76 (mother Anne, father Thorsten, you Michaela, born 1976)</i></p> | text, Required                                                                                                                                                                                                                                                                                                                                                                                                       |   |             |   |         |    |         |    |       |   |   |   |   |   |   |   |   |   |   |   |   |    |    |    |              |
| 9  | info_continuation                                                                                                                                                                                                                                         | To continue later: You can pause the survey at any time and resume it later. To do so, select „Safe & Return Later“. You will then receive a code, which you can use to continue the survey at the same point. Your answers will be saved.                                                                                                                                                                                                                                                                                                                                                                                                                                                                                       | descriptive                                                                                                                                                                                                                                                                                                                                                                                                          |   |             |   |         |    |         |    |       |   |   |   |   |   |   |   |   |   |   |   |   |    |    |    |              |
| 10 | sex                                                                                                                                                                                                                                                       | <p>Section Header: <i>characteristics</i></p> <p>sex</p>                                                                                                                                                                                                                                                                                                                                                                                                                                                                                                                                                                                                                                                                         | <p>radio, Required</p> <table border="1"> <tr><td>1</td><td>female</td></tr> <tr><td>2</td><td>male</td></tr> <tr><td>88</td><td>other</td></tr> </table>                                                                                                                                                                                                                                                            | 1 | female      | 2 | male    | 88 | other   |    |       |   |   |   |   |   |   |   |   |   |   |   |   |    |    |    |              |
| 1  | female                                                                                                                                                                                                                                                    |                                                                                                                                                                                                                                                                                                                                                                                                                                                                                                                                                                                                                                                                                                                                  |                                                                                                                                                                                                                                                                                                                                                                                                                      |   |             |   |         |    |         |    |       |   |   |   |   |   |   |   |   |   |   |   |   |    |    |    |              |
| 2  | male                                                                                                                                                                                                                                                      |                                                                                                                                                                                                                                                                                                                                                                                                                                                                                                                                                                                                                                                                                                                                  |                                                                                                                                                                                                                                                                                                                                                                                                                      |   |             |   |         |    |         |    |       |   |   |   |   |   |   |   |   |   |   |   |   |    |    |    |              |
| 88 | other                                                                                                                                                                                                                                                     |                                                                                                                                                                                                                                                                                                                                                                                                                                                                                                                                                                                                                                                                                                                                  |                                                                                                                                                                                                                                                                                                                                                                                                                      |   |             |   |         |    |         |    |       |   |   |   |   |   |   |   |   |   |   |   |   |    |    |    |              |
| 11 | sex_88                                                                                                                                                                                                                                                    | sex - other                                                                                                                                                                                                                                                                                                                                                                                                                                                                                                                                                                                                                                                                                                                      | notes, Required                                                                                                                                                                                                                                                                                                                                                                                                      |   |             |   |         |    |         |    |       |   |   |   |   |   |   |   |   |   |   |   |   |    |    |    |              |
|    | Show the field ONLY if: [sex] = '88'                                                                                                                                                                                                                      | <i>Please specify.</i>                                                                                                                                                                                                                                                                                                                                                                                                                                                                                                                                                                                                                                                                                                           |                                                                                                                                                                                                                                                                                                                                                                                                                      |   |             |   |         |    |         |    |       |   |   |   |   |   |   |   |   |   |   |   |   |    |    |    |              |
| 12 | excluded_1                                                                                                                                                                                                                                                | Unfortunately, you do not fulfill required criteria for this study. Nevertheless, we thank you for your willingness and wish you all the best. Please select «submit». Afterwards you can close the window.                                                                                                                                                                                                                                                                                                                                                                                                                                                                                                                      | descriptive                                                                                                                                                                                                                                                                                                                                                                                                          |   |             |   |         |    |         |    |       |   |   |   |   |   |   |   |   |   |   |   |   |    |    |    |              |
|    | Show the field ONLY if: [sex] = '2' or [sex] = '88'                                                                                                                                                                                                       |                                                                                                                                                                                                                                                                                                                                                                                                                                                                                                                                                                                                                                                                                                                                  |                                                                                                                                                                                                                                                                                                                                                                                                                      |   |             |   |         |    |         |    |       |   |   |   |   |   |   |   |   |   |   |   |   |    |    |    |              |
| 13 | age                                                                                                                                                                                                                                                       | age                                                                                                                                                                                                                                                                                                                                                                                                                                                                                                                                                                                                                                                                                                                              | text (integer, Min: 1, Max: 110), Required                                                                                                                                                                                                                                                                                                                                                                           |   |             |   |         |    |         |    |       |   |   |   |   |   |   |   |   |   |   |   |   |    |    |    |              |
|    | Show the field ONLY if: [sex] = '1'                                                                                                                                                                                                                       |                                                                                                                                                                                                                                                                                                                                                                                                                                                                                                                                                                                                                                                                                                                                  |                                                                                                                                                                                                                                                                                                                                                                                                                      |   |             |   |         |    |         |    |       |   |   |   |   |   |   |   |   |   |   |   |   |    |    |    |              |
| 14 | excluded_2                                                                                                                                                                                                                                                | Unfortunately, you do not fulfill required criteria for this study. Nevertheless, we thank you for your willingness and wish you all the best. Please select «submit». Afterwards you can close the window.                                                                                                                                                                                                                                                                                                                                                                                                                                                                                                                      | descriptive                                                                                                                                                                                                                                                                                                                                                                                                          |   |             |   |         |    |         |    |       |   |   |   |   |   |   |   |   |   |   |   |   |    |    |    |              |
|    | Show the field ONLY if: [age] = 1 or [age] = 2 or [age] = 3 or [age] = 4 or [age] = 5 or [age] = 6 or [age] = 7 or [age] = 8 or [age] = 9 or [age] = 10 or [age] = 11 or [age] = 12 or [age] = 13 or [age] = 14 or [age] = 15 or [age] = 16 or [age] = 17 |                                                                                                                                                                                                                                                                                                                                                                                                                                                                                                                                                                                                                                                                                                                                  |                                                                                                                                                                                                                                                                                                                                                                                                                      |   |             |   |         |    |         |    |       |   |   |   |   |   |   |   |   |   |   |   |   |    |    |    |              |
| 15 | height                                                                                                                                                                                                                                                    | height [cm]                                                                                                                                                                                                                                                                                                                                                                                                                                                                                                                                                                                                                                                                                                                      | text (integer, Min: 50, Max: 250), Required                                                                                                                                                                                                                                                                                                                                                                          |   |             |   |         |    |         |    |       |   |   |   |   |   |   |   |   |   |   |   |   |    |    |    |              |
|    | Show the field ONLY if: [sex] = '1' and [age] >= 18                                                                                                                                                                                                       | <i>e.g.: 165</i>                                                                                                                                                                                                                                                                                                                                                                                                                                                                                                                                                                                                                                                                                                                 |                                                                                                                                                                                                                                                                                                                                                                                                                      |   |             |   |         |    |         |    |       |   |   |   |   |   |   |   |   |   |   |   |   |    |    |    |              |
| 16 | weight                                                                                                                                                                                                                                                    | weight [kg]                                                                                                                                                                                                                                                                                                                                                                                                                                                                                                                                                                                                                                                                                                                      | text (integer, Min: 30, Max: 300), Required                                                                                                                                                                                                                                                                                                                                                                          |   |             |   |         |    |         |    |       |   |   |   |   |   |   |   |   |   |   |   |   |    |    |    |              |
|    | Show the field ONLY if: [sex] = '1' and [age] >= 18                                                                                                                                                                                                       | <i>e.g.: 80</i>                                                                                                                                                                                                                                                                                                                                                                                                                                                                                                                                                                                                                                                                                                                  |                                                                                                                                                                                                                                                                                                                                                                                                                      |   |             |   |         |    |         |    |       |   |   |   |   |   |   |   |   |   |   |   |   |    |    |    |              |
| 17 | bmi                                                                                                                                                                                                                                                       | BMI                                                                                                                                                                                                                                                                                                                                                                                                                                                                                                                                                                                                                                                                                                                              | calc, Required                                                                                                                                                                                                                                                                                                                                                                                                       |   |             |   |         |    |         |    |       |   |   |   |   |   |   |   |   |   |   |   |   |    |    |    |              |
|    | Show the field ONLY if: [sex] = '1' and [age] >= 18                                                                                                                                                                                                       | <i>Calculated automatically.</i>                                                                                                                                                                                                                                                                                                                                                                                                                                                                                                                                                                                                                                                                                                 | Calculation: $[\text{weight}] * 10000 / ([\text{height}]^2)$                                                                                                                                                                                                                                                                                                                                                         |   |             |   |         |    |         |    |       |   |   |   |   |   |   |   |   |   |   |   |   |    |    |    |              |
| 18 | domicile                                                                                                                                                                                                                                                  | residence                                                                                                                                                                                                                                                                                                                                                                                                                                                                                                                                                                                                                                                                                                                        | radio, Required                                                                                                                                                                                                                                                                                                                                                                                                      |   |             |   |         |    |         |    |       |   |   |   |   |   |   |   |   |   |   |   |   |    |    |    |              |
|    | Show the field ONLY if: [sex] = '1' and [age] >= 18                                                                                                                                                                                                       | <i>In which country do you live?</i>                                                                                                                                                                                                                                                                                                                                                                                                                                                                                                                                                                                                                                                                                             | <table border="1"> <tr><td>1</td><td>Switzerland</td></tr> <tr><td>2</td><td>Germany</td></tr> <tr><td>3</td><td>Austria</td></tr> <tr><td>88</td><td>other</td></tr> </table>                                                                                                                                                                                                                                       | 1 | Switzerland | 2 | Germany | 3  | Austria | 88 | other |   |   |   |   |   |   |   |   |   |   |   |   |    |    |    |              |
| 1  | Switzerland                                                                                                                                                                                                                                               |                                                                                                                                                                                                                                                                                                                                                                                                                                                                                                                                                                                                                                                                                                                                  |                                                                                                                                                                                                                                                                                                                                                                                                                      |   |             |   |         |    |         |    |       |   |   |   |   |   |   |   |   |   |   |   |   |    |    |    |              |
| 2  | Germany                                                                                                                                                                                                                                                   |                                                                                                                                                                                                                                                                                                                                                                                                                                                                                                                                                                                                                                                                                                                                  |                                                                                                                                                                                                                                                                                                                                                                                                                      |   |             |   |         |    |         |    |       |   |   |   |   |   |   |   |   |   |   |   |   |    |    |    |              |
| 3  | Austria                                                                                                                                                                                                                                                   |                                                                                                                                                                                                                                                                                                                                                                                                                                                                                                                                                                                                                                                                                                                                  |                                                                                                                                                                                                                                                                                                                                                                                                                      |   |             |   |         |    |         |    |       |   |   |   |   |   |   |   |   |   |   |   |   |    |    |    |              |
| 88 | other                                                                                                                                                                                                                                                     |                                                                                                                                                                                                                                                                                                                                                                                                                                                                                                                                                                                                                                                                                                                                  |                                                                                                                                                                                                                                                                                                                                                                                                                      |   |             |   |         |    |         |    |       |   |   |   |   |   |   |   |   |   |   |   |   |    |    |    |              |
| 19 | domicile_88                                                                                                                                                                                                                                               | residence - other                                                                                                                                                                                                                                                                                                                                                                                                                                                                                                                                                                                                                                                                                                                | text, Required                                                                                                                                                                                                                                                                                                                                                                                                       |   |             |   |         |    |         |    |       |   |   |   |   |   |   |   |   |   |   |   |   |    |    |    |              |
|    | Show the field ONLY if: [domicile] = '88'                                                                                                                                                                                                                 | <i>Please specify.</i>                                                                                                                                                                                                                                                                                                                                                                                                                                                                                                                                                                                                                                                                                                           |                                                                                                                                                                                                                                                                                                                                                                                                                      |   |             |   |         |    |         |    |       |   |   |   |   |   |   |   |   |   |   |   |   |    |    |    |              |
| 20 | children_nr                                                                                                                                                                                                                                               | Number of children                                                                                                                                                                                                                                                                                                                                                                                                                                                                                                                                                                                                                                                                                                               | dropdown, Required                                                                                                                                                                                                                                                                                                                                                                                                   |   |             |   |         |    |         |    |       |   |   |   |   |   |   |   |   |   |   |   |   |    |    |    |              |
|    | Show the field ONLY if: [sex] = '1' and [age] >= 18                                                                                                                                                                                                       |                                                                                                                                                                                                                                                                                                                                                                                                                                                                                                                                                                                                                                                                                                                                  | <table border="1"> <tr><td>0</td><td>none</td></tr> <tr><td>1</td><td>1</td></tr> <tr><td>2</td><td>2</td></tr> <tr><td>3</td><td>3</td></tr> <tr><td>4</td><td>4</td></tr> <tr><td>5</td><td>5</td></tr> <tr><td>6</td><td>6</td></tr> <tr><td>7</td><td>7</td></tr> <tr><td>8</td><td>8</td></tr> <tr><td>9</td><td>9</td></tr> <tr><td>10</td><td>10</td></tr> <tr><td>11</td><td>more than 10</td></tr> </table> | 0 | none        | 1 | 1       | 2  | 2       | 3  | 3     | 4 | 4 | 5 | 5 | 6 | 6 | 7 | 7 | 8 | 8 | 9 | 9 | 10 | 10 | 11 | more than 10 |
| 0  | none                                                                                                                                                                                                                                                      |                                                                                                                                                                                                                                                                                                                                                                                                                                                                                                                                                                                                                                                                                                                                  |                                                                                                                                                                                                                                                                                                                                                                                                                      |   |             |   |         |    |         |    |       |   |   |   |   |   |   |   |   |   |   |   |   |    |    |    |              |
| 1  | 1                                                                                                                                                                                                                                                         |                                                                                                                                                                                                                                                                                                                                                                                                                                                                                                                                                                                                                                                                                                                                  |                                                                                                                                                                                                                                                                                                                                                                                                                      |   |             |   |         |    |         |    |       |   |   |   |   |   |   |   |   |   |   |   |   |    |    |    |              |
| 2  | 2                                                                                                                                                                                                                                                         |                                                                                                                                                                                                                                                                                                                                                                                                                                                                                                                                                                                                                                                                                                                                  |                                                                                                                                                                                                                                                                                                                                                                                                                      |   |             |   |         |    |         |    |       |   |   |   |   |   |   |   |   |   |   |   |   |    |    |    |              |
| 3  | 3                                                                                                                                                                                                                                                         |                                                                                                                                                                                                                                                                                                                                                                                                                                                                                                                                                                                                                                                                                                                                  |                                                                                                                                                                                                                                                                                                                                                                                                                      |   |             |   |         |    |         |    |       |   |   |   |   |   |   |   |   |   |   |   |   |    |    |    |              |
| 4  | 4                                                                                                                                                                                                                                                         |                                                                                                                                                                                                                                                                                                                                                                                                                                                                                                                                                                                                                                                                                                                                  |                                                                                                                                                                                                                                                                                                                                                                                                                      |   |             |   |         |    |         |    |       |   |   |   |   |   |   |   |   |   |   |   |   |    |    |    |              |
| 5  | 5                                                                                                                                                                                                                                                         |                                                                                                                                                                                                                                                                                                                                                                                                                                                                                                                                                                                                                                                                                                                                  |                                                                                                                                                                                                                                                                                                                                                                                                                      |   |             |   |         |    |         |    |       |   |   |   |   |   |   |   |   |   |   |   |   |    |    |    |              |
| 6  | 6                                                                                                                                                                                                                                                         |                                                                                                                                                                                                                                                                                                                                                                                                                                                                                                                                                                                                                                                                                                                                  |                                                                                                                                                                                                                                                                                                                                                                                                                      |   |             |   |         |    |         |    |       |   |   |   |   |   |   |   |   |   |   |   |   |    |    |    |              |
| 7  | 7                                                                                                                                                                                                                                                         |                                                                                                                                                                                                                                                                                                                                                                                                                                                                                                                                                                                                                                                                                                                                  |                                                                                                                                                                                                                                                                                                                                                                                                                      |   |             |   |         |    |         |    |       |   |   |   |   |   |   |   |   |   |   |   |   |    |    |    |              |
| 8  | 8                                                                                                                                                                                                                                                         |                                                                                                                                                                                                                                                                                                                                                                                                                                                                                                                                                                                                                                                                                                                                  |                                                                                                                                                                                                                                                                                                                                                                                                                      |   |             |   |         |    |         |    |       |   |   |   |   |   |   |   |   |   |   |   |   |    |    |    |              |
| 9  | 9                                                                                                                                                                                                                                                         |                                                                                                                                                                                                                                                                                                                                                                                                                                                                                                                                                                                                                                                                                                                                  |                                                                                                                                                                                                                                                                                                                                                                                                                      |   |             |   |         |    |         |    |       |   |   |   |   |   |   |   |   |   |   |   |   |    |    |    |              |
| 10 | 10                                                                                                                                                                                                                                                        |                                                                                                                                                                                                                                                                                                                                                                                                                                                                                                                                                                                                                                                                                                                                  |                                                                                                                                                                                                                                                                                                                                                                                                                      |   |             |   |         |    |         |    |       |   |   |   |   |   |   |   |   |   |   |   |   |    |    |    |              |
| 11 | more than 10                                                                                                                                                                                                                                              |                                                                                                                                                                                                                                                                                                                                                                                                                                                                                                                                                                                                                                                                                                                                  |                                                                                                                                                                                                                                                                                                                                                                                                                      |   |             |   |         |    |         |    |       |   |   |   |   |   |   |   |   |   |   |   |   |    |    |    |              |
| 21 | civil                                                                                                                                                                                                                                                     | Marital status                                                                                                                                                                                                                                                                                                                                                                                                                                                                                                                                                                                                                                                                                                                   | dropdown, Required                                                                                                                                                                                                                                                                                                                                                                                                   |   |             |   |         |    |         |    |       |   |   |   |   |   |   |   |   |   |   |   |   |    |    |    |              |
|    | Show the field ONLY if: [sex] = '1' and [age] >= 18                                                                                                                                                                                                       |                                                                                                                                                                                                                                                                                                                                                                                                                                                                                                                                                                                                                                                                                                                                  | <table border="1"> <tr><td>1</td><td>single</td></tr> <tr><td>2</td><td>married</td></tr> </table>                                                                                                                                                                                                                                                                                                                   | 1 | single      | 2 | married |    |         |    |       |   |   |   |   |   |   |   |   |   |   |   |   |    |    |    |              |
| 1  | single                                                                                                                                                                                                                                                    |                                                                                                                                                                                                                                                                                                                                                                                                                                                                                                                                                                                                                                                                                                                                  |                                                                                                                                                                                                                                                                                                                                                                                                                      |   |             |   |         |    |         |    |       |   |   |   |   |   |   |   |   |   |   |   |   |    |    |    |              |
| 2  | married                                                                                                                                                                                                                                                   |                                                                                                                                                                                                                                                                                                                                                                                                                                                                                                                                                                                                                                                                                                                                  |                                                                                                                                                                                                                                                                                                                                                                                                                      |   |             |   |         |    |         |    |       |   |   |   |   |   |   |   |   |   |   |   |   |    |    |    |              |

|    |                                                                                                                                                |                                                                                                                                                                                                                            |                                                                                                                                                                                                                                                                                                                                                                                                                                                                                                                                                                                                                                                                                            |   |               |                                 |                                                                       |               |                                                                                      |    |                                                                                     |              |                                                                                        |               |                                                                                  |    |               |                   |     |               |               |    |               |            |     |                |       |    |     |    |     |    |     |    |     |    |     |    |     |    |     |
|----|------------------------------------------------------------------------------------------------------------------------------------------------|----------------------------------------------------------------------------------------------------------------------------------------------------------------------------------------------------------------------------|--------------------------------------------------------------------------------------------------------------------------------------------------------------------------------------------------------------------------------------------------------------------------------------------------------------------------------------------------------------------------------------------------------------------------------------------------------------------------------------------------------------------------------------------------------------------------------------------------------------------------------------------------------------------------------------------|---|---------------|---------------------------------|-----------------------------------------------------------------------|---------------|--------------------------------------------------------------------------------------|----|-------------------------------------------------------------------------------------|--------------|----------------------------------------------------------------------------------------|---------------|----------------------------------------------------------------------------------|----|---------------|-------------------|-----|---------------|---------------|----|---------------|------------|-----|----------------|-------|----|-----|----|-----|----|-----|----|-----|----|-----|----|-----|----|-----|
|    |                                                                                                                                                |                                                                                                                                                                                                                            | <table border="1"> <tr><td>3</td><td>civil union</td></tr> <tr><td>4</td><td>widowed</td></tr> <tr><td>5</td><td>divorced</td></tr> <tr><td>88</td><td>other /no answer</td></tr> </table>                                                                                                                                                                                                                                                                                                                                                                                                                                                                                                 | 3 | civil union   | 4                               | widowed                                                               | 5             | divorced                                                                             | 88 | other /no answer                                                                    |              |                                                                                        |               |                                                                                  |    |               |                   |     |               |               |    |               |            |     |                |       |    |     |    |     |    |     |    |     |    |     |    |     |    |     |
| 3  | civil union                                                                                                                                    |                                                                                                                                                                                                                            |                                                                                                                                                                                                                                                                                                                                                                                                                                                                                                                                                                                                                                                                                            |   |               |                                 |                                                                       |               |                                                                                      |    |                                                                                     |              |                                                                                        |               |                                                                                  |    |               |                   |     |               |               |    |               |            |     |                |       |    |     |    |     |    |     |    |     |    |     |    |     |    |     |
| 4  | widowed                                                                                                                                        |                                                                                                                                                                                                                            |                                                                                                                                                                                                                                                                                                                                                                                                                                                                                                                                                                                                                                                                                            |   |               |                                 |                                                                       |               |                                                                                      |    |                                                                                     |              |                                                                                        |               |                                                                                  |    |               |                   |     |               |               |    |               |            |     |                |       |    |     |    |     |    |     |    |     |    |     |    |     |    |     |
| 5  | divorced                                                                                                                                       |                                                                                                                                                                                                                            |                                                                                                                                                                                                                                                                                                                                                                                                                                                                                                                                                                                                                                                                                            |   |               |                                 |                                                                       |               |                                                                                      |    |                                                                                     |              |                                                                                        |               |                                                                                  |    |               |                   |     |               |               |    |               |            |     |                |       |    |     |    |     |    |     |    |     |    |     |    |     |    |     |
| 88 | other /no answer                                                                                                                               |                                                                                                                                                                                                                            |                                                                                                                                                                                                                                                                                                                                                                                                                                                                                                                                                                                                                                                                                            |   |               |                                 |                                                                       |               |                                                                                      |    |                                                                                     |              |                                                                                        |               |                                                                                  |    |               |                   |     |               |               |    |               |            |     |                |       |    |     |    |     |    |     |    |     |    |     |    |     |    |     |
| 22 | education_ch<br>education_de<br>education_at<br>education_other                                                                                | education:<br>Please select your highest educational degree.                                                                                                                                                               | radio, Required<br><table border="1"> <tr><td>0</td><td>No degree</td></tr> <tr><td>1</td><td>Secondary level I (=obligatory school: secondary school, high school)</td></tr> <tr><td>2</td><td>Secondary level II general education (general qualification for university entrance)</td></tr> <tr><td>3</td><td>Secondary level II vocational education (apprenticeship, higher vocational diploma)</td></tr> <tr><td>4</td><td>Tertiary level higher vocational education (higher technical school HF, e.g. HWV, HFG,</td></tr> <tr><td>5</td><td>Tertiary level college (university, technical college, teacher training college)</td></tr> <tr><td>88</td><td>Other</td></tr> </table> | 0 | No degree     | 1                               | Secondary level I (=obligatory school: secondary school, high school) | 2             | Secondary level II general education (general qualification for university entrance) | 3  | Secondary level II vocational education (apprenticeship, higher vocational diploma) | 4            | Tertiary level higher vocational education (higher technical school HF, e.g. HWV, HFG, | 5             | Tertiary level college (university, technical college, teacher training college) | 88 | Other         |                   |     |               |               |    |               |            |     |                |       |    |     |    |     |    |     |    |     |    |     |    |     |    |     |
| 0  | No degree                                                                                                                                      |                                                                                                                                                                                                                            |                                                                                                                                                                                                                                                                                                                                                                                                                                                                                                                                                                                                                                                                                            |   |               |                                 |                                                                       |               |                                                                                      |    |                                                                                     |              |                                                                                        |               |                                                                                  |    |               |                   |     |               |               |    |               |            |     |                |       |    |     |    |     |    |     |    |     |    |     |    |     |    |     |
| 1  | Secondary level I (=obligatory school: secondary school, high school)                                                                          |                                                                                                                                                                                                                            |                                                                                                                                                                                                                                                                                                                                                                                                                                                                                                                                                                                                                                                                                            |   |               |                                 |                                                                       |               |                                                                                      |    |                                                                                     |              |                                                                                        |               |                                                                                  |    |               |                   |     |               |               |    |               |            |     |                |       |    |     |    |     |    |     |    |     |    |     |    |     |    |     |
| 2  | Secondary level II general education (general qualification for university entrance)                                                           |                                                                                                                                                                                                                            |                                                                                                                                                                                                                                                                                                                                                                                                                                                                                                                                                                                                                                                                                            |   |               |                                 |                                                                       |               |                                                                                      |    |                                                                                     |              |                                                                                        |               |                                                                                  |    |               |                   |     |               |               |    |               |            |     |                |       |    |     |    |     |    |     |    |     |    |     |    |     |    |     |
| 3  | Secondary level II vocational education (apprenticeship, higher vocational diploma)                                                            |                                                                                                                                                                                                                            |                                                                                                                                                                                                                                                                                                                                                                                                                                                                                                                                                                                                                                                                                            |   |               |                                 |                                                                       |               |                                                                                      |    |                                                                                     |              |                                                                                        |               |                                                                                  |    |               |                   |     |               |               |    |               |            |     |                |       |    |     |    |     |    |     |    |     |    |     |    |     |    |     |
| 4  | Tertiary level higher vocational education (higher technical school HF, e.g. HWV, HFG,                                                         |                                                                                                                                                                                                                            |                                                                                                                                                                                                                                                                                                                                                                                                                                                                                                                                                                                                                                                                                            |   |               |                                 |                                                                       |               |                                                                                      |    |                                                                                     |              |                                                                                        |               |                                                                                  |    |               |                   |     |               |               |    |               |            |     |                |       |    |     |    |     |    |     |    |     |    |     |    |     |    |     |
| 5  | Tertiary level college (university, technical college, teacher training college)                                                               |                                                                                                                                                                                                                            |                                                                                                                                                                                                                                                                                                                                                                                                                                                                                                                                                                                                                                                                                            |   |               |                                 |                                                                       |               |                                                                                      |    |                                                                                     |              |                                                                                        |               |                                                                                  |    |               |                   |     |               |               |    |               |            |     |                |       |    |     |    |     |    |     |    |     |    |     |    |     |    |     |
| 88 | Other                                                                                                                                          |                                                                                                                                                                                                                            |                                                                                                                                                                                                                                                                                                                                                                                                                                                                                                                                                                                                                                                                                            |   |               |                                 |                                                                       |               |                                                                                      |    |                                                                                     |              |                                                                                        |               |                                                                                  |    |               |                   |     |               |               |    |               |            |     |                |       |    |     |    |     |    |     |    |     |    |     |    |     |    |     |
| 26 | education_88<br>Show the field ONLY if:<br>[education_ch] = '88' or [education_de] = '88' or [education_at] = '88' or [education_other] = '88' | education - other<br><i>Please specify.</i>                                                                                                                                                                                | notes, Required                                                                                                                                                                                                                                                                                                                                                                                                                                                                                                                                                                                                                                                                            |   |               |                                 |                                                                       |               |                                                                                      |    |                                                                                     |              |                                                                                        |               |                                                                                  |    |               |                   |     |               |               |    |               |            |     |                |       |    |     |    |     |    |     |    |     |    |     |    |     |    |     |
| 27 | education_0<br>Show the field ONLY if:<br>[education_ch] = '0' or [education_de] = '0' or [education_at] = '0' or [education_other] = '0'      | How many years did you go to school?                                                                                                                                                                                       | text (number, Min: 0, Max: 12), Required                                                                                                                                                                                                                                                                                                                                                                                                                                                                                                                                                                                                                                                   |   |               |                                 |                                                                       |               |                                                                                      |    |                                                                                     |              |                                                                                        |               |                                                                                  |    |               |                   |     |               |               |    |               |            |     |                |       |    |     |    |     |    |     |    |     |    |     |    |     |    |     |
| 28 | employment<br>Show the field ONLY if: [sex] = '1' and [age] >= 18                                                                              | employment status:<br>Please select ALL applicable.                                                                                                                                                                        | checkbox, Required<br><table border="1"> <tr><td>1</td><td>employment__1</td><td>Full time (100%)</td></tr> <tr><td>2</td><td>employment__2</td><td>Part time</td></tr> <tr><td>3</td><td>employment__3</td><td>Hourly wages</td></tr> <tr><td>4</td><td>employment__4</td><td>Student / in training</td></tr> <tr><td>5</td><td>employment__5</td><td>Unpaid internship</td></tr> <tr><td>6</td><td>employment__6</td><td>Self-employed</td></tr> <tr><td>7</td><td>employment__7</td><td>Unemployed</td></tr> <tr><td>88</td><td>employment__88</td><td>Other</td></tr> </table>                                                                                                         | 1 | employment__1 | Full time (100%)                | 2                                                                     | employment__2 | Part time                                                                            | 3  | employment__3                                                                       | Hourly wages | 4                                                                                      | employment__4 | Student / in training                                                            | 5  | employment__5 | Unpaid internship | 6   | employment__6 | Self-employed | 7  | employment__7 | Unemployed | 88  | employment__88 | Other |    |     |    |     |    |     |    |     |    |     |    |     |    |     |
| 1  | employment__1                                                                                                                                  | Full time (100%)                                                                                                                                                                                                           |                                                                                                                                                                                                                                                                                                                                                                                                                                                                                                                                                                                                                                                                                            |   |               |                                 |                                                                       |               |                                                                                      |    |                                                                                     |              |                                                                                        |               |                                                                                  |    |               |                   |     |               |               |    |               |            |     |                |       |    |     |    |     |    |     |    |     |    |     |    |     |    |     |
| 2  | employment__2                                                                                                                                  | Part time                                                                                                                                                                                                                  |                                                                                                                                                                                                                                                                                                                                                                                                                                                                                                                                                                                                                                                                                            |   |               |                                 |                                                                       |               |                                                                                      |    |                                                                                     |              |                                                                                        |               |                                                                                  |    |               |                   |     |               |               |    |               |            |     |                |       |    |     |    |     |    |     |    |     |    |     |    |     |    |     |
| 3  | employment__3                                                                                                                                  | Hourly wages                                                                                                                                                                                                               |                                                                                                                                                                                                                                                                                                                                                                                                                                                                                                                                                                                                                                                                                            |   |               |                                 |                                                                       |               |                                                                                      |    |                                                                                     |              |                                                                                        |               |                                                                                  |    |               |                   |     |               |               |    |               |            |     |                |       |    |     |    |     |    |     |    |     |    |     |    |     |    |     |
| 4  | employment__4                                                                                                                                  | Student / in training                                                                                                                                                                                                      |                                                                                                                                                                                                                                                                                                                                                                                                                                                                                                                                                                                                                                                                                            |   |               |                                 |                                                                       |               |                                                                                      |    |                                                                                     |              |                                                                                        |               |                                                                                  |    |               |                   |     |               |               |    |               |            |     |                |       |    |     |    |     |    |     |    |     |    |     |    |     |    |     |
| 5  | employment__5                                                                                                                                  | Unpaid internship                                                                                                                                                                                                          |                                                                                                                                                                                                                                                                                                                                                                                                                                                                                                                                                                                                                                                                                            |   |               |                                 |                                                                       |               |                                                                                      |    |                                                                                     |              |                                                                                        |               |                                                                                  |    |               |                   |     |               |               |    |               |            |     |                |       |    |     |    |     |    |     |    |     |    |     |    |     |    |     |
| 6  | employment__6                                                                                                                                  | Self-employed                                                                                                                                                                                                              |                                                                                                                                                                                                                                                                                                                                                                                                                                                                                                                                                                                                                                                                                            |   |               |                                 |                                                                       |               |                                                                                      |    |                                                                                     |              |                                                                                        |               |                                                                                  |    |               |                   |     |               |               |    |               |            |     |                |       |    |     |    |     |    |     |    |     |    |     |    |     |    |     |
| 7  | employment__7                                                                                                                                  | Unemployed                                                                                                                                                                                                                 |                                                                                                                                                                                                                                                                                                                                                                                                                                                                                                                                                                                                                                                                                            |   |               |                                 |                                                                       |               |                                                                                      |    |                                                                                     |              |                                                                                        |               |                                                                                  |    |               |                   |     |               |               |    |               |            |     |                |       |    |     |    |     |    |     |    |     |    |     |    |     |    |     |
| 88 | employment__88                                                                                                                                 | Other                                                                                                                                                                                                                      |                                                                                                                                                                                                                                                                                                                                                                                                                                                                                                                                                                                                                                                                                            |   |               |                                 |                                                                       |               |                                                                                      |    |                                                                                     |              |                                                                                        |               |                                                                                  |    |               |                   |     |               |               |    |               |            |     |                |       |    |     |    |     |    |     |    |     |    |     |    |     |    |     |
| 29 | employment_spec<br>Show the field ONLY if:<br>[employment(2)] = '1'                                                                            | What is your pensem for your part-time work? [%]                                                                                                                                                                           | dropdown, Required<br><table border="1"> <tr><td>1</td><td>5%</td></tr> <tr><td>2</td><td>10%</td></tr> <tr><td>3</td><td>15%</td></tr> <tr><td>4</td><td>20%</td></tr> <tr><td>5</td><td>25%</td></tr> <tr><td>6</td><td>30%</td></tr> <tr><td>7</td><td>35%</td></tr> <tr><td>8</td><td>40%</td></tr> <tr><td>9</td><td>45%</td></tr> <tr><td>10</td><td>50%</td></tr> <tr><td>11</td><td>55%</td></tr> <tr><td>12</td><td>60%</td></tr> <tr><td>13</td><td>65%</td></tr> <tr><td>14</td><td>70%</td></tr> <tr><td>15</td><td>75%</td></tr> <tr><td>16</td><td>80%</td></tr> <tr><td>17</td><td>85%</td></tr> <tr><td>18</td><td>90%</td></tr> <tr><td>19</td><td>95%</td></tr> </table> | 1 | 5%            | 2                               | 10%                                                                   | 3             | 15%                                                                                  | 4  | 20%                                                                                 | 5            | 25%                                                                                    | 6             | 30%                                                                              | 7  | 35%           | 8                 | 40% | 9             | 45%           | 10 | 50%           | 11         | 55% | 12             | 60%   | 13 | 65% | 14 | 70% | 15 | 75% | 16 | 80% | 17 | 85% | 18 | 90% | 19 | 95% |
| 1  | 5%                                                                                                                                             |                                                                                                                                                                                                                            |                                                                                                                                                                                                                                                                                                                                                                                                                                                                                                                                                                                                                                                                                            |   |               |                                 |                                                                       |               |                                                                                      |    |                                                                                     |              |                                                                                        |               |                                                                                  |    |               |                   |     |               |               |    |               |            |     |                |       |    |     |    |     |    |     |    |     |    |     |    |     |    |     |
| 2  | 10%                                                                                                                                            |                                                                                                                                                                                                                            |                                                                                                                                                                                                                                                                                                                                                                                                                                                                                                                                                                                                                                                                                            |   |               |                                 |                                                                       |               |                                                                                      |    |                                                                                     |              |                                                                                        |               |                                                                                  |    |               |                   |     |               |               |    |               |            |     |                |       |    |     |    |     |    |     |    |     |    |     |    |     |    |     |
| 3  | 15%                                                                                                                                            |                                                                                                                                                                                                                            |                                                                                                                                                                                                                                                                                                                                                                                                                                                                                                                                                                                                                                                                                            |   |               |                                 |                                                                       |               |                                                                                      |    |                                                                                     |              |                                                                                        |               |                                                                                  |    |               |                   |     |               |               |    |               |            |     |                |       |    |     |    |     |    |     |    |     |    |     |    |     |    |     |
| 4  | 20%                                                                                                                                            |                                                                                                                                                                                                                            |                                                                                                                                                                                                                                                                                                                                                                                                                                                                                                                                                                                                                                                                                            |   |               |                                 |                                                                       |               |                                                                                      |    |                                                                                     |              |                                                                                        |               |                                                                                  |    |               |                   |     |               |               |    |               |            |     |                |       |    |     |    |     |    |     |    |     |    |     |    |     |    |     |
| 5  | 25%                                                                                                                                            |                                                                                                                                                                                                                            |                                                                                                                                                                                                                                                                                                                                                                                                                                                                                                                                                                                                                                                                                            |   |               |                                 |                                                                       |               |                                                                                      |    |                                                                                     |              |                                                                                        |               |                                                                                  |    |               |                   |     |               |               |    |               |            |     |                |       |    |     |    |     |    |     |    |     |    |     |    |     |    |     |
| 6  | 30%                                                                                                                                            |                                                                                                                                                                                                                            |                                                                                                                                                                                                                                                                                                                                                                                                                                                                                                                                                                                                                                                                                            |   |               |                                 |                                                                       |               |                                                                                      |    |                                                                                     |              |                                                                                        |               |                                                                                  |    |               |                   |     |               |               |    |               |            |     |                |       |    |     |    |     |    |     |    |     |    |     |    |     |    |     |
| 7  | 35%                                                                                                                                            |                                                                                                                                                                                                                            |                                                                                                                                                                                                                                                                                                                                                                                                                                                                                                                                                                                                                                                                                            |   |               |                                 |                                                                       |               |                                                                                      |    |                                                                                     |              |                                                                                        |               |                                                                                  |    |               |                   |     |               |               |    |               |            |     |                |       |    |     |    |     |    |     |    |     |    |     |    |     |    |     |
| 8  | 40%                                                                                                                                            |                                                                                                                                                                                                                            |                                                                                                                                                                                                                                                                                                                                                                                                                                                                                                                                                                                                                                                                                            |   |               |                                 |                                                                       |               |                                                                                      |    |                                                                                     |              |                                                                                        |               |                                                                                  |    |               |                   |     |               |               |    |               |            |     |                |       |    |     |    |     |    |     |    |     |    |     |    |     |    |     |
| 9  | 45%                                                                                                                                            |                                                                                                                                                                                                                            |                                                                                                                                                                                                                                                                                                                                                                                                                                                                                                                                                                                                                                                                                            |   |               |                                 |                                                                       |               |                                                                                      |    |                                                                                     |              |                                                                                        |               |                                                                                  |    |               |                   |     |               |               |    |               |            |     |                |       |    |     |    |     |    |     |    |     |    |     |    |     |    |     |
| 10 | 50%                                                                                                                                            |                                                                                                                                                                                                                            |                                                                                                                                                                                                                                                                                                                                                                                                                                                                                                                                                                                                                                                                                            |   |               |                                 |                                                                       |               |                                                                                      |    |                                                                                     |              |                                                                                        |               |                                                                                  |    |               |                   |     |               |               |    |               |            |     |                |       |    |     |    |     |    |     |    |     |    |     |    |     |    |     |
| 11 | 55%                                                                                                                                            |                                                                                                                                                                                                                            |                                                                                                                                                                                                                                                                                                                                                                                                                                                                                                                                                                                                                                                                                            |   |               |                                 |                                                                       |               |                                                                                      |    |                                                                                     |              |                                                                                        |               |                                                                                  |    |               |                   |     |               |               |    |               |            |     |                |       |    |     |    |     |    |     |    |     |    |     |    |     |    |     |
| 12 | 60%                                                                                                                                            |                                                                                                                                                                                                                            |                                                                                                                                                                                                                                                                                                                                                                                                                                                                                                                                                                                                                                                                                            |   |               |                                 |                                                                       |               |                                                                                      |    |                                                                                     |              |                                                                                        |               |                                                                                  |    |               |                   |     |               |               |    |               |            |     |                |       |    |     |    |     |    |     |    |     |    |     |    |     |    |     |
| 13 | 65%                                                                                                                                            |                                                                                                                                                                                                                            |                                                                                                                                                                                                                                                                                                                                                                                                                                                                                                                                                                                                                                                                                            |   |               |                                 |                                                                       |               |                                                                                      |    |                                                                                     |              |                                                                                        |               |                                                                                  |    |               |                   |     |               |               |    |               |            |     |                |       |    |     |    |     |    |     |    |     |    |     |    |     |    |     |
| 14 | 70%                                                                                                                                            |                                                                                                                                                                                                                            |                                                                                                                                                                                                                                                                                                                                                                                                                                                                                                                                                                                                                                                                                            |   |               |                                 |                                                                       |               |                                                                                      |    |                                                                                     |              |                                                                                        |               |                                                                                  |    |               |                   |     |               |               |    |               |            |     |                |       |    |     |    |     |    |     |    |     |    |     |    |     |    |     |
| 15 | 75%                                                                                                                                            |                                                                                                                                                                                                                            |                                                                                                                                                                                                                                                                                                                                                                                                                                                                                                                                                                                                                                                                                            |   |               |                                 |                                                                       |               |                                                                                      |    |                                                                                     |              |                                                                                        |               |                                                                                  |    |               |                   |     |               |               |    |               |            |     |                |       |    |     |    |     |    |     |    |     |    |     |    |     |    |     |
| 16 | 80%                                                                                                                                            |                                                                                                                                                                                                                            |                                                                                                                                                                                                                                                                                                                                                                                                                                                                                                                                                                                                                                                                                            |   |               |                                 |                                                                       |               |                                                                                      |    |                                                                                     |              |                                                                                        |               |                                                                                  |    |               |                   |     |               |               |    |               |            |     |                |       |    |     |    |     |    |     |    |     |    |     |    |     |    |     |
| 17 | 85%                                                                                                                                            |                                                                                                                                                                                                                            |                                                                                                                                                                                                                                                                                                                                                                                                                                                                                                                                                                                                                                                                                            |   |               |                                 |                                                                       |               |                                                                                      |    |                                                                                     |              |                                                                                        |               |                                                                                  |    |               |                   |     |               |               |    |               |            |     |                |       |    |     |    |     |    |     |    |     |    |     |    |     |    |     |
| 18 | 90%                                                                                                                                            |                                                                                                                                                                                                                            |                                                                                                                                                                                                                                                                                                                                                                                                                                                                                                                                                                                                                                                                                            |   |               |                                 |                                                                       |               |                                                                                      |    |                                                                                     |              |                                                                                        |               |                                                                                  |    |               |                   |     |               |               |    |               |            |     |                |       |    |     |    |     |    |     |    |     |    |     |    |     |    |     |
| 19 | 95%                                                                                                                                            |                                                                                                                                                                                                                            |                                                                                                                                                                                                                                                                                                                                                                                                                                                                                                                                                                                                                                                                                            |   |               |                                 |                                                                       |               |                                                                                      |    |                                                                                     |              |                                                                                        |               |                                                                                  |    |               |                   |     |               |               |    |               |            |     |                |       |    |     |    |     |    |     |    |     |    |     |    |     |    |     |
| 30 | employment_88<br>Show the field ONLY if:<br>[employment(88)] = '1'                                                                             | employment status - other<br><i>Please specify.</i>                                                                                                                                                                        | notes, Required                                                                                                                                                                                                                                                                                                                                                                                                                                                                                                                                                                                                                                                                            |   |               |                                 |                                                                       |               |                                                                                      |    |                                                                                     |              |                                                                                        |               |                                                                                  |    |               |                   |     |               |               |    |               |            |     |                |       |    |     |    |     |    |     |    |     |    |     |    |     |    |     |
| 31 | ethnicity<br>Show the field ONLY if: [sex] = '1' and [age] >= 18                                                                               | Ethnicity (multiple answers possible)<br><i>Please select your ethnicity. If you are not sure select the one that fits best. It is possible to select more than one answer if your parents are from different regions.</i> | checkbox, Required<br><table border="1"> <tr><td>1</td><td>ethnicity__1</td><td>White (caucasian/light-skinned)</td></tr> <tr><td>2</td><td>ethnicity__2</td><td>Mediterranean (France; Portugal; Spain; Italy; Greece; Malta; Cyprus)</td></tr> </table>                                                                                                                                                                                                                                                                                                                                                                                                                                  | 1 | ethnicity__1  | White (caucasian/light-skinned) | 2                                                                     | ethnicity__2  | Mediterranean (France; Portugal; Spain; Italy; Greece; Malta; Cyprus)                |    |                                                                                     |              |                                                                                        |               |                                                                                  |    |               |                   |     |               |               |    |               |            |     |                |       |    |     |    |     |    |     |    |     |    |     |    |     |    |     |
| 1  | ethnicity__1                                                                                                                                   | White (caucasian/light-skinned)                                                                                                                                                                                            |                                                                                                                                                                                                                                                                                                                                                                                                                                                                                                                                                                                                                                                                                            |   |               |                                 |                                                                       |               |                                                                                      |    |                                                                                     |              |                                                                                        |               |                                                                                  |    |               |                   |     |               |               |    |               |            |     |                |       |    |     |    |     |    |     |    |     |    |     |    |     |    |     |
| 2  | ethnicity__2                                                                                                                                   | Mediterranean (France; Portugal; Spain; Italy; Greece; Malta; Cyprus)                                                                                                                                                      |                                                                                                                                                                                                                                                                                                                                                                                                                                                                                                                                                                                                                                                                                            |   |               |                                 |                                                                       |               |                                                                                      |    |                                                                                     |              |                                                                                        |               |                                                                                  |    |               |                   |     |               |               |    |               |            |     |                |       |    |     |    |     |    |     |    |     |    |     |    |     |    |     |

|    |                                                                         |                                                                                                                                                                    |                                                                                                                                                                                                                                                                                                                                                                                                                                                                                                                                                                                                                                                                                                                                                                                                                                                                                                                                             |   |                   |                                                            |            |                   |                                              |   |                   |                                                                                            |    |                    |                                                                                         |   |              |                                                                                                                               |   |              |                                  |   |              |       |    |               |       |
|----|-------------------------------------------------------------------------|--------------------------------------------------------------------------------------------------------------------------------------------------------------------|---------------------------------------------------------------------------------------------------------------------------------------------------------------------------------------------------------------------------------------------------------------------------------------------------------------------------------------------------------------------------------------------------------------------------------------------------------------------------------------------------------------------------------------------------------------------------------------------------------------------------------------------------------------------------------------------------------------------------------------------------------------------------------------------------------------------------------------------------------------------------------------------------------------------------------------------|---|-------------------|------------------------------------------------------------|------------|-------------------|----------------------------------------------|---|-------------------|--------------------------------------------------------------------------------------------|----|--------------------|-----------------------------------------------------------------------------------------|---|--------------|-------------------------------------------------------------------------------------------------------------------------------|---|--------------|----------------------------------|---|--------------|-------|----|---------------|-------|
|    |                                                                         |                                                                                                                                                                    | <table border="1"> <tr> <td>3</td> <td>ethnicity__3</td> <td>Hispanic (Americans with Spanish or Latin-American origin)</td> </tr> <tr> <td>4</td> <td>ethnicity__4</td> <td>Middle East (arabic countries, Iran, Turkey)</td> </tr> <tr> <td>5</td> <td>ethnicity__5</td> <td>South-Asian (Afghanistan, Bangladesh, Bhutan, India, Maldives, Nepal, Pakistan, Sri Lanka)</td> </tr> <tr> <td>6</td> <td>ethnicity__6</td> <td>East-Asian (China, Hong Kong, Macau, Taiwan, Japan, North Korea, South Korea, Mongolia)</td> </tr> <tr> <td>7</td> <td>ethnicity__7</td> <td>Southeast-Asian (Brunei, Cambodia, Indonesia, Laos, Malaysia, Myanmar, Philippines, Singapore, Thailand, East Timor, Vietnam)</td> </tr> <tr> <td>8</td> <td>ethnicity__8</td> <td>Aborigines (=Australian natives)</td> </tr> <tr> <td>9</td> <td>ethnicity__9</td> <td>Black</td> </tr> <tr> <td>88</td> <td>ethnicity__88</td> <td>Other</td> </tr> </table> | 3 | ethnicity__3      | Hispanic (Americans with Spanish or Latin-American origin) | 4          | ethnicity__4      | Middle East (arabic countries, Iran, Turkey) | 5 | ethnicity__5      | South-Asian (Afghanistan, Bangladesh, Bhutan, India, Maldives, Nepal, Pakistan, Sri Lanka) | 6  | ethnicity__6       | East-Asian (China, Hong Kong, Macau, Taiwan, Japan, North Korea, South Korea, Mongolia) | 7 | ethnicity__7 | Southeast-Asian (Brunei, Cambodia, Indonesia, Laos, Malaysia, Myanmar, Philippines, Singapore, Thailand, East Timor, Vietnam) | 8 | ethnicity__8 | Aborigines (=Australian natives) | 9 | ethnicity__9 | Black | 88 | ethnicity__88 | Other |
| 3  | ethnicity__3                                                            | Hispanic (Americans with Spanish or Latin-American origin)                                                                                                         |                                                                                                                                                                                                                                                                                                                                                                                                                                                                                                                                                                                                                                                                                                                                                                                                                                                                                                                                             |   |                   |                                                            |            |                   |                                              |   |                   |                                                                                            |    |                    |                                                                                         |   |              |                                                                                                                               |   |              |                                  |   |              |       |    |               |       |
| 4  | ethnicity__4                                                            | Middle East (arabic countries, Iran, Turkey)                                                                                                                       |                                                                                                                                                                                                                                                                                                                                                                                                                                                                                                                                                                                                                                                                                                                                                                                                                                                                                                                                             |   |                   |                                                            |            |                   |                                              |   |                   |                                                                                            |    |                    |                                                                                         |   |              |                                                                                                                               |   |              |                                  |   |              |       |    |               |       |
| 5  | ethnicity__5                                                            | South-Asian (Afghanistan, Bangladesh, Bhutan, India, Maldives, Nepal, Pakistan, Sri Lanka)                                                                         |                                                                                                                                                                                                                                                                                                                                                                                                                                                                                                                                                                                                                                                                                                                                                                                                                                                                                                                                             |   |                   |                                                            |            |                   |                                              |   |                   |                                                                                            |    |                    |                                                                                         |   |              |                                                                                                                               |   |              |                                  |   |              |       |    |               |       |
| 6  | ethnicity__6                                                            | East-Asian (China, Hong Kong, Macau, Taiwan, Japan, North Korea, South Korea, Mongolia)                                                                            |                                                                                                                                                                                                                                                                                                                                                                                                                                                                                                                                                                                                                                                                                                                                                                                                                                                                                                                                             |   |                   |                                                            |            |                   |                                              |   |                   |                                                                                            |    |                    |                                                                                         |   |              |                                                                                                                               |   |              |                                  |   |              |       |    |               |       |
| 7  | ethnicity__7                                                            | Southeast-Asian (Brunei, Cambodia, Indonesia, Laos, Malaysia, Myanmar, Philippines, Singapore, Thailand, East Timor, Vietnam)                                      |                                                                                                                                                                                                                                                                                                                                                                                                                                                                                                                                                                                                                                                                                                                                                                                                                                                                                                                                             |   |                   |                                                            |            |                   |                                              |   |                   |                                                                                            |    |                    |                                                                                         |   |              |                                                                                                                               |   |              |                                  |   |              |       |    |               |       |
| 8  | ethnicity__8                                                            | Aborigines (=Australian natives)                                                                                                                                   |                                                                                                                                                                                                                                                                                                                                                                                                                                                                                                                                                                                                                                                                                                                                                                                                                                                                                                                                             |   |                   |                                                            |            |                   |                                              |   |                   |                                                                                            |    |                    |                                                                                         |   |              |                                                                                                                               |   |              |                                  |   |              |       |    |               |       |
| 9  | ethnicity__9                                                            | Black                                                                                                                                                              |                                                                                                                                                                                                                                                                                                                                                                                                                                                                                                                                                                                                                                                                                                                                                                                                                                                                                                                                             |   |                   |                                                            |            |                   |                                              |   |                   |                                                                                            |    |                    |                                                                                         |   |              |                                                                                                                               |   |              |                                  |   |              |       |    |               |       |
| 88 | ethnicity__88                                                           | Other                                                                                                                                                              |                                                                                                                                                                                                                                                                                                                                                                                                                                                                                                                                                                                                                                                                                                                                                                                                                                                                                                                                             |   |                   |                                                            |            |                   |                                              |   |                   |                                                                                            |    |                    |                                                                                         |   |              |                                                                                                                               |   |              |                                  |   |              |       |    |               |       |
| 32 | ethnicity_88<br>Show the field ONLY if: [ethnicity(88)] = '1'           | Ethnicity - Other<br><i>Please specify.</i>                                                                                                                        | notes, Required                                                                                                                                                                                                                                                                                                                                                                                                                                                                                                                                                                                                                                                                                                                                                                                                                                                                                                                             |   |                   |                                                            |            |                   |                                              |   |                   |                                                                                            |    |                    |                                                                                         |   |              |                                                                                                                               |   |              |                                  |   |              |       |    |               |       |
| 33 | ethnicity_spec<br>Show the field ONLY if: [ethnicity(1)] = '1'          | What region do you come from?<br><i>Please specify your descendance. It is possible to select more than one answer if your parents are from different regions.</i> | checkbox, Required<br><table border="1"> <tr> <td>1</td> <td>ethnicity_spec__1</td> <td>Europe</td> </tr> <tr> <td>2</td> <td>ethnicity_spec__2</td> <td>Australia</td> </tr> <tr> <td>3</td> <td>ethnicity_spec__3</td> <td>North-America</td> </tr> <tr> <td>88</td> <td>ethnicity_spec__88</td> <td>Other</td> </tr> </table>                                                                                                                                                                                                                                                                                                                                                                                                                                                                                                                                                                                                            | 1 | ethnicity_spec__1 | Europe                                                     | 2          | ethnicity_spec__2 | Australia                                    | 3 | ethnicity_spec__3 | North-America                                                                              | 88 | ethnicity_spec__88 | Other                                                                                   |   |              |                                                                                                                               |   |              |                                  |   |              |       |    |               |       |
| 1  | ethnicity_spec__1                                                       | Europe                                                                                                                                                             |                                                                                                                                                                                                                                                                                                                                                                                                                                                                                                                                                                                                                                                                                                                                                                                                                                                                                                                                             |   |                   |                                                            |            |                   |                                              |   |                   |                                                                                            |    |                    |                                                                                         |   |              |                                                                                                                               |   |              |                                  |   |              |       |    |               |       |
| 2  | ethnicity_spec__2                                                       | Australia                                                                                                                                                          |                                                                                                                                                                                                                                                                                                                                                                                                                                                                                                                                                                                                                                                                                                                                                                                                                                                                                                                                             |   |                   |                                                            |            |                   |                                              |   |                   |                                                                                            |    |                    |                                                                                         |   |              |                                                                                                                               |   |              |                                  |   |              |       |    |               |       |
| 3  | ethnicity_spec__3                                                       | North-America                                                                                                                                                      |                                                                                                                                                                                                                                                                                                                                                                                                                                                                                                                                                                                                                                                                                                                                                                                                                                                                                                                                             |   |                   |                                                            |            |                   |                                              |   |                   |                                                                                            |    |                    |                                                                                         |   |              |                                                                                                                               |   |              |                                  |   |              |       |    |               |       |
| 88 | ethnicity_spec__88                                                      | Other                                                                                                                                                              |                                                                                                                                                                                                                                                                                                                                                                                                                                                                                                                                                                                                                                                                                                                                                                                                                                                                                                                                             |   |                   |                                                            |            |                   |                                              |   |                   |                                                                                            |    |                    |                                                                                         |   |              |                                                                                                                               |   |              |                                  |   |              |       |    |               |       |
| 34 | ethnicity_spec_88<br>Show the field ONLY if: [ethnicity_spec(88)] = '1' | region - other<br><i>Please specify.</i>                                                                                                                           | notes, Required                                                                                                                                                                                                                                                                                                                                                                                                                                                                                                                                                                                                                                                                                                                                                                                                                                                                                                                             |   |                   |                                                            |            |                   |                                              |   |                   |                                                                                            |    |                    |                                                                                         |   |              |                                                                                                                               |   |              |                                  |   |              |       |    |               |       |
| 35 | charakteristika_complete                                                | Section Header: <i>Form Status</i><br>Complete?                                                                                                                    | dropdown<br><table border="1"> <tr> <td>0</td> <td>Incomplete</td> </tr> <tr> <td>1</td> <td>Unverified</td> </tr> <tr> <td>2</td> <td>Complete</td> </tr> </table>                                                                                                                                                                                                                                                                                                                                                                                                                                                                                                                                                                                                                                                                                                                                                                         | 0 | Incomplete        | 1                                                          | Unverified | 2                 | Complete                                     |   |                   |                                                                                            |    |                    |                                                                                         |   |              |                                                                                                                               |   |              |                                  |   |              |       |    |               |       |
| 0  | Incomplete                                                              |                                                                                                                                                                    |                                                                                                                                                                                                                                                                                                                                                                                                                                                                                                                                                                                                                                                                                                                                                                                                                                                                                                                                             |   |                   |                                                            |            |                   |                                              |   |                   |                                                                                            |    |                    |                                                                                         |   |              |                                                                                                                               |   |              |                                  |   |              |       |    |               |       |
| 1  | Unverified                                                              |                                                                                                                                                                    |                                                                                                                                                                                                                                                                                                                                                                                                                                                                                                                                                                                                                                                                                                                                                                                                                                                                                                                                             |   |                   |                                                            |            |                   |                                              |   |                   |                                                                                            |    |                    |                                                                                         |   |              |                                                                                                                               |   |              |                                  |   |              |       |    |               |       |
| 2  | Complete                                                                |                                                                                                                                                                    |                                                                                                                                                                                                                                                                                                                                                                                                                                                                                                                                                                                                                                                                                                                                                                                                                                                                                                                                             |   |                   |                                                            |            |                   |                                              |   |                   |                                                                                            |    |                    |                                                                                         |   |              |                                                                                                                               |   |              |                                  |   |              |       |    |               |       |

|    |                                                                 |                                                                                                                                                                               |                                                                                                                                                                                                                                                                                                                                                                                                                                                                                                                                                                                                                                                                                                                                                                                                                                                                                                                                                                                                                                                                                                                                                                                                                                                                                                                                                                                                                                                                                                                                                                                                                                                                             |   |                     |    |               |   |                    |   |   |   |   |   |   |   |   |   |   |   |   |    |    |    |    |    |    |    |    |    |    |    |    |    |    |    |    |    |    |    |    |    |    |    |    |    |    |    |    |    |    |    |    |    |    |    |    |    |    |    |    |    |    |    |    |    |    |    |    |    |    |    |    |    |    |    |    |    |    |    |    |    |    |    |    |    |    |    |    |    |    |    |    |    |    |    |    |    |    |    |    |    |    |
|----|-----------------------------------------------------------------|-------------------------------------------------------------------------------------------------------------------------------------------------------------------------------|-----------------------------------------------------------------------------------------------------------------------------------------------------------------------------------------------------------------------------------------------------------------------------------------------------------------------------------------------------------------------------------------------------------------------------------------------------------------------------------------------------------------------------------------------------------------------------------------------------------------------------------------------------------------------------------------------------------------------------------------------------------------------------------------------------------------------------------------------------------------------------------------------------------------------------------------------------------------------------------------------------------------------------------------------------------------------------------------------------------------------------------------------------------------------------------------------------------------------------------------------------------------------------------------------------------------------------------------------------------------------------------------------------------------------------------------------------------------------------------------------------------------------------------------------------------------------------------------------------------------------------------------------------------------------------|---|---------------------|----|---------------|---|--------------------|---|---|---|---|---|---|---|---|---|---|---|---|----|----|----|----|----|----|----|----|----|----|----|----|----|----|----|----|----|----|----|----|----|----|----|----|----|----|----|----|----|----|----|----|----|----|----|----|----|----|----|----|----|----|----|----|----|----|----|----|----|----|----|----|----|----|----|----|----|----|----|----|----|----|----|----|----|----|----|----|----|----|----|----|----|----|----|----|----|----|----|----|----|----|
| 36 | mens_age_know                                                   | Section Header: <i>menstrual cycle profile</i><br>Do you know how old you were when you had your first menstruation?                                                          | radio, Required<br><table border="1" data-bbox="1015 241 1230 358"><tr><td>1</td><td>Age known (approx.)</td></tr><tr><td>99</td><td>Age not known</td></tr><tr><td>2</td><td>no menstuation yet</td></tr></table>                                                                                                                                                                                                                                                                                                                                                                                                                                                                                                                                                                                                                                                                                                                                                                                                                                                                                                                                                                                                                                                                                                                                                                                                                                                                                                                                                                                                                                                          | 1 | Age known (approx.) | 99 | Age not known | 2 | no menstuation yet |   |   |   |   |   |   |   |   |   |   |   |   |    |    |    |    |    |    |    |    |    |    |    |    |    |    |    |    |    |    |    |    |    |    |    |    |    |    |    |    |    |    |    |    |    |    |    |    |    |    |    |    |    |    |    |    |    |    |    |    |    |    |    |    |    |    |    |    |    |    |    |    |    |    |    |    |    |    |    |    |    |    |    |    |    |    |    |    |    |    |    |    |    |    |
| 1  | Age known (approx.)                                             |                                                                                                                                                                               |                                                                                                                                                                                                                                                                                                                                                                                                                                                                                                                                                                                                                                                                                                                                                                                                                                                                                                                                                                                                                                                                                                                                                                                                                                                                                                                                                                                                                                                                                                                                                                                                                                                                             |   |                     |    |               |   |                    |   |   |   |   |   |   |   |   |   |   |   |   |    |    |    |    |    |    |    |    |    |    |    |    |    |    |    |    |    |    |    |    |    |    |    |    |    |    |    |    |    |    |    |    |    |    |    |    |    |    |    |    |    |    |    |    |    |    |    |    |    |    |    |    |    |    |    |    |    |    |    |    |    |    |    |    |    |    |    |    |    |    |    |    |    |    |    |    |    |    |    |    |    |    |
| 99 | Age not known                                                   |                                                                                                                                                                               |                                                                                                                                                                                                                                                                                                                                                                                                                                                                                                                                                                                                                                                                                                                                                                                                                                                                                                                                                                                                                                                                                                                                                                                                                                                                                                                                                                                                                                                                                                                                                                                                                                                                             |   |                     |    |               |   |                    |   |   |   |   |   |   |   |   |   |   |   |   |    |    |    |    |    |    |    |    |    |    |    |    |    |    |    |    |    |    |    |    |    |    |    |    |    |    |    |    |    |    |    |    |    |    |    |    |    |    |    |    |    |    |    |    |    |    |    |    |    |    |    |    |    |    |    |    |    |    |    |    |    |    |    |    |    |    |    |    |    |    |    |    |    |    |    |    |    |    |    |    |    |    |
| 2  | no menstuation yet                                              |                                                                                                                                                                               |                                                                                                                                                                                                                                                                                                                                                                                                                                                                                                                                                                                                                                                                                                                                                                                                                                                                                                                                                                                                                                                                                                                                                                                                                                                                                                                                                                                                                                                                                                                                                                                                                                                                             |   |                     |    |               |   |                    |   |   |   |   |   |   |   |   |   |   |   |   |    |    |    |    |    |    |    |    |    |    |    |    |    |    |    |    |    |    |    |    |    |    |    |    |    |    |    |    |    |    |    |    |    |    |    |    |    |    |    |    |    |    |    |    |    |    |    |    |    |    |    |    |    |    |    |    |    |    |    |    |    |    |    |    |    |    |    |    |    |    |    |    |    |    |    |    |    |    |    |    |    |    |
| 37 | mens_age_nr<br>Show the field ONLY if:<br>[mens_age_know] = '1' | How many years ago did you have your first menstruation? Please subtract your your age when you had your first menstruation from your current age.<br><i>Number in years.</i> | dropdown, Required<br><table border="1" data-bbox="1015 398 1230 2083"><tr><td>1</td><td>1</td></tr><tr><td>2</td><td>2</td></tr><tr><td>3</td><td>3</td></tr><tr><td>4</td><td>4</td></tr><tr><td>5</td><td>5</td></tr><tr><td>6</td><td>6</td></tr><tr><td>7</td><td>7</td></tr><tr><td>8</td><td>8</td></tr><tr><td>9</td><td>9</td></tr><tr><td>10</td><td>10</td></tr><tr><td>11</td><td>11</td></tr><tr><td>12</td><td>12</td></tr><tr><td>13</td><td>13</td></tr><tr><td>14</td><td>14</td></tr><tr><td>15</td><td>15</td></tr><tr><td>16</td><td>16</td></tr><tr><td>17</td><td>17</td></tr><tr><td>18</td><td>18</td></tr><tr><td>19</td><td>19</td></tr><tr><td>20</td><td>20</td></tr><tr><td>21</td><td>21</td></tr><tr><td>22</td><td>22</td></tr><tr><td>23</td><td>23</td></tr><tr><td>24</td><td>24</td></tr><tr><td>25</td><td>25</td></tr><tr><td>26</td><td>26</td></tr><tr><td>27</td><td>27</td></tr><tr><td>28</td><td>28</td></tr><tr><td>29</td><td>29</td></tr><tr><td>30</td><td>30</td></tr><tr><td>31</td><td>31</td></tr><tr><td>32</td><td>32</td></tr><tr><td>33</td><td>33</td></tr><tr><td>34</td><td>34</td></tr><tr><td>35</td><td>35</td></tr><tr><td>36</td><td>36</td></tr><tr><td>37</td><td>37</td></tr><tr><td>38</td><td>38</td></tr><tr><td>39</td><td>39</td></tr><tr><td>40</td><td>40</td></tr><tr><td>41</td><td>41</td></tr><tr><td>42</td><td>42</td></tr><tr><td>43</td><td>43</td></tr><tr><td>44</td><td>44</td></tr><tr><td>45</td><td>45</td></tr><tr><td>46</td><td>46</td></tr><tr><td>47</td><td>47</td></tr><tr><td>48</td><td>48</td></tr><tr><td>49</td><td>49</td></tr><tr><td>50</td><td>50</td></tr></table> | 1 | 1                   | 2  | 2             | 3 | 3                  | 4 | 4 | 5 | 5 | 6 | 6 | 7 | 7 | 8 | 8 | 9 | 9 | 10 | 10 | 11 | 11 | 12 | 12 | 13 | 13 | 14 | 14 | 15 | 15 | 16 | 16 | 17 | 17 | 18 | 18 | 19 | 19 | 20 | 20 | 21 | 21 | 22 | 22 | 23 | 23 | 24 | 24 | 25 | 25 | 26 | 26 | 27 | 27 | 28 | 28 | 29 | 29 | 30 | 30 | 31 | 31 | 32 | 32 | 33 | 33 | 34 | 34 | 35 | 35 | 36 | 36 | 37 | 37 | 38 | 38 | 39 | 39 | 40 | 40 | 41 | 41 | 42 | 42 | 43 | 43 | 44 | 44 | 45 | 45 | 46 | 46 | 47 | 47 | 48 | 48 | 49 | 49 | 50 | 50 |
| 1  | 1                                                               |                                                                                                                                                                               |                                                                                                                                                                                                                                                                                                                                                                                                                                                                                                                                                                                                                                                                                                                                                                                                                                                                                                                                                                                                                                                                                                                                                                                                                                                                                                                                                                                                                                                                                                                                                                                                                                                                             |   |                     |    |               |   |                    |   |   |   |   |   |   |   |   |   |   |   |   |    |    |    |    |    |    |    |    |    |    |    |    |    |    |    |    |    |    |    |    |    |    |    |    |    |    |    |    |    |    |    |    |    |    |    |    |    |    |    |    |    |    |    |    |    |    |    |    |    |    |    |    |    |    |    |    |    |    |    |    |    |    |    |    |    |    |    |    |    |    |    |    |    |    |    |    |    |    |    |    |    |    |
| 2  | 2                                                               |                                                                                                                                                                               |                                                                                                                                                                                                                                                                                                                                                                                                                                                                                                                                                                                                                                                                                                                                                                                                                                                                                                                                                                                                                                                                                                                                                                                                                                                                                                                                                                                                                                                                                                                                                                                                                                                                             |   |                     |    |               |   |                    |   |   |   |   |   |   |   |   |   |   |   |   |    |    |    |    |    |    |    |    |    |    |    |    |    |    |    |    |    |    |    |    |    |    |    |    |    |    |    |    |    |    |    |    |    |    |    |    |    |    |    |    |    |    |    |    |    |    |    |    |    |    |    |    |    |    |    |    |    |    |    |    |    |    |    |    |    |    |    |    |    |    |    |    |    |    |    |    |    |    |    |    |    |    |
| 3  | 3                                                               |                                                                                                                                                                               |                                                                                                                                                                                                                                                                                                                                                                                                                                                                                                                                                                                                                                                                                                                                                                                                                                                                                                                                                                                                                                                                                                                                                                                                                                                                                                                                                                                                                                                                                                                                                                                                                                                                             |   |                     |    |               |   |                    |   |   |   |   |   |   |   |   |   |   |   |   |    |    |    |    |    |    |    |    |    |    |    |    |    |    |    |    |    |    |    |    |    |    |    |    |    |    |    |    |    |    |    |    |    |    |    |    |    |    |    |    |    |    |    |    |    |    |    |    |    |    |    |    |    |    |    |    |    |    |    |    |    |    |    |    |    |    |    |    |    |    |    |    |    |    |    |    |    |    |    |    |    |    |
| 4  | 4                                                               |                                                                                                                                                                               |                                                                                                                                                                                                                                                                                                                                                                                                                                                                                                                                                                                                                                                                                                                                                                                                                                                                                                                                                                                                                                                                                                                                                                                                                                                                                                                                                                                                                                                                                                                                                                                                                                                                             |   |                     |    |               |   |                    |   |   |   |   |   |   |   |   |   |   |   |   |    |    |    |    |    |    |    |    |    |    |    |    |    |    |    |    |    |    |    |    |    |    |    |    |    |    |    |    |    |    |    |    |    |    |    |    |    |    |    |    |    |    |    |    |    |    |    |    |    |    |    |    |    |    |    |    |    |    |    |    |    |    |    |    |    |    |    |    |    |    |    |    |    |    |    |    |    |    |    |    |    |    |
| 5  | 5                                                               |                                                                                                                                                                               |                                                                                                                                                                                                                                                                                                                                                                                                                                                                                                                                                                                                                                                                                                                                                                                                                                                                                                                                                                                                                                                                                                                                                                                                                                                                                                                                                                                                                                                                                                                                                                                                                                                                             |   |                     |    |               |   |                    |   |   |   |   |   |   |   |   |   |   |   |   |    |    |    |    |    |    |    |    |    |    |    |    |    |    |    |    |    |    |    |    |    |    |    |    |    |    |    |    |    |    |    |    |    |    |    |    |    |    |    |    |    |    |    |    |    |    |    |    |    |    |    |    |    |    |    |    |    |    |    |    |    |    |    |    |    |    |    |    |    |    |    |    |    |    |    |    |    |    |    |    |    |    |
| 6  | 6                                                               |                                                                                                                                                                               |                                                                                                                                                                                                                                                                                                                                                                                                                                                                                                                                                                                                                                                                                                                                                                                                                                                                                                                                                                                                                                                                                                                                                                                                                                                                                                                                                                                                                                                                                                                                                                                                                                                                             |   |                     |    |               |   |                    |   |   |   |   |   |   |   |   |   |   |   |   |    |    |    |    |    |    |    |    |    |    |    |    |    |    |    |    |    |    |    |    |    |    |    |    |    |    |    |    |    |    |    |    |    |    |    |    |    |    |    |    |    |    |    |    |    |    |    |    |    |    |    |    |    |    |    |    |    |    |    |    |    |    |    |    |    |    |    |    |    |    |    |    |    |    |    |    |    |    |    |    |    |    |
| 7  | 7                                                               |                                                                                                                                                                               |                                                                                                                                                                                                                                                                                                                                                                                                                                                                                                                                                                                                                                                                                                                                                                                                                                                                                                                                                                                                                                                                                                                                                                                                                                                                                                                                                                                                                                                                                                                                                                                                                                                                             |   |                     |    |               |   |                    |   |   |   |   |   |   |   |   |   |   |   |   |    |    |    |    |    |    |    |    |    |    |    |    |    |    |    |    |    |    |    |    |    |    |    |    |    |    |    |    |    |    |    |    |    |    |    |    |    |    |    |    |    |    |    |    |    |    |    |    |    |    |    |    |    |    |    |    |    |    |    |    |    |    |    |    |    |    |    |    |    |    |    |    |    |    |    |    |    |    |    |    |    |    |
| 8  | 8                                                               |                                                                                                                                                                               |                                                                                                                                                                                                                                                                                                                                                                                                                                                                                                                                                                                                                                                                                                                                                                                                                                                                                                                                                                                                                                                                                                                                                                                                                                                                                                                                                                                                                                                                                                                                                                                                                                                                             |   |                     |    |               |   |                    |   |   |   |   |   |   |   |   |   |   |   |   |    |    |    |    |    |    |    |    |    |    |    |    |    |    |    |    |    |    |    |    |    |    |    |    |    |    |    |    |    |    |    |    |    |    |    |    |    |    |    |    |    |    |    |    |    |    |    |    |    |    |    |    |    |    |    |    |    |    |    |    |    |    |    |    |    |    |    |    |    |    |    |    |    |    |    |    |    |    |    |    |    |    |
| 9  | 9                                                               |                                                                                                                                                                               |                                                                                                                                                                                                                                                                                                                                                                                                                                                                                                                                                                                                                                                                                                                                                                                                                                                                                                                                                                                                                                                                                                                                                                                                                                                                                                                                                                                                                                                                                                                                                                                                                                                                             |   |                     |    |               |   |                    |   |   |   |   |   |   |   |   |   |   |   |   |    |    |    |    |    |    |    |    |    |    |    |    |    |    |    |    |    |    |    |    |    |    |    |    |    |    |    |    |    |    |    |    |    |    |    |    |    |    |    |    |    |    |    |    |    |    |    |    |    |    |    |    |    |    |    |    |    |    |    |    |    |    |    |    |    |    |    |    |    |    |    |    |    |    |    |    |    |    |    |    |    |    |
| 10 | 10                                                              |                                                                                                                                                                               |                                                                                                                                                                                                                                                                                                                                                                                                                                                                                                                                                                                                                                                                                                                                                                                                                                                                                                                                                                                                                                                                                                                                                                                                                                                                                                                                                                                                                                                                                                                                                                                                                                                                             |   |                     |    |               |   |                    |   |   |   |   |   |   |   |   |   |   |   |   |    |    |    |    |    |    |    |    |    |    |    |    |    |    |    |    |    |    |    |    |    |    |    |    |    |    |    |    |    |    |    |    |    |    |    |    |    |    |    |    |    |    |    |    |    |    |    |    |    |    |    |    |    |    |    |    |    |    |    |    |    |    |    |    |    |    |    |    |    |    |    |    |    |    |    |    |    |    |    |    |    |    |
| 11 | 11                                                              |                                                                                                                                                                               |                                                                                                                                                                                                                                                                                                                                                                                                                                                                                                                                                                                                                                                                                                                                                                                                                                                                                                                                                                                                                                                                                                                                                                                                                                                                                                                                                                                                                                                                                                                                                                                                                                                                             |   |                     |    |               |   |                    |   |   |   |   |   |   |   |   |   |   |   |   |    |    |    |    |    |    |    |    |    |    |    |    |    |    |    |    |    |    |    |    |    |    |    |    |    |    |    |    |    |    |    |    |    |    |    |    |    |    |    |    |    |    |    |    |    |    |    |    |    |    |    |    |    |    |    |    |    |    |    |    |    |    |    |    |    |    |    |    |    |    |    |    |    |    |    |    |    |    |    |    |    |    |
| 12 | 12                                                              |                                                                                                                                                                               |                                                                                                                                                                                                                                                                                                                                                                                                                                                                                                                                                                                                                                                                                                                                                                                                                                                                                                                                                                                                                                                                                                                                                                                                                                                                                                                                                                                                                                                                                                                                                                                                                                                                             |   |                     |    |               |   |                    |   |   |   |   |   |   |   |   |   |   |   |   |    |    |    |    |    |    |    |    |    |    |    |    |    |    |    |    |    |    |    |    |    |    |    |    |    |    |    |    |    |    |    |    |    |    |    |    |    |    |    |    |    |    |    |    |    |    |    |    |    |    |    |    |    |    |    |    |    |    |    |    |    |    |    |    |    |    |    |    |    |    |    |    |    |    |    |    |    |    |    |    |    |    |
| 13 | 13                                                              |                                                                                                                                                                               |                                                                                                                                                                                                                                                                                                                                                                                                                                                                                                                                                                                                                                                                                                                                                                                                                                                                                                                                                                                                                                                                                                                                                                                                                                                                                                                                                                                                                                                                                                                                                                                                                                                                             |   |                     |    |               |   |                    |   |   |   |   |   |   |   |   |   |   |   |   |    |    |    |    |    |    |    |    |    |    |    |    |    |    |    |    |    |    |    |    |    |    |    |    |    |    |    |    |    |    |    |    |    |    |    |    |    |    |    |    |    |    |    |    |    |    |    |    |    |    |    |    |    |    |    |    |    |    |    |    |    |    |    |    |    |    |    |    |    |    |    |    |    |    |    |    |    |    |    |    |    |    |
| 14 | 14                                                              |                                                                                                                                                                               |                                                                                                                                                                                                                                                                                                                                                                                                                                                                                                                                                                                                                                                                                                                                                                                                                                                                                                                                                                                                                                                                                                                                                                                                                                                                                                                                                                                                                                                                                                                                                                                                                                                                             |   |                     |    |               |   |                    |   |   |   |   |   |   |   |   |   |   |   |   |    |    |    |    |    |    |    |    |    |    |    |    |    |    |    |    |    |    |    |    |    |    |    |    |    |    |    |    |    |    |    |    |    |    |    |    |    |    |    |    |    |    |    |    |    |    |    |    |    |    |    |    |    |    |    |    |    |    |    |    |    |    |    |    |    |    |    |    |    |    |    |    |    |    |    |    |    |    |    |    |    |    |
| 15 | 15                                                              |                                                                                                                                                                               |                                                                                                                                                                                                                                                                                                                                                                                                                                                                                                                                                                                                                                                                                                                                                                                                                                                                                                                                                                                                                                                                                                                                                                                                                                                                                                                                                                                                                                                                                                                                                                                                                                                                             |   |                     |    |               |   |                    |   |   |   |   |   |   |   |   |   |   |   |   |    |    |    |    |    |    |    |    |    |    |    |    |    |    |    |    |    |    |    |    |    |    |    |    |    |    |    |    |    |    |    |    |    |    |    |    |    |    |    |    |    |    |    |    |    |    |    |    |    |    |    |    |    |    |    |    |    |    |    |    |    |    |    |    |    |    |    |    |    |    |    |    |    |    |    |    |    |    |    |    |    |    |
| 16 | 16                                                              |                                                                                                                                                                               |                                                                                                                                                                                                                                                                                                                                                                                                                                                                                                                                                                                                                                                                                                                                                                                                                                                                                                                                                                                                                                                                                                                                                                                                                                                                                                                                                                                                                                                                                                                                                                                                                                                                             |   |                     |    |               |   |                    |   |   |   |   |   |   |   |   |   |   |   |   |    |    |    |    |    |    |    |    |    |    |    |    |    |    |    |    |    |    |    |    |    |    |    |    |    |    |    |    |    |    |    |    |    |    |    |    |    |    |    |    |    |    |    |    |    |    |    |    |    |    |    |    |    |    |    |    |    |    |    |    |    |    |    |    |    |    |    |    |    |    |    |    |    |    |    |    |    |    |    |    |    |    |
| 17 | 17                                                              |                                                                                                                                                                               |                                                                                                                                                                                                                                                                                                                                                                                                                                                                                                                                                                                                                                                                                                                                                                                                                                                                                                                                                                                                                                                                                                                                                                                                                                                                                                                                                                                                                                                                                                                                                                                                                                                                             |   |                     |    |               |   |                    |   |   |   |   |   |   |   |   |   |   |   |   |    |    |    |    |    |    |    |    |    |    |    |    |    |    |    |    |    |    |    |    |    |    |    |    |    |    |    |    |    |    |    |    |    |    |    |    |    |    |    |    |    |    |    |    |    |    |    |    |    |    |    |    |    |    |    |    |    |    |    |    |    |    |    |    |    |    |    |    |    |    |    |    |    |    |    |    |    |    |    |    |    |    |
| 18 | 18                                                              |                                                                                                                                                                               |                                                                                                                                                                                                                                                                                                                                                                                                                                                                                                                                                                                                                                                                                                                                                                                                                                                                                                                                                                                                                                                                                                                                                                                                                                                                                                                                                                                                                                                                                                                                                                                                                                                                             |   |                     |    |               |   |                    |   |   |   |   |   |   |   |   |   |   |   |   |    |    |    |    |    |    |    |    |    |    |    |    |    |    |    |    |    |    |    |    |    |    |    |    |    |    |    |    |    |    |    |    |    |    |    |    |    |    |    |    |    |    |    |    |    |    |    |    |    |    |    |    |    |    |    |    |    |    |    |    |    |    |    |    |    |    |    |    |    |    |    |    |    |    |    |    |    |    |    |    |    |    |
| 19 | 19                                                              |                                                                                                                                                                               |                                                                                                                                                                                                                                                                                                                                                                                                                                                                                                                                                                                                                                                                                                                                                                                                                                                                                                                                                                                                                                                                                                                                                                                                                                                                                                                                                                                                                                                                                                                                                                                                                                                                             |   |                     |    |               |   |                    |   |   |   |   |   |   |   |   |   |   |   |   |    |    |    |    |    |    |    |    |    |    |    |    |    |    |    |    |    |    |    |    |    |    |    |    |    |    |    |    |    |    |    |    |    |    |    |    |    |    |    |    |    |    |    |    |    |    |    |    |    |    |    |    |    |    |    |    |    |    |    |    |    |    |    |    |    |    |    |    |    |    |    |    |    |    |    |    |    |    |    |    |    |    |
| 20 | 20                                                              |                                                                                                                                                                               |                                                                                                                                                                                                                                                                                                                                                                                                                                                                                                                                                                                                                                                                                                                                                                                                                                                                                                                                                                                                                                                                                                                                                                                                                                                                                                                                                                                                                                                                                                                                                                                                                                                                             |   |                     |    |               |   |                    |   |   |   |   |   |   |   |   |   |   |   |   |    |    |    |    |    |    |    |    |    |    |    |    |    |    |    |    |    |    |    |    |    |    |    |    |    |    |    |    |    |    |    |    |    |    |    |    |    |    |    |    |    |    |    |    |    |    |    |    |    |    |    |    |    |    |    |    |    |    |    |    |    |    |    |    |    |    |    |    |    |    |    |    |    |    |    |    |    |    |    |    |    |    |
| 21 | 21                                                              |                                                                                                                                                                               |                                                                                                                                                                                                                                                                                                                                                                                                                                                                                                                                                                                                                                                                                                                                                                                                                                                                                                                                                                                                                                                                                                                                                                                                                                                                                                                                                                                                                                                                                                                                                                                                                                                                             |   |                     |    |               |   |                    |   |   |   |   |   |   |   |   |   |   |   |   |    |    |    |    |    |    |    |    |    |    |    |    |    |    |    |    |    |    |    |    |    |    |    |    |    |    |    |    |    |    |    |    |    |    |    |    |    |    |    |    |    |    |    |    |    |    |    |    |    |    |    |    |    |    |    |    |    |    |    |    |    |    |    |    |    |    |    |    |    |    |    |    |    |    |    |    |    |    |    |    |    |    |
| 22 | 22                                                              |                                                                                                                                                                               |                                                                                                                                                                                                                                                                                                                                                                                                                                                                                                                                                                                                                                                                                                                                                                                                                                                                                                                                                                                                                                                                                                                                                                                                                                                                                                                                                                                                                                                                                                                                                                                                                                                                             |   |                     |    |               |   |                    |   |   |   |   |   |   |   |   |   |   |   |   |    |    |    |    |    |    |    |    |    |    |    |    |    |    |    |    |    |    |    |    |    |    |    |    |    |    |    |    |    |    |    |    |    |    |    |    |    |    |    |    |    |    |    |    |    |    |    |    |    |    |    |    |    |    |    |    |    |    |    |    |    |    |    |    |    |    |    |    |    |    |    |    |    |    |    |    |    |    |    |    |    |    |
| 23 | 23                                                              |                                                                                                                                                                               |                                                                                                                                                                                                                                                                                                                                                                                                                                                                                                                                                                                                                                                                                                                                                                                                                                                                                                                                                                                                                                                                                                                                                                                                                                                                                                                                                                                                                                                                                                                                                                                                                                                                             |   |                     |    |               |   |                    |   |   |   |   |   |   |   |   |   |   |   |   |    |    |    |    |    |    |    |    |    |    |    |    |    |    |    |    |    |    |    |    |    |    |    |    |    |    |    |    |    |    |    |    |    |    |    |    |    |    |    |    |    |    |    |    |    |    |    |    |    |    |    |    |    |    |    |    |    |    |    |    |    |    |    |    |    |    |    |    |    |    |    |    |    |    |    |    |    |    |    |    |    |    |
| 24 | 24                                                              |                                                                                                                                                                               |                                                                                                                                                                                                                                                                                                                                                                                                                                                                                                                                                                                                                                                                                                                                                                                                                                                                                                                                                                                                                                                                                                                                                                                                                                                                                                                                                                                                                                                                                                                                                                                                                                                                             |   |                     |    |               |   |                    |   |   |   |   |   |   |   |   |   |   |   |   |    |    |    |    |    |    |    |    |    |    |    |    |    |    |    |    |    |    |    |    |    |    |    |    |    |    |    |    |    |    |    |    |    |    |    |    |    |    |    |    |    |    |    |    |    |    |    |    |    |    |    |    |    |    |    |    |    |    |    |    |    |    |    |    |    |    |    |    |    |    |    |    |    |    |    |    |    |    |    |    |    |    |
| 25 | 25                                                              |                                                                                                                                                                               |                                                                                                                                                                                                                                                                                                                                                                                                                                                                                                                                                                                                                                                                                                                                                                                                                                                                                                                                                                                                                                                                                                                                                                                                                                                                                                                                                                                                                                                                                                                                                                                                                                                                             |   |                     |    |               |   |                    |   |   |   |   |   |   |   |   |   |   |   |   |    |    |    |    |    |    |    |    |    |    |    |    |    |    |    |    |    |    |    |    |    |    |    |    |    |    |    |    |    |    |    |    |    |    |    |    |    |    |    |    |    |    |    |    |    |    |    |    |    |    |    |    |    |    |    |    |    |    |    |    |    |    |    |    |    |    |    |    |    |    |    |    |    |    |    |    |    |    |    |    |    |    |
| 26 | 26                                                              |                                                                                                                                                                               |                                                                                                                                                                                                                                                                                                                                                                                                                                                                                                                                                                                                                                                                                                                                                                                                                                                                                                                                                                                                                                                                                                                                                                                                                                                                                                                                                                                                                                                                                                                                                                                                                                                                             |   |                     |    |               |   |                    |   |   |   |   |   |   |   |   |   |   |   |   |    |    |    |    |    |    |    |    |    |    |    |    |    |    |    |    |    |    |    |    |    |    |    |    |    |    |    |    |    |    |    |    |    |    |    |    |    |    |    |    |    |    |    |    |    |    |    |    |    |    |    |    |    |    |    |    |    |    |    |    |    |    |    |    |    |    |    |    |    |    |    |    |    |    |    |    |    |    |    |    |    |    |
| 27 | 27                                                              |                                                                                                                                                                               |                                                                                                                                                                                                                                                                                                                                                                                                                                                                                                                                                                                                                                                                                                                                                                                                                                                                                                                                                                                                                                                                                                                                                                                                                                                                                                                                                                                                                                                                                                                                                                                                                                                                             |   |                     |    |               |   |                    |   |   |   |   |   |   |   |   |   |   |   |   |    |    |    |    |    |    |    |    |    |    |    |    |    |    |    |    |    |    |    |    |    |    |    |    |    |    |    |    |    |    |    |    |    |    |    |    |    |    |    |    |    |    |    |    |    |    |    |    |    |    |    |    |    |    |    |    |    |    |    |    |    |    |    |    |    |    |    |    |    |    |    |    |    |    |    |    |    |    |    |    |    |    |
| 28 | 28                                                              |                                                                                                                                                                               |                                                                                                                                                                                                                                                                                                                                                                                                                                                                                                                                                                                                                                                                                                                                                                                                                                                                                                                                                                                                                                                                                                                                                                                                                                                                                                                                                                                                                                                                                                                                                                                                                                                                             |   |                     |    |               |   |                    |   |   |   |   |   |   |   |   |   |   |   |   |    |    |    |    |    |    |    |    |    |    |    |    |    |    |    |    |    |    |    |    |    |    |    |    |    |    |    |    |    |    |    |    |    |    |    |    |    |    |    |    |    |    |    |    |    |    |    |    |    |    |    |    |    |    |    |    |    |    |    |    |    |    |    |    |    |    |    |    |    |    |    |    |    |    |    |    |    |    |    |    |    |    |
| 29 | 29                                                              |                                                                                                                                                                               |                                                                                                                                                                                                                                                                                                                                                                                                                                                                                                                                                                                                                                                                                                                                                                                                                                                                                                                                                                                                                                                                                                                                                                                                                                                                                                                                                                                                                                                                                                                                                                                                                                                                             |   |                     |    |               |   |                    |   |   |   |   |   |   |   |   |   |   |   |   |    |    |    |    |    |    |    |    |    |    |    |    |    |    |    |    |    |    |    |    |    |    |    |    |    |    |    |    |    |    |    |    |    |    |    |    |    |    |    |    |    |    |    |    |    |    |    |    |    |    |    |    |    |    |    |    |    |    |    |    |    |    |    |    |    |    |    |    |    |    |    |    |    |    |    |    |    |    |    |    |    |    |
| 30 | 30                                                              |                                                                                                                                                                               |                                                                                                                                                                                                                                                                                                                                                                                                                                                                                                                                                                                                                                                                                                                                                                                                                                                                                                                                                                                                                                                                                                                                                                                                                                                                                                                                                                                                                                                                                                                                                                                                                                                                             |   |                     |    |               |   |                    |   |   |   |   |   |   |   |   |   |   |   |   |    |    |    |    |    |    |    |    |    |    |    |    |    |    |    |    |    |    |    |    |    |    |    |    |    |    |    |    |    |    |    |    |    |    |    |    |    |    |    |    |    |    |    |    |    |    |    |    |    |    |    |    |    |    |    |    |    |    |    |    |    |    |    |    |    |    |    |    |    |    |    |    |    |    |    |    |    |    |    |    |    |    |
| 31 | 31                                                              |                                                                                                                                                                               |                                                                                                                                                                                                                                                                                                                                                                                                                                                                                                                                                                                                                                                                                                                                                                                                                                                                                                                                                                                                                                                                                                                                                                                                                                                                                                                                                                                                                                                                                                                                                                                                                                                                             |   |                     |    |               |   |                    |   |   |   |   |   |   |   |   |   |   |   |   |    |    |    |    |    |    |    |    |    |    |    |    |    |    |    |    |    |    |    |    |    |    |    |    |    |    |    |    |    |    |    |    |    |    |    |    |    |    |    |    |    |    |    |    |    |    |    |    |    |    |    |    |    |    |    |    |    |    |    |    |    |    |    |    |    |    |    |    |    |    |    |    |    |    |    |    |    |    |    |    |    |    |
| 32 | 32                                                              |                                                                                                                                                                               |                                                                                                                                                                                                                                                                                                                                                                                                                                                                                                                                                                                                                                                                                                                                                                                                                                                                                                                                                                                                                                                                                                                                                                                                                                                                                                                                                                                                                                                                                                                                                                                                                                                                             |   |                     |    |               |   |                    |   |   |   |   |   |   |   |   |   |   |   |   |    |    |    |    |    |    |    |    |    |    |    |    |    |    |    |    |    |    |    |    |    |    |    |    |    |    |    |    |    |    |    |    |    |    |    |    |    |    |    |    |    |    |    |    |    |    |    |    |    |    |    |    |    |    |    |    |    |    |    |    |    |    |    |    |    |    |    |    |    |    |    |    |    |    |    |    |    |    |    |    |    |    |
| 33 | 33                                                              |                                                                                                                                                                               |                                                                                                                                                                                                                                                                                                                                                                                                                                                                                                                                                                                                                                                                                                                                                                                                                                                                                                                                                                                                                                                                                                                                                                                                                                                                                                                                                                                                                                                                                                                                                                                                                                                                             |   |                     |    |               |   |                    |   |   |   |   |   |   |   |   |   |   |   |   |    |    |    |    |    |    |    |    |    |    |    |    |    |    |    |    |    |    |    |    |    |    |    |    |    |    |    |    |    |    |    |    |    |    |    |    |    |    |    |    |    |    |    |    |    |    |    |    |    |    |    |    |    |    |    |    |    |    |    |    |    |    |    |    |    |    |    |    |    |    |    |    |    |    |    |    |    |    |    |    |    |    |
| 34 | 34                                                              |                                                                                                                                                                               |                                                                                                                                                                                                                                                                                                                                                                                                                                                                                                                                                                                                                                                                                                                                                                                                                                                                                                                                                                                                                                                                                                                                                                                                                                                                                                                                                                                                                                                                                                                                                                                                                                                                             |   |                     |    |               |   |                    |   |   |   |   |   |   |   |   |   |   |   |   |    |    |    |    |    |    |    |    |    |    |    |    |    |    |    |    |    |    |    |    |    |    |    |    |    |    |    |    |    |    |    |    |    |    |    |    |    |    |    |    |    |    |    |    |    |    |    |    |    |    |    |    |    |    |    |    |    |    |    |    |    |    |    |    |    |    |    |    |    |    |    |    |    |    |    |    |    |    |    |    |    |    |
| 35 | 35                                                              |                                                                                                                                                                               |                                                                                                                                                                                                                                                                                                                                                                                                                                                                                                                                                                                                                                                                                                                                                                                                                                                                                                                                                                                                                                                                                                                                                                                                                                                                                                                                                                                                                                                                                                                                                                                                                                                                             |   |                     |    |               |   |                    |   |   |   |   |   |   |   |   |   |   |   |   |    |    |    |    |    |    |    |    |    |    |    |    |    |    |    |    |    |    |    |    |    |    |    |    |    |    |    |    |    |    |    |    |    |    |    |    |    |    |    |    |    |    |    |    |    |    |    |    |    |    |    |    |    |    |    |    |    |    |    |    |    |    |    |    |    |    |    |    |    |    |    |    |    |    |    |    |    |    |    |    |    |    |
| 36 | 36                                                              |                                                                                                                                                                               |                                                                                                                                                                                                                                                                                                                                                                                                                                                                                                                                                                                                                                                                                                                                                                                                                                                                                                                                                                                                                                                                                                                                                                                                                                                                                                                                                                                                                                                                                                                                                                                                                                                                             |   |                     |    |               |   |                    |   |   |   |   |   |   |   |   |   |   |   |   |    |    |    |    |    |    |    |    |    |    |    |    |    |    |    |    |    |    |    |    |    |    |    |    |    |    |    |    |    |    |    |    |    |    |    |    |    |    |    |    |    |    |    |    |    |    |    |    |    |    |    |    |    |    |    |    |    |    |    |    |    |    |    |    |    |    |    |    |    |    |    |    |    |    |    |    |    |    |    |    |    |    |
| 37 | 37                                                              |                                                                                                                                                                               |                                                                                                                                                                                                                                                                                                                                                                                                                                                                                                                                                                                                                                                                                                                                                                                                                                                                                                                                                                                                                                                                                                                                                                                                                                                                                                                                                                                                                                                                                                                                                                                                                                                                             |   |                     |    |               |   |                    |   |   |   |   |   |   |   |   |   |   |   |   |    |    |    |    |    |    |    |    |    |    |    |    |    |    |    |    |    |    |    |    |    |    |    |    |    |    |    |    |    |    |    |    |    |    |    |    |    |    |    |    |    |    |    |    |    |    |    |    |    |    |    |    |    |    |    |    |    |    |    |    |    |    |    |    |    |    |    |    |    |    |    |    |    |    |    |    |    |    |    |    |    |    |
| 38 | 38                                                              |                                                                                                                                                                               |                                                                                                                                                                                                                                                                                                                                                                                                                                                                                                                                                                                                                                                                                                                                                                                                                                                                                                                                                                                                                                                                                                                                                                                                                                                                                                                                                                                                                                                                                                                                                                                                                                                                             |   |                     |    |               |   |                    |   |   |   |   |   |   |   |   |   |   |   |   |    |    |    |    |    |    |    |    |    |    |    |    |    |    |    |    |    |    |    |    |    |    |    |    |    |    |    |    |    |    |    |    |    |    |    |    |    |    |    |    |    |    |    |    |    |    |    |    |    |    |    |    |    |    |    |    |    |    |    |    |    |    |    |    |    |    |    |    |    |    |    |    |    |    |    |    |    |    |    |    |    |    |
| 39 | 39                                                              |                                                                                                                                                                               |                                                                                                                                                                                                                                                                                                                                                                                                                                                                                                                                                                                                                                                                                                                                                                                                                                                                                                                                                                                                                                                                                                                                                                                                                                                                                                                                                                                                                                                                                                                                                                                                                                                                             |   |                     |    |               |   |                    |   |   |   |   |   |   |   |   |   |   |   |   |    |    |    |    |    |    |    |    |    |    |    |    |    |    |    |    |    |    |    |    |    |    |    |    |    |    |    |    |    |    |    |    |    |    |    |    |    |    |    |    |    |    |    |    |    |    |    |    |    |    |    |    |    |    |    |    |    |    |    |    |    |    |    |    |    |    |    |    |    |    |    |    |    |    |    |    |    |    |    |    |    |    |
| 40 | 40                                                              |                                                                                                                                                                               |                                                                                                                                                                                                                                                                                                                                                                                                                                                                                                                                                                                                                                                                                                                                                                                                                                                                                                                                                                                                                                                                                                                                                                                                                                                                                                                                                                                                                                                                                                                                                                                                                                                                             |   |                     |    |               |   |                    |   |   |   |   |   |   |   |   |   |   |   |   |    |    |    |    |    |    |    |    |    |    |    |    |    |    |    |    |    |    |    |    |    |    |    |    |    |    |    |    |    |    |    |    |    |    |    |    |    |    |    |    |    |    |    |    |    |    |    |    |    |    |    |    |    |    |    |    |    |    |    |    |    |    |    |    |    |    |    |    |    |    |    |    |    |    |    |    |    |    |    |    |    |    |
| 41 | 41                                                              |                                                                                                                                                                               |                                                                                                                                                                                                                                                                                                                                                                                                                                                                                                                                                                                                                                                                                                                                                                                                                                                                                                                                                                                                                                                                                                                                                                                                                                                                                                                                                                                                                                                                                                                                                                                                                                                                             |   |                     |    |               |   |                    |   |   |   |   |   |   |   |   |   |   |   |   |    |    |    |    |    |    |    |    |    |    |    |    |    |    |    |    |    |    |    |    |    |    |    |    |    |    |    |    |    |    |    |    |    |    |    |    |    |    |    |    |    |    |    |    |    |    |    |    |    |    |    |    |    |    |    |    |    |    |    |    |    |    |    |    |    |    |    |    |    |    |    |    |    |    |    |    |    |    |    |    |    |    |
| 42 | 42                                                              |                                                                                                                                                                               |                                                                                                                                                                                                                                                                                                                                                                                                                                                                                                                                                                                                                                                                                                                                                                                                                                                                                                                                                                                                                                                                                                                                                                                                                                                                                                                                                                                                                                                                                                                                                                                                                                                                             |   |                     |    |               |   |                    |   |   |   |   |   |   |   |   |   |   |   |   |    |    |    |    |    |    |    |    |    |    |    |    |    |    |    |    |    |    |    |    |    |    |    |    |    |    |    |    |    |    |    |    |    |    |    |    |    |    |    |    |    |    |    |    |    |    |    |    |    |    |    |    |    |    |    |    |    |    |    |    |    |    |    |    |    |    |    |    |    |    |    |    |    |    |    |    |    |    |    |    |    |    |
| 43 | 43                                                              |                                                                                                                                                                               |                                                                                                                                                                                                                                                                                                                                                                                                                                                                                                                                                                                                                                                                                                                                                                                                                                                                                                                                                                                                                                                                                                                                                                                                                                                                                                                                                                                                                                                                                                                                                                                                                                                                             |   |                     |    |               |   |                    |   |   |   |   |   |   |   |   |   |   |   |   |    |    |    |    |    |    |    |    |    |    |    |    |    |    |    |    |    |    |    |    |    |    |    |    |    |    |    |    |    |    |    |    |    |    |    |    |    |    |    |    |    |    |    |    |    |    |    |    |    |    |    |    |    |    |    |    |    |    |    |    |    |    |    |    |    |    |    |    |    |    |    |    |    |    |    |    |    |    |    |    |    |    |
| 44 | 44                                                              |                                                                                                                                                                               |                                                                                                                                                                                                                                                                                                                                                                                                                                                                                                                                                                                                                                                                                                                                                                                                                                                                                                                                                                                                                                                                                                                                                                                                                                                                                                                                                                                                                                                                                                                                                                                                                                                                             |   |                     |    |               |   |                    |   |   |   |   |   |   |   |   |   |   |   |   |    |    |    |    |    |    |    |    |    |    |    |    |    |    |    |    |    |    |    |    |    |    |    |    |    |    |    |    |    |    |    |    |    |    |    |    |    |    |    |    |    |    |    |    |    |    |    |    |    |    |    |    |    |    |    |    |    |    |    |    |    |    |    |    |    |    |    |    |    |    |    |    |    |    |    |    |    |    |    |    |    |    |
| 45 | 45                                                              |                                                                                                                                                                               |                                                                                                                                                                                                                                                                                                                                                                                                                                                                                                                                                                                                                                                                                                                                                                                                                                                                                                                                                                                                                                                                                                                                                                                                                                                                                                                                                                                                                                                                                                                                                                                                                                                                             |   |                     |    |               |   |                    |   |   |   |   |   |   |   |   |   |   |   |   |    |    |    |    |    |    |    |    |    |    |    |    |    |    |    |    |    |    |    |    |    |    |    |    |    |    |    |    |    |    |    |    |    |    |    |    |    |    |    |    |    |    |    |    |    |    |    |    |    |    |    |    |    |    |    |    |    |    |    |    |    |    |    |    |    |    |    |    |    |    |    |    |    |    |    |    |    |    |    |    |    |    |
| 46 | 46                                                              |                                                                                                                                                                               |                                                                                                                                                                                                                                                                                                                                                                                                                                                                                                                                                                                                                                                                                                                                                                                                                                                                                                                                                                                                                                                                                                                                                                                                                                                                                                                                                                                                                                                                                                                                                                                                                                                                             |   |                     |    |               |   |                    |   |   |   |   |   |   |   |   |   |   |   |   |    |    |    |    |    |    |    |    |    |    |    |    |    |    |    |    |    |    |    |    |    |    |    |    |    |    |    |    |    |    |    |    |    |    |    |    |    |    |    |    |    |    |    |    |    |    |    |    |    |    |    |    |    |    |    |    |    |    |    |    |    |    |    |    |    |    |    |    |    |    |    |    |    |    |    |    |    |    |    |    |    |    |
| 47 | 47                                                              |                                                                                                                                                                               |                                                                                                                                                                                                                                                                                                                                                                                                                                                                                                                                                                                                                                                                                                                                                                                                                                                                                                                                                                                                                                                                                                                                                                                                                                                                                                                                                                                                                                                                                                                                                                                                                                                                             |   |                     |    |               |   |                    |   |   |   |   |   |   |   |   |   |   |   |   |    |    |    |    |    |    |    |    |    |    |    |    |    |    |    |    |    |    |    |    |    |    |    |    |    |    |    |    |    |    |    |    |    |    |    |    |    |    |    |    |    |    |    |    |    |    |    |    |    |    |    |    |    |    |    |    |    |    |    |    |    |    |    |    |    |    |    |    |    |    |    |    |    |    |    |    |    |    |    |    |    |    |
| 48 | 48                                                              |                                                                                                                                                                               |                                                                                                                                                                                                                                                                                                                                                                                                                                                                                                                                                                                                                                                                                                                                                                                                                                                                                                                                                                                                                                                                                                                                                                                                                                                                                                                                                                                                                                                                                                                                                                                                                                                                             |   |                     |    |               |   |                    |   |   |   |   |   |   |   |   |   |   |   |   |    |    |    |    |    |    |    |    |    |    |    |    |    |    |    |    |    |    |    |    |    |    |    |    |    |    |    |    |    |    |    |    |    |    |    |    |    |    |    |    |    |    |    |    |    |    |    |    |    |    |    |    |    |    |    |    |    |    |    |    |    |    |    |    |    |    |    |    |    |    |    |    |    |    |    |    |    |    |    |    |    |    |
| 49 | 49                                                              |                                                                                                                                                                               |                                                                                                                                                                                                                                                                                                                                                                                                                                                                                                                                                                                                                                                                                                                                                                                                                                                                                                                                                                                                                                                                                                                                                                                                                                                                                                                                                                                                                                                                                                                                                                                                                                                                             |   |                     |    |               |   |                    |   |   |   |   |   |   |   |   |   |   |   |   |    |    |    |    |    |    |    |    |    |    |    |    |    |    |    |    |    |    |    |    |    |    |    |    |    |    |    |    |    |    |    |    |    |    |    |    |    |    |    |    |    |    |    |    |    |    |    |    |    |    |    |    |    |    |    |    |    |    |    |    |    |    |    |    |    |    |    |    |    |    |    |    |    |    |    |    |    |    |    |    |    |    |
| 50 | 50                                                              |                                                                                                                                                                               |                                                                                                                                                                                                                                                                                                                                                                                                                                                                                                                                                                                                                                                                                                                                                                                                                                                                                                                                                                                                                                                                                                                                                                                                                                                                                                                                                                                                                                                                                                                                                                                                                                                                             |   |                     |    |               |   |                    |   |   |   |   |   |   |   |   |   |   |   |   |    |    |    |    |    |    |    |    |    |    |    |    |    |    |    |    |    |    |    |    |    |    |    |    |    |    |    |    |    |    |    |    |    |    |    |    |    |    |    |    |    |    |    |    |    |    |    |    |    |    |    |    |    |    |    |    |    |    |    |    |    |    |    |    |    |    |    |    |    |    |    |    |    |    |    |    |    |    |    |    |    |    |

|    |                                                                                                                                                                                 |                                                                                                                                                                                                                                                                                                                                                                                                       |                                                                                                                                                                          |   |           |   |                    |    |       |
|----|---------------------------------------------------------------------------------------------------------------------------------------------------------------------------------|-------------------------------------------------------------------------------------------------------------------------------------------------------------------------------------------------------------------------------------------------------------------------------------------------------------------------------------------------------------------------------------------------------|--------------------------------------------------------------------------------------------------------------------------------------------------------------------------|---|-----------|---|--------------------|----|-------|
| 38 | mens_menopause_yn<br>Show the field ONLY if:<br>[mens_age_know] = '1' or [mens_age_know] = '99'                                                                                 | Did you already reach menopause?<br><i>Menopause is defined as minimum 12 months without menstruation in women older than 40 years.</i>                                                                                                                                                                                                                                                               | radio, Required<br><table border="1"><tr><td>1</td><td>Yes</td></tr><tr><td>0</td><td>No</td></tr></table>                                                               | 1 | Yes       | 0 | No                 |    |       |
| 1  | Yes                                                                                                                                                                             |                                                                                                                                                                                                                                                                                                                                                                                                       |                                                                                                                                                                          |   |           |   |                    |    |       |
| 0  | No                                                                                                                                                                              |                                                                                                                                                                                                                                                                                                                                                                                                       |                                                                                                                                                                          |   |           |   |                    |    |       |
| 39 | mens_menopause_nr<br>Show the field ONLY if:<br>[mens_menopause_yn] = '1' and<br>([mens_age_know] = '1' or [mens_age_know] = '99')                                              | How many years ago did you have your last menstruation?                                                                                                                                                                                                                                                                                                                                               | text (integer, Min: 1, Max: 60), Required                                                                                                                                |   |           |   |                    |    |       |
| 40 | excluded_3<br>Show the field ONLY if:<br>[mens_menopause_yn] = '1'                                                                                                              | Unfortunately, you do not fulfill required criteria for this study. Nevertheless, we thank you for your willingness and wish you all the best. Please select «submit». <b>Afterwards you can close the window.</b>                                                                                                                                                                                    | descriptive                                                                                                                                                              |   |           |   |                    |    |       |
| 41 | mens_info1<br>Show the field ONLY if:<br>[mens_menopause_yn] = '0'                                                                                                              | Following questions are to assess regularity of your menstrual cycle profile. You will be asked questions to cycle duration and period duration. If you do not know exactly how many days your cycle or period lasts, give your best estimation.<br>- cycle duration = number of days between 1st day of menstruation and 1st day of next menstruation<br>- period duration = number of days bleeding | descriptive                                                                                                                                                              |   |           |   |                    |    |       |
| 42 | mens_info2<br>Show the field ONLY if:<br>[mens_menopause_yn] = '0'                                                                                                              | Section Header: <i>current menstrual cycle profile</i><br>Following questions refer to your current period. Think about the last 12 months. If you are using hormonal contraception (pill, hormone spiral, implanon, vaginal contraceptive ring, etc.) or you are currently pregnant you will not be asked further questions about your <b>current period</b>                                         | descriptive                                                                                                                                                              |   |           |   |                    |    |       |
| 43 | mens_current_contracep_yn<br>Show the field ONLY if:<br>[mens_menopause_yn] = '0'                                                                                               | Do you currently use any hormonal contraceptive method?<br><i>E.g. pill, hormone spiral, implanon, vaginal contraceptive ring</i>                                                                                                                                                                                                                                                                     | radio, Required<br><table border="1"><tr><td>1</td><td>Yes</td></tr><tr><td>0</td><td>No</td></tr></table>                                                               | 1 | Yes       | 0 | No                 |    |       |
| 1  | Yes                                                                                                                                                                             |                                                                                                                                                                                                                                                                                                                                                                                                       |                                                                                                                                                                          |   |           |   |                    |    |       |
| 0  | No                                                                                                                                                                              |                                                                                                                                                                                                                                                                                                                                                                                                       |                                                                                                                                                                          |   |           |   |                    |    |       |
| 44 | mens_current_ss_yn<br>Show the field ONLY if:<br>[mens_menopause_yn] = '0'                                                                                                      | Are you currently pregnant or do breast-feeding?                                                                                                                                                                                                                                                                                                                                                      | radio, Required<br><table border="1"><tr><td>1</td><td>Yes</td></tr><tr><td>0</td><td>No</td></tr></table>                                                               | 1 | Yes       | 0 | No                 |    |       |
| 1  | Yes                                                                                                                                                                             |                                                                                                                                                                                                                                                                                                                                                                                                       |                                                                                                                                                                          |   |           |   |                    |    |       |
| 0  | No                                                                                                                                                                              |                                                                                                                                                                                                                                                                                                                                                                                                       |                                                                                                                                                                          |   |           |   |                    |    |       |
| 45 | mens_current_regular_yn<br>Show the field ONLY if:<br>([mens_age_know] = '1' or [mens_age_know] = '99') and [mens_menopause_yn] = '0' and [mens_current_contracep_yn] = '0' and | Is your cycle duration always more or less regular (+/- 7 days)?<br><i>E.g. cycle-duration in April 27 days, in May 33 days, difference = 6days -&gt; YES</i>                                                                                                                                                                                                                                         | radio, Required<br><table border="1"><tr><td>1</td><td>Yes</td></tr><tr><td>0</td><td>No</td></tr></table>                                                               | 1 | Yes       | 0 | No                 |    |       |
| 1  | Yes                                                                                                                                                                             |                                                                                                                                                                                                                                                                                                                                                                                                       |                                                                                                                                                                          |   |           |   |                    |    |       |
| 0  | No                                                                                                                                                                              |                                                                                                                                                                                                                                                                                                                                                                                                       |                                                                                                                                                                          |   |           |   |                    |    |       |
| 46 | mens_current_reg_cycle_nr<br>Show the field ONLY if:<br>[mens_current_regular_yn] = '1'                                                                                         | How long does your cycle last on average? [days]<br><i>Number of days between 1st day of menstruation and 1st day of next menstruation. Mean in normal population is 28days.</i>                                                                                                                                                                                                                      | text (integer, Min: 2), Required                                                                                                                                         |   |           |   |                    |    |       |
| 47 | mens_current_reg_period_nr<br>Show the field ONLY if:<br>[mens_current_regular_yn] = '1'                                                                                        | How long does your period last on average? [days]<br><i>Days you are bleeding.</i>                                                                                                                                                                                                                                                                                                                    | text (integer, Min: 1, Max: 30), Required                                                                                                                                |   |           |   |                    |    |       |
| 48 | mens_current_irreg_spec<br>Show the field ONLY if:<br>[mens_current_regular_yn] = '0'                                                                                           | In what way isn't your cycle more or less regular?                                                                                                                                                                                                                                                                                                                                                    | dropdown, Required<br><table border="1"><tr><td>1</td><td>no period</td></tr><tr><td>2</td><td>fluctuation &gt;8days</td></tr><tr><td>88</td><td>other</td></tr></table> | 1 | no period | 2 | fluctuation >8days | 88 | other |
| 1  | no period                                                                                                                                                                       |                                                                                                                                                                                                                                                                                                                                                                                                       |                                                                                                                                                                          |   |           |   |                    |    |       |
| 2  | fluctuation >8days                                                                                                                                                              |                                                                                                                                                                                                                                                                                                                                                                                                       |                                                                                                                                                                          |   |           |   |                    |    |       |
| 88 | other                                                                                                                                                                           |                                                                                                                                                                                                                                                                                                                                                                                                       |                                                                                                                                                                          |   |           |   |                    |    |       |
| 49 | mens_current_irreg_none<br>Show the field ONLY if:<br>[mens_current_irreg_spec] = '1'                                                                                           | How many months ago did you have your last menstruation? [months]<br><i>Number in months. If it is more than one year please multiply years by 12.</i>                                                                                                                                                                                                                                                | text (integer, Min: 1), Required                                                                                                                                         |   |           |   |                    |    |       |
| 50 | mens_current_irreg_min<br>Show the field ONLY if:<br>[mens_current_irreg_spec] = '2'                                                                                            | What has been your shortest cycle time during the last 12 months? [days]<br><i>Number of days between 1st day of menstruation and 1st day of next menstruation.</i>                                                                                                                                                                                                                                   | text (integer, Min: 1), Required                                                                                                                                         |   |           |   |                    |    |       |
| 51 | mens_current_irreg_max<br>Show the field ONLY if:<br>[mens_current_irreg_spec] = '2'                                                                                            | What has been your longest cycle time during the last 12 months? [days]<br><i>Number of days between 1st day of menstruation and 1st day of next menstruation.</i>                                                                                                                                                                                                                                    | text (integer, Min: 1), Required                                                                                                                                         |   |           |   |                    |    |       |
| 52 | mens_current_irreg_spec_88<br>Show the field ONLY if:<br>[mens_current_irreg_spec] = '88'                                                                                       | Other irregularities<br><i>Please specify.</i>                                                                                                                                                                                                                                                                                                                                                        | notes, Required                                                                                                                                                          |   |           |   |                    |    |       |
| 53 | mens_current_irreg_period_nr<br>Show the field ONLY if:<br>[mens_current_irreg_spec] = '2' or<br>[mens_current_irreg_spec] = '88'                                               | How long does your period last on average? [days]<br><i>Days you are bleeding.</i>                                                                                                                                                                                                                                                                                                                    | text (integer, Min: 1), Required                                                                                                                                         |   |           |   |                    |    |       |
| 54 | mens_current_irreg_cyclenr<br>Show the field ONLY if:<br>[mens_current_irreg_spec] = "2" or<br>[mens_current_irreg_spec] = "88"                                                 | How many menstrual cycles do you have on average per year?                                                                                                                                                                                                                                                                                                                                            | text (integer, Min: 2, Max: 30), Required                                                                                                                                |   |           |   |                    |    |       |

|    |                                                                                                                                    |                                                                                                                                                                                                                                                                                                                                                                                                                                                                                                                                                                                                                                              |                                                                                                                                                                                       |   |           |   |                    |    |       |
|----|------------------------------------------------------------------------------------------------------------------------------------|----------------------------------------------------------------------------------------------------------------------------------------------------------------------------------------------------------------------------------------------------------------------------------------------------------------------------------------------------------------------------------------------------------------------------------------------------------------------------------------------------------------------------------------------------------------------------------------------------------------------------------------------|---------------------------------------------------------------------------------------------------------------------------------------------------------------------------------------|---|-----------|---|--------------------|----|-------|
| 55 | mens_info3<br>Show the field ONLY if:<br>[mens_menopause_yn] = '0'                                                                 | Section Header: <i>menstrual cycle profile in the past</i><br>Following questions refer to your period in the past. Think about periods more than 12 months ago. We are interested in your natural menstrual cycle profile. Thus do not include the first year of having menstruations. Irregularities are normal in this period and should not be declared here. Also you should not include times of pregnancy, breast-feeding or hormonal contraception. If you have used hormonal contraception (pill, hormone spiral, implanon, vaginal contraceptive ring, etc.) please answer this questions for the time before you started using it | descriptive                                                                                                                                                                           |   |           |   |                    |    |       |
| 56 | mens_cycle90<br>Show the field ONLY if:<br>((mens_age_know) = '1' or [mens_age_know] = '99') and [mens_menopause_yn] = '0'         | Have you ever had a cycle duration of more than 90 days?                                                                                                                                                                                                                                                                                                                                                                                                                                                                                                                                                                                     | radio, Required<br><table border="1"> <tr> <td>1</td> <td>Yes</td> </tr> <tr> <td>0</td> <td>No</td> </tr> </table>                                                                   | 1 | Yes       | 0 | No                 |    |       |
| 1  | Yes                                                                                                                                |                                                                                                                                                                                                                                                                                                                                                                                                                                                                                                                                                                                                                                              |                                                                                                                                                                                       |   |           |   |                    |    |       |
| 0  | No                                                                                                                                 |                                                                                                                                                                                                                                                                                                                                                                                                                                                                                                                                                                                                                                              |                                                                                                                                                                                       |   |           |   |                    |    |       |
| 57 | mens_past_regular_yn<br>Show the field ONLY if:<br>((mens_age_know) = '1' or [mens_age_know] = '99') and [mens_menopause_yn] = '0' | Has your cycle duration always been more or less regular (+/- 7 days)?<br><i>E.g. cycle-duration in April 27 days, in May 33 days, difference = 6days -&gt; YES?</i>                                                                                                                                                                                                                                                                                                                                                                                                                                                                         | radio, Required<br><table border="1"> <tr> <td>1</td> <td>Yes</td> </tr> <tr> <td>0</td> <td>No</td> </tr> </table>                                                                   | 1 | Yes       | 0 | No                 |    |       |
| 1  | Yes                                                                                                                                |                                                                                                                                                                                                                                                                                                                                                                                                                                                                                                                                                                                                                                              |                                                                                                                                                                                       |   |           |   |                    |    |       |
| 0  | No                                                                                                                                 |                                                                                                                                                                                                                                                                                                                                                                                                                                                                                                                                                                                                                                              |                                                                                                                                                                                       |   |           |   |                    |    |       |
| 58 | mens_past_reg_nr<br>Show the field ONLY if:<br>[mens_current_regular_yn] = '0' and [mens_past_regular_yn] = '1'                    | For how many years have your cycle duration been regular? [years]<br><i>A long guess is sufficient.</i>                                                                                                                                                                                                                                                                                                                                                                                                                                                                                                                                      | text (integer, Min: 1), Required                                                                                                                                                      |   |           |   |                    |    |       |
| 59 | mens_past_reg_irreg_nr<br>Show the field ONLY if:<br>[mens_current_regular_yn] = '0' and [mens_past_regular_yn] = '1'              | For how many years do you already have irregular cycle durations? [years]<br><i>A long guess is sufficient.</i>                                                                                                                                                                                                                                                                                                                                                                                                                                                                                                                              | text (integer, Min: 1), Required                                                                                                                                                      |   |           |   |                    |    |       |
| 60 | mens_past_reg_cycle_nr<br>Show the field ONLY if:<br>[mens_past_regular_yn] = '1'                                                  | How long did your cycle last on average (approx.)? [days]<br><i>Number of days between 1st day of menstruation and 1st day of next menstruation. Mean in normal population is 28days</i>                                                                                                                                                                                                                                                                                                                                                                                                                                                     | text (integer, Min: 3), Required                                                                                                                                                      |   |           |   |                    |    |       |
| 61 | mens_past_reg_period_nr<br>Show the field ONLY if:<br>[mens_past_regular_yn] = "1"                                                 | How long did your period last on average? [days]<br><i>Days you were bleeding.</i>                                                                                                                                                                                                                                                                                                                                                                                                                                                                                                                                                           | text (integer, Min: 1), Required                                                                                                                                                      |   |           |   |                    |    |       |
| 62 | mens_past_irreg_nr<br>Show the field ONLY if:<br>[mens_current_regular_yn] = '1' and [mens_past_regular_yn] = '0'                  | For how many years have you had irregular cycle durations? [years]                                                                                                                                                                                                                                                                                                                                                                                                                                                                                                                                                                           | text (integer, Min: 1), Required                                                                                                                                                      |   |           |   |                    |    |       |
| 63 | mens_past_irreg_reg_nr<br>Show the field ONLY if:<br>[mens_current_regular_yn] = '1' and [mens_past_regular_yn] = '0'              | For how many years do you now have regular cycle durations? [years]                                                                                                                                                                                                                                                                                                                                                                                                                                                                                                                                                                          | text (number, Min: 1), Required                                                                                                                                                       |   |           |   |                    |    |       |
| 64 | mens_past_irreg_spec<br>Show the field ONLY if:<br>[mens_past_regular_yn] = '0'                                                    | In what way hasn't your cycle been more or less regular?                                                                                                                                                                                                                                                                                                                                                                                                                                                                                                                                                                                     | dropdown, Required<br><table border="1"> <tr> <td>1</td> <td>no period</td> </tr> <tr> <td>2</td> <td>fluctuation &gt;8days</td> </tr> <tr> <td>88</td> <td>other</td> </tr> </table> | 1 | no period | 2 | fluctuation >8days | 88 | other |
| 1  | no period                                                                                                                          |                                                                                                                                                                                                                                                                                                                                                                                                                                                                                                                                                                                                                                              |                                                                                                                                                                                       |   |           |   |                    |    |       |
| 2  | fluctuation >8days                                                                                                                 |                                                                                                                                                                                                                                                                                                                                                                                                                                                                                                                                                                                                                                              |                                                                                                                                                                                       |   |           |   |                    |    |       |
| 88 | other                                                                                                                              |                                                                                                                                                                                                                                                                                                                                                                                                                                                                                                                                                                                                                                              |                                                                                                                                                                                       |   |           |   |                    |    |       |
| 65 | mens_past_irreg_none<br>Show the field ONLY if:<br>[mens_past_irreg_spec] = '1'                                                    | How many months ago did you have your last menstruation? [months]<br><i>Number in months. If it is more than one year please multiply years by 12.</i>                                                                                                                                                                                                                                                                                                                                                                                                                                                                                       | text (integer, Min: 1), Required                                                                                                                                                      |   |           |   |                    |    |       |
| 66 | mens_past_irreg_min<br>Show the field ONLY if:<br>[mens_past_irreg_spec] = '2'                                                     | What has been your shortest cycle time you remember? [days]<br><i>Number of days between 1st day of menstruation and 1st day of next menstruation</i>                                                                                                                                                                                                                                                                                                                                                                                                                                                                                        | text (integer, Min: 3), Required                                                                                                                                                      |   |           |   |                    |    |       |
| 67 | mens_past_irreg_max<br>Show the field ONLY if:<br>[mens_past_irreg_spec] = '2'                                                     | What has been your longest cycle time you remember? [days]<br><i>Number of days between 1st day of menstruation and 1st day of next menstruation</i>                                                                                                                                                                                                                                                                                                                                                                                                                                                                                         | text (integer, Min: 3), Required                                                                                                                                                      |   |           |   |                    |    |       |
| 68 | mens_past_irreg_spec_88<br>Show the field ONLY if:<br>[mens_past_irreg_spec] = '88'                                                | Other irregularities<br><i>Please specify.</i>                                                                                                                                                                                                                                                                                                                                                                                                                                                                                                                                                                                               | notes, Required                                                                                                                                                                       |   |           |   |                    |    |       |
| 69 | mens_past_irreg_period_nr<br>Show the field ONLY if:<br>[mens_past_irreg_spec] = '2' or [mens_past_irreg_spec] = '88'              | How long did your period last on average? [days]<br><i>Days you are bleeding.</i>                                                                                                                                                                                                                                                                                                                                                                                                                                                                                                                                                            | text (integer, Min: 1), Required                                                                                                                                                      |   |           |   |                    |    |       |
| 70 | mens_past_irreg_cyclenr<br>Show the field ONLY if:<br>[mens_past_irreg_spec] = "2" or [mens_past_irreg_spec] = "88"                | How many menstrual cycles did you have on average per year?                                                                                                                                                                                                                                                                                                                                                                                                                                                                                                                                                                                  | text (integer, Min: 2, Max: 30), Required                                                                                                                                             |   |           |   |                    |    |       |
| 71 | mens_thelarche<br>Show the field ONLY if:<br>[mens_age_know] = '2'                                                                 | Is the the onset of your breast development more than 3 years ago?                                                                                                                                                                                                                                                                                                                                                                                                                                                                                                                                                                           | radio, Required<br><table border="1"> <tr> <td>1</td> <td>Yes</td> </tr> <tr> <td>0</td> <td>No</td> </tr> </table>                                                                   | 1 | Yes       | 0 | No                 |    |       |
| 1  | Yes                                                                                                                                |                                                                                                                                                                                                                                                                                                                                                                                                                                                                                                                                                                                                                                              |                                                                                                                                                                                       |   |           |   |                    |    |       |
| 0  | No                                                                                                                                 |                                                                                                                                                                                                                                                                                                                                                                                                                                                                                                                                                                                                                                              |                                                                                                                                                                                       |   |           |   |                    |    |       |



|    |                                                                                                                                                                                                                                                                                                                                                                                                                                                                                                                                                                                                                                                                                                                                                                                                                                                                                                                                                                                                                                                                                                                                                                                  |                                                            |                                                                                                                                                                                                        |   |            |   |            |   |          |
|----|----------------------------------------------------------------------------------------------------------------------------------------------------------------------------------------------------------------------------------------------------------------------------------------------------------------------------------------------------------------------------------------------------------------------------------------------------------------------------------------------------------------------------------------------------------------------------------------------------------------------------------------------------------------------------------------------------------------------------------------------------------------------------------------------------------------------------------------------------------------------------------------------------------------------------------------------------------------------------------------------------------------------------------------------------------------------------------------------------------------------------------------------------------------------------------|------------------------------------------------------------|--------------------------------------------------------------------------------------------------------------------------------------------------------------------------------------------------------|---|------------|---|------------|---|----------|
| 72 | <p>irregular</p> <p>Show the field ONLY if:<br/>       (([mens_age_know] = '2') or ([mens_age_know] = '1' and ([mens_age_nr] = 1 or [mens_age_nr] = 2 or [mens_age_nr] = 3)) or ((([mens_age_know] = '1' and [mens_age_nr] &gt; 3) or ([mens_age_know] = '99') and (([mens_current_regular_yn] = '1' and ([mens_current_reg_cycle_nr] &lt; 21 or [mens_current_reg_cycle_nr] &gt; 35)) or ([mens_cycle90] = '1') or ([mens_current_regular_yn] = '0' and ([mens_current_irreg_spec] = '1' and [mens_current_irreg_none] &gt;= 3) or ([mens_current_irreg_spec] = '2' and ([mens_current_irreg_min] &lt; 21 or [mens_current_irreg_max] &gt; 35 or [mens_current_irreg_cyclenr] &lt; 8)) or ([mens_current_irreg_spec] = '88' and [mens_current_irreg_cyclenr] &lt; 8))) or ([mens_past_regular_yn] = '1' and ([mens_past_reg_cycle_nr] &lt; 21 or [mens_past_reg_cycle_nr] &gt; 35)) or ([mens_past_regular_yn] = '0' and ([mens_past_irreg_spec] = '1' and [mens_past_irreg_none] &gt;= 3) or ([mens_past_irreg_spec] = '2' and ([mens_past_irreg_min] &lt; 21 OR [mens_past_irreg_max] &gt; 35 or [mens_past_irreg_cyclenr] &lt; 8)) or ([mens_past_irreg_spec] = '88' and</p> | Your menstrual cycle profile is regarded irregular.        | <p>radio</p> <p>Field Annotation: @HIDDEN-SURVEY</p>                                                                                                                                                   |   |            |   |            |   |          |
| 73 | diagnosekriterien_teil_1_comple te                                                                                                                                                                                                                                                                                                                                                                                                                                                                                                                                                                                                                                                                                                                                                                                                                                                                                                                                                                                                                                                                                                                                               | <p>Section Header: <i>Form Status</i></p> <p>Complete?</p> | <p>dropdown</p> <table border="1" data-bbox="1018 929 1230 1025"> <tr> <td>0</td> <td>Incomplete</td> </tr> <tr> <td>1</td> <td>Unverified</td> </tr> <tr> <td>2</td> <td>Complete</td> </tr> </table> | 0 | Incomplete | 1 | Unverified | 2 | Complete |
| 0  | Incomplete                                                                                                                                                                                                                                                                                                                                                                                                                                                                                                                                                                                                                                                                                                                                                                                                                                                                                                                                                                                                                                                                                                                                                                       |                                                            |                                                                                                                                                                                                        |   |            |   |            |   |          |
| 1  | Unverified                                                                                                                                                                                                                                                                                                                                                                                                                                                                                                                                                                                                                                                                                                                                                                                                                                                                                                                                                                                                                                                                                                                                                                       |                                                            |                                                                                                                                                                                                        |   |            |   |            |   |          |
| 2  | Complete                                                                                                                                                                                                                                                                                                                                                                                                                                                                                                                                                                                                                                                                                                                                                                                                                                                                                                                                                                                                                                                                                                                                                                         |                                                            |                                                                                                                                                                                                        |   |            |   |            |   |          |

|                                                                                                             |                                                                                         |                                                                                                                                                                                                                                    |                                                                                                                                                                                         |   |                        |      |        |                        |         |
|-------------------------------------------------------------------------------------------------------------|-----------------------------------------------------------------------------------------|------------------------------------------------------------------------------------------------------------------------------------------------------------------------------------------------------------------------------------|-----------------------------------------------------------------------------------------------------------------------------------------------------------------------------------------|---|------------------------|------|--------|------------------------|---------|
| 74                                                                                                          | clhy_acne_yn                                                                            | <p>Section Header: <i>clinical hyperandrogenism</i></p> <p>Do you have or did you ever have acne?</p>                                                                                                                              | <p>radio, Required</p> <table border="1"> <tr><td>1</td><td>Yes</td></tr> <tr><td>0</td><td>No</td></tr> <tr><td>99</td><td>Unknown</td></tr> </table>                                  | 1 | Yes                    | 0    | No     | 99                     | Unknown |
| 1                                                                                                           | Yes                                                                                     |                                                                                                                                                                                                                                    |                                                                                                                                                                                         |   |                        |      |        |                        |         |
| 0                                                                                                           | No                                                                                      |                                                                                                                                                                                                                                    |                                                                                                                                                                                         |   |                        |      |        |                        |         |
| 99                                                                                                          | Unknown                                                                                 |                                                                                                                                                                                                                                    |                                                                                                                                                                                         |   |                        |      |        |                        |         |
| 75                                                                                                          | clhy_alopecia_yn                                                                        | <p>Do you have or did you ever have excessive hair loss?<br/><i>To answer take a look at following picture.</i></p>                                                                                                                | <p>radio, Required</p> <table border="1"> <tr><td>1</td><td>Yes</td></tr> <tr><td>0</td><td>No</td></tr> <tr><td>99</td><td>Unknown</td></tr> </table>                                  | 1 | Yes                    | 0    | No     | 99                     | Unknown |
| 1                                                                                                           | Yes                                                                                     |                                                                                                                                                                                                                                    |                                                                                                                                                                                         |   |                        |      |        |                        |         |
| 0                                                                                                           | No                                                                                      |                                                                                                                                                                                                                                    |                                                                                                                                                                                         |   |                        |      |        |                        |         |
| 99                                                                                                          | Unknown                                                                                 |                                                                                                                                                                                                                                    |                                                                                                                                                                                         |   |                        |      |        |                        |         |
| 76                                                                                                          | clhy_alopecia_pic                                                                       | <p>To illustrate "excessive hair loss" you are shown following picture with different grades of hair loss. If one of these pictures suits you please answer "YES" in the question above.</p>                                       | <p>descriptive</p>                                                                                                                                                                      |   |                        |      |        |                        |         |
| <p style="text-align: center;"><b>Type I                      Type II                      Type III</b></p> |                                                                                         |                                                                                                                                                                                                                                    |                                                                                                                                                                                         |   |                        |      |        |                        |         |
| 77                                                                                                          | <p>clhy_alopecia_quant</p> <p>Show the field ONLY if:<br/>[clhy_alopecia_yn] = '1'</p>  | <p>Take a look at the different grades of hair loss illustrated in the picture. What grade would you classify yourself?</p>                                                                                                        | <p>dropdown, Required</p> <table border="1"> <tr><td>1</td><td>Type 1</td></tr> <tr><td>2</td><td>Type 2</td></tr> <tr><td>3</td><td>Type 3</td></tr> </table>                          | 1 | Type 1                 | 2    | Type 2 | 3                      | Type 3  |
| 1                                                                                                           | Type 1                                                                                  |                                                                                                                                                                                                                                    |                                                                                                                                                                                         |   |                        |      |        |                        |         |
| 2                                                                                                           | Type 2                                                                                  |                                                                                                                                                                                                                                    |                                                                                                                                                                                         |   |                        |      |        |                        |         |
| 3                                                                                                           | Type 3                                                                                  |                                                                                                                                                                                                                                    |                                                                                                                                                                                         |   |                        |      |        |                        |         |
| 78                                                                                                          | clhy_hirsutism_yn                                                                       | <p>Do you have or did you ever have excess hair-growth compared to other women?<br/><i>To answer take a look at following picture.</i></p>                                                                                         | <p>radio, Required</p> <table border="1"> <tr><td>1</td><td>Yes</td></tr> <tr><td>0</td><td>No</td></tr> <tr><td>99</td><td>Unknown</td></tr> </table>                                  | 1 | Yes                    | 0    | No     | 99                     | Unknown |
| 1                                                                                                           | Yes                                                                                     |                                                                                                                                                                                                                                    |                                                                                                                                                                                         |   |                        |      |        |                        |         |
| 0                                                                                                           | No                                                                                      |                                                                                                                                                                                                                                    |                                                                                                                                                                                         |   |                        |      |        |                        |         |
| 99                                                                                                          | Unknown                                                                                 |                                                                                                                                                                                                                                    |                                                                                                                                                                                         |   |                        |      |        |                        |         |
| 79                                                                                                          | clhy_hirsutism_pic                                                                      | <p>To illustrate "excess hair-growth" you are shown following picture with different grades of hair-growth. If one of these pictures suits, even if it is only one body region, you please answer "YES" in the question above.</p> | <p>descriptive</p>                                                                                                                                                                      |   |                        |      |        |                        |         |
|                                                                                                             |                                                                                         |                                                                                                                                                                                                                                    |                                                                                                                                                                                         |   |                        |      |        |                        |         |
| 80                                                                                                          | <p>clhy_hirsutism_spec</p> <p>Show the field ONLY if:<br/>[clhy_hirsutism_yn] = '1'</p> | <p>What body regions are affected?</p>                                                                                                                                                                                             | <p>checkbox, Required</p> <table border="1"> <tr><td>1</td><td>clhy_hirsutism_spec__1</td><td>face</td></tr> <tr><td>2</td><td>clhy_hirsutism_spec__2</td><td>breast</td></tr> </table> | 1 | clhy_hirsutism_spec__1 | face | 2      | clhy_hirsutism_spec__2 | breast  |
| 1                                                                                                           | clhy_hirsutism_spec__1                                                                  | face                                                                                                                                                                                                                               |                                                                                                                                                                                         |   |                        |      |        |                        |         |
| 2                                                                                                           | clhy_hirsutism_spec__2                                                                  | breast                                                                                                                                                                                                                             |                                                                                                                                                                                         |   |                        |      |        |                        |         |

|    |                                                                                                |                                                                                                                                                         |                                                                                                                                                                                                                                                                                                                                                                                                                                                                                                                                                                                                                                                                                                   |   |                               |                                                 |   |                               |                                                  |    |                                |           |   |                        |       |   |                        |                                         |   |                        |                                             |    |                         |       |
|----|------------------------------------------------------------------------------------------------|---------------------------------------------------------------------------------------------------------------------------------------------------------|---------------------------------------------------------------------------------------------------------------------------------------------------------------------------------------------------------------------------------------------------------------------------------------------------------------------------------------------------------------------------------------------------------------------------------------------------------------------------------------------------------------------------------------------------------------------------------------------------------------------------------------------------------------------------------------------------|---|-------------------------------|-------------------------------------------------|---|-------------------------------|--------------------------------------------------|----|--------------------------------|-----------|---|------------------------|-------|---|------------------------|-----------------------------------------|---|------------------------|---------------------------------------------|----|-------------------------|-------|
|    |                                                                                                |                                                                                                                                                         | <table border="1"> <tr> <td>3</td> <td>clhy_hirsutism_spec__3</td> <td>upper abdomen (breast to belly button, left row</td> </tr> <tr> <td>4</td> <td>clhy_hirsutism_spec__4</td> <td>lower abdomen (belly botton to bikini line, left</td> </tr> <tr> <td>5</td> <td>clhy_hirsutism_spec__5</td> <td>upper arm</td> </tr> <tr> <td>6</td> <td>clhy_hirsutism_spec__6</td> <td>tight</td> </tr> <tr> <td>7</td> <td>clhy_hirsutism_spec__7</td> <td>upper back (neck to waist, right row 3)</td> </tr> <tr> <td>8</td> <td>clhy_hirsutism_spec__8</td> <td>lower back (waist to buttocks, right row 4)</td> </tr> <tr> <td>88</td> <td>clhy_hirsutism_spec__88</td> <td>other</td> </tr> </table> | 3 | clhy_hirsutism_spec__3        | upper abdomen (breast to belly button, left row | 4 | clhy_hirsutism_spec__4        | lower abdomen (belly botton to bikini line, left | 5  | clhy_hirsutism_spec__5         | upper arm | 6 | clhy_hirsutism_spec__6 | tight | 7 | clhy_hirsutism_spec__7 | upper back (neck to waist, right row 3) | 8 | clhy_hirsutism_spec__8 | lower back (waist to buttocks, right row 4) | 88 | clhy_hirsutism_spec__88 | other |
| 3  | clhy_hirsutism_spec__3                                                                         | upper abdomen (breast to belly button, left row                                                                                                         |                                                                                                                                                                                                                                                                                                                                                                                                                                                                                                                                                                                                                                                                                                   |   |                               |                                                 |   |                               |                                                  |    |                                |           |   |                        |       |   |                        |                                         |   |                        |                                             |    |                         |       |
| 4  | clhy_hirsutism_spec__4                                                                         | lower abdomen (belly botton to bikini line, left                                                                                                        |                                                                                                                                                                                                                                                                                                                                                                                                                                                                                                                                                                                                                                                                                                   |   |                               |                                                 |   |                               |                                                  |    |                                |           |   |                        |       |   |                        |                                         |   |                        |                                             |    |                         |       |
| 5  | clhy_hirsutism_spec__5                                                                         | upper arm                                                                                                                                               |                                                                                                                                                                                                                                                                                                                                                                                                                                                                                                                                                                                                                                                                                                   |   |                               |                                                 |   |                               |                                                  |    |                                |           |   |                        |       |   |                        |                                         |   |                        |                                             |    |                         |       |
| 6  | clhy_hirsutism_spec__6                                                                         | tight                                                                                                                                                   |                                                                                                                                                                                                                                                                                                                                                                                                                                                                                                                                                                                                                                                                                                   |   |                               |                                                 |   |                               |                                                  |    |                                |           |   |                        |       |   |                        |                                         |   |                        |                                             |    |                         |       |
| 7  | clhy_hirsutism_spec__7                                                                         | upper back (neck to waist, right row 3)                                                                                                                 |                                                                                                                                                                                                                                                                                                                                                                                                                                                                                                                                                                                                                                                                                                   |   |                               |                                                 |   |                               |                                                  |    |                                |           |   |                        |       |   |                        |                                         |   |                        |                                             |    |                         |       |
| 8  | clhy_hirsutism_spec__8                                                                         | lower back (waist to buttocks, right row 4)                                                                                                             |                                                                                                                                                                                                                                                                                                                                                                                                                                                                                                                                                                                                                                                                                                   |   |                               |                                                 |   |                               |                                                  |    |                                |           |   |                        |       |   |                        |                                         |   |                        |                                             |    |                         |       |
| 88 | clhy_hirsutism_spec__88                                                                        | other                                                                                                                                                   |                                                                                                                                                                                                                                                                                                                                                                                                                                                                                                                                                                                                                                                                                                   |   |                               |                                                 |   |                               |                                                  |    |                                |           |   |                        |       |   |                        |                                         |   |                        |                                             |    |                         |       |
| 81 | clhy_hirsutism_spec_88<br>Show the field ONLY if:<br>[clhy_hirsutism_spec(88)] = '1'           | body regions - other<br><i>Please specify.</i>                                                                                                          | notes, Required                                                                                                                                                                                                                                                                                                                                                                                                                                                                                                                                                                                                                                                                                   |   |                               |                                                 |   |                               |                                                  |    |                                |           |   |                        |       |   |                        |                                         |   |                        |                                             |    |                         |       |
| 82 | clhy_hirsutism_spec_face<br>Show the field ONLY if:<br>[clhy_hirsutism_spec(1)] = '1'          | Where in your face?                                                                                                                                     | checkbox, Required<br><table border="1"> <tr> <td>1</td> <td>clhy_hirsutism_spec_face<br/>1</td> <td>upper lips</td> </tr> <tr> <td>2</td> <td>clhy_hirsutism_spec_face<br/>2</td> <td>chin</td> </tr> <tr> <td>88</td> <td>clhy_hirsutism_spec_face<br/>88</td> <td>other</td> </tr> </table>                                                                                                                                                                                                                                                                                                                                                                                                    | 1 | clhy_hirsutism_spec_face<br>1 | upper lips                                      | 2 | clhy_hirsutism_spec_face<br>2 | chin                                             | 88 | clhy_hirsutism_spec_face<br>88 | other     |   |                        |       |   |                        |                                         |   |                        |                                             |    |                         |       |
| 1  | clhy_hirsutism_spec_face<br>1                                                                  | upper lips                                                                                                                                              |                                                                                                                                                                                                                                                                                                                                                                                                                                                                                                                                                                                                                                                                                                   |   |                               |                                                 |   |                               |                                                  |    |                                |           |   |                        |       |   |                        |                                         |   |                        |                                             |    |                         |       |
| 2  | clhy_hirsutism_spec_face<br>2                                                                  | chin                                                                                                                                                    |                                                                                                                                                                                                                                                                                                                                                                                                                                                                                                                                                                                                                                                                                                   |   |                               |                                                 |   |                               |                                                  |    |                                |           |   |                        |       |   |                        |                                         |   |                        |                                             |    |                         |       |
| 88 | clhy_hirsutism_spec_face<br>88                                                                 | other                                                                                                                                                   |                                                                                                                                                                                                                                                                                                                                                                                                                                                                                                                                                                                                                                                                                                   |   |                               |                                                 |   |                               |                                                  |    |                                |           |   |                        |       |   |                        |                                         |   |                        |                                             |    |                         |       |
| 83 | clhy_hirsutism_spec_face_88<br>Show the field ONLY if:<br>[clhy_hirsutism_spec_face(88)] = '1' | face - other<br><i>Please specify.</i>                                                                                                                  | notes, Required                                                                                                                                                                                                                                                                                                                                                                                                                                                                                                                                                                                                                                                                                   |   |                               |                                                 |   |                               |                                                  |    |                                |           |   |                        |       |   |                        |                                         |   |                        |                                             |    |                         |       |
| 84 | clhy_hirsutism_quant1_1<br>Show the field ONLY if:<br>[clhy_hirsutism_spec_face(1)] = '1'      | Take a look at the different grades of hair-growth illustrated in the picture. What grade would you classify yourself regarding your upper lips?        | dropdown, Required<br><table border="1"> <tr> <td>1</td> <td>1</td> </tr> <tr> <td>2</td> <td>2</td> </tr> <tr> <td>3</td> <td>3</td> </tr> <tr> <td>4</td> <td>4</td> </tr> </table>                                                                                                                                                                                                                                                                                                                                                                                                                                                                                                             | 1 | 1                             | 2                                               | 2 | 3                             | 3                                                | 4  | 4                              |           |   |                        |       |   |                        |                                         |   |                        |                                             |    |                         |       |
| 1  | 1                                                                                              |                                                                                                                                                         |                                                                                                                                                                                                                                                                                                                                                                                                                                                                                                                                                                                                                                                                                                   |   |                               |                                                 |   |                               |                                                  |    |                                |           |   |                        |       |   |                        |                                         |   |                        |                                             |    |                         |       |
| 2  | 2                                                                                              |                                                                                                                                                         |                                                                                                                                                                                                                                                                                                                                                                                                                                                                                                                                                                                                                                                                                                   |   |                               |                                                 |   |                               |                                                  |    |                                |           |   |                        |       |   |                        |                                         |   |                        |                                             |    |                         |       |
| 3  | 3                                                                                              |                                                                                                                                                         |                                                                                                                                                                                                                                                                                                                                                                                                                                                                                                                                                                                                                                                                                                   |   |                               |                                                 |   |                               |                                                  |    |                                |           |   |                        |       |   |                        |                                         |   |                        |                                             |    |                         |       |
| 4  | 4                                                                                              |                                                                                                                                                         |                                                                                                                                                                                                                                                                                                                                                                                                                                                                                                                                                                                                                                                                                                   |   |                               |                                                 |   |                               |                                                  |    |                                |           |   |                        |       |   |                        |                                         |   |                        |                                             |    |                         |       |
| 85 | clhy_hirsutism_quant1_2<br>Show the field ONLY if:<br>[clhy_hirsutism_spec_face(2)] = '1'      | Take a look at the different grades of hair-growth illustrated in the picture. What grade would you classify yourself regarding your chin?              | dropdown, Required<br><table border="1"> <tr> <td>1</td> <td>1</td> </tr> <tr> <td>2</td> <td>2</td> </tr> <tr> <td>3</td> <td>3</td> </tr> <tr> <td>4</td> <td>4</td> </tr> </table>                                                                                                                                                                                                                                                                                                                                                                                                                                                                                                             | 1 | 1                             | 2                                               | 2 | 3                             | 3                                                | 4  | 4                              |           |   |                        |       |   |                        |                                         |   |                        |                                             |    |                         |       |
| 1  | 1                                                                                              |                                                                                                                                                         |                                                                                                                                                                                                                                                                                                                                                                                                                                                                                                                                                                                                                                                                                                   |   |                               |                                                 |   |                               |                                                  |    |                                |           |   |                        |       |   |                        |                                         |   |                        |                                             |    |                         |       |
| 2  | 2                                                                                              |                                                                                                                                                         |                                                                                                                                                                                                                                                                                                                                                                                                                                                                                                                                                                                                                                                                                                   |   |                               |                                                 |   |                               |                                                  |    |                                |           |   |                        |       |   |                        |                                         |   |                        |                                             |    |                         |       |
| 3  | 3                                                                                              |                                                                                                                                                         |                                                                                                                                                                                                                                                                                                                                                                                                                                                                                                                                                                                                                                                                                                   |   |                               |                                                 |   |                               |                                                  |    |                                |           |   |                        |       |   |                        |                                         |   |                        |                                             |    |                         |       |
| 4  | 4                                                                                              |                                                                                                                                                         |                                                                                                                                                                                                                                                                                                                                                                                                                                                                                                                                                                                                                                                                                                   |   |                               |                                                 |   |                               |                                                  |    |                                |           |   |                        |       |   |                        |                                         |   |                        |                                             |    |                         |       |
| 86 | clhy_hirsutism_quant1_88<br>Show the field ONLY if:<br>[clhy_hirsutism_spec_face(88)] = '1'    | Take a look at the different grades of hair-growth illustrated in the picture. What grade would you classify yourself regarding your other face-region? | dropdown, Required<br><table border="1"> <tr> <td>1</td> <td>1</td> </tr> <tr> <td>2</td> <td>2</td> </tr> <tr> <td>3</td> <td>3</td> </tr> <tr> <td>4</td> <td>4</td> </tr> </table>                                                                                                                                                                                                                                                                                                                                                                                                                                                                                                             | 1 | 1                             | 2                                               | 2 | 3                             | 3                                                | 4  | 4                              |           |   |                        |       |   |                        |                                         |   |                        |                                             |    |                         |       |
| 1  | 1                                                                                              |                                                                                                                                                         |                                                                                                                                                                                                                                                                                                                                                                                                                                                                                                                                                                                                                                                                                                   |   |                               |                                                 |   |                               |                                                  |    |                                |           |   |                        |       |   |                        |                                         |   |                        |                                             |    |                         |       |
| 2  | 2                                                                                              |                                                                                                                                                         |                                                                                                                                                                                                                                                                                                                                                                                                                                                                                                                                                                                                                                                                                                   |   |                               |                                                 |   |                               |                                                  |    |                                |           |   |                        |       |   |                        |                                         |   |                        |                                             |    |                         |       |
| 3  | 3                                                                                              |                                                                                                                                                         |                                                                                                                                                                                                                                                                                                                                                                                                                                                                                                                                                                                                                                                                                                   |   |                               |                                                 |   |                               |                                                  |    |                                |           |   |                        |       |   |                        |                                         |   |                        |                                             |    |                         |       |
| 4  | 4                                                                                              |                                                                                                                                                         |                                                                                                                                                                                                                                                                                                                                                                                                                                                                                                                                                                                                                                                                                                   |   |                               |                                                 |   |                               |                                                  |    |                                |           |   |                        |       |   |                        |                                         |   |                        |                                             |    |                         |       |
| 87 | clhy_hirsutism_quant2<br>Show the field ONLY if:<br>[clhy_hirsutism_spec(2)] = '1'             | Take a look at the different grades of hair-growth illustrated in the picture. What grade would you classify yourself regarding your breast?            | dropdown, Required<br><table border="1"> <tr> <td>1</td> <td>1</td> </tr> <tr> <td>2</td> <td>2</td> </tr> <tr> <td>3</td> <td>3</td> </tr> <tr> <td>4</td> <td>4</td> </tr> </table>                                                                                                                                                                                                                                                                                                                                                                                                                                                                                                             | 1 | 1                             | 2                                               | 2 | 3                             | 3                                                | 4  | 4                              |           |   |                        |       |   |                        |                                         |   |                        |                                             |    |                         |       |
| 1  | 1                                                                                              |                                                                                                                                                         |                                                                                                                                                                                                                                                                                                                                                                                                                                                                                                                                                                                                                                                                                                   |   |                               |                                                 |   |                               |                                                  |    |                                |           |   |                        |       |   |                        |                                         |   |                        |                                             |    |                         |       |
| 2  | 2                                                                                              |                                                                                                                                                         |                                                                                                                                                                                                                                                                                                                                                                                                                                                                                                                                                                                                                                                                                                   |   |                               |                                                 |   |                               |                                                  |    |                                |           |   |                        |       |   |                        |                                         |   |                        |                                             |    |                         |       |
| 3  | 3                                                                                              |                                                                                                                                                         |                                                                                                                                                                                                                                                                                                                                                                                                                                                                                                                                                                                                                                                                                                   |   |                               |                                                 |   |                               |                                                  |    |                                |           |   |                        |       |   |                        |                                         |   |                        |                                             |    |                         |       |
| 4  | 4                                                                                              |                                                                                                                                                         |                                                                                                                                                                                                                                                                                                                                                                                                                                                                                                                                                                                                                                                                                                   |   |                               |                                                 |   |                               |                                                  |    |                                |           |   |                        |       |   |                        |                                         |   |                        |                                             |    |                         |       |
| 88 | clhy_hirsutism_quant3<br>Show the field ONLY if:<br>[clhy_hirsutism_spec(3)] = '1'             | Take a look at the different grades of hair-growth illustrated in the picture. What grade would you classify yourself regarding your upper abdomen?     | dropdown, Required<br><table border="1"> <tr> <td>1</td> <td>1</td> </tr> <tr> <td>2</td> <td>2</td> </tr> <tr> <td>3</td> <td>3</td> </tr> <tr> <td>4</td> <td>4</td> </tr> </table>                                                                                                                                                                                                                                                                                                                                                                                                                                                                                                             | 1 | 1                             | 2                                               | 2 | 3                             | 3                                                | 4  | 4                              |           |   |                        |       |   |                        |                                         |   |                        |                                             |    |                         |       |
| 1  | 1                                                                                              |                                                                                                                                                         |                                                                                                                                                                                                                                                                                                                                                                                                                                                                                                                                                                                                                                                                                                   |   |                               |                                                 |   |                               |                                                  |    |                                |           |   |                        |       |   |                        |                                         |   |                        |                                             |    |                         |       |
| 2  | 2                                                                                              |                                                                                                                                                         |                                                                                                                                                                                                                                                                                                                                                                                                                                                                                                                                                                                                                                                                                                   |   |                               |                                                 |   |                               |                                                  |    |                                |           |   |                        |       |   |                        |                                         |   |                        |                                             |    |                         |       |
| 3  | 3                                                                                              |                                                                                                                                                         |                                                                                                                                                                                                                                                                                                                                                                                                                                                                                                                                                                                                                                                                                                   |   |                               |                                                 |   |                               |                                                  |    |                                |           |   |                        |       |   |                        |                                         |   |                        |                                             |    |                         |       |
| 4  | 4                                                                                              |                                                                                                                                                         |                                                                                                                                                                                                                                                                                                                                                                                                                                                                                                                                                                                                                                                                                                   |   |                               |                                                 |   |                               |                                                  |    |                                |           |   |                        |       |   |                        |                                         |   |                        |                                             |    |                         |       |
| 89 | clhy_hirsutism_quant4<br>Show the field ONLY if:<br>[clhy_hirsutism_spec(4)] = '1'             | Take a look at the different grades of hair-growth illustrated in the picture. What grade would you classify yourself regarding your lower abdomen?     | dropdown, Required<br><table border="1"> <tr> <td>1</td> <td>1</td> </tr> <tr> <td>2</td> <td>2</td> </tr> <tr> <td>3</td> <td>3</td> </tr> <tr> <td>4</td> <td>4</td> </tr> </table>                                                                                                                                                                                                                                                                                                                                                                                                                                                                                                             | 1 | 1                             | 2                                               | 2 | 3                             | 3                                                | 4  | 4                              |           |   |                        |       |   |                        |                                         |   |                        |                                             |    |                         |       |
| 1  | 1                                                                                              |                                                                                                                                                         |                                                                                                                                                                                                                                                                                                                                                                                                                                                                                                                                                                                                                                                                                                   |   |                               |                                                 |   |                               |                                                  |    |                                |           |   |                        |       |   |                        |                                         |   |                        |                                             |    |                         |       |
| 2  | 2                                                                                              |                                                                                                                                                         |                                                                                                                                                                                                                                                                                                                                                                                                                                                                                                                                                                                                                                                                                                   |   |                               |                                                 |   |                               |                                                  |    |                                |           |   |                        |       |   |                        |                                         |   |                        |                                             |    |                         |       |
| 3  | 3                                                                                              |                                                                                                                                                         |                                                                                                                                                                                                                                                                                                                                                                                                                                                                                                                                                                                                                                                                                                   |   |                               |                                                 |   |                               |                                                  |    |                                |           |   |                        |       |   |                        |                                         |   |                        |                                             |    |                         |       |
| 4  | 4                                                                                              |                                                                                                                                                         |                                                                                                                                                                                                                                                                                                                                                                                                                                                                                                                                                                                                                                                                                                   |   |                               |                                                 |   |                               |                                                  |    |                                |           |   |                        |       |   |                        |                                         |   |                        |                                             |    |                         |       |
| 90 | clhy_hirsutism_quant5<br>Show the field ONLY if:<br>[clhy_hirsutism_spec(5)] = '1'             | Take a look at the different grades of hair-growth illustrated in the picture. What grade would you classify yourself regarding your upper arms?        | dropdown, Required<br><table border="1"> <tr> <td>1</td> <td>1</td> </tr> <tr> <td>2</td> <td>2</td> </tr> <tr> <td>3</td> <td>3</td> </tr> <tr> <td>4</td> <td>4</td> </tr> </table>                                                                                                                                                                                                                                                                                                                                                                                                                                                                                                             | 1 | 1                             | 2                                               | 2 | 3                             | 3                                                | 4  | 4                              |           |   |                        |       |   |                        |                                         |   |                        |                                             |    |                         |       |
| 1  | 1                                                                                              |                                                                                                                                                         |                                                                                                                                                                                                                                                                                                                                                                                                                                                                                                                                                                                                                                                                                                   |   |                               |                                                 |   |                               |                                                  |    |                                |           |   |                        |       |   |                        |                                         |   |                        |                                             |    |                         |       |
| 2  | 2                                                                                              |                                                                                                                                                         |                                                                                                                                                                                                                                                                                                                                                                                                                                                                                                                                                                                                                                                                                                   |   |                               |                                                 |   |                               |                                                  |    |                                |           |   |                        |       |   |                        |                                         |   |                        |                                             |    |                         |       |
| 3  | 3                                                                                              |                                                                                                                                                         |                                                                                                                                                                                                                                                                                                                                                                                                                                                                                                                                                                                                                                                                                                   |   |                               |                                                 |   |                               |                                                  |    |                                |           |   |                        |       |   |                        |                                         |   |                        |                                             |    |                         |       |
| 4  | 4                                                                                              |                                                                                                                                                         |                                                                                                                                                                                                                                                                                                                                                                                                                                                                                                                                                                                                                                                                                                   |   |                               |                                                 |   |                               |                                                  |    |                                |           |   |                        |       |   |                        |                                         |   |                        |                                             |    |                         |       |
| 91 | clhy_hirsutism_quant6<br>Show the field ONLY if:<br>[clhy_hirsutism_spec(6)] = '1'             | Take a look at the different grades of hair-growth illustrated in the picture. What grade would you classify yourself regarding your tights?            | dropdown, Required<br><table border="1"> <tr> <td>1</td> <td>1</td> </tr> <tr> <td>2</td> <td>2</td> </tr> <tr> <td>3</td> <td>3</td> </tr> </table>                                                                                                                                                                                                                                                                                                                                                                                                                                                                                                                                              | 1 | 1                             | 2                                               | 2 | 3                             | 3                                                |    |                                |           |   |                        |       |   |                        |                                         |   |                        |                                             |    |                         |       |
| 1  | 1                                                                                              |                                                                                                                                                         |                                                                                                                                                                                                                                                                                                                                                                                                                                                                                                                                                                                                                                                                                                   |   |                               |                                                 |   |                               |                                                  |    |                                |           |   |                        |       |   |                        |                                         |   |                        |                                             |    |                         |       |
| 2  | 2                                                                                              |                                                                                                                                                         |                                                                                                                                                                                                                                                                                                                                                                                                                                                                                                                                                                                                                                                                                                   |   |                               |                                                 |   |                               |                                                  |    |                                |           |   |                        |       |   |                        |                                         |   |                        |                                             |    |                         |       |
| 3  | 3                                                                                              |                                                                                                                                                         |                                                                                                                                                                                                                                                                                                                                                                                                                                                                                                                                                                                                                                                                                                   |   |                               |                                                 |   |                               |                                                  |    |                                |           |   |                        |       |   |                        |                                         |   |                        |                                             |    |                         |       |

|     |                                                                                                                                 |                                                                                                                                                                                                                     |                                           |              |
|-----|---------------------------------------------------------------------------------------------------------------------------------|---------------------------------------------------------------------------------------------------------------------------------------------------------------------------------------------------------------------|-------------------------------------------|--------------|
|     |                                                                                                                                 |                                                                                                                                                                                                                     | 4                                         | 4            |
| 92  | clhy_hirsutism_quant7<br>Show the field ONLY if:<br>[clhy_hirsutism_spec(7)] = '1'                                              | Take a look at the different grades of hair-growth illustrated in the picture. What grade would you classify yourself regarding your upper back?                                                                    | dropdown, Required                        |              |
|     |                                                                                                                                 |                                                                                                                                                                                                                     | 1                                         | 1            |
|     |                                                                                                                                 |                                                                                                                                                                                                                     | 2                                         | 2            |
|     |                                                                                                                                 |                                                                                                                                                                                                                     | 3                                         | 3            |
|     |                                                                                                                                 |                                                                                                                                                                                                                     | 4                                         | 4            |
| 93  | clhy_hirsutism_quant8<br>Show the field ONLY if:<br>[clhy_hirsutism_spec(8)] = '1'                                              | Take a look at the different grades of hair-growth illustrated in the picture. What grade would you classify yourself regarding your lower back?                                                                    | dropdown, Required                        |              |
|     |                                                                                                                                 |                                                                                                                                                                                                                     | 1                                         | 1            |
|     |                                                                                                                                 |                                                                                                                                                                                                                     | 2                                         | 2            |
|     |                                                                                                                                 |                                                                                                                                                                                                                     | 3                                         | 3            |
|     |                                                                                                                                 |                                                                                                                                                                                                                     | 4                                         | 4            |
| 94  | clhy_hirsutism_quant88<br>Show the field ONLY if:<br>[clhy_hirsutism_spec(88)] = '1'                                            | Take a look at the different grades of hair-growth illustrated in the picture. What grade would you classify yourself regarding your other body-region (as described)?                                              | dropdown, Required                        |              |
|     |                                                                                                                                 |                                                                                                                                                                                                                     | 1                                         | 1            |
|     |                                                                                                                                 |                                                                                                                                                                                                                     | 2                                         | 2            |
|     |                                                                                                                                 |                                                                                                                                                                                                                     | 3                                         | 3            |
|     |                                                                                                                                 |                                                                                                                                                                                                                     | 4                                         | 4            |
| 95  | cl_hyperandrogenism<br>Show the field ONLY if:<br>[clhy_acne_yn] = '1' or [clhy_alopezia_yn] = '1' or [clhy_hirsutism_yn] = '1' | clinical hyperandrogenism                                                                                                                                                                                           | radio<br>Field Annotation: @HIDDEN-SURVEY |              |
| 96  | bchy_hormone_yn                                                                                                                 | Section Header: <i>biochemical hyperandrogenism</i><br>Has there ever been done blood examination for female and male sex hormones?                                                                                 | radio, Required                           |              |
|     |                                                                                                                                 |                                                                                                                                                                                                                     | 1                                         | Yes          |
|     |                                                                                                                                 |                                                                                                                                                                                                                     | 0                                         | No           |
|     |                                                                                                                                 |                                                                                                                                                                                                                     | 99                                        | Unknown      |
| 97  | bchy_hormone_m_yn<br>Show the field ONLY if:<br>[bchy_hormone_yn] = '1'                                                         | Thus, have there been found elevated levels of male sex hormones?                                                                                                                                                   | radio, Required                           |              |
|     |                                                                                                                                 |                                                                                                                                                                                                                     | 1                                         | Yes          |
|     |                                                                                                                                 |                                                                                                                                                                                                                     | 0                                         | No           |
|     |                                                                                                                                 |                                                                                                                                                                                                                     | 99                                        | Unknown      |
| 98  | bc_hyperandrogenism<br>Show the field ONLY if:<br>[bchy_hormone_m_yn] = '1'                                                     | biochemical hyperandrogenism                                                                                                                                                                                        | radio<br>Field Annotation: @HIDDEN-SURVEY |              |
| 99  | pcom_us_yn                                                                                                                      | Section Header: <i>morphological polycystic ovaries</i><br>Has there ever been done a vaginal sonography?<br><i>For this purpose there is insertet a slender, rod-shaped receiving transducer into your vagina.</i> | radio, Required                           |              |
|     |                                                                                                                                 |                                                                                                                                                                                                                     | 1                                         | Yes          |
|     |                                                                                                                                 |                                                                                                                                                                                                                     | 0                                         | No           |
|     |                                                                                                                                 |                                                                                                                                                                                                                     | 99                                        | Unknown      |
| 100 | pcom_us_ovarien_yn<br>Show the field ONLY if:<br>[pcom_us_yn] = '1'                                                             | Thus, have there been detected an increased ovary size?                                                                                                                                                             | radio, Required                           |              |
|     |                                                                                                                                 |                                                                                                                                                                                                                     | 1                                         | Yes          |
|     |                                                                                                                                 |                                                                                                                                                                                                                     | 0                                         | No           |
|     |                                                                                                                                 |                                                                                                                                                                                                                     | 99                                        | Unknown      |
| 101 | pcom_us_cysts_yn<br>Show the field ONLY if:<br>[pcom_us_yn] = '1'                                                               | Thus, have there been detected an increased number of follicles (sometimes called cysts)?<br><i>These are "bubbles" inside the ovary that occur when immature egg cells are accumulating.</i>                       | radio, Required                           |              |
|     |                                                                                                                                 |                                                                                                                                                                                                                     | 1                                         | Yes          |
|     |                                                                                                                                 |                                                                                                                                                                                                                     | 0                                         | No           |
|     |                                                                                                                                 |                                                                                                                                                                                                                     | 99                                        | Unknown      |
| 102 | pcom<br>Show the field ONLY if:<br>[pcom_us_cysts_yn] = '1' or [pcom_us_ovarien_yn] = '1'                                       | morphological polycystic ovaries                                                                                                                                                                                    | radio<br>Field Annotation: @HIDDEN-SURVEY |              |
| 103 | pcos_diagnosis                                                                                                                  | Section Header: <i>received diagnosis</i><br>Did your gynecologist tell you that you have polycystic ovary syndrome (PCOS)?                                                                                         | radio, Required                           |              |
|     |                                                                                                                                 |                                                                                                                                                                                                                     | 1                                         | Yes          |
|     |                                                                                                                                 |                                                                                                                                                                                                                     | 0                                         | No           |
|     |                                                                                                                                 |                                                                                                                                                                                                                     | 99                                        | Unknown      |
| 104 | pcos_dd_aggs                                                                                                                    | Section Header: <i>differentialdiagnoses</i><br>Have you been diagnosed with adrenogenital syndrome?<br><i>Falls Sie nicht wissen was das ist, kreuzen sie "Nein/Unbekannt" an.</i>                                 | radio, Required                           |              |
|     |                                                                                                                                 |                                                                                                                                                                                                                     | 1                                         | Yes          |
|     |                                                                                                                                 |                                                                                                                                                                                                                     | 0                                         | No / Unknown |
| 105 | pcos_dd_prolaktinom                                                                                                             | Have you been diagnosed with a prolactinoma?<br><i>Prolactinoma is a benign tumor of the pituary gland and is producing the hormone prolactin.</i>                                                                  | radio, Required                           |              |
|     |                                                                                                                                 |                                                                                                                                                                                                                     | 1                                         | Yes          |
|     |                                                                                                                                 |                                                                                                                                                                                                                     | 0                                         | No / Unknown |

|     |                                                                                              |                                                                                                                                                                                                             |                                                                                                                                                                     |   |            |   |            |   |          |
|-----|----------------------------------------------------------------------------------------------|-------------------------------------------------------------------------------------------------------------------------------------------------------------------------------------------------------------|---------------------------------------------------------------------------------------------------------------------------------------------------------------------|---|------------|---|------------|---|----------|
| 106 | pcos_dd<br>Show the field ONLY if:<br>[pcos_dd_aggs] = '1' or [pcos_dd_prolaktinom] = '1'    | fulfill differentialdiagnosis                                                                                                                                                                               | descriptive<br>Field Annotation: @HIDDEN-SURVEY                                                                                                                     |   |            |   |            |   |          |
| 107 | excluded_4<br>Show the field ONLY if:<br>[pcos_dd_prolaktinom] = '1' or [pcos_dd_aggs] = '1' | Unfortunately, you do not fulfill required criteria for this study. Nevertheless, we thank you for your willingness and wish you all the best. Please select «submit». Afterwards you can close the window. | descriptive                                                                                                                                                         |   |            |   |            |   |          |
| 108 | diagnosekriterien_teil_2_complette                                                           | Section Header: <i>Form Status</i><br>Complete?                                                                                                                                                             | dropdown<br><table border="1"> <tr> <td>0</td> <td>Incomplete</td> </tr> <tr> <td>1</td> <td>Unverified</td> </tr> <tr> <td>2</td> <td>Complete</td> </tr> </table> | 0 | Incomplete | 1 | Unverified | 2 | Complete |
| 0   | Incomplete                                                                                   |                                                                                                                                                                                                             |                                                                                                                                                                     |   |            |   |            |   |          |
| 1   | Unverified                                                                                   |                                                                                                                                                                                                             |                                                                                                                                                                     |   |            |   |            |   |          |
| 2   | Complete                                                                                     |                                                                                                                                                                                                             |                                                                                                                                                                     |   |            |   |            |   |          |

### Programing: only eligible participants can continue

([pcos\_diagnosis] or ((([mens\_age\_know] = '2') or ([mens\_age\_know] = '1' and ([mens\_age\_nr] = 1 or [mens\_age\_nr] = 2 or [mens\_age\_nr] = 3)) or  
 ((([mens\_age\_know] = '1' and [mens\_age\_nr] > 3) or ([mens\_age\_know] = '99')) and ((([mens\_current\_regular\_yn] = '1' and ([mens\_current\_reg\_cycle\_nr] < 21  
 or [mens\_current\_reg\_cycle\_nr] > 35)) or ([mens\_cycle90] = '1') or ([mens\_current\_regular\_yn] = '0' and (([mens\_current\_irreg\_spec] = '1' and  
 [mens\_current\_irreg\_none] >= 3) or ([mens\_current\_irreg\_spec] = '2' and ([mens\_current\_irreg\_min] < 21 or [mens\_current\_irreg\_max] > 35 or  
 [mens\_current\_irreg\_none] >= 3) or ([mens\_current\_irreg\_spec] = '88' and [mens\_current\_irreg\_cyclenr] < 8))) or ([mens\_past\_regular\_yn] = '1' and  
 ([mens\_past\_reg\_cycle\_nr] < 21 or [mens\_past\_reg\_cycle\_nr] > 35)) or ([mens\_past\_regular\_yn] = '0' and (([mens\_past\_irreg\_spec] = '1' and  
 [mens\_past\_irreg\_none] >= 3) or ([mens\_past\_irreg\_spec] = '2' and ([mens\_past\_irreg\_min] < 21 OR [mens\_past\_irreg\_max] > 35 or [mens\_past\_irreg\_cyclenr]  
 < 8) or ([mens\_past\_irreg\_spec] = '88' and [mens\_past\_irreg\_cyclenr] < 8)))))) and (([clhy\_acne\_yn] = '1' or [clhy\_alopezia\_yn] = '1' or [clhy\_hirsutism\_yn] =  
 '1') or ((([mens\_age\_know] = '2') or ([mens\_age\_know] = '1' and ([mens\_age\_nr] = 1 or [mens\_age\_nr] = 2 or [mens\_age\_nr] = 3)) or ((([mens\_age\_know] =  
 '1' and [mens\_age\_nr] > 3) or ([mens\_age\_know] = '99')) and ((([mens\_current\_regular\_yn] = '1' and ([mens\_current\_reg\_cycle\_nr] < 21 or  
 [mens\_current\_reg\_cycle\_nr] > 35)) or ([mens\_cycle90] = '1') or ([mens\_current\_regular\_yn] = '0' and (([mens\_current\_irreg\_spec] = '1' and  
 [mens\_current\_irreg\_none] >= 3) or ([mens\_current\_irreg\_spec] = '2' and ([mens\_current\_irreg\_min] < 21 or [mens\_current\_irreg\_max] > 35 or  
 [mens\_current\_irreg\_none] >= 3) or ([mens\_current\_irreg\_spec] = '88' and [mens\_current\_irreg\_cyclenr] < 8))) or ([mens\_past\_regular\_yn] = '1' and  
 ([mens\_past\_reg\_cycle\_nr] < 21 or [mens\_past\_reg\_cycle\_nr] > 35)) or ([mens\_past\_regular\_yn] = '0' and (([mens\_past\_irreg\_spec] = '1' and  
 [mens\_past\_irreg\_none] >= 3) or ([mens\_past\_irreg\_spec] = '2' and ([mens\_past\_irreg\_min] < 21 OR [mens\_past\_irreg\_max] > 35 or [mens\_past\_irreg\_cyclenr]  
 < 8) or ([mens\_past\_irreg\_spec] = '88' and [mens\_past\_irreg\_cyclenr] < 8)))))) and ([bchy\_hormone\_m\_yn] = '1')) or ((([mens\_age\_know] = '2') or  
 ([mens\_age\_know] = '1' and ([mens\_age\_nr] = 1 or [mens\_age\_nr] = 2 or [mens\_age\_nr] = 3)) or ((([mens\_age\_know] = '1' and [mens\_age\_nr] > 3) or  
 ([mens\_age\_know] = '99')) and ((([mens\_current\_regular\_yn] = '1' and ([mens\_current\_reg\_cycle\_nr] < 21 or [mens\_current\_reg\_cycle\_nr] > 35)) or  
 ([mens\_cycle90] = '1') or ([mens\_current\_regular\_yn] = '0' and (([mens\_current\_irreg\_spec] = '1' and [mens\_current\_irreg\_none] >= 3) or  
 ([mens\_current\_irreg\_spec] = '2' and ([mens\_current\_irreg\_min] < 21 or [mens\_current\_irreg\_max] > 35 or [mens\_current\_irreg\_cyclenr] < 8) or  
 ([mens\_current\_irreg\_spec] = '88' and [mens\_current\_irreg\_cyclenr] < 8))) or ([mens\_past\_regular\_yn] = '1' and ([mens\_past\_reg\_cycle\_nr] < 21 or  
 [mens\_past\_reg\_cycle\_nr] > 35)) or ([mens\_past\_regular\_yn] = '0' and (([mens\_past\_irreg\_spec] = '1' and [mens\_past\_irreg\_none] >= 3) or  
 ([mens\_past\_irreg\_spec] = '2' and ([mens\_past\_irreg\_min] < 21 OR [mens\_past\_irreg\_max] > 35 or [mens\_past\_irreg\_cyclenr] < 8) or  
 ([mens\_past\_irreg\_spec] = '88' and [mens\_past\_irreg\_cyclenr] < 8)))))) and ([pcom\_us\_cysts\_yn] = '1' or [pcom\_us\_ovarien\_yn] = '1')) or (([clhy\_acne\_yn] = '1'  
 or [clhy\_alopezia\_yn] = '1' or [clhy\_hirsutism\_yn] = '1') and ([pcom\_us\_cysts\_yn] = '1' or [pcom\_us\_ovarien\_yn] = '1')) or (([bchy\_hormone\_m\_yn] = '1' and  
 ([pcom\_us\_cysts\_yn] = '1' or [pcom\_us\_ovarien\_yn] = '1')))) and ([pcos\_dd\_aggs] = '0' and [pcos\_dd\_prolaktinom] = '0')

|     |                                                                                                       |                                                                                                                                                                                                                                                                                                                                                                                                   |                                                                                                                                                                                                                                                                                                                                                                                                                                                                                                                               |   |                             |                                                                                     |    |                             |                                           |   |                             |                                                                        |   |                             |                                         |    |                            |       |   |               |      |
|-----|-------------------------------------------------------------------------------------------------------|---------------------------------------------------------------------------------------------------------------------------------------------------------------------------------------------------------------------------------------------------------------------------------------------------------------------------------------------------------------------------------------------------|-------------------------------------------------------------------------------------------------------------------------------------------------------------------------------------------------------------------------------------------------------------------------------------------------------------------------------------------------------------------------------------------------------------------------------------------------------------------------------------------------------------------------------|---|-----------------------------|-------------------------------------------------------------------------------------|----|-----------------------------|-------------------------------------------|---|-----------------------------|------------------------------------------------------------------------|---|-----------------------------|-----------------------------------------|----|----------------------------|-------|---|---------------|------|
| 109 | pcos_info<br>Show the field ONLY if:<br>[pcos_diagnosis] = '0'                                        | You stated that you haven't received any former diagnosis for PCOS yet. According to your answers you fulfill criteria for PCOS. Please contact your gynecologist for further assessment. Inform him/her that you have been participating in an online survey telling you that you fulfill criteria for PCOS. For further inquiry we are at his/her disposal (julia.estermann@students.unibe.ch). | descriptive                                                                                                                                                                                                                                                                                                                                                                                                                                                                                                                   |   |                             |                                                                                     |    |                             |                                           |   |                             |                                                                        |   |                             |                                         |    |                            |       |   |               |      |
| 110 | cosm_neg_yn                                                                                           | Has your cosmetic appearance changed negatively due to PCOS?                                                                                                                                                                                                                                                                                                                                      | radio, Required<br><table border="1"> <tr><td>1</td><td>Yes</td></tr> <tr><td>0</td><td>No</td></tr> </table>                                                                                                                                                                                                                                                                                                                                                                                                                 | 1 | Yes                         | 0                                                                                   | No |                             |                                           |   |                             |                                                                        |   |                             |                                         |    |                            |       |   |               |      |
| 1   | Yes                                                                                                   |                                                                                                                                                                                                                                                                                                                                                                                                   |                                                                                                                                                                                                                                                                                                                                                                                                                                                                                                                               |   |                             |                                                                                     |    |                             |                                           |   |                             |                                                                        |   |                             |                                         |    |                            |       |   |               |      |
| 0   | No                                                                                                    |                                                                                                                                                                                                                                                                                                                                                                                                   |                                                                                                                                                                                                                                                                                                                                                                                                                                                                                                                               |   |                             |                                                                                     |    |                             |                                           |   |                             |                                                                        |   |                             |                                         |    |                            |       |   |               |      |
| 111 | cosm_probl                                                                                            | Please select the cosmetic issues affecting you in the present or past.<br><i>Some of the issues have been investigated earlier in this survey. Please check it again here. There will be asked some more detailed questions about those issues.</i>                                                                                                                                              | checkbox, Required<br><table border="1"> <tr><td>1</td><td>cosm_probl__1</td><td>acne</td></tr> <tr><td>2</td><td>cosm_probl__2</td><td>alopecia</td></tr> <tr><td>3</td><td>cosm_probl__3</td><td>excess hair growth</td></tr> <tr><td>4</td><td>cosm_probl__4</td><td>overweight</td></tr> <tr><td>88</td><td>cosm_probl__88</td><td>other</td></tr> <tr><td>0</td><td>cosm_probl__0</td><td>none</td></tr> </table> Field Annotation: @NONEOFTHEABOVE=0                                                                    | 1 | cosm_probl__1               | acne                                                                                | 2  | cosm_probl__2               | alopecia                                  | 3 | cosm_probl__3               | excess hair growth                                                     | 4 | cosm_probl__4               | overweight                              | 88 | cosm_probl__88             | other | 0 | cosm_probl__0 | none |
| 1   | cosm_probl__1                                                                                         | acne                                                                                                                                                                                                                                                                                                                                                                                              |                                                                                                                                                                                                                                                                                                                                                                                                                                                                                                                               |   |                             |                                                                                     |    |                             |                                           |   |                             |                                                                        |   |                             |                                         |    |                            |       |   |               |      |
| 2   | cosm_probl__2                                                                                         | alopecia                                                                                                                                                                                                                                                                                                                                                                                          |                                                                                                                                                                                                                                                                                                                                                                                                                                                                                                                               |   |                             |                                                                                     |    |                             |                                           |   |                             |                                                                        |   |                             |                                         |    |                            |       |   |               |      |
| 3   | cosm_probl__3                                                                                         | excess hair growth                                                                                                                                                                                                                                                                                                                                                                                |                                                                                                                                                                                                                                                                                                                                                                                                                                                                                                                               |   |                             |                                                                                     |    |                             |                                           |   |                             |                                                                        |   |                             |                                         |    |                            |       |   |               |      |
| 4   | cosm_probl__4                                                                                         | overweight                                                                                                                                                                                                                                                                                                                                                                                        |                                                                                                                                                                                                                                                                                                                                                                                                                                                                                                                               |   |                             |                                                                                     |    |                             |                                           |   |                             |                                                                        |   |                             |                                         |    |                            |       |   |               |      |
| 88  | cosm_probl__88                                                                                        | other                                                                                                                                                                                                                                                                                                                                                                                             |                                                                                                                                                                                                                                                                                                                                                                                                                                                                                                                               |   |                             |                                                                                     |    |                             |                                           |   |                             |                                                                        |   |                             |                                         |    |                            |       |   |               |      |
| 0   | cosm_probl__0                                                                                         | none                                                                                                                                                                                                                                                                                                                                                                                              |                                                                                                                                                                                                                                                                                                                                                                                                                                                                                                                               |   |                             |                                                                                     |    |                             |                                           |   |                             |                                                                        |   |                             |                                         |    |                            |       |   |               |      |
| 112 | cosm_probl_88<br>Show the field ONLY if:<br>[cosm_probl(88)] = '1'                                    | What other cosmetic issues?<br><i>Please specify.</i>                                                                                                                                                                                                                                                                                                                                             | notes, Required                                                                                                                                                                                                                                                                                                                                                                                                                                                                                                               |   |                             |                                                                                     |    |                             |                                           |   |                             |                                                                        |   |                             |                                         |    |                            |       |   |               |      |
| 113 | cosm_probl_acne_info<br>Show the field ONLY if:<br>[clhy_acne_yn] = '1'                               | Section Header: <i>acne</i><br>Earlier in this survey you stated to be affected by acne. Please answer following questions about it.                                                                                                                                                                                                                                                              | descriptive                                                                                                                                                                                                                                                                                                                                                                                                                                                                                                                   |   |                             |                                                                                     |    |                             |                                           |   |                             |                                                                        |   |                             |                                         |    |                            |       |   |               |      |
| 114 | cosm_probl_acne_bother_yn<br>Show the field ONLY if:<br>[cosm_probl(1)] = '1' or [clhy_acne_yn] = '1' | Does/did your acne bother you?                                                                                                                                                                                                                                                                                                                                                                    | radio, Required<br><table border="1"> <tr><td>1</td><td>Yes</td></tr> <tr><td>0</td><td>No</td></tr> </table>                                                                                                                                                                                                                                                                                                                                                                                                                 | 1 | Yes                         | 0                                                                                   | No |                             |                                           |   |                             |                                                                        |   |                             |                                         |    |                            |       |   |               |      |
| 1   | Yes                                                                                                   |                                                                                                                                                                                                                                                                                                                                                                                                   |                                                                                                                                                                                                                                                                                                                                                                                                                                                                                                                               |   |                             |                                                                                     |    |                             |                                           |   |                             |                                                                        |   |                             |                                         |    |                            |       |   |               |      |
| 0   | No                                                                                                    |                                                                                                                                                                                                                                                                                                                                                                                                   |                                                                                                                                                                                                                                                                                                                                                                                                                                                                                                                               |   |                             |                                                                                     |    |                             |                                           |   |                             |                                                                        |   |                             |                                         |    |                            |       |   |               |      |
| 115 | cosm_probl_acne_adv_yn<br>Show the field ONLY if:<br>[cosm_probl(1)] = '1' or [clhy_acne_yn] = '1'    | Have you been consulted by your gynecologists about this?                                                                                                                                                                                                                                                                                                                                         | radio, Required<br><table border="1"> <tr><td>1</td><td>Yes</td></tr> <tr><td>0</td><td>No</td></tr> </table>                                                                                                                                                                                                                                                                                                                                                                                                                 | 1 | Yes                         | 0                                                                                   | No |                             |                                           |   |                             |                                                                        |   |                             |                                         |    |                            |       |   |               |      |
| 1   | Yes                                                                                                   |                                                                                                                                                                                                                                                                                                                                                                                                   |                                                                                                                                                                                                                                                                                                                                                                                                                                                                                                                               |   |                             |                                                                                     |    |                             |                                           |   |                             |                                                                        |   |                             |                                         |    |                            |       |   |               |      |
| 0   | No                                                                                                    |                                                                                                                                                                                                                                                                                                                                                                                                   |                                                                                                                                                                                                                                                                                                                                                                                                                                                                                                                               |   |                             |                                                                                     |    |                             |                                           |   |                             |                                                                        |   |                             |                                         |    |                            |       |   |               |      |
| 116 | cosm_probl_acne_adv_sc<br>Show the field ONLY if:<br>[cosm_probl_acne_adv_yn] = '1'                   | Please rate your satisfaction with consultation regarding acne?<br><i>Drag the blue slider and drop it at the desired position.</i>                                                                                                                                                                                                                                                               | slider (number), Required<br>Slider labels: 0, 50, 100<br>Custom alignment: RH                                                                                                                                                                                                                                                                                                                                                                                                                                                |   |                             |                                                                                     |    |                             |                                           |   |                             |                                                                        |   |                             |                                         |    |                            |       |   |               |      |
| 117 | cosm_probl_acne_adv_wish<br>Show the field ONLY if:<br>[cosm_probl_acne_adv_yn] = '0'                 | Would you have wished for a consultation by your gynecologist regarding acne?                                                                                                                                                                                                                                                                                                                     | radio, Required<br><table border="1"> <tr><td>1</td><td>Yes</td></tr> <tr><td>0</td><td>No</td></tr> </table>                                                                                                                                                                                                                                                                                                                                                                                                                 | 1 | Yes                         | 0                                                                                   | No |                             |                                           |   |                             |                                                                        |   |                             |                                         |    |                            |       |   |               |      |
| 1   | Yes                                                                                                   |                                                                                                                                                                                                                                                                                                                                                                                                   |                                                                                                                                                                                                                                                                                                                                                                                                                                                                                                                               |   |                             |                                                                                     |    |                             |                                           |   |                             |                                                                        |   |                             |                                         |    |                            |       |   |               |      |
| 0   | No                                                                                                    |                                                                                                                                                                                                                                                                                                                                                                                                   |                                                                                                                                                                                                                                                                                                                                                                                                                                                                                                                               |   |                             |                                                                                     |    |                             |                                           |   |                             |                                                                        |   |                             |                                         |    |                            |       |   |               |      |
| 118 | cosm_probl_acne_th_yn<br>Show the field ONLY if:<br>[cosm_probl(1)] = '1' or [clhy_acne_yn] = '1'     | Have you tried any therapy for acne?                                                                                                                                                                                                                                                                                                                                                              | radio, Required<br><table border="1"> <tr><td>1</td><td>Yes</td></tr> <tr><td>0</td><td>No</td></tr> <tr><td>99</td><td>Unknown</td></tr> </table>                                                                                                                                                                                                                                                                                                                                                                            | 1 | Yes                         | 0                                                                                   | No | 99                          | Unknown                                   |   |                             |                                                                        |   |                             |                                         |    |                            |       |   |               |      |
| 1   | Yes                                                                                                   |                                                                                                                                                                                                                                                                                                                                                                                                   |                                                                                                                                                                                                                                                                                                                                                                                                                                                                                                                               |   |                             |                                                                                     |    |                             |                                           |   |                             |                                                                        |   |                             |                                         |    |                            |       |   |               |      |
| 0   | No                                                                                                    |                                                                                                                                                                                                                                                                                                                                                                                                   |                                                                                                                                                                                                                                                                                                                                                                                                                                                                                                                               |   |                             |                                                                                     |    |                             |                                           |   |                             |                                                                        |   |                             |                                         |    |                            |       |   |               |      |
| 99  | Unknown                                                                                               |                                                                                                                                                                                                                                                                                                                                                                                                   |                                                                                                                                                                                                                                                                                                                                                                                                                                                                                                                               |   |                             |                                                                                     |    |                             |                                           |   |                             |                                                                        |   |                             |                                         |    |                            |       |   |               |      |
| 119 | cosm_probl_acne_th_spec<br>Show the field ONLY if:<br>[cosm_probl_acne_th_yn] = '1'                   | Which therapy method have you tried already?<br><i>If you are not sure about one of the options you can check it to have a look at the sub-categories. If there isn't anything suitable you can uncheck the option again.</i>                                                                                                                                                                     | checkbox, Required<br><table border="1"> <tr><td>1</td><td>cosm_probl_acne_th_spec_1</td><td>lifestyle intervention (diet, exercise, etc.)</td></tr> <tr><td>2</td><td>cosm_probl_acne_th_spec_2</td><td>medication (including contraceptive pill)</td></tr> <tr><td>3</td><td>cosm_probl_acne_th_spec_3</td><td>psychotherapy</td></tr> <tr><td>4</td><td>cosm_probl_acne_th_spec_4</td><td>bariatric surgery (e.g. gastric bypass)</td></tr> <tr><td>88</td><td>cosm_probl_acne_th_spec_88</td><td>other</td></tr> </table> | 1 | cosm_probl_acne_th_spec_1   | lifestyle intervention (diet, exercise, etc.)                                       | 2  | cosm_probl_acne_th_spec_2   | medication (including contraceptive pill) | 3 | cosm_probl_acne_th_spec_3   | psychotherapy                                                          | 4 | cosm_probl_acne_th_spec_4   | bariatric surgery (e.g. gastric bypass) | 88 | cosm_probl_acne_th_spec_88 | other |   |               |      |
| 1   | cosm_probl_acne_th_spec_1                                                                             | lifestyle intervention (diet, exercise, etc.)                                                                                                                                                                                                                                                                                                                                                     |                                                                                                                                                                                                                                                                                                                                                                                                                                                                                                                               |   |                             |                                                                                     |    |                             |                                           |   |                             |                                                                        |   |                             |                                         |    |                            |       |   |               |      |
| 2   | cosm_probl_acne_th_spec_2                                                                             | medication (including contraceptive pill)                                                                                                                                                                                                                                                                                                                                                         |                                                                                                                                                                                                                                                                                                                                                                                                                                                                                                                               |   |                             |                                                                                     |    |                             |                                           |   |                             |                                                                        |   |                             |                                         |    |                            |       |   |               |      |
| 3   | cosm_probl_acne_th_spec_3                                                                             | psychotherapy                                                                                                                                                                                                                                                                                                                                                                                     |                                                                                                                                                                                                                                                                                                                                                                                                                                                                                                                               |   |                             |                                                                                     |    |                             |                                           |   |                             |                                                                        |   |                             |                                         |    |                            |       |   |               |      |
| 4   | cosm_probl_acne_th_spec_4                                                                             | bariatric surgery (e.g. gastric bypass)                                                                                                                                                                                                                                                                                                                                                           |                                                                                                                                                                                                                                                                                                                                                                                                                                                                                                                               |   |                             |                                                                                     |    |                             |                                           |   |                             |                                                                        |   |                             |                                         |    |                            |       |   |               |      |
| 88  | cosm_probl_acne_th_spec_88                                                                            | other                                                                                                                                                                                                                                                                                                                                                                                             |                                                                                                                                                                                                                                                                                                                                                                                                                                                                                                                               |   |                             |                                                                                     |    |                             |                                           |   |                             |                                                                        |   |                             |                                         |    |                            |       |   |               |      |
| 120 | cosm_probl_acne_th_spec_88<br>Show the field ONLY if:<br>[cosm_probl_acne_th_spec(88)] = '1'          | What other therapeutic options?<br><i>Please specify.</i>                                                                                                                                                                                                                                                                                                                                         | notes, Required                                                                                                                                                                                                                                                                                                                                                                                                                                                                                                               |   |                             |                                                                                     |    |                             |                                           |   |                             |                                                                        |   |                             |                                         |    |                            |       |   |               |      |
| 121 | cosm_probl_acne_th1_spec<br>Show the field ONLY if:<br>[cosm_probl_acne_th_spec(1)] = '1'             | Which lifestyle interventions have you tried?                                                                                                                                                                                                                                                                                                                                                     | checkbox, Required<br><table border="1"> <tr><td>1</td><td>cosm_probl_acne_th1_spec__1</td><td>Behavioural interventions (e.g. goal-setting, self-monitoring, slower eating, etc.)</td></tr> <tr><td>2</td><td>cosm_probl_acne_th1_spec__2</td><td>attitude</td></tr> <tr><td>3</td><td>cosm_probl_acne_th1_spec__3</td><td>dietary interventions (e.g. well-balanced, reduce energy intake, etc.)</td></tr> <tr><td>4</td><td>cosm_probl_acne_th1_spec__4</td><td>physical activity</td></tr> </table>                       | 1 | cosm_probl_acne_th1_spec__1 | Behavioural interventions (e.g. goal-setting, self-monitoring, slower eating, etc.) | 2  | cosm_probl_acne_th1_spec__2 | attitude                                  | 3 | cosm_probl_acne_th1_spec__3 | dietary interventions (e.g. well-balanced, reduce energy intake, etc.) | 4 | cosm_probl_acne_th1_spec__4 | physical activity                       |    |                            |       |   |               |      |
| 1   | cosm_probl_acne_th1_spec__1                                                                           | Behavioural interventions (e.g. goal-setting, self-monitoring, slower eating, etc.)                                                                                                                                                                                                                                                                                                               |                                                                                                                                                                                                                                                                                                                                                                                                                                                                                                                               |   |                             |                                                                                     |    |                             |                                           |   |                             |                                                                        |   |                             |                                         |    |                            |       |   |               |      |
| 2   | cosm_probl_acne_th1_spec__2                                                                           | attitude                                                                                                                                                                                                                                                                                                                                                                                          |                                                                                                                                                                                                                                                                                                                                                                                                                                                                                                                               |   |                             |                                                                                     |    |                             |                                           |   |                             |                                                                        |   |                             |                                         |    |                            |       |   |               |      |
| 3   | cosm_probl_acne_th1_spec__3                                                                           | dietary interventions (e.g. well-balanced, reduce energy intake, etc.)                                                                                                                                                                                                                                                                                                                            |                                                                                                                                                                                                                                                                                                                                                                                                                                                                                                                               |   |                             |                                                                                     |    |                             |                                           |   |                             |                                                                        |   |                             |                                         |    |                            |       |   |               |      |
| 4   | cosm_probl_acne_th1_spec__4                                                                           | physical activity                                                                                                                                                                                                                                                                                                                                                                                 |                                                                                                                                                                                                                                                                                                                                                                                                                                                                                                                               |   |                             |                                                                                     |    |                             |                                           |   |                             |                                                                        |   |                             |                                         |    |                            |       |   |               |      |

|     |                                                                                                |                                                                                                                                                 |                                                                                                                                                                                                                                                                                                                                                                                                                                                                                                                                                                                                                                                                                                                     |   |                            |                                                                                     |                |                             |                                           |   |                            |                                                                        |    |                             |                                         |    |                            |                                 |    |                             |                            |
|-----|------------------------------------------------------------------------------------------------|-------------------------------------------------------------------------------------------------------------------------------------------------|---------------------------------------------------------------------------------------------------------------------------------------------------------------------------------------------------------------------------------------------------------------------------------------------------------------------------------------------------------------------------------------------------------------------------------------------------------------------------------------------------------------------------------------------------------------------------------------------------------------------------------------------------------------------------------------------------------------------|---|----------------------------|-------------------------------------------------------------------------------------|----------------|-----------------------------|-------------------------------------------|---|----------------------------|------------------------------------------------------------------------|----|-----------------------------|-----------------------------------------|----|----------------------------|---------------------------------|----|-----------------------------|----------------------------|
|     |                                                                                                |                                                                                                                                                 | <table border="1"> <tr> <td>5</td> <td>cosm_probl_acne_th1_spec_5</td> <td>weight assessment and reduction</td> </tr> <tr> <td>88</td> <td>cosm_probl_acne_th1_spec_88</td> <td>other</td> </tr> </table>                                                                                                                                                                                                                                                                                                                                                                                                                                                                                                           | 5 | cosm_probl_acne_th1_spec_5 | weight assessment and reduction                                                     | 88             | cosm_probl_acne_th1_spec_88 | other                                     |   |                            |                                                                        |    |                             |                                         |    |                            |                                 |    |                             |                            |
| 5   | cosm_probl_acne_th1_spec_5                                                                     | weight assessment and reduction                                                                                                                 |                                                                                                                                                                                                                                                                                                                                                                                                                                                                                                                                                                                                                                                                                                                     |   |                            |                                                                                     |                |                             |                                           |   |                            |                                                                        |    |                             |                                         |    |                            |                                 |    |                             |                            |
| 88  | cosm_probl_acne_th1_spec_88                                                                    | other                                                                                                                                           |                                                                                                                                                                                                                                                                                                                                                                                                                                                                                                                                                                                                                                                                                                                     |   |                            |                                                                                     |                |                             |                                           |   |                            |                                                                        |    |                             |                                         |    |                            |                                 |    |                             |                            |
| 122 | cosm_probl_acne_th1_spec_88<br>Show the field ONLY if:<br>[cosm_probl_acne_th1_spec(88)] = '1' | What other lifestyle intervention?<br><i>Please specify.</i>                                                                                    | notes, Required                                                                                                                                                                                                                                                                                                                                                                                                                                                                                                                                                                                                                                                                                                     |   |                            |                                                                                     |                |                             |                                           |   |                            |                                                                        |    |                             |                                         |    |                            |                                 |    |                             |                            |
| 123 | cosm_probl_acne_th2_spec<br>Show the field ONLY if:<br>[cosm_probl_acne_th_spec(2)] = '1'      | Please select the applicable medications:                                                                                                       | checkbox, Required <table border="1"> <tr> <td>1</td> <td>cosm_probl_acne_th2_spec_1</td> <td>contraceptive pill</td> </tr> <tr> <td>2</td> <td>cosm_probl_acne_th2_spec_2</td> <td>anti-androgens</td> </tr> <tr> <td>3</td> <td>cosm_probl_acne_th2_spec_3</td> <td>metformin</td> </tr> <tr> <td>88</td> <td>cosm_probl_acne_th2_spec_88</td> <td>other</td> </tr> </table>                                                                                                                                                                                                                                                                                                                                      | 1 | cosm_probl_acne_th2_spec_1 | contraceptive pill                                                                  | 2              | cosm_probl_acne_th2_spec_2  | anti-androgens                            | 3 | cosm_probl_acne_th2_spec_3 | metformin                                                              | 88 | cosm_probl_acne_th2_spec_88 | other                                   |    |                            |                                 |    |                             |                            |
| 1   | cosm_probl_acne_th2_spec_1                                                                     | contraceptive pill                                                                                                                              |                                                                                                                                                                                                                                                                                                                                                                                                                                                                                                                                                                                                                                                                                                                     |   |                            |                                                                                     |                |                             |                                           |   |                            |                                                                        |    |                             |                                         |    |                            |                                 |    |                             |                            |
| 2   | cosm_probl_acne_th2_spec_2                                                                     | anti-androgens                                                                                                                                  |                                                                                                                                                                                                                                                                                                                                                                                                                                                                                                                                                                                                                                                                                                                     |   |                            |                                                                                     |                |                             |                                           |   |                            |                                                                        |    |                             |                                         |    |                            |                                 |    |                             |                            |
| 3   | cosm_probl_acne_th2_spec_3                                                                     | metformin                                                                                                                                       |                                                                                                                                                                                                                                                                                                                                                                                                                                                                                                                                                                                                                                                                                                                     |   |                            |                                                                                     |                |                             |                                           |   |                            |                                                                        |    |                             |                                         |    |                            |                                 |    |                             |                            |
| 88  | cosm_probl_acne_th2_spec_88                                                                    | other                                                                                                                                           |                                                                                                                                                                                                                                                                                                                                                                                                                                                                                                                                                                                                                                                                                                                     |   |                            |                                                                                     |                |                             |                                           |   |                            |                                                                        |    |                             |                                         |    |                            |                                 |    |                             |                            |
| 124 | cosm_probl_acne_th2_spec_88<br>Show the field ONLY if:<br>[cosm_probl_acne_th2_spec(88)] = '1' | What other medication?<br><i>Please specify.</i>                                                                                                | notes, Required                                                                                                                                                                                                                                                                                                                                                                                                                                                                                                                                                                                                                                                                                                     |   |                            |                                                                                     |                |                             |                                           |   |                            |                                                                        |    |                             |                                         |    |                            |                                 |    |                             |                            |
| 125 | cosm_probl_acne_th_effect<br>Show the field ONLY if:<br>[cosm_probl_acne_th_yn] = '1'          | Were the therapy attempts effective?                                                                                                            | dropdown, Required <table border="1"> <tr> <td>1</td> <td>Yes, completely</td> </tr> <tr> <td>2</td> <td>Yes, partially</td> </tr> <tr> <td>0</td> <td>No, not at all</td> </tr> </table>                                                                                                                                                                                                                                                                                                                                                                                                                                                                                                                           | 1 | Yes, completely            | 2                                                                                   | Yes, partially | 0                           | No, not at all                            |   |                            |                                                                        |    |                             |                                         |    |                            |                                 |    |                             |                            |
| 1   | Yes, completely                                                                                |                                                                                                                                                 |                                                                                                                                                                                                                                                                                                                                                                                                                                                                                                                                                                                                                                                                                                                     |   |                            |                                                                                     |                |                             |                                           |   |                            |                                                                        |    |                             |                                         |    |                            |                                 |    |                             |                            |
| 2   | Yes, partially                                                                                 |                                                                                                                                                 |                                                                                                                                                                                                                                                                                                                                                                                                                                                                                                                                                                                                                                                                                                                     |   |                            |                                                                                     |                |                             |                                           |   |                            |                                                                        |    |                             |                                         |    |                            |                                 |    |                             |                            |
| 0   | No, not at all                                                                                 |                                                                                                                                                 |                                                                                                                                                                                                                                                                                                                                                                                                                                                                                                                                                                                                                                                                                                                     |   |                            |                                                                                     |                |                             |                                           |   |                            |                                                                        |    |                             |                                         |    |                            |                                 |    |                             |                            |
| 126 | cosm_probl_acne_th_act<br>Show the field ONLY if:<br>[cosm_probl_acne_th_yn] = '1'             | Which of the therapy methods are you still currently implementing?                                                                              | checkbox, Required <table border="1"> <tr> <td>1</td> <td>cosm_probl_acne_th_act_1</td> <td>lifestyle intervention (diet, exercise, etc.)</td> </tr> <tr> <td>2</td> <td>cosm_probl_acne_th_act_2</td> <td>medication (including contraceptive pill)</td> </tr> <tr> <td>3</td> <td>cosm_probl_acne_th_act_3</td> <td>psychotherapy</td> </tr> <tr> <td>4</td> <td>cosm_probl_acne_th_act_4</td> <td>bariatric surgery (e.g. gastric bypass)</td> </tr> <tr> <td>88</td> <td>cosm_probl_acne_th_act_88</td> <td>other</td> </tr> <tr> <td>0</td> <td>cosm_probl_acne_th_act_0</td> <td>no therapy anymore</td> </tr> </table> Field Annotation: @NONEOFTHEABOVE=0                                                   | 1 | cosm_probl_acne_th_act_1   | lifestyle intervention (diet, exercise, etc.)                                       | 2              | cosm_probl_acne_th_act_2    | medication (including contraceptive pill) | 3 | cosm_probl_acne_th_act_3   | psychotherapy                                                          | 4  | cosm_probl_acne_th_act_4    | bariatric surgery (e.g. gastric bypass) | 88 | cosm_probl_acne_th_act_88  | other                           | 0  | cosm_probl_acne_th_act_0    | no therapy anymore         |
| 1   | cosm_probl_acne_th_act_1                                                                       | lifestyle intervention (diet, exercise, etc.)                                                                                                   |                                                                                                                                                                                                                                                                                                                                                                                                                                                                                                                                                                                                                                                                                                                     |   |                            |                                                                                     |                |                             |                                           |   |                            |                                                                        |    |                             |                                         |    |                            |                                 |    |                             |                            |
| 2   | cosm_probl_acne_th_act_2                                                                       | medication (including contraceptive pill)                                                                                                       |                                                                                                                                                                                                                                                                                                                                                                                                                                                                                                                                                                                                                                                                                                                     |   |                            |                                                                                     |                |                             |                                           |   |                            |                                                                        |    |                             |                                         |    |                            |                                 |    |                             |                            |
| 3   | cosm_probl_acne_th_act_3                                                                       | psychotherapy                                                                                                                                   |                                                                                                                                                                                                                                                                                                                                                                                                                                                                                                                                                                                                                                                                                                                     |   |                            |                                                                                     |                |                             |                                           |   |                            |                                                                        |    |                             |                                         |    |                            |                                 |    |                             |                            |
| 4   | cosm_probl_acne_th_act_4                                                                       | bariatric surgery (e.g. gastric bypass)                                                                                                         |                                                                                                                                                                                                                                                                                                                                                                                                                                                                                                                                                                                                                                                                                                                     |   |                            |                                                                                     |                |                             |                                           |   |                            |                                                                        |    |                             |                                         |    |                            |                                 |    |                             |                            |
| 88  | cosm_probl_acne_th_act_88                                                                      | other                                                                                                                                           |                                                                                                                                                                                                                                                                                                                                                                                                                                                                                                                                                                                                                                                                                                                     |   |                            |                                                                                     |                |                             |                                           |   |                            |                                                                        |    |                             |                                         |    |                            |                                 |    |                             |                            |
| 0   | cosm_probl_acne_th_act_0                                                                       | no therapy anymore                                                                                                                              |                                                                                                                                                                                                                                                                                                                                                                                                                                                                                                                                                                                                                                                                                                                     |   |                            |                                                                                     |                |                             |                                           |   |                            |                                                                        |    |                             |                                         |    |                            |                                 |    |                             |                            |
| 127 | cosm_probl_acne_th1_act<br>Show the field ONLY if:<br>[cosm_probl_acne_th_act(1)] = '1'        | Please select the lifestyle interventions you are still currently performing:                                                                   | checkbox, Required <table border="1"> <tr> <td>1</td> <td>cosm_probl_acne_th1_act__1</td> <td>Behavioural interventions (e.g. goal-setting, self-monitoring, slower eating, etc.)</td> </tr> <tr> <td>2</td> <td>cosm_probl_acne_th1_act__2</td> <td>attitude</td> </tr> <tr> <td>3</td> <td>cosm_probl_acne_th1_act__3</td> <td>dietary interventions (e.g. well-balanced, reduce energy intake, etc.)</td> </tr> <tr> <td>4</td> <td>cosm_probl_acne_th1_act__4</td> <td>physical activity</td> </tr> <tr> <td>5</td> <td>cosm_probl_acne_th1_act__5</td> <td>weight assessment and reduction</td> </tr> <tr> <td>88</td> <td>cosm_probl_acne_th1_act__88</td> <td>other (as described above)</td> </tr> </table> | 1 | cosm_probl_acne_th1_act__1 | Behavioural interventions (e.g. goal-setting, self-monitoring, slower eating, etc.) | 2              | cosm_probl_acne_th1_act__2  | attitude                                  | 3 | cosm_probl_acne_th1_act__3 | dietary interventions (e.g. well-balanced, reduce energy intake, etc.) | 4  | cosm_probl_acne_th1_act__4  | physical activity                       | 5  | cosm_probl_acne_th1_act__5 | weight assessment and reduction | 88 | cosm_probl_acne_th1_act__88 | other (as described above) |
| 1   | cosm_probl_acne_th1_act__1                                                                     | Behavioural interventions (e.g. goal-setting, self-monitoring, slower eating, etc.)                                                             |                                                                                                                                                                                                                                                                                                                                                                                                                                                                                                                                                                                                                                                                                                                     |   |                            |                                                                                     |                |                             |                                           |   |                            |                                                                        |    |                             |                                         |    |                            |                                 |    |                             |                            |
| 2   | cosm_probl_acne_th1_act__2                                                                     | attitude                                                                                                                                        |                                                                                                                                                                                                                                                                                                                                                                                                                                                                                                                                                                                                                                                                                                                     |   |                            |                                                                                     |                |                             |                                           |   |                            |                                                                        |    |                             |                                         |    |                            |                                 |    |                             |                            |
| 3   | cosm_probl_acne_th1_act__3                                                                     | dietary interventions (e.g. well-balanced, reduce energy intake, etc.)                                                                          |                                                                                                                                                                                                                                                                                                                                                                                                                                                                                                                                                                                                                                                                                                                     |   |                            |                                                                                     |                |                             |                                           |   |                            |                                                                        |    |                             |                                         |    |                            |                                 |    |                             |                            |
| 4   | cosm_probl_acne_th1_act__4                                                                     | physical activity                                                                                                                               |                                                                                                                                                                                                                                                                                                                                                                                                                                                                                                                                                                                                                                                                                                                     |   |                            |                                                                                     |                |                             |                                           |   |                            |                                                                        |    |                             |                                         |    |                            |                                 |    |                             |                            |
| 5   | cosm_probl_acne_th1_act__5                                                                     | weight assessment and reduction                                                                                                                 |                                                                                                                                                                                                                                                                                                                                                                                                                                                                                                                                                                                                                                                                                                                     |   |                            |                                                                                     |                |                             |                                           |   |                            |                                                                        |    |                             |                                         |    |                            |                                 |    |                             |                            |
| 88  | cosm_probl_acne_th1_act__88                                                                    | other (as described above)                                                                                                                      |                                                                                                                                                                                                                                                                                                                                                                                                                                                                                                                                                                                                                                                                                                                     |   |                            |                                                                                     |                |                             |                                           |   |                            |                                                                        |    |                             |                                         |    |                            |                                 |    |                             |                            |
| 128 | cosm_probl_acne_th2_act<br>Show the field ONLY if:<br>[cosm_probl_acne_th_act(2)] = '1'        | Please select the medication you are still currently taking:                                                                                    | checkbox, Required <table border="1"> <tr> <td>1</td> <td>cosm_probl_acne_th2_act_1</td> <td>contraceptive pill</td> </tr> <tr> <td>2</td> <td>cosm_probl_acne_th2_act_2</td> <td>anti-androgens</td> </tr> <tr> <td>3</td> <td>cosm_probl_acne_th2_act_3</td> <td>metformin</td> </tr> <tr> <td>88</td> <td>cosm_probl_acne_th2_act_88</td> <td>other (as described above)</td> </tr> </table>                                                                                                                                                                                                                                                                                                                     | 1 | cosm_probl_acne_th2_act_1  | contraceptive pill                                                                  | 2              | cosm_probl_acne_th2_act_2   | anti-androgens                            | 3 | cosm_probl_acne_th2_act_3  | metformin                                                              | 88 | cosm_probl_acne_th2_act_88  | other (as described above)              |    |                            |                                 |    |                             |                            |
| 1   | cosm_probl_acne_th2_act_1                                                                      | contraceptive pill                                                                                                                              |                                                                                                                                                                                                                                                                                                                                                                                                                                                                                                                                                                                                                                                                                                                     |   |                            |                                                                                     |                |                             |                                           |   |                            |                                                                        |    |                             |                                         |    |                            |                                 |    |                             |                            |
| 2   | cosm_probl_acne_th2_act_2                                                                      | anti-androgens                                                                                                                                  |                                                                                                                                                                                                                                                                                                                                                                                                                                                                                                                                                                                                                                                                                                                     |   |                            |                                                                                     |                |                             |                                           |   |                            |                                                                        |    |                             |                                         |    |                            |                                 |    |                             |                            |
| 3   | cosm_probl_acne_th2_act_3                                                                      | metformin                                                                                                                                       |                                                                                                                                                                                                                                                                                                                                                                                                                                                                                                                                                                                                                                                                                                                     |   |                            |                                                                                     |                |                             |                                           |   |                            |                                                                        |    |                             |                                         |    |                            |                                 |    |                             |                            |
| 88  | cosm_probl_acne_th2_act_88                                                                     | other (as described above)                                                                                                                      |                                                                                                                                                                                                                                                                                                                                                                                                                                                                                                                                                                                                                                                                                                                     |   |                            |                                                                                     |                |                             |                                           |   |                            |                                                                        |    |                             |                                         |    |                            |                                 |    |                             |                            |
| 129 | cosm_probl_acne_th_adv_yn<br>Show the field ONLY if:<br>[cosm_probl_acne_th_yn] = '1'          | Have you been consulted by your gynecologist regarding the therapy attempts?                                                                    | radio, Required <table border="1"> <tr> <td>1</td> <td>Yes</td> </tr> <tr> <td>0</td> <td>No</td> </tr> </table>                                                                                                                                                                                                                                                                                                                                                                                                                                                                                                                                                                                                    | 1 | Yes                        | 0                                                                                   | No             |                             |                                           |   |                            |                                                                        |    |                             |                                         |    |                            |                                 |    |                             |                            |
| 1   | Yes                                                                                            |                                                                                                                                                 |                                                                                                                                                                                                                                                                                                                                                                                                                                                                                                                                                                                                                                                                                                                     |   |                            |                                                                                     |                |                             |                                           |   |                            |                                                                        |    |                             |                                         |    |                            |                                 |    |                             |                            |
| 0   | No                                                                                             |                                                                                                                                                 |                                                                                                                                                                                                                                                                                                                                                                                                                                                                                                                                                                                                                                                                                                                     |   |                            |                                                                                     |                |                             |                                           |   |                            |                                                                        |    |                             |                                         |    |                            |                                 |    |                             |                            |
| 130 | cosm_probl_acne_th_adv_sc<br>Show the field ONLY if:<br>[cosm_probl_acne_th_adv_yn] = '1'      | Please rate your satisfaction with consultation regarding therapy attempts.<br><i>Drag the blue slider and drop it at the desired position.</i> | slider (number), Required<br>Slider labels: 0, 50, 100<br>Custom alignment: RH                                                                                                                                                                                                                                                                                                                                                                                                                                                                                                                                                                                                                                      |   |                            |                                                                                     |                |                             |                                           |   |                            |                                                                        |    |                             |                                         |    |                            |                                 |    |                             |                            |
| 131 | cosm_probl_acne_th_adv_wish<br>Show the field ONLY if:<br>[cosm_probl_acne_th_adv_yn] = '0'    | Would you have wished for a consultation by your gynecologist regarding therapy attempts?                                                       | radio, Required <table border="1"> <tr> <td>1</td> <td>Yes</td> </tr> <tr> <td>0</td> <td>No</td> </tr> </table>                                                                                                                                                                                                                                                                                                                                                                                                                                                                                                                                                                                                    | 1 | Yes                        | 0                                                                                   | No             |                             |                                           |   |                            |                                                                        |    |                             |                                         |    |                            |                                 |    |                             |                            |
| 1   | Yes                                                                                            |                                                                                                                                                 |                                                                                                                                                                                                                                                                                                                                                                                                                                                                                                                                                                                                                                                                                                                     |   |                            |                                                                                     |                |                             |                                           |   |                            |                                                                        |    |                             |                                         |    |                            |                                 |    |                             |                            |
| 0   | No                                                                                             |                                                                                                                                                 |                                                                                                                                                                                                                                                                                                                                                                                                                                                                                                                                                                                                                                                                                                                     |   |                            |                                                                                     |                |                             |                                           |   |                            |                                                                        |    |                             |                                         |    |                            |                                 |    |                             |                            |

|     |                                                                                                              |                                                                                                                                                                                                                               |                                                                                                                                                                                                                                                                                                                                                                                                                                                                                                                                                                                                                                                                           |   |                            |                                                                                     |                |                            |                                           |   |                            |                                                                        |    |                             |                                         |    |                            |                                 |    |                             |       |
|-----|--------------------------------------------------------------------------------------------------------------|-------------------------------------------------------------------------------------------------------------------------------------------------------------------------------------------------------------------------------|---------------------------------------------------------------------------------------------------------------------------------------------------------------------------------------------------------------------------------------------------------------------------------------------------------------------------------------------------------------------------------------------------------------------------------------------------------------------------------------------------------------------------------------------------------------------------------------------------------------------------------------------------------------------------|---|----------------------------|-------------------------------------------------------------------------------------|----------------|----------------------------|-------------------------------------------|---|----------------------------|------------------------------------------------------------------------|----|-----------------------------|-----------------------------------------|----|----------------------------|---------------------------------|----|-----------------------------|-------|
| 132 | cosm_probl_alop_info<br>Show the field ONLY if:<br>[clhy_alopezia_yn] = '1'                                  | Section Header: <i>alopecia</i><br>Earlier in this survey you stated to be affected by alopecia. Please answer following questions about it.                                                                                  | descriptive                                                                                                                                                                                                                                                                                                                                                                                                                                                                                                                                                                                                                                                               |   |                            |                                                                                     |                |                            |                                           |   |                            |                                                                        |    |                             |                                         |    |                            |                                 |    |                             |       |
| 133 | cosm_probl_alop_bother_yn<br>Show the field ONLY if:<br>[cosm_probl(2)] = '1' or<br>[clhy_alopezia_yn] = '1' | Does/did your alopecia bother you?                                                                                                                                                                                            | radio, Required<br><table border="1"> <tr><td>1</td><td>Yes</td></tr> <tr><td>0</td><td>No</td></tr> </table>                                                                                                                                                                                                                                                                                                                                                                                                                                                                                                                                                             | 1 | Yes                        | 0                                                                                   | No             |                            |                                           |   |                            |                                                                        |    |                             |                                         |    |                            |                                 |    |                             |       |
| 1   | Yes                                                                                                          |                                                                                                                                                                                                                               |                                                                                                                                                                                                                                                                                                                                                                                                                                                                                                                                                                                                                                                                           |   |                            |                                                                                     |                |                            |                                           |   |                            |                                                                        |    |                             |                                         |    |                            |                                 |    |                             |       |
| 0   | No                                                                                                           |                                                                                                                                                                                                                               |                                                                                                                                                                                                                                                                                                                                                                                                                                                                                                                                                                                                                                                                           |   |                            |                                                                                     |                |                            |                                           |   |                            |                                                                        |    |                             |                                         |    |                            |                                 |    |                             |       |
| 134 | cosm_probl_alop_adv_yn<br>Show the field ONLY if:<br>[cosm_probl(2)] = '1' or<br>[clhy_alopezia_yn] = '1'    | Have you been consultet by your gynecologists about this?                                                                                                                                                                     | radio, Required<br><table border="1"> <tr><td>1</td><td>Yes</td></tr> <tr><td>0</td><td>No</td></tr> </table>                                                                                                                                                                                                                                                                                                                                                                                                                                                                                                                                                             | 1 | Yes                        | 0                                                                                   | No             |                            |                                           |   |                            |                                                                        |    |                             |                                         |    |                            |                                 |    |                             |       |
| 1   | Yes                                                                                                          |                                                                                                                                                                                                                               |                                                                                                                                                                                                                                                                                                                                                                                                                                                                                                                                                                                                                                                                           |   |                            |                                                                                     |                |                            |                                           |   |                            |                                                                        |    |                             |                                         |    |                            |                                 |    |                             |       |
| 0   | No                                                                                                           |                                                                                                                                                                                                                               |                                                                                                                                                                                                                                                                                                                                                                                                                                                                                                                                                                                                                                                                           |   |                            |                                                                                     |                |                            |                                           |   |                            |                                                                        |    |                             |                                         |    |                            |                                 |    |                             |       |
| 135 | cosm_probl_alop_adv_sc<br>Show the field ONLY if:<br>[cosm_probl_alop_adv_yn] = '1'                          | Please rate your satisfaction with consultation regarding alopecia?<br><i>Drag the blue slider and drop it at the desired position.</i>                                                                                       | slider (number), Required<br>Slider labels: 0, 50, 100<br>Custom alignment: RH                                                                                                                                                                                                                                                                                                                                                                                                                                                                                                                                                                                            |   |                            |                                                                                     |                |                            |                                           |   |                            |                                                                        |    |                             |                                         |    |                            |                                 |    |                             |       |
| 136 | cosm_probl_alop_adv_wish<br>Show the field ONLY if:<br>[cosm_probl_alop_adv_yn] = '0'                        | Would you have wished for a consultation by your gynecologist regarding alopecia?                                                                                                                                             | radio, Required<br><table border="1"> <tr><td>1</td><td>Yes</td></tr> <tr><td>0</td><td>No</td></tr> </table>                                                                                                                                                                                                                                                                                                                                                                                                                                                                                                                                                             | 1 | Yes                        | 0                                                                                   | No             |                            |                                           |   |                            |                                                                        |    |                             |                                         |    |                            |                                 |    |                             |       |
| 1   | Yes                                                                                                          |                                                                                                                                                                                                                               |                                                                                                                                                                                                                                                                                                                                                                                                                                                                                                                                                                                                                                                                           |   |                            |                                                                                     |                |                            |                                           |   |                            |                                                                        |    |                             |                                         |    |                            |                                 |    |                             |       |
| 0   | No                                                                                                           |                                                                                                                                                                                                                               |                                                                                                                                                                                                                                                                                                                                                                                                                                                                                                                                                                                                                                                                           |   |                            |                                                                                     |                |                            |                                           |   |                            |                                                                        |    |                             |                                         |    |                            |                                 |    |                             |       |
| 137 | cosm_probl_alop_th_yn<br>Show the field ONLY if:<br>[cosm_probl(2)] = '1' or<br>[clhy_alopezia_yn] = '1'     | Have you tried any therapy for alopecia?                                                                                                                                                                                      | radio, Required<br><table border="1"> <tr><td>1</td><td>Yes</td></tr> <tr><td>0</td><td>No</td></tr> <tr><td>99</td><td>Unknown</td></tr> </table>                                                                                                                                                                                                                                                                                                                                                                                                                                                                                                                        | 1 | Yes                        | 0                                                                                   | No             | 99                         | Unknown                                   |   |                            |                                                                        |    |                             |                                         |    |                            |                                 |    |                             |       |
| 1   | Yes                                                                                                          |                                                                                                                                                                                                                               |                                                                                                                                                                                                                                                                                                                                                                                                                                                                                                                                                                                                                                                                           |   |                            |                                                                                     |                |                            |                                           |   |                            |                                                                        |    |                             |                                         |    |                            |                                 |    |                             |       |
| 0   | No                                                                                                           |                                                                                                                                                                                                                               |                                                                                                                                                                                                                                                                                                                                                                                                                                                                                                                                                                                                                                                                           |   |                            |                                                                                     |                |                            |                                           |   |                            |                                                                        |    |                             |                                         |    |                            |                                 |    |                             |       |
| 99  | Unknown                                                                                                      |                                                                                                                                                                                                                               |                                                                                                                                                                                                                                                                                                                                                                                                                                                                                                                                                                                                                                                                           |   |                            |                                                                                     |                |                            |                                           |   |                            |                                                                        |    |                             |                                         |    |                            |                                 |    |                             |       |
| 138 | cosm_probl_alopecia_th_spec<br>Show the field ONLY if:<br>[cosm_probl_alopecia_th_yn] = '1'                  | Which therapy method have you tried already?<br><i>If you are not sure about one of the options you can check it to have a look at the sub-categories. If there isn't anything suitable you can unckeck the option again.</i> | checkbox, Required<br><table border="1"> <tr><td>1</td><td>cosm_probl_alop_th_spec_1</td><td>lifestyle intervention (diet, exercise, etc.)</td></tr> <tr><td>2</td><td>cosm_probl_alop_th_spec_2</td><td>medication (including contraceptive pill)</td></tr> <tr><td>3</td><td>cosm_probl_alop_th_spec_3</td><td>psychotherapy</td></tr> <tr><td>4</td><td>cosm_probl_alop_th_spec_4</td><td>bariatric surgery (e.g. gastric bypass)</td></tr> <tr><td>88</td><td>cosm_probl_alop_th_spec_88</td><td>other</td></tr> </table>                                                                                                                                             | 1 | cosm_probl_alop_th_spec_1  | lifestyle intervention (diet, exercise, etc.)                                       | 2              | cosm_probl_alop_th_spec_2  | medication (including contraceptive pill) | 3 | cosm_probl_alop_th_spec_3  | psychotherapy                                                          | 4  | cosm_probl_alop_th_spec_4   | bariatric surgery (e.g. gastric bypass) | 88 | cosm_probl_alop_th_spec_88 | other                           |    |                             |       |
| 1   | cosm_probl_alop_th_spec_1                                                                                    | lifestyle intervention (diet, exercise, etc.)                                                                                                                                                                                 |                                                                                                                                                                                                                                                                                                                                                                                                                                                                                                                                                                                                                                                                           |   |                            |                                                                                     |                |                            |                                           |   |                            |                                                                        |    |                             |                                         |    |                            |                                 |    |                             |       |
| 2   | cosm_probl_alop_th_spec_2                                                                                    | medication (including contraceptive pill)                                                                                                                                                                                     |                                                                                                                                                                                                                                                                                                                                                                                                                                                                                                                                                                                                                                                                           |   |                            |                                                                                     |                |                            |                                           |   |                            |                                                                        |    |                             |                                         |    |                            |                                 |    |                             |       |
| 3   | cosm_probl_alop_th_spec_3                                                                                    | psychotherapy                                                                                                                                                                                                                 |                                                                                                                                                                                                                                                                                                                                                                                                                                                                                                                                                                                                                                                                           |   |                            |                                                                                     |                |                            |                                           |   |                            |                                                                        |    |                             |                                         |    |                            |                                 |    |                             |       |
| 4   | cosm_probl_alop_th_spec_4                                                                                    | bariatric surgery (e.g. gastric bypass)                                                                                                                                                                                       |                                                                                                                                                                                                                                                                                                                                                                                                                                                                                                                                                                                                                                                                           |   |                            |                                                                                     |                |                            |                                           |   |                            |                                                                        |    |                             |                                         |    |                            |                                 |    |                             |       |
| 88  | cosm_probl_alop_th_spec_88                                                                                   | other                                                                                                                                                                                                                         |                                                                                                                                                                                                                                                                                                                                                                                                                                                                                                                                                                                                                                                                           |   |                            |                                                                                     |                |                            |                                           |   |                            |                                                                        |    |                             |                                         |    |                            |                                 |    |                             |       |
| 139 | cosm_probl_alop_th_spec_88<br>Show the field ONLY if:<br>[cosm_probl_alop_th_spec(88)] = '1'                 | What other therapeutic options?<br><i>Please specify.</i>                                                                                                                                                                     | notes, Required                                                                                                                                                                                                                                                                                                                                                                                                                                                                                                                                                                                                                                                           |   |                            |                                                                                     |                |                            |                                           |   |                            |                                                                        |    |                             |                                         |    |                            |                                 |    |                             |       |
| 140 | cosm_probl_alop_th1_spec<br>Show the field ONLY if:<br>[cosm_probl_alop_th_spec(1)] = '1'                    | Which lifestyle interventions have you tried?                                                                                                                                                                                 | checkbox, Required<br><table border="1"> <tr><td>1</td><td>cosm_probl_alop_th1_spec_1</td><td>Behavioural interventions (e.g. goal-setting, self-monitoring, slower eating, etc.)</td></tr> <tr><td>2</td><td>cosm_probl_alop_th1_spec_2</td><td>attitude</td></tr> <tr><td>3</td><td>cosm_probl_alop_th1_spec_3</td><td>dietary interventions (e.g. well-balanced, reduce energy intake, etc.)</td></tr> <tr><td>4</td><td>cosm_probl_alop_th1_spec_4</td><td>physical activity</td></tr> <tr><td>5</td><td>cosm_probl_alop_th1_spec_5</td><td>weight assessment and reduction</td></tr> <tr><td>88</td><td>cosm_probl_alop_th1_spec_88</td><td>other</td></tr> </table> | 1 | cosm_probl_alop_th1_spec_1 | Behavioural interventions (e.g. goal-setting, self-monitoring, slower eating, etc.) | 2              | cosm_probl_alop_th1_spec_2 | attitude                                  | 3 | cosm_probl_alop_th1_spec_3 | dietary interventions (e.g. well-balanced, reduce energy intake, etc.) | 4  | cosm_probl_alop_th1_spec_4  | physical activity                       | 5  | cosm_probl_alop_th1_spec_5 | weight assessment and reduction | 88 | cosm_probl_alop_th1_spec_88 | other |
| 1   | cosm_probl_alop_th1_spec_1                                                                                   | Behavioural interventions (e.g. goal-setting, self-monitoring, slower eating, etc.)                                                                                                                                           |                                                                                                                                                                                                                                                                                                                                                                                                                                                                                                                                                                                                                                                                           |   |                            |                                                                                     |                |                            |                                           |   |                            |                                                                        |    |                             |                                         |    |                            |                                 |    |                             |       |
| 2   | cosm_probl_alop_th1_spec_2                                                                                   | attitude                                                                                                                                                                                                                      |                                                                                                                                                                                                                                                                                                                                                                                                                                                                                                                                                                                                                                                                           |   |                            |                                                                                     |                |                            |                                           |   |                            |                                                                        |    |                             |                                         |    |                            |                                 |    |                             |       |
| 3   | cosm_probl_alop_th1_spec_3                                                                                   | dietary interventions (e.g. well-balanced, reduce energy intake, etc.)                                                                                                                                                        |                                                                                                                                                                                                                                                                                                                                                                                                                                                                                                                                                                                                                                                                           |   |                            |                                                                                     |                |                            |                                           |   |                            |                                                                        |    |                             |                                         |    |                            |                                 |    |                             |       |
| 4   | cosm_probl_alop_th1_spec_4                                                                                   | physical activity                                                                                                                                                                                                             |                                                                                                                                                                                                                                                                                                                                                                                                                                                                                                                                                                                                                                                                           |   |                            |                                                                                     |                |                            |                                           |   |                            |                                                                        |    |                             |                                         |    |                            |                                 |    |                             |       |
| 5   | cosm_probl_alop_th1_spec_5                                                                                   | weight assessment and reduction                                                                                                                                                                                               |                                                                                                                                                                                                                                                                                                                                                                                                                                                                                                                                                                                                                                                                           |   |                            |                                                                                     |                |                            |                                           |   |                            |                                                                        |    |                             |                                         |    |                            |                                 |    |                             |       |
| 88  | cosm_probl_alop_th1_spec_88                                                                                  | other                                                                                                                                                                                                                         |                                                                                                                                                                                                                                                                                                                                                                                                                                                                                                                                                                                                                                                                           |   |                            |                                                                                     |                |                            |                                           |   |                            |                                                                        |    |                             |                                         |    |                            |                                 |    |                             |       |
| 141 | cosm_probl_alop_th1_spec_88<br>Show the field ONLY if:<br>[cosm_probl_alop_th1_spec(88)] = '1'               | What other lifestyle intervention?<br><i>Please specify.</i>                                                                                                                                                                  | notes, Required                                                                                                                                                                                                                                                                                                                                                                                                                                                                                                                                                                                                                                                           |   |                            |                                                                                     |                |                            |                                           |   |                            |                                                                        |    |                             |                                         |    |                            |                                 |    |                             |       |
| 142 | cosm_probl_alop_th2_spec<br>Show the field ONLY if:<br>[cosm_probl_alop_th_spec(2)] = '1'                    | Please select the applicable medications:                                                                                                                                                                                     | checkbox, Required<br><table border="1"> <tr><td>1</td><td>cosm_probl_alop_th2_spec_1</td><td>contraceptive pill</td></tr> <tr><td>2</td><td>cosm_probl_alop_th2_spec_2</td><td>anti-androgens</td></tr> <tr><td>3</td><td>cosm_probl_alop_th2_spec_3</td><td>metformin</td></tr> <tr><td>88</td><td>cosm_probl_alop_th2_spec_88</td><td>other</td></tr> </table>                                                                                                                                                                                                                                                                                                         | 1 | cosm_probl_alop_th2_spec_1 | contraceptive pill                                                                  | 2              | cosm_probl_alop_th2_spec_2 | anti-androgens                            | 3 | cosm_probl_alop_th2_spec_3 | metformin                                                              | 88 | cosm_probl_alop_th2_spec_88 | other                                   |    |                            |                                 |    |                             |       |
| 1   | cosm_probl_alop_th2_spec_1                                                                                   | contraceptive pill                                                                                                                                                                                                            |                                                                                                                                                                                                                                                                                                                                                                                                                                                                                                                                                                                                                                                                           |   |                            |                                                                                     |                |                            |                                           |   |                            |                                                                        |    |                             |                                         |    |                            |                                 |    |                             |       |
| 2   | cosm_probl_alop_th2_spec_2                                                                                   | anti-androgens                                                                                                                                                                                                                |                                                                                                                                                                                                                                                                                                                                                                                                                                                                                                                                                                                                                                                                           |   |                            |                                                                                     |                |                            |                                           |   |                            |                                                                        |    |                             |                                         |    |                            |                                 |    |                             |       |
| 3   | cosm_probl_alop_th2_spec_3                                                                                   | metformin                                                                                                                                                                                                                     |                                                                                                                                                                                                                                                                                                                                                                                                                                                                                                                                                                                                                                                                           |   |                            |                                                                                     |                |                            |                                           |   |                            |                                                                        |    |                             |                                         |    |                            |                                 |    |                             |       |
| 88  | cosm_probl_alop_th2_spec_88                                                                                  | other                                                                                                                                                                                                                         |                                                                                                                                                                                                                                                                                                                                                                                                                                                                                                                                                                                                                                                                           |   |                            |                                                                                     |                |                            |                                           |   |                            |                                                                        |    |                             |                                         |    |                            |                                 |    |                             |       |
| 143 | cosm_probl_alop_th2_spec_88<br>Show the field ONLY if:<br>[cosm_probl_alop_th2_spec(88)] = '1'               | What other medication?<br><i>Please specify.</i>                                                                                                                                                                              | notes, Required                                                                                                                                                                                                                                                                                                                                                                                                                                                                                                                                                                                                                                                           |   |                            |                                                                                     |                |                            |                                           |   |                            |                                                                        |    |                             |                                         |    |                            |                                 |    |                             |       |
| 144 | cosm_probl_alop_th_effect<br>Show the field ONLY if:<br>[cosm_probl_alop_th_yn] = '1'                        | Were the therapy attempts effective?                                                                                                                                                                                          | dropdown, Required<br><table border="1"> <tr><td>1</td><td>Yes, completely</td></tr> <tr><td>2</td><td>Yes, partially</td></tr> <tr><td>0</td><td>No, not at all</td></tr> </table>                                                                                                                                                                                                                                                                                                                                                                                                                                                                                       | 1 | Yes, completely            | 2                                                                                   | Yes, partially | 0                          | No, not at all                            |   |                            |                                                                        |    |                             |                                         |    |                            |                                 |    |                             |       |
| 1   | Yes, completely                                                                                              |                                                                                                                                                                                                                               |                                                                                                                                                                                                                                                                                                                                                                                                                                                                                                                                                                                                                                                                           |   |                            |                                                                                     |                |                            |                                           |   |                            |                                                                        |    |                             |                                         |    |                            |                                 |    |                             |       |
| 2   | Yes, partially                                                                                               |                                                                                                                                                                                                                               |                                                                                                                                                                                                                                                                                                                                                                                                                                                                                                                                                                                                                                                                           |   |                            |                                                                                     |                |                            |                                           |   |                            |                                                                        |    |                             |                                         |    |                            |                                 |    |                             |       |
| 0   | No, not at all                                                                                               |                                                                                                                                                                                                                               |                                                                                                                                                                                                                                                                                                                                                                                                                                                                                                                                                                                                                                                                           |   |                            |                                                                                     |                |                            |                                           |   |                            |                                                                        |    |                             |                                         |    |                            |                                 |    |                             |       |



|     |                                                                                             |                                                                                                                                                 |                                                                                                                                                                                                                                                                                                                                                                                                                                                                                                                                                                                                                                                                                                                  |   |                           |                                                                                     |    |                           |                                           |   |                           |                                                                        |    |                            |                                         |    |                           |                                 |    |                            |                            |
|-----|---------------------------------------------------------------------------------------------|-------------------------------------------------------------------------------------------------------------------------------------------------|------------------------------------------------------------------------------------------------------------------------------------------------------------------------------------------------------------------------------------------------------------------------------------------------------------------------------------------------------------------------------------------------------------------------------------------------------------------------------------------------------------------------------------------------------------------------------------------------------------------------------------------------------------------------------------------------------------------|---|---------------------------|-------------------------------------------------------------------------------------|----|---------------------------|-------------------------------------------|---|---------------------------|------------------------------------------------------------------------|----|----------------------------|-----------------------------------------|----|---------------------------|---------------------------------|----|----------------------------|----------------------------|
| 145 | cosm_probl_alop_th_act<br>Show the field ONLY if:<br>[cosm_probl_alop_th_yn] = '1'          | Which of the therapy methods are you still currently implementing?                                                                              | checkbox, Required<br><table border="1"> <tr> <td>1</td> <td>cosm_probl_alop_th_act_1</td> <td>lifestyle intervention (diet, exercise, etc.)</td> </tr> <tr> <td>2</td> <td>cosm_probl_alop_th_act_2</td> <td>medication (including contraceptive pill)</td> </tr> <tr> <td>3</td> <td>cosm_probl_alop_th_act_3</td> <td>psychotherapy</td> </tr> <tr> <td>4</td> <td>cosm_probl_alop_th_act_4</td> <td>bariatric surgery (e.g. gastric bypass)</td> </tr> <tr> <td>88</td> <td>cosm_probl_alop_th_act_88</td> <td>other</td> </tr> <tr> <td>0</td> <td>cosm_probl_alop_th_act_0</td> <td>no therapy anymore</td> </tr> </table> Field Annotation: @NONEOFTHEABOVE=0                                             | 1 | cosm_probl_alop_th_act_1  | lifestyle intervention (diet, exercise, etc.)                                       | 2  | cosm_probl_alop_th_act_2  | medication (including contraceptive pill) | 3 | cosm_probl_alop_th_act_3  | psychotherapy                                                          | 4  | cosm_probl_alop_th_act_4   | bariatric surgery (e.g. gastric bypass) | 88 | cosm_probl_alop_th_act_88 | other                           | 0  | cosm_probl_alop_th_act_0   | no therapy anymore         |
| 1   | cosm_probl_alop_th_act_1                                                                    | lifestyle intervention (diet, exercise, etc.)                                                                                                   |                                                                                                                                                                                                                                                                                                                                                                                                                                                                                                                                                                                                                                                                                                                  |   |                           |                                                                                     |    |                           |                                           |   |                           |                                                                        |    |                            |                                         |    |                           |                                 |    |                            |                            |
| 2   | cosm_probl_alop_th_act_2                                                                    | medication (including contraceptive pill)                                                                                                       |                                                                                                                                                                                                                                                                                                                                                                                                                                                                                                                                                                                                                                                                                                                  |   |                           |                                                                                     |    |                           |                                           |   |                           |                                                                        |    |                            |                                         |    |                           |                                 |    |                            |                            |
| 3   | cosm_probl_alop_th_act_3                                                                    | psychotherapy                                                                                                                                   |                                                                                                                                                                                                                                                                                                                                                                                                                                                                                                                                                                                                                                                                                                                  |   |                           |                                                                                     |    |                           |                                           |   |                           |                                                                        |    |                            |                                         |    |                           |                                 |    |                            |                            |
| 4   | cosm_probl_alop_th_act_4                                                                    | bariatric surgery (e.g. gastric bypass)                                                                                                         |                                                                                                                                                                                                                                                                                                                                                                                                                                                                                                                                                                                                                                                                                                                  |   |                           |                                                                                     |    |                           |                                           |   |                           |                                                                        |    |                            |                                         |    |                           |                                 |    |                            |                            |
| 88  | cosm_probl_alop_th_act_88                                                                   | other                                                                                                                                           |                                                                                                                                                                                                                                                                                                                                                                                                                                                                                                                                                                                                                                                                                                                  |   |                           |                                                                                     |    |                           |                                           |   |                           |                                                                        |    |                            |                                         |    |                           |                                 |    |                            |                            |
| 0   | cosm_probl_alop_th_act_0                                                                    | no therapy anymore                                                                                                                              |                                                                                                                                                                                                                                                                                                                                                                                                                                                                                                                                                                                                                                                                                                                  |   |                           |                                                                                     |    |                           |                                           |   |                           |                                                                        |    |                            |                                         |    |                           |                                 |    |                            |                            |
| 146 | cosm_probl_alop_th1_act<br>Show the field ONLY if:<br>[cosm_probl_alop_th_act(1)] = '1'     | Please select the lifestyle interventions you are still currently performing:                                                                   | checkbox, Required<br><table border="1"> <tr> <td>1</td> <td>cosm_probl_alop_th1_act_1</td> <td>Behavioural interventions (e.g. goal-setting, self-monitoring, slower eating, etc.)</td> </tr> <tr> <td>2</td> <td>cosm_probl_alop_th1_act_2</td> <td>attitude</td> </tr> <tr> <td>3</td> <td>cosm_probl_alop_th1_act_3</td> <td>dietary interventions (e.g. well-balanced, reduce energy intake, etc.)</td> </tr> <tr> <td>4</td> <td>cosm_probl_alop_th1_act_4</td> <td>physical activity</td> </tr> <tr> <td>5</td> <td>cosm_probl_alop_th1_act_5</td> <td>weight assessment and reduction</td> </tr> <tr> <td>88</td> <td>cosm_probl_alop_th1_act_88</td> <td>other (as described above)</td> </tr> </table> | 1 | cosm_probl_alop_th1_act_1 | Behavioural interventions (e.g. goal-setting, self-monitoring, slower eating, etc.) | 2  | cosm_probl_alop_th1_act_2 | attitude                                  | 3 | cosm_probl_alop_th1_act_3 | dietary interventions (e.g. well-balanced, reduce energy intake, etc.) | 4  | cosm_probl_alop_th1_act_4  | physical activity                       | 5  | cosm_probl_alop_th1_act_5 | weight assessment and reduction | 88 | cosm_probl_alop_th1_act_88 | other (as described above) |
| 1   | cosm_probl_alop_th1_act_1                                                                   | Behavioural interventions (e.g. goal-setting, self-monitoring, slower eating, etc.)                                                             |                                                                                                                                                                                                                                                                                                                                                                                                                                                                                                                                                                                                                                                                                                                  |   |                           |                                                                                     |    |                           |                                           |   |                           |                                                                        |    |                            |                                         |    |                           |                                 |    |                            |                            |
| 2   | cosm_probl_alop_th1_act_2                                                                   | attitude                                                                                                                                        |                                                                                                                                                                                                                                                                                                                                                                                                                                                                                                                                                                                                                                                                                                                  |   |                           |                                                                                     |    |                           |                                           |   |                           |                                                                        |    |                            |                                         |    |                           |                                 |    |                            |                            |
| 3   | cosm_probl_alop_th1_act_3                                                                   | dietary interventions (e.g. well-balanced, reduce energy intake, etc.)                                                                          |                                                                                                                                                                                                                                                                                                                                                                                                                                                                                                                                                                                                                                                                                                                  |   |                           |                                                                                     |    |                           |                                           |   |                           |                                                                        |    |                            |                                         |    |                           |                                 |    |                            |                            |
| 4   | cosm_probl_alop_th1_act_4                                                                   | physical activity                                                                                                                               |                                                                                                                                                                                                                                                                                                                                                                                                                                                                                                                                                                                                                                                                                                                  |   |                           |                                                                                     |    |                           |                                           |   |                           |                                                                        |    |                            |                                         |    |                           |                                 |    |                            |                            |
| 5   | cosm_probl_alop_th1_act_5                                                                   | weight assessment and reduction                                                                                                                 |                                                                                                                                                                                                                                                                                                                                                                                                                                                                                                                                                                                                                                                                                                                  |   |                           |                                                                                     |    |                           |                                           |   |                           |                                                                        |    |                            |                                         |    |                           |                                 |    |                            |                            |
| 88  | cosm_probl_alop_th1_act_88                                                                  | other (as described above)                                                                                                                      |                                                                                                                                                                                                                                                                                                                                                                                                                                                                                                                                                                                                                                                                                                                  |   |                           |                                                                                     |    |                           |                                           |   |                           |                                                                        |    |                            |                                         |    |                           |                                 |    |                            |                            |
| 147 | cosm_probl_alop_th2_act<br>Show the field ONLY if:<br>[cosm_probl_alop_th_act(2)] = '1'     | Please select the medication you are still currently taking:                                                                                    | checkbox, Required<br><table border="1"> <tr> <td>1</td> <td>cosm_probl_alop_th2_act_1</td> <td>contraceptive pill</td> </tr> <tr> <td>2</td> <td>cosm_probl_alop_th2_act_2</td> <td>anti-androgens</td> </tr> <tr> <td>3</td> <td>cosm_probl_alop_th2_act_3</td> <td>metformin</td> </tr> <tr> <td>88</td> <td>cosm_probl_alop_th2_act_88</td> <td>other (as described above)</td> </tr> </table>                                                                                                                                                                                                                                                                                                               | 1 | cosm_probl_alop_th2_act_1 | contraceptive pill                                                                  | 2  | cosm_probl_alop_th2_act_2 | anti-androgens                            | 3 | cosm_probl_alop_th2_act_3 | metformin                                                              | 88 | cosm_probl_alop_th2_act_88 | other (as described above)              |    |                           |                                 |    |                            |                            |
| 1   | cosm_probl_alop_th2_act_1                                                                   | contraceptive pill                                                                                                                              |                                                                                                                                                                                                                                                                                                                                                                                                                                                                                                                                                                                                                                                                                                                  |   |                           |                                                                                     |    |                           |                                           |   |                           |                                                                        |    |                            |                                         |    |                           |                                 |    |                            |                            |
| 2   | cosm_probl_alop_th2_act_2                                                                   | anti-androgens                                                                                                                                  |                                                                                                                                                                                                                                                                                                                                                                                                                                                                                                                                                                                                                                                                                                                  |   |                           |                                                                                     |    |                           |                                           |   |                           |                                                                        |    |                            |                                         |    |                           |                                 |    |                            |                            |
| 3   | cosm_probl_alop_th2_act_3                                                                   | metformin                                                                                                                                       |                                                                                                                                                                                                                                                                                                                                                                                                                                                                                                                                                                                                                                                                                                                  |   |                           |                                                                                     |    |                           |                                           |   |                           |                                                                        |    |                            |                                         |    |                           |                                 |    |                            |                            |
| 88  | cosm_probl_alop_th2_act_88                                                                  | other (as described above)                                                                                                                      |                                                                                                                                                                                                                                                                                                                                                                                                                                                                                                                                                                                                                                                                                                                  |   |                           |                                                                                     |    |                           |                                           |   |                           |                                                                        |    |                            |                                         |    |                           |                                 |    |                            |                            |
| 148 | cosm_probl_alop_th_adv_yn<br>Show the field ONLY if:<br>[cosm_probl_alop_th_yn] = '1'       | Have you been consulted by your gynecologist regarding the therapy attempts?                                                                    | radio, Required<br><table border="1"> <tr> <td>1</td> <td>Yes</td> </tr> <tr> <td>0</td> <td>No</td> </tr> </table>                                                                                                                                                                                                                                                                                                                                                                                                                                                                                                                                                                                              | 1 | Yes                       | 0                                                                                   | No |                           |                                           |   |                           |                                                                        |    |                            |                                         |    |                           |                                 |    |                            |                            |
| 1   | Yes                                                                                         |                                                                                                                                                 |                                                                                                                                                                                                                                                                                                                                                                                                                                                                                                                                                                                                                                                                                                                  |   |                           |                                                                                     |    |                           |                                           |   |                           |                                                                        |    |                            |                                         |    |                           |                                 |    |                            |                            |
| 0   | No                                                                                          |                                                                                                                                                 |                                                                                                                                                                                                                                                                                                                                                                                                                                                                                                                                                                                                                                                                                                                  |   |                           |                                                                                     |    |                           |                                           |   |                           |                                                                        |    |                            |                                         |    |                           |                                 |    |                            |                            |
| 149 | cosm_probl_alop_th_adv_sc<br>Show the field ONLY if:<br>[cosm_probl_alop_th_adv_yn] = '1'   | Please rate your satisfaction with consultation regarding therapy attempts.<br><i>Drag the blue slider and drop it at the desired position.</i> | slider (number), Required<br>Slider labels: 0, 50, 100<br>Custom alignment: RH                                                                                                                                                                                                                                                                                                                                                                                                                                                                                                                                                                                                                                   |   |                           |                                                                                     |    |                           |                                           |   |                           |                                                                        |    |                            |                                         |    |                           |                                 |    |                            |                            |
| 150 | cosm_probl_alop_th_adv_wish<br>Show the field ONLY if:<br>[cosm_probl_alop_th_adv_yn] = '0' | Would you have wished for a consultation by your gynecologist regarding therapy attempts?                                                       | radio, Required<br><table border="1"> <tr> <td>1</td> <td>Yes</td> </tr> <tr> <td>0</td> <td>No</td> </tr> </table>                                                                                                                                                                                                                                                                                                                                                                                                                                                                                                                                                                                              | 1 | Yes                       | 0                                                                                   | No |                           |                                           |   |                           |                                                                        |    |                            |                                         |    |                           |                                 |    |                            |                            |
| 1   | Yes                                                                                         |                                                                                                                                                 |                                                                                                                                                                                                                                                                                                                                                                                                                                                                                                                                                                                                                                                                                                                  |   |                           |                                                                                     |    |                           |                                           |   |                           |                                                                        |    |                            |                                         |    |                           |                                 |    |                            |                            |
| 0   | No                                                                                          |                                                                                                                                                 |                                                                                                                                                                                                                                                                                                                                                                                                                                                                                                                                                                                                                                                                                                                  |   |                           |                                                                                     |    |                           |                                           |   |                           |                                                                        |    |                            |                                         |    |                           |                                 |    |                            |                            |

|     |                                                                                                               |                                                                                                                                                                                                                                |                                                                                                                                                                                                                                                                                                                                                                                                                                                                                                                                                                                                                                                                           |   |                            |                                                                                     |                |                            |                                           |   |                            |                                                                        |    |                             |                                         |    |                            |                                 |    |                             |       |
|-----|---------------------------------------------------------------------------------------------------------------|--------------------------------------------------------------------------------------------------------------------------------------------------------------------------------------------------------------------------------|---------------------------------------------------------------------------------------------------------------------------------------------------------------------------------------------------------------------------------------------------------------------------------------------------------------------------------------------------------------------------------------------------------------------------------------------------------------------------------------------------------------------------------------------------------------------------------------------------------------------------------------------------------------------------|---|----------------------------|-------------------------------------------------------------------------------------|----------------|----------------------------|-------------------------------------------|---|----------------------------|------------------------------------------------------------------------|----|-----------------------------|-----------------------------------------|----|----------------------------|---------------------------------|----|-----------------------------|-------|
| 151 | cosm_probl_hirs_info<br>Show the field ONLY if:<br>[clhy_hirsutism_yn] = '1'                                  | Section Header: <i>hirsutism</i><br>Earlier in this survey you stated to be affected by hirsutism. Please answer following questions about it.                                                                                 | descriptive                                                                                                                                                                                                                                                                                                                                                                                                                                                                                                                                                                                                                                                               |   |                            |                                                                                     |                |                            |                                           |   |                            |                                                                        |    |                             |                                         |    |                            |                                 |    |                             |       |
| 152 | cosm_probl_hirs_bother_yn<br>Show the field ONLY if:<br>[cosm_probl(3)] = '1' or<br>[clhy_hirsutism_yn] = '1' | Does/did your hirsutism bother you?                                                                                                                                                                                            | radio, Required<br><table border="1"> <tr><td>1</td><td>Yes</td></tr> <tr><td>0</td><td>No</td></tr> </table>                                                                                                                                                                                                                                                                                                                                                                                                                                                                                                                                                             | 1 | Yes                        | 0                                                                                   | No             |                            |                                           |   |                            |                                                                        |    |                             |                                         |    |                            |                                 |    |                             |       |
| 1   | Yes                                                                                                           |                                                                                                                                                                                                                                |                                                                                                                                                                                                                                                                                                                                                                                                                                                                                                                                                                                                                                                                           |   |                            |                                                                                     |                |                            |                                           |   |                            |                                                                        |    |                             |                                         |    |                            |                                 |    |                             |       |
| 0   | No                                                                                                            |                                                                                                                                                                                                                                |                                                                                                                                                                                                                                                                                                                                                                                                                                                                                                                                                                                                                                                                           |   |                            |                                                                                     |                |                            |                                           |   |                            |                                                                        |    |                             |                                         |    |                            |                                 |    |                             |       |
| 153 | cosm_probl_hirs_adv_yn<br>Show the field ONLY if:<br>[cosm_probl(3)] = '1' or<br>[clhy_hirsutism_yn] = '1'    | Have you been consultet by your gynecologists about this?                                                                                                                                                                      | radio, Required<br><table border="1"> <tr><td>1</td><td>Yes</td></tr> <tr><td>0</td><td>No</td></tr> </table>                                                                                                                                                                                                                                                                                                                                                                                                                                                                                                                                                             | 1 | Yes                        | 0                                                                                   | No             |                            |                                           |   |                            |                                                                        |    |                             |                                         |    |                            |                                 |    |                             |       |
| 1   | Yes                                                                                                           |                                                                                                                                                                                                                                |                                                                                                                                                                                                                                                                                                                                                                                                                                                                                                                                                                                                                                                                           |   |                            |                                                                                     |                |                            |                                           |   |                            |                                                                        |    |                             |                                         |    |                            |                                 |    |                             |       |
| 0   | No                                                                                                            |                                                                                                                                                                                                                                |                                                                                                                                                                                                                                                                                                                                                                                                                                                                                                                                                                                                                                                                           |   |                            |                                                                                     |                |                            |                                           |   |                            |                                                                        |    |                             |                                         |    |                            |                                 |    |                             |       |
| 154 | cosm_probl_hirs_adv_sc<br>Show the field ONLY if:<br>[cosm_probl_hirs_adv_yn] = '1'                           | Please rate your satisfaction with consultation regarding hirsutism?<br><i>Drag the blue slider and drop it at the desired position.</i>                                                                                       | slider (number), Required<br>Slider labels: 0, 50, 100<br>Custom alignment: RH                                                                                                                                                                                                                                                                                                                                                                                                                                                                                                                                                                                            |   |                            |                                                                                     |                |                            |                                           |   |                            |                                                                        |    |                             |                                         |    |                            |                                 |    |                             |       |
| 155 | cosm_probl_hirs_adv_wish<br>Show the field ONLY if:<br>[cosm_probl_hirs_adv_yn] = '0'                         | Would you have wished for a consultation by your gynecologist regarding hirsutism?                                                                                                                                             | radio, Required<br><table border="1"> <tr><td>1</td><td>Yes</td></tr> <tr><td>0</td><td>No</td></tr> </table>                                                                                                                                                                                                                                                                                                                                                                                                                                                                                                                                                             | 1 | Yes                        | 0                                                                                   | No             |                            |                                           |   |                            |                                                                        |    |                             |                                         |    |                            |                                 |    |                             |       |
| 1   | Yes                                                                                                           |                                                                                                                                                                                                                                |                                                                                                                                                                                                                                                                                                                                                                                                                                                                                                                                                                                                                                                                           |   |                            |                                                                                     |                |                            |                                           |   |                            |                                                                        |    |                             |                                         |    |                            |                                 |    |                             |       |
| 0   | No                                                                                                            |                                                                                                                                                                                                                                |                                                                                                                                                                                                                                                                                                                                                                                                                                                                                                                                                                                                                                                                           |   |                            |                                                                                     |                |                            |                                           |   |                            |                                                                        |    |                             |                                         |    |                            |                                 |    |                             |       |
| 156 | cosm_probl_hirs_th_yn<br>Show the field ONLY if:<br>[cosm_probl(3)] = '1' or<br>[clhy_hirsutism_yn] = '1'     | Have you tried any therapy for hirsutism?                                                                                                                                                                                      | radio, Required<br><table border="1"> <tr><td>1</td><td>Yes</td></tr> <tr><td>0</td><td>No</td></tr> <tr><td>99</td><td>Unknown</td></tr> </table>                                                                                                                                                                                                                                                                                                                                                                                                                                                                                                                        | 1 | Yes                        | 0                                                                                   | No             | 99                         | Unknown                                   |   |                            |                                                                        |    |                             |                                         |    |                            |                                 |    |                             |       |
| 1   | Yes                                                                                                           |                                                                                                                                                                                                                                |                                                                                                                                                                                                                                                                                                                                                                                                                                                                                                                                                                                                                                                                           |   |                            |                                                                                     |                |                            |                                           |   |                            |                                                                        |    |                             |                                         |    |                            |                                 |    |                             |       |
| 0   | No                                                                                                            |                                                                                                                                                                                                                                |                                                                                                                                                                                                                                                                                                                                                                                                                                                                                                                                                                                                                                                                           |   |                            |                                                                                     |                |                            |                                           |   |                            |                                                                        |    |                             |                                         |    |                            |                                 |    |                             |       |
| 99  | Unknown                                                                                                       |                                                                                                                                                                                                                                |                                                                                                                                                                                                                                                                                                                                                                                                                                                                                                                                                                                                                                                                           |   |                            |                                                                                     |                |                            |                                           |   |                            |                                                                        |    |                             |                                         |    |                            |                                 |    |                             |       |
| 157 | cosm_probl_hirs_th_spec<br>Show the field ONLY if:<br>[cosm_probl_hirs_th_yn] = '1'                           | Which therapy method have you tried already?<br><i>If you are not sure about one of the options you can check it to have a look at the sub-categories. If there isn't anything suitable you can unckneck the option again.</i> | checkbox, Required<br><table border="1"> <tr><td>1</td><td>cosm_probl_hirs_th_spec_1</td><td>lifestyle intervention (diet, exercise, etc.)</td></tr> <tr><td>2</td><td>cosm_probl_hirs_th_spec_2</td><td>medication (including contraceptive pill)</td></tr> <tr><td>3</td><td>cosm_probl_hirs_th_spec_3</td><td>psychotherapy</td></tr> <tr><td>4</td><td>cosm_probl_hirs_th_spec_4</td><td>bariatric surgery (e.g. gastric bypass)</td></tr> <tr><td>88</td><td>cosm_probl_hirs_th_spec_88</td><td>other</td></tr> </table>                                                                                                                                             | 1 | cosm_probl_hirs_th_spec_1  | lifestyle intervention (diet, exercise, etc.)                                       | 2              | cosm_probl_hirs_th_spec_2  | medication (including contraceptive pill) | 3 | cosm_probl_hirs_th_spec_3  | psychotherapy                                                          | 4  | cosm_probl_hirs_th_spec_4   | bariatric surgery (e.g. gastric bypass) | 88 | cosm_probl_hirs_th_spec_88 | other                           |    |                             |       |
| 1   | cosm_probl_hirs_th_spec_1                                                                                     | lifestyle intervention (diet, exercise, etc.)                                                                                                                                                                                  |                                                                                                                                                                                                                                                                                                                                                                                                                                                                                                                                                                                                                                                                           |   |                            |                                                                                     |                |                            |                                           |   |                            |                                                                        |    |                             |                                         |    |                            |                                 |    |                             |       |
| 2   | cosm_probl_hirs_th_spec_2                                                                                     | medication (including contraceptive pill)                                                                                                                                                                                      |                                                                                                                                                                                                                                                                                                                                                                                                                                                                                                                                                                                                                                                                           |   |                            |                                                                                     |                |                            |                                           |   |                            |                                                                        |    |                             |                                         |    |                            |                                 |    |                             |       |
| 3   | cosm_probl_hirs_th_spec_3                                                                                     | psychotherapy                                                                                                                                                                                                                  |                                                                                                                                                                                                                                                                                                                                                                                                                                                                                                                                                                                                                                                                           |   |                            |                                                                                     |                |                            |                                           |   |                            |                                                                        |    |                             |                                         |    |                            |                                 |    |                             |       |
| 4   | cosm_probl_hirs_th_spec_4                                                                                     | bariatric surgery (e.g. gastric bypass)                                                                                                                                                                                        |                                                                                                                                                                                                                                                                                                                                                                                                                                                                                                                                                                                                                                                                           |   |                            |                                                                                     |                |                            |                                           |   |                            |                                                                        |    |                             |                                         |    |                            |                                 |    |                             |       |
| 88  | cosm_probl_hirs_th_spec_88                                                                                    | other                                                                                                                                                                                                                          |                                                                                                                                                                                                                                                                                                                                                                                                                                                                                                                                                                                                                                                                           |   |                            |                                                                                     |                |                            |                                           |   |                            |                                                                        |    |                             |                                         |    |                            |                                 |    |                             |       |
| 158 | cosm_probl_hirs_th_spec_88<br>Show the field ONLY if:<br>[cosm_probl_hirs_th_spec(88)] = '1'                  | What other therapeutic options?<br><i>Please specify.</i>                                                                                                                                                                      | notes, Required                                                                                                                                                                                                                                                                                                                                                                                                                                                                                                                                                                                                                                                           |   |                            |                                                                                     |                |                            |                                           |   |                            |                                                                        |    |                             |                                         |    |                            |                                 |    |                             |       |
| 159 | cosm_probl_hirs_th1_spec<br>Show the field ONLY if:<br>[cosm_probl_hirs_th_spec(1)] = '1'                     | Which lifestyle interventions have you tried?                                                                                                                                                                                  | checkbox, Required<br><table border="1"> <tr><td>1</td><td>cosm_probl_hirs_th1_spec_1</td><td>Behavioural interventions (e.g. goal-setting, self-monitoring, slower eating, etc.)</td></tr> <tr><td>2</td><td>cosm_probl_hirs_th1_spec_2</td><td>attitude</td></tr> <tr><td>3</td><td>cosm_probl_hirs_th1_spec_3</td><td>dietary interventions (e.g. well-balanced, reduce energy intake, etc.)</td></tr> <tr><td>4</td><td>cosm_probl_hirs_th1_spec_4</td><td>physical activity</td></tr> <tr><td>5</td><td>cosm_probl_hirs_th1_spec_5</td><td>weight assessment and reduction</td></tr> <tr><td>88</td><td>cosm_probl_hirs_th1_spec_88</td><td>other</td></tr> </table> | 1 | cosm_probl_hirs_th1_spec_1 | Behavioural interventions (e.g. goal-setting, self-monitoring, slower eating, etc.) | 2              | cosm_probl_hirs_th1_spec_2 | attitude                                  | 3 | cosm_probl_hirs_th1_spec_3 | dietary interventions (e.g. well-balanced, reduce energy intake, etc.) | 4  | cosm_probl_hirs_th1_spec_4  | physical activity                       | 5  | cosm_probl_hirs_th1_spec_5 | weight assessment and reduction | 88 | cosm_probl_hirs_th1_spec_88 | other |
| 1   | cosm_probl_hirs_th1_spec_1                                                                                    | Behavioural interventions (e.g. goal-setting, self-monitoring, slower eating, etc.)                                                                                                                                            |                                                                                                                                                                                                                                                                                                                                                                                                                                                                                                                                                                                                                                                                           |   |                            |                                                                                     |                |                            |                                           |   |                            |                                                                        |    |                             |                                         |    |                            |                                 |    |                             |       |
| 2   | cosm_probl_hirs_th1_spec_2                                                                                    | attitude                                                                                                                                                                                                                       |                                                                                                                                                                                                                                                                                                                                                                                                                                                                                                                                                                                                                                                                           |   |                            |                                                                                     |                |                            |                                           |   |                            |                                                                        |    |                             |                                         |    |                            |                                 |    |                             |       |
| 3   | cosm_probl_hirs_th1_spec_3                                                                                    | dietary interventions (e.g. well-balanced, reduce energy intake, etc.)                                                                                                                                                         |                                                                                                                                                                                                                                                                                                                                                                                                                                                                                                                                                                                                                                                                           |   |                            |                                                                                     |                |                            |                                           |   |                            |                                                                        |    |                             |                                         |    |                            |                                 |    |                             |       |
| 4   | cosm_probl_hirs_th1_spec_4                                                                                    | physical activity                                                                                                                                                                                                              |                                                                                                                                                                                                                                                                                                                                                                                                                                                                                                                                                                                                                                                                           |   |                            |                                                                                     |                |                            |                                           |   |                            |                                                                        |    |                             |                                         |    |                            |                                 |    |                             |       |
| 5   | cosm_probl_hirs_th1_spec_5                                                                                    | weight assessment and reduction                                                                                                                                                                                                |                                                                                                                                                                                                                                                                                                                                                                                                                                                                                                                                                                                                                                                                           |   |                            |                                                                                     |                |                            |                                           |   |                            |                                                                        |    |                             |                                         |    |                            |                                 |    |                             |       |
| 88  | cosm_probl_hirs_th1_spec_88                                                                                   | other                                                                                                                                                                                                                          |                                                                                                                                                                                                                                                                                                                                                                                                                                                                                                                                                                                                                                                                           |   |                            |                                                                                     |                |                            |                                           |   |                            |                                                                        |    |                             |                                         |    |                            |                                 |    |                             |       |
| 160 | cosm_probl_hirs_th1_spec_88<br>Show the field ONLY if:<br>[cosm_probl_hirs_th1_spec(88)] = '1'                | What other lifestyle intervention?<br><i>Please specify.</i>                                                                                                                                                                   | notes, Required                                                                                                                                                                                                                                                                                                                                                                                                                                                                                                                                                                                                                                                           |   |                            |                                                                                     |                |                            |                                           |   |                            |                                                                        |    |                             |                                         |    |                            |                                 |    |                             |       |
| 161 | cosm_probl_hirs_th2_spec<br>Show the field ONLY if:<br>[cosm_probl_hirs_th_spec(2)] = '1'                     | Please select the applicable medications:                                                                                                                                                                                      | checkbox, Required<br><table border="1"> <tr><td>1</td><td>cosm_probl_hirs_th2_spec_1</td><td>contraceptive pill</td></tr> <tr><td>2</td><td>cosm_probl_hirs_th2_spec_2</td><td>anti-androgens</td></tr> <tr><td>3</td><td>cosm_probl_hirs_th2_spec_3</td><td>metformin</td></tr> <tr><td>88</td><td>cosm_probl_hirs_th2_spec_88</td><td>other</td></tr> </table>                                                                                                                                                                                                                                                                                                         | 1 | cosm_probl_hirs_th2_spec_1 | contraceptive pill                                                                  | 2              | cosm_probl_hirs_th2_spec_2 | anti-androgens                            | 3 | cosm_probl_hirs_th2_spec_3 | metformin                                                              | 88 | cosm_probl_hirs_th2_spec_88 | other                                   |    |                            |                                 |    |                             |       |
| 1   | cosm_probl_hirs_th2_spec_1                                                                                    | contraceptive pill                                                                                                                                                                                                             |                                                                                                                                                                                                                                                                                                                                                                                                                                                                                                                                                                                                                                                                           |   |                            |                                                                                     |                |                            |                                           |   |                            |                                                                        |    |                             |                                         |    |                            |                                 |    |                             |       |
| 2   | cosm_probl_hirs_th2_spec_2                                                                                    | anti-androgens                                                                                                                                                                                                                 |                                                                                                                                                                                                                                                                                                                                                                                                                                                                                                                                                                                                                                                                           |   |                            |                                                                                     |                |                            |                                           |   |                            |                                                                        |    |                             |                                         |    |                            |                                 |    |                             |       |
| 3   | cosm_probl_hirs_th2_spec_3                                                                                    | metformin                                                                                                                                                                                                                      |                                                                                                                                                                                                                                                                                                                                                                                                                                                                                                                                                                                                                                                                           |   |                            |                                                                                     |                |                            |                                           |   |                            |                                                                        |    |                             |                                         |    |                            |                                 |    |                             |       |
| 88  | cosm_probl_hirs_th2_spec_88                                                                                   | other                                                                                                                                                                                                                          |                                                                                                                                                                                                                                                                                                                                                                                                                                                                                                                                                                                                                                                                           |   |                            |                                                                                     |                |                            |                                           |   |                            |                                                                        |    |                             |                                         |    |                            |                                 |    |                             |       |
| 162 | cosm_probl_hirs_th2_spec_88<br>Show the field ONLY if:<br>[cosm_probl_hirs_th2_spec(88)] = '1'                | What other medication?<br><i>Please specify.</i>                                                                                                                                                                               | notes, Required                                                                                                                                                                                                                                                                                                                                                                                                                                                                                                                                                                                                                                                           |   |                            |                                                                                     |                |                            |                                           |   |                            |                                                                        |    |                             |                                         |    |                            |                                 |    |                             |       |
| 163 | cosm_probl_hirs_th_effect<br>Show the field ONLY if:<br>[cosm_probl_hirs_th_yn] = '1'                         | Were the therapy attempts effective?                                                                                                                                                                                           | dropdown, Required<br><table border="1"> <tr><td>1</td><td>Yes, completely</td></tr> <tr><td>2</td><td>Yes, partially</td></tr> <tr><td>0</td><td>No, not at all</td></tr> </table>                                                                                                                                                                                                                                                                                                                                                                                                                                                                                       | 1 | Yes, completely            | 2                                                                                   | Yes, partially | 0                          | No, not at all                            |   |                            |                                                                        |    |                             |                                         |    |                            |                                 |    |                             |       |
| 1   | Yes, completely                                                                                               |                                                                                                                                                                                                                                |                                                                                                                                                                                                                                                                                                                                                                                                                                                                                                                                                                                                                                                                           |   |                            |                                                                                     |                |                            |                                           |   |                            |                                                                        |    |                             |                                         |    |                            |                                 |    |                             |       |
| 2   | Yes, partially                                                                                                |                                                                                                                                                                                                                                |                                                                                                                                                                                                                                                                                                                                                                                                                                                                                                                                                                                                                                                                           |   |                            |                                                                                     |                |                            |                                           |   |                            |                                                                        |    |                             |                                         |    |                            |                                 |    |                             |       |
| 0   | No, not at all                                                                                                |                                                                                                                                                                                                                                |                                                                                                                                                                                                                                                                                                                                                                                                                                                                                                                                                                                                                                                                           |   |                            |                                                                                     |                |                            |                                           |   |                            |                                                                        |    |                             |                                         |    |                            |                                 |    |                             |       |
| 164 | cosm_probl_hirs_th_act<br>Show the field ONLY if:<br>[cosm_probl_hirs_th_yn] = '1'                            | Which of the therapy methods are you still currently implementing?                                                                                                                                                             | checkbox, Required<br><table border="1"> <tr><td>1</td><td>cosm_probl_hirs_th_act_1</td><td>lifestyle intervention (diet, exercise, etc.)</td></tr> </table>                                                                                                                                                                                                                                                                                                                                                                                                                                                                                                              | 1 | cosm_probl_hirs_th_act_1   | lifestyle intervention (diet, exercise, etc.)                                       |                |                            |                                           |   |                            |                                                                        |    |                             |                                         |    |                            |                                 |    |                             |       |
| 1   | cosm_probl_hirs_th_act_1                                                                                      | lifestyle intervention (diet, exercise, etc.)                                                                                                                                                                                  |                                                                                                                                                                                                                                                                                                                                                                                                                                                                                                                                                                                                                                                                           |   |                            |                                                                                     |                |                            |                                           |   |                            |                                                                        |    |                             |                                         |    |                            |                                 |    |                             |       |

|     |                                                                                             |                                                                                                                                                 |                                                                                                                                                                                                                                                                                                                                                                                                                                                                                                                                                                                                                                                                                                                      |   |                           |                                                                                     |    |                           |                |   |                           |                                                                        |    |                            |                            |   |                           |                                 |    |                            |                            |
|-----|---------------------------------------------------------------------------------------------|-------------------------------------------------------------------------------------------------------------------------------------------------|----------------------------------------------------------------------------------------------------------------------------------------------------------------------------------------------------------------------------------------------------------------------------------------------------------------------------------------------------------------------------------------------------------------------------------------------------------------------------------------------------------------------------------------------------------------------------------------------------------------------------------------------------------------------------------------------------------------------|---|---------------------------|-------------------------------------------------------------------------------------|----|---------------------------|----------------|---|---------------------------|------------------------------------------------------------------------|----|----------------------------|----------------------------|---|---------------------------|---------------------------------|----|----------------------------|----------------------------|
|     |                                                                                             |                                                                                                                                                 | <table border="1"> <tr> <td>2</td> <td>cosm_probl_hirs_th_act_2</td> <td>medication (including contraceptive pill)</td> </tr> <tr> <td>3</td> <td>cosm_probl_hirs_th_act_3</td> <td>psychotherapy</td> </tr> <tr> <td>4</td> <td>cosm_probl_hirs_th_act_4</td> <td>bariatric surgery (e.g. gastric bypass)</td> </tr> <tr> <td>88</td> <td>cosm_probl_hirs_th_act_88</td> <td>other</td> </tr> <tr> <td>0</td> <td>cosm_probl_hirs_th_act_0</td> <td>no therapy anymore</td> </tr> </table> <p>Field Annotation: @NONEOFTHEABOVE=0</p>                                                                                                                                                                               | 2 | cosm_probl_hirs_th_act_2  | medication (including contraceptive pill)                                           | 3  | cosm_probl_hirs_th_act_3  | psychotherapy  | 4 | cosm_probl_hirs_th_act_4  | bariatric surgery (e.g. gastric bypass)                                | 88 | cosm_probl_hirs_th_act_88  | other                      | 0 | cosm_probl_hirs_th_act_0  | no therapy anymore              |    |                            |                            |
| 2   | cosm_probl_hirs_th_act_2                                                                    | medication (including contraceptive pill)                                                                                                       |                                                                                                                                                                                                                                                                                                                                                                                                                                                                                                                                                                                                                                                                                                                      |   |                           |                                                                                     |    |                           |                |   |                           |                                                                        |    |                            |                            |   |                           |                                 |    |                            |                            |
| 3   | cosm_probl_hirs_th_act_3                                                                    | psychotherapy                                                                                                                                   |                                                                                                                                                                                                                                                                                                                                                                                                                                                                                                                                                                                                                                                                                                                      |   |                           |                                                                                     |    |                           |                |   |                           |                                                                        |    |                            |                            |   |                           |                                 |    |                            |                            |
| 4   | cosm_probl_hirs_th_act_4                                                                    | bariatric surgery (e.g. gastric bypass)                                                                                                         |                                                                                                                                                                                                                                                                                                                                                                                                                                                                                                                                                                                                                                                                                                                      |   |                           |                                                                                     |    |                           |                |   |                           |                                                                        |    |                            |                            |   |                           |                                 |    |                            |                            |
| 88  | cosm_probl_hirs_th_act_88                                                                   | other                                                                                                                                           |                                                                                                                                                                                                                                                                                                                                                                                                                                                                                                                                                                                                                                                                                                                      |   |                           |                                                                                     |    |                           |                |   |                           |                                                                        |    |                            |                            |   |                           |                                 |    |                            |                            |
| 0   | cosm_probl_hirs_th_act_0                                                                    | no therapy anymore                                                                                                                              |                                                                                                                                                                                                                                                                                                                                                                                                                                                                                                                                                                                                                                                                                                                      |   |                           |                                                                                     |    |                           |                |   |                           |                                                                        |    |                            |                            |   |                           |                                 |    |                            |                            |
| 165 | cosm_probl_hirs_th1_act<br>Show the field ONLY if:<br>[cosm_probl_hirs_th_act(1)] = '1'     | Please select the lifestyle interventions you are still currently performing:                                                                   | <p>checkbox, Required</p> <table border="1"> <tr> <td>1</td> <td>cosm_probl_hirs_th1_act_1</td> <td>Behavioural interventions (e.g. goal-setting, self-monitoring, slower eating, etc.)</td> </tr> <tr> <td>2</td> <td>cosm_probl_hirs_th1_act_2</td> <td>attitude</td> </tr> <tr> <td>3</td> <td>cosm_probl_hirs_th1_act_3</td> <td>dietary interventions (e.g. well-balanced, reduce energy intake, etc.)</td> </tr> <tr> <td>4</td> <td>cosm_probl_hirs_th1_act_4</td> <td>physical activity</td> </tr> <tr> <td>5</td> <td>cosm_probl_hirs_th1_act_5</td> <td>weight assessment and reduction</td> </tr> <tr> <td>88</td> <td>cosm_probl_hirs_th1_act_88</td> <td>other (as described above)</td> </tr> </table> | 1 | cosm_probl_hirs_th1_act_1 | Behavioural interventions (e.g. goal-setting, self-monitoring, slower eating, etc.) | 2  | cosm_probl_hirs_th1_act_2 | attitude       | 3 | cosm_probl_hirs_th1_act_3 | dietary interventions (e.g. well-balanced, reduce energy intake, etc.) | 4  | cosm_probl_hirs_th1_act_4  | physical activity          | 5 | cosm_probl_hirs_th1_act_5 | weight assessment and reduction | 88 | cosm_probl_hirs_th1_act_88 | other (as described above) |
| 1   | cosm_probl_hirs_th1_act_1                                                                   | Behavioural interventions (e.g. goal-setting, self-monitoring, slower eating, etc.)                                                             |                                                                                                                                                                                                                                                                                                                                                                                                                                                                                                                                                                                                                                                                                                                      |   |                           |                                                                                     |    |                           |                |   |                           |                                                                        |    |                            |                            |   |                           |                                 |    |                            |                            |
| 2   | cosm_probl_hirs_th1_act_2                                                                   | attitude                                                                                                                                        |                                                                                                                                                                                                                                                                                                                                                                                                                                                                                                                                                                                                                                                                                                                      |   |                           |                                                                                     |    |                           |                |   |                           |                                                                        |    |                            |                            |   |                           |                                 |    |                            |                            |
| 3   | cosm_probl_hirs_th1_act_3                                                                   | dietary interventions (e.g. well-balanced, reduce energy intake, etc.)                                                                          |                                                                                                                                                                                                                                                                                                                                                                                                                                                                                                                                                                                                                                                                                                                      |   |                           |                                                                                     |    |                           |                |   |                           |                                                                        |    |                            |                            |   |                           |                                 |    |                            |                            |
| 4   | cosm_probl_hirs_th1_act_4                                                                   | physical activity                                                                                                                               |                                                                                                                                                                                                                                                                                                                                                                                                                                                                                                                                                                                                                                                                                                                      |   |                           |                                                                                     |    |                           |                |   |                           |                                                                        |    |                            |                            |   |                           |                                 |    |                            |                            |
| 5   | cosm_probl_hirs_th1_act_5                                                                   | weight assessment and reduction                                                                                                                 |                                                                                                                                                                                                                                                                                                                                                                                                                                                                                                                                                                                                                                                                                                                      |   |                           |                                                                                     |    |                           |                |   |                           |                                                                        |    |                            |                            |   |                           |                                 |    |                            |                            |
| 88  | cosm_probl_hirs_th1_act_88                                                                  | other (as described above)                                                                                                                      |                                                                                                                                                                                                                                                                                                                                                                                                                                                                                                                                                                                                                                                                                                                      |   |                           |                                                                                     |    |                           |                |   |                           |                                                                        |    |                            |                            |   |                           |                                 |    |                            |                            |
| 166 | cosm_probl_hirs_th2_act<br>Show the field ONLY if:<br>[cosm_probl_hirs_th_act(2)] = '1'     | Please select the medication you are still currently taking:                                                                                    | <p>checkbox, Required</p> <table border="1"> <tr> <td>1</td> <td>cosm_probl_hirs_th2_act_1</td> <td>contraceptive pill</td> </tr> <tr> <td>2</td> <td>cosm_probl_hirs_th2_act_2</td> <td>anti-androgens</td> </tr> <tr> <td>3</td> <td>cosm_probl_hirs_th2_act_3</td> <td>metformin</td> </tr> <tr> <td>88</td> <td>cosm_probl_hirs_th2_act_88</td> <td>other (as described above)</td> </tr> </table>                                                                                                                                                                                                                                                                                                               | 1 | cosm_probl_hirs_th2_act_1 | contraceptive pill                                                                  | 2  | cosm_probl_hirs_th2_act_2 | anti-androgens | 3 | cosm_probl_hirs_th2_act_3 | metformin                                                              | 88 | cosm_probl_hirs_th2_act_88 | other (as described above) |   |                           |                                 |    |                            |                            |
| 1   | cosm_probl_hirs_th2_act_1                                                                   | contraceptive pill                                                                                                                              |                                                                                                                                                                                                                                                                                                                                                                                                                                                                                                                                                                                                                                                                                                                      |   |                           |                                                                                     |    |                           |                |   |                           |                                                                        |    |                            |                            |   |                           |                                 |    |                            |                            |
| 2   | cosm_probl_hirs_th2_act_2                                                                   | anti-androgens                                                                                                                                  |                                                                                                                                                                                                                                                                                                                                                                                                                                                                                                                                                                                                                                                                                                                      |   |                           |                                                                                     |    |                           |                |   |                           |                                                                        |    |                            |                            |   |                           |                                 |    |                            |                            |
| 3   | cosm_probl_hirs_th2_act_3                                                                   | metformin                                                                                                                                       |                                                                                                                                                                                                                                                                                                                                                                                                                                                                                                                                                                                                                                                                                                                      |   |                           |                                                                                     |    |                           |                |   |                           |                                                                        |    |                            |                            |   |                           |                                 |    |                            |                            |
| 88  | cosm_probl_hirs_th2_act_88                                                                  | other (as described above)                                                                                                                      |                                                                                                                                                                                                                                                                                                                                                                                                                                                                                                                                                                                                                                                                                                                      |   |                           |                                                                                     |    |                           |                |   |                           |                                                                        |    |                            |                            |   |                           |                                 |    |                            |                            |
| 167 | cosm_probl_hirs_th_adv_yn<br>Show the field ONLY if:<br>[cosm_probl_hirs_th_yn] = '1'       | Have you been consulted by your gynecologist regarding the therapy attempts?                                                                    | <p>radio, Required</p> <table border="1"> <tr> <td>1</td> <td>Yes</td> </tr> <tr> <td>0</td> <td>No</td> </tr> </table>                                                                                                                                                                                                                                                                                                                                                                                                                                                                                                                                                                                              | 1 | Yes                       | 0                                                                                   | No |                           |                |   |                           |                                                                        |    |                            |                            |   |                           |                                 |    |                            |                            |
| 1   | Yes                                                                                         |                                                                                                                                                 |                                                                                                                                                                                                                                                                                                                                                                                                                                                                                                                                                                                                                                                                                                                      |   |                           |                                                                                     |    |                           |                |   |                           |                                                                        |    |                            |                            |   |                           |                                 |    |                            |                            |
| 0   | No                                                                                          |                                                                                                                                                 |                                                                                                                                                                                                                                                                                                                                                                                                                                                                                                                                                                                                                                                                                                                      |   |                           |                                                                                     |    |                           |                |   |                           |                                                                        |    |                            |                            |   |                           |                                 |    |                            |                            |
| 168 | cosm_probl_hirs_th_adv_sc<br>Show the field ONLY if:<br>[cosm_probl_hirs_th_adv_yn] = '1'   | Please rate your satisfaction with consultation regarding therapy attempts.<br><i>Drag the blue slider and drop it at the desired position.</i> | <p>slider (number), Required<br/>Slider labels: 0, 50, 100<br/>Custom alignment: RH</p>                                                                                                                                                                                                                                                                                                                                                                                                                                                                                                                                                                                                                              |   |                           |                                                                                     |    |                           |                |   |                           |                                                                        |    |                            |                            |   |                           |                                 |    |                            |                            |
| 169 | cosm_probl_hirs_th_adv_wish<br>Show the field ONLY if:<br>[cosm_probl_hirs_th_adv_yn] = '0' | Would you have wished for a consultation by your gynecologist regarding therapy attempts?                                                       | <p>radio, Required</p> <table border="1"> <tr> <td>1</td> <td>Yes</td> </tr> <tr> <td>0</td> <td>No</td> </tr> </table>                                                                                                                                                                                                                                                                                                                                                                                                                                                                                                                                                                                              | 1 | Yes                       | 0                                                                                   | No |                           |                |   |                           |                                                                        |    |                            |                            |   |                           |                                 |    |                            |                            |
| 1   | Yes                                                                                         |                                                                                                                                                 |                                                                                                                                                                                                                                                                                                                                                                                                                                                                                                                                                                                                                                                                                                                      |   |                           |                                                                                     |    |                           |                |   |                           |                                                                        |    |                            |                            |   |                           |                                 |    |                            |                            |
| 0   | No                                                                                          |                                                                                                                                                 |                                                                                                                                                                                                                                                                                                                                                                                                                                                                                                                                                                                                                                                                                                                      |   |                           |                                                                                     |    |                           |                |   |                           |                                                                        |    |                            |                            |   |                           |                                 |    |                            |                            |

|     |                                                                                             |                                                                                                                                                                                                                               |                                                                                                                                                                                                                                                                                                                                                                                                                                                                                                                                                                                                                                                                           |   |                            |                                                                                     |    |                            |                                           |   |                            |                                                                        |    |                             |                                         |    |                            |                                 |    |                             |       |
|-----|---------------------------------------------------------------------------------------------|-------------------------------------------------------------------------------------------------------------------------------------------------------------------------------------------------------------------------------|---------------------------------------------------------------------------------------------------------------------------------------------------------------------------------------------------------------------------------------------------------------------------------------------------------------------------------------------------------------------------------------------------------------------------------------------------------------------------------------------------------------------------------------------------------------------------------------------------------------------------------------------------------------------------|---|----------------------------|-------------------------------------------------------------------------------------|----|----------------------------|-------------------------------------------|---|----------------------------|------------------------------------------------------------------------|----|-----------------------------|-----------------------------------------|----|----------------------------|---------------------------------|----|-----------------------------|-------|
| 170 | cosm_probl_adip_info1<br>Show the field ONLY if: [bmi] >= 25 and [bmi] < 30                 | Section Header: <i>overweight</i><br>According to the calculation of your BMI, you suffer from slight overweight. Please answer the following questions about it.                                                             | descriptive                                                                                                                                                                                                                                                                                                                                                                                                                                                                                                                                                                                                                                                               |   |                            |                                                                                     |    |                            |                                           |   |                            |                                                                        |    |                             |                                         |    |                            |                                 |    |                             |       |
| 171 | cosm_probl_adip_info2<br>Show the field ONLY if: [bmi] >= 30 and [bmi] < 40                 | According to the calculation of your BMI, you suffer from moderate overweight. Please answer the following questions about it.                                                                                                | descriptive                                                                                                                                                                                                                                                                                                                                                                                                                                                                                                                                                                                                                                                               |   |                            |                                                                                     |    |                            |                                           |   |                            |                                                                        |    |                             |                                         |    |                            |                                 |    |                             |       |
| 172 | cosm_probl_adip_info3<br>Show the field ONLY if: [bmi] >= 40                                | According to the calculation of your BMI, you suffer from severe overweight. Please answer the following questions about it.                                                                                                  | descriptive                                                                                                                                                                                                                                                                                                                                                                                                                                                                                                                                                                                                                                                               |   |                            |                                                                                     |    |                            |                                           |   |                            |                                                                        |    |                             |                                         |    |                            |                                 |    |                             |       |
| 173 | cosm_probl_adip_bother_yn<br>Show the field ONLY if: [cosm_probl(4)] = '1' or [bmi] >= 25   | Does/did your overweight bother you?                                                                                                                                                                                          | radio, Required<br><table border="1"> <tr><td>1</td><td>Yes</td></tr> <tr><td>0</td><td>No</td></tr> </table>                                                                                                                                                                                                                                                                                                                                                                                                                                                                                                                                                             | 1 | Yes                        | 0                                                                                   | No |                            |                                           |   |                            |                                                                        |    |                             |                                         |    |                            |                                 |    |                             |       |
| 1   | Yes                                                                                         |                                                                                                                                                                                                                               |                                                                                                                                                                                                                                                                                                                                                                                                                                                                                                                                                                                                                                                                           |   |                            |                                                                                     |    |                            |                                           |   |                            |                                                                        |    |                             |                                         |    |                            |                                 |    |                             |       |
| 0   | No                                                                                          |                                                                                                                                                                                                                               |                                                                                                                                                                                                                                                                                                                                                                                                                                                                                                                                                                                                                                                                           |   |                            |                                                                                     |    |                            |                                           |   |                            |                                                                        |    |                             |                                         |    |                            |                                 |    |                             |       |
| 174 | cosm_probl_adip_adv_yn<br>Show the field ONLY if: [cosm_probl(4)] = '1' or [bmi] >= 25      | Have you been consulted by your gynecologists about this?                                                                                                                                                                     | radio, Required<br><table border="1"> <tr><td>1</td><td>Yes</td></tr> <tr><td>0</td><td>No</td></tr> </table>                                                                                                                                                                                                                                                                                                                                                                                                                                                                                                                                                             | 1 | Yes                        | 0                                                                                   | No |                            |                                           |   |                            |                                                                        |    |                             |                                         |    |                            |                                 |    |                             |       |
| 1   | Yes                                                                                         |                                                                                                                                                                                                                               |                                                                                                                                                                                                                                                                                                                                                                                                                                                                                                                                                                                                                                                                           |   |                            |                                                                                     |    |                            |                                           |   |                            |                                                                        |    |                             |                                         |    |                            |                                 |    |                             |       |
| 0   | No                                                                                          |                                                                                                                                                                                                                               |                                                                                                                                                                                                                                                                                                                                                                                                                                                                                                                                                                                                                                                                           |   |                            |                                                                                     |    |                            |                                           |   |                            |                                                                        |    |                             |                                         |    |                            |                                 |    |                             |       |
| 175 | cosm_probl_adip_adv_sc<br>Show the field ONLY if: [cosm_probl_adip_adv_yn] = '1'            | Please rate your satisfaction with consultation regarding overweight?<br><i>Drag the blue slider and drop it at the desired position.</i>                                                                                     | slider (number), Required<br>Slider labels: 0, 50, 100<br>Custom alignment: RH                                                                                                                                                                                                                                                                                                                                                                                                                                                                                                                                                                                            |   |                            |                                                                                     |    |                            |                                           |   |                            |                                                                        |    |                             |                                         |    |                            |                                 |    |                             |       |
| 176 | cosm_probl_adip_adv_wish<br>Show the field ONLY if: [cosm_probl_adip_adv_yn] = '0'          | Would you have wished for a consultation by your gynecologist regarding overweight?                                                                                                                                           | radio, Required<br><table border="1"> <tr><td>1</td><td>Yes</td></tr> <tr><td>0</td><td>No</td></tr> </table>                                                                                                                                                                                                                                                                                                                                                                                                                                                                                                                                                             | 1 | Yes                        | 0                                                                                   | No |                            |                                           |   |                            |                                                                        |    |                             |                                         |    |                            |                                 |    |                             |       |
| 1   | Yes                                                                                         |                                                                                                                                                                                                                               |                                                                                                                                                                                                                                                                                                                                                                                                                                                                                                                                                                                                                                                                           |   |                            |                                                                                     |    |                            |                                           |   |                            |                                                                        |    |                             |                                         |    |                            |                                 |    |                             |       |
| 0   | No                                                                                          |                                                                                                                                                                                                                               |                                                                                                                                                                                                                                                                                                                                                                                                                                                                                                                                                                                                                                                                           |   |                            |                                                                                     |    |                            |                                           |   |                            |                                                                        |    |                             |                                         |    |                            |                                 |    |                             |       |
| 177 | cosm_probl_adip_th_yn<br>Show the field ONLY if: [cosm_probl(4)] = '1' or [bmi] >= 25       | Have you tried any therapy for overweight?                                                                                                                                                                                    | radio, Required<br><table border="1"> <tr><td>1</td><td>Yes</td></tr> <tr><td>0</td><td>No</td></tr> <tr><td>99</td><td>Unknown</td></tr> </table>                                                                                                                                                                                                                                                                                                                                                                                                                                                                                                                        | 1 | Yes                        | 0                                                                                   | No | 99                         | Unknown                                   |   |                            |                                                                        |    |                             |                                         |    |                            |                                 |    |                             |       |
| 1   | Yes                                                                                         |                                                                                                                                                                                                                               |                                                                                                                                                                                                                                                                                                                                                                                                                                                                                                                                                                                                                                                                           |   |                            |                                                                                     |    |                            |                                           |   |                            |                                                                        |    |                             |                                         |    |                            |                                 |    |                             |       |
| 0   | No                                                                                          |                                                                                                                                                                                                                               |                                                                                                                                                                                                                                                                                                                                                                                                                                                                                                                                                                                                                                                                           |   |                            |                                                                                     |    |                            |                                           |   |                            |                                                                        |    |                             |                                         |    |                            |                                 |    |                             |       |
| 99  | Unknown                                                                                     |                                                                                                                                                                                                                               |                                                                                                                                                                                                                                                                                                                                                                                                                                                                                                                                                                                                                                                                           |   |                            |                                                                                     |    |                            |                                           |   |                            |                                                                        |    |                             |                                         |    |                            |                                 |    |                             |       |
| 178 | cosm_probl_adip_th_spec<br>Show the field ONLY if: [cosm_probl_adip_th_yn] = '1'            | Which therapy method have you tried already?<br><i>If you are not sure about one of the options you can check it to have a look at the sub-categories. If there isn't anything suitable you can uncheck the option again.</i> | checkbox, Required<br><table border="1"> <tr><td>1</td><td>cosm_probl_adip_th_spec_1</td><td>lifestyle intervention (diet, exercise, etc.)</td></tr> <tr><td>2</td><td>cosm_probl_adip_th_spec_2</td><td>medication (including contraceptive pill)</td></tr> <tr><td>3</td><td>cosm_probl_adip_th_spec_3</td><td>psychotherapy</td></tr> <tr><td>4</td><td>cosm_probl_adip_th_spec_4</td><td>bariatric surgery (e.g. gastric bypass)</td></tr> <tr><td>88</td><td>cosm_probl_adip_th_spec_88</td><td>other</td></tr> </table>                                                                                                                                             | 1 | cosm_probl_adip_th_spec_1  | lifestyle intervention (diet, exercise, etc.)                                       | 2  | cosm_probl_adip_th_spec_2  | medication (including contraceptive pill) | 3 | cosm_probl_adip_th_spec_3  | psychotherapy                                                          | 4  | cosm_probl_adip_th_spec_4   | bariatric surgery (e.g. gastric bypass) | 88 | cosm_probl_adip_th_spec_88 | other                           |    |                             |       |
| 1   | cosm_probl_adip_th_spec_1                                                                   | lifestyle intervention (diet, exercise, etc.)                                                                                                                                                                                 |                                                                                                                                                                                                                                                                                                                                                                                                                                                                                                                                                                                                                                                                           |   |                            |                                                                                     |    |                            |                                           |   |                            |                                                                        |    |                             |                                         |    |                            |                                 |    |                             |       |
| 2   | cosm_probl_adip_th_spec_2                                                                   | medication (including contraceptive pill)                                                                                                                                                                                     |                                                                                                                                                                                                                                                                                                                                                                                                                                                                                                                                                                                                                                                                           |   |                            |                                                                                     |    |                            |                                           |   |                            |                                                                        |    |                             |                                         |    |                            |                                 |    |                             |       |
| 3   | cosm_probl_adip_th_spec_3                                                                   | psychotherapy                                                                                                                                                                                                                 |                                                                                                                                                                                                                                                                                                                                                                                                                                                                                                                                                                                                                                                                           |   |                            |                                                                                     |    |                            |                                           |   |                            |                                                                        |    |                             |                                         |    |                            |                                 |    |                             |       |
| 4   | cosm_probl_adip_th_spec_4                                                                   | bariatric surgery (e.g. gastric bypass)                                                                                                                                                                                       |                                                                                                                                                                                                                                                                                                                                                                                                                                                                                                                                                                                                                                                                           |   |                            |                                                                                     |    |                            |                                           |   |                            |                                                                        |    |                             |                                         |    |                            |                                 |    |                             |       |
| 88  | cosm_probl_adip_th_spec_88                                                                  | other                                                                                                                                                                                                                         |                                                                                                                                                                                                                                                                                                                                                                                                                                                                                                                                                                                                                                                                           |   |                            |                                                                                     |    |                            |                                           |   |                            |                                                                        |    |                             |                                         |    |                            |                                 |    |                             |       |
| 179 | cosm_probl_adip_th_spec_88<br>Show the field ONLY if: [cosm_probl_adip_th_spec(88)] = '1'   | What other therapeutic options?<br><i>Please specify.</i>                                                                                                                                                                     | notes, Required                                                                                                                                                                                                                                                                                                                                                                                                                                                                                                                                                                                                                                                           |   |                            |                                                                                     |    |                            |                                           |   |                            |                                                                        |    |                             |                                         |    |                            |                                 |    |                             |       |
| 180 | cosm_probl_adip_th1_spec<br>Show the field ONLY if: [cosm_probl_adip_th_spec(1)] = '1'      | Which lifestyle interventions have you tried?                                                                                                                                                                                 | checkbox, Required<br><table border="1"> <tr><td>1</td><td>cosm_probl_adip_th1_spec_1</td><td>Behavioural interventions (e.g. goal-setting, self-monitoring, slower eating, etc.)</td></tr> <tr><td>2</td><td>cosm_probl_adip_th1_spec_2</td><td>attitude</td></tr> <tr><td>3</td><td>cosm_probl_adip_th1_spec_3</td><td>dietary interventions (e.g. well-balanced, reduce energy intake, etc.)</td></tr> <tr><td>4</td><td>cosm_probl_adip_th1_spec_4</td><td>physical activity</td></tr> <tr><td>5</td><td>cosm_probl_adip_th1_spec_5</td><td>weight assessment and reduction</td></tr> <tr><td>88</td><td>cosm_probl_adip_th1_spec_88</td><td>other</td></tr> </table> | 1 | cosm_probl_adip_th1_spec_1 | Behavioural interventions (e.g. goal-setting, self-monitoring, slower eating, etc.) | 2  | cosm_probl_adip_th1_spec_2 | attitude                                  | 3 | cosm_probl_adip_th1_spec_3 | dietary interventions (e.g. well-balanced, reduce energy intake, etc.) | 4  | cosm_probl_adip_th1_spec_4  | physical activity                       | 5  | cosm_probl_adip_th1_spec_5 | weight assessment and reduction | 88 | cosm_probl_adip_th1_spec_88 | other |
| 1   | cosm_probl_adip_th1_spec_1                                                                  | Behavioural interventions (e.g. goal-setting, self-monitoring, slower eating, etc.)                                                                                                                                           |                                                                                                                                                                                                                                                                                                                                                                                                                                                                                                                                                                                                                                                                           |   |                            |                                                                                     |    |                            |                                           |   |                            |                                                                        |    |                             |                                         |    |                            |                                 |    |                             |       |
| 2   | cosm_probl_adip_th1_spec_2                                                                  | attitude                                                                                                                                                                                                                      |                                                                                                                                                                                                                                                                                                                                                                                                                                                                                                                                                                                                                                                                           |   |                            |                                                                                     |    |                            |                                           |   |                            |                                                                        |    |                             |                                         |    |                            |                                 |    |                             |       |
| 3   | cosm_probl_adip_th1_spec_3                                                                  | dietary interventions (e.g. well-balanced, reduce energy intake, etc.)                                                                                                                                                        |                                                                                                                                                                                                                                                                                                                                                                                                                                                                                                                                                                                                                                                                           |   |                            |                                                                                     |    |                            |                                           |   |                            |                                                                        |    |                             |                                         |    |                            |                                 |    |                             |       |
| 4   | cosm_probl_adip_th1_spec_4                                                                  | physical activity                                                                                                                                                                                                             |                                                                                                                                                                                                                                                                                                                                                                                                                                                                                                                                                                                                                                                                           |   |                            |                                                                                     |    |                            |                                           |   |                            |                                                                        |    |                             |                                         |    |                            |                                 |    |                             |       |
| 5   | cosm_probl_adip_th1_spec_5                                                                  | weight assessment and reduction                                                                                                                                                                                               |                                                                                                                                                                                                                                                                                                                                                                                                                                                                                                                                                                                                                                                                           |   |                            |                                                                                     |    |                            |                                           |   |                            |                                                                        |    |                             |                                         |    |                            |                                 |    |                             |       |
| 88  | cosm_probl_adip_th1_spec_88                                                                 | other                                                                                                                                                                                                                         |                                                                                                                                                                                                                                                                                                                                                                                                                                                                                                                                                                                                                                                                           |   |                            |                                                                                     |    |                            |                                           |   |                            |                                                                        |    |                             |                                         |    |                            |                                 |    |                             |       |
| 181 | cosm_probl_adip_th1_spec_88<br>Show the field ONLY if: [cosm_probl_adip_th1_spec(88)] = '1' | What other lifestyle intervention?<br><i>Please specify.</i>                                                                                                                                                                  | notes, Required                                                                                                                                                                                                                                                                                                                                                                                                                                                                                                                                                                                                                                                           |   |                            |                                                                                     |    |                            |                                           |   |                            |                                                                        |    |                             |                                         |    |                            |                                 |    |                             |       |
| 182 | cosm_probl_adip_th2_spec<br>Show the field ONLY if: [cosm_probl_adip_th_spec(2)] = '1'      | Please select the applicable medications:                                                                                                                                                                                     | checkbox, Required<br><table border="1"> <tr><td>1</td><td>cosm_probl_adip_th2_spec_1</td><td>contraceptive pill</td></tr> <tr><td>2</td><td>cosm_probl_adip_th2_spec_2</td><td>anti-androgens</td></tr> <tr><td>3</td><td>cosm_probl_adip_th2_spec_3</td><td>metformin</td></tr> <tr><td>88</td><td>cosm_probl_adip_th2_spec_88</td><td>other</td></tr> </table>                                                                                                                                                                                                                                                                                                         | 1 | cosm_probl_adip_th2_spec_1 | contraceptive pill                                                                  | 2  | cosm_probl_adip_th2_spec_2 | anti-androgens                            | 3 | cosm_probl_adip_th2_spec_3 | metformin                                                              | 88 | cosm_probl_adip_th2_spec_88 | other                                   |    |                            |                                 |    |                             |       |
| 1   | cosm_probl_adip_th2_spec_1                                                                  | contraceptive pill                                                                                                                                                                                                            |                                                                                                                                                                                                                                                                                                                                                                                                                                                                                                                                                                                                                                                                           |   |                            |                                                                                     |    |                            |                                           |   |                            |                                                                        |    |                             |                                         |    |                            |                                 |    |                             |       |
| 2   | cosm_probl_adip_th2_spec_2                                                                  | anti-androgens                                                                                                                                                                                                                |                                                                                                                                                                                                                                                                                                                                                                                                                                                                                                                                                                                                                                                                           |   |                            |                                                                                     |    |                            |                                           |   |                            |                                                                        |    |                             |                                         |    |                            |                                 |    |                             |       |
| 3   | cosm_probl_adip_th2_spec_3                                                                  | metformin                                                                                                                                                                                                                     |                                                                                                                                                                                                                                                                                                                                                                                                                                                                                                                                                                                                                                                                           |   |                            |                                                                                     |    |                            |                                           |   |                            |                                                                        |    |                             |                                         |    |                            |                                 |    |                             |       |
| 88  | cosm_probl_adip_th2_spec_88                                                                 | other                                                                                                                                                                                                                         |                                                                                                                                                                                                                                                                                                                                                                                                                                                                                                                                                                                                                                                                           |   |                            |                                                                                     |    |                            |                                           |   |                            |                                                                        |    |                             |                                         |    |                            |                                 |    |                             |       |
| 183 | cosm_probl_adip_th2_spec_88<br>Show the field ONLY if: [cosm_probl_adip_th2_spec(88)] = '1' | What other medication?<br><i>Please specify.</i>                                                                                                                                                                              | notes, Required                                                                                                                                                                                                                                                                                                                                                                                                                                                                                                                                                                                                                                                           |   |                            |                                                                                     |    |                            |                                           |   |                            |                                                                        |    |                             |                                         |    |                            |                                 |    |                             |       |
| 184 | cosm_probl_adip_th_effect<br>Show the field ONLY if: [cosm_probl_adip_th_yn] = '1'          | Were the therapy attempts effective?                                                                                                                                                                                          | dropdown, Required<br><table border="1"> <tr><td>1</td><td>Yes, completely</td></tr> </table>                                                                                                                                                                                                                                                                                                                                                                                                                                                                                                                                                                             | 1 | Yes, completely            |                                                                                     |    |                            |                                           |   |                            |                                                                        |    |                             |                                         |    |                            |                                 |    |                             |       |
| 1   | Yes, completely                                                                             |                                                                                                                                                                                                                               |                                                                                                                                                                                                                                                                                                                                                                                                                                                                                                                                                                                                                                                                           |   |                            |                                                                                     |    |                            |                                           |   |                            |                                                                        |    |                             |                                         |    |                            |                                 |    |                             |       |

|     |                                                                                                         |                                                                                                                                                            |                                                                                                                                                                                                                                                                                                                                                                                                                                                                                                                                                                                                                                                                                                                      |   |                           |                                                                                     |                |                           |                                           |   |                           |                                                                        |    |                            |                                         |    |                           |                                 |    |                            |                            |
|-----|---------------------------------------------------------------------------------------------------------|------------------------------------------------------------------------------------------------------------------------------------------------------------|----------------------------------------------------------------------------------------------------------------------------------------------------------------------------------------------------------------------------------------------------------------------------------------------------------------------------------------------------------------------------------------------------------------------------------------------------------------------------------------------------------------------------------------------------------------------------------------------------------------------------------------------------------------------------------------------------------------------|---|---------------------------|-------------------------------------------------------------------------------------|----------------|---------------------------|-------------------------------------------|---|---------------------------|------------------------------------------------------------------------|----|----------------------------|-----------------------------------------|----|---------------------------|---------------------------------|----|----------------------------|----------------------------|
|     |                                                                                                         |                                                                                                                                                            | <table border="1"> <tr> <td>2</td> <td>Yes, partially</td> </tr> <tr> <td>0</td> <td>No, not at all</td> </tr> </table>                                                                                                                                                                                                                                                                                                                                                                                                                                                                                                                                                                                              | 2 | Yes, partially            | 0                                                                                   | No, not at all |                           |                                           |   |                           |                                                                        |    |                            |                                         |    |                           |                                 |    |                            |                            |
| 2   | Yes, partially                                                                                          |                                                                                                                                                            |                                                                                                                                                                                                                                                                                                                                                                                                                                                                                                                                                                                                                                                                                                                      |   |                           |                                                                                     |                |                           |                                           |   |                           |                                                                        |    |                            |                                         |    |                           |                                 |    |                            |                            |
| 0   | No, not at all                                                                                          |                                                                                                                                                            |                                                                                                                                                                                                                                                                                                                                                                                                                                                                                                                                                                                                                                                                                                                      |   |                           |                                                                                     |                |                           |                                           |   |                           |                                                                        |    |                            |                                         |    |                           |                                 |    |                            |                            |
| 185 | <p>cosm_probl_adip_th_act</p> <p>Show the field ONLY if:<br/>[cosm_probl_adip_th_yn] = '1'</p>          | <p>Which of the therapy methods are you still currently implementing?</p>                                                                                  | <p>checkbox, Required</p> <table border="1"> <tr> <td>1</td> <td>cosm_probl_adip_th_act_1</td> <td>lifestyle intervention (diet, exercise, etc.)</td> </tr> <tr> <td>2</td> <td>cosm_probl_adip_th_act_2</td> <td>medication (including contraceptive pill)</td> </tr> <tr> <td>3</td> <td>cosm_probl_adip_th_act_3</td> <td>psychotherapy</td> </tr> <tr> <td>4</td> <td>cosm_probl_adip_th_act_4</td> <td>bariatric surgery (e.g. gastric bypass)</td> </tr> <tr> <td>88</td> <td>cosm_probl_adip_th_act_88</td> <td>other</td> </tr> <tr> <td>0</td> <td>cosm_probl_adip_th_act_0</td> <td>no therapy anymore</td> </tr> </table> <p>Field Annotation: @NONEOFTHEABOVE=0</p>                                      | 1 | cosm_probl_adip_th_act_1  | lifestyle intervention (diet, exercise, etc.)                                       | 2              | cosm_probl_adip_th_act_2  | medication (including contraceptive pill) | 3 | cosm_probl_adip_th_act_3  | psychotherapy                                                          | 4  | cosm_probl_adip_th_act_4   | bariatric surgery (e.g. gastric bypass) | 88 | cosm_probl_adip_th_act_88 | other                           | 0  | cosm_probl_adip_th_act_0   | no therapy anymore         |
| 1   | cosm_probl_adip_th_act_1                                                                                | lifestyle intervention (diet, exercise, etc.)                                                                                                              |                                                                                                                                                                                                                                                                                                                                                                                                                                                                                                                                                                                                                                                                                                                      |   |                           |                                                                                     |                |                           |                                           |   |                           |                                                                        |    |                            |                                         |    |                           |                                 |    |                            |                            |
| 2   | cosm_probl_adip_th_act_2                                                                                | medication (including contraceptive pill)                                                                                                                  |                                                                                                                                                                                                                                                                                                                                                                                                                                                                                                                                                                                                                                                                                                                      |   |                           |                                                                                     |                |                           |                                           |   |                           |                                                                        |    |                            |                                         |    |                           |                                 |    |                            |                            |
| 3   | cosm_probl_adip_th_act_3                                                                                | psychotherapy                                                                                                                                              |                                                                                                                                                                                                                                                                                                                                                                                                                                                                                                                                                                                                                                                                                                                      |   |                           |                                                                                     |                |                           |                                           |   |                           |                                                                        |    |                            |                                         |    |                           |                                 |    |                            |                            |
| 4   | cosm_probl_adip_th_act_4                                                                                | bariatric surgery (e.g. gastric bypass)                                                                                                                    |                                                                                                                                                                                                                                                                                                                                                                                                                                                                                                                                                                                                                                                                                                                      |   |                           |                                                                                     |                |                           |                                           |   |                           |                                                                        |    |                            |                                         |    |                           |                                 |    |                            |                            |
| 88  | cosm_probl_adip_th_act_88                                                                               | other                                                                                                                                                      |                                                                                                                                                                                                                                                                                                                                                                                                                                                                                                                                                                                                                                                                                                                      |   |                           |                                                                                     |                |                           |                                           |   |                           |                                                                        |    |                            |                                         |    |                           |                                 |    |                            |                            |
| 0   | cosm_probl_adip_th_act_0                                                                                | no therapy anymore                                                                                                                                         |                                                                                                                                                                                                                                                                                                                                                                                                                                                                                                                                                                                                                                                                                                                      |   |                           |                                                                                     |                |                           |                                           |   |                           |                                                                        |    |                            |                                         |    |                           |                                 |    |                            |                            |
| 186 | <p>cosm_probl_adip_th1_act</p> <p>Show the field ONLY if:<br/>[cosm_probl_adip_th_act(1)] = '1'</p>     | <p>Please select the lifestyle interventions you are still currently performing:</p>                                                                       | <p>checkbox, Required</p> <table border="1"> <tr> <td>1</td> <td>cosm_probl_adip_th1_act_1</td> <td>Behavioural interventions (e.g. goal-setting, self-monitoring, slower eating, etc.)</td> </tr> <tr> <td>2</td> <td>cosm_probl_adip_th1_act_2</td> <td>attitude</td> </tr> <tr> <td>3</td> <td>cosm_probl_adip_th1_act_3</td> <td>dietary interventions (e.g. well-balanced, reduce energy intake, etc.)</td> </tr> <tr> <td>4</td> <td>cosm_probl_adip_th1_act_4</td> <td>physical activity</td> </tr> <tr> <td>5</td> <td>cosm_probl_adip_th1_act_5</td> <td>weight assessment and reduction</td> </tr> <tr> <td>88</td> <td>cosm_probl_adip_th1_act_88</td> <td>other (as described above)</td> </tr> </table> | 1 | cosm_probl_adip_th1_act_1 | Behavioural interventions (e.g. goal-setting, self-monitoring, slower eating, etc.) | 2              | cosm_probl_adip_th1_act_2 | attitude                                  | 3 | cosm_probl_adip_th1_act_3 | dietary interventions (e.g. well-balanced, reduce energy intake, etc.) | 4  | cosm_probl_adip_th1_act_4  | physical activity                       | 5  | cosm_probl_adip_th1_act_5 | weight assessment and reduction | 88 | cosm_probl_adip_th1_act_88 | other (as described above) |
| 1   | cosm_probl_adip_th1_act_1                                                                               | Behavioural interventions (e.g. goal-setting, self-monitoring, slower eating, etc.)                                                                        |                                                                                                                                                                                                                                                                                                                                                                                                                                                                                                                                                                                                                                                                                                                      |   |                           |                                                                                     |                |                           |                                           |   |                           |                                                                        |    |                            |                                         |    |                           |                                 |    |                            |                            |
| 2   | cosm_probl_adip_th1_act_2                                                                               | attitude                                                                                                                                                   |                                                                                                                                                                                                                                                                                                                                                                                                                                                                                                                                                                                                                                                                                                                      |   |                           |                                                                                     |                |                           |                                           |   |                           |                                                                        |    |                            |                                         |    |                           |                                 |    |                            |                            |
| 3   | cosm_probl_adip_th1_act_3                                                                               | dietary interventions (e.g. well-balanced, reduce energy intake, etc.)                                                                                     |                                                                                                                                                                                                                                                                                                                                                                                                                                                                                                                                                                                                                                                                                                                      |   |                           |                                                                                     |                |                           |                                           |   |                           |                                                                        |    |                            |                                         |    |                           |                                 |    |                            |                            |
| 4   | cosm_probl_adip_th1_act_4                                                                               | physical activity                                                                                                                                          |                                                                                                                                                                                                                                                                                                                                                                                                                                                                                                                                                                                                                                                                                                                      |   |                           |                                                                                     |                |                           |                                           |   |                           |                                                                        |    |                            |                                         |    |                           |                                 |    |                            |                            |
| 5   | cosm_probl_adip_th1_act_5                                                                               | weight assessment and reduction                                                                                                                            |                                                                                                                                                                                                                                                                                                                                                                                                                                                                                                                                                                                                                                                                                                                      |   |                           |                                                                                     |                |                           |                                           |   |                           |                                                                        |    |                            |                                         |    |                           |                                 |    |                            |                            |
| 88  | cosm_probl_adip_th1_act_88                                                                              | other (as described above)                                                                                                                                 |                                                                                                                                                                                                                                                                                                                                                                                                                                                                                                                                                                                                                                                                                                                      |   |                           |                                                                                     |                |                           |                                           |   |                           |                                                                        |    |                            |                                         |    |                           |                                 |    |                            |                            |
| 187 | <p>cosm_probl_adip_th2_act</p> <p>Show the field ONLY if:<br/>[cosm_probl_adip_th_act(2)] = '1'</p>     | <p>Please select the medication you are still currently taking:</p>                                                                                        | <p>checkbox, Required</p> <table border="1"> <tr> <td>1</td> <td>cosm_probl_adip_th2_act_1</td> <td>contraceptive pill</td> </tr> <tr> <td>2</td> <td>cosm_probl_adip_th2_act_2</td> <td>anti-androgens</td> </tr> <tr> <td>3</td> <td>cosm_probl_adip_th2_act_3</td> <td>metformin</td> </tr> <tr> <td>88</td> <td>cosm_probl_adip_th2_act_88</td> <td>other (as described above)</td> </tr> </table>                                                                                                                                                                                                                                                                                                               | 1 | cosm_probl_adip_th2_act_1 | contraceptive pill                                                                  | 2              | cosm_probl_adip_th2_act_2 | anti-androgens                            | 3 | cosm_probl_adip_th2_act_3 | metformin                                                              | 88 | cosm_probl_adip_th2_act_88 | other (as described above)              |    |                           |                                 |    |                            |                            |
| 1   | cosm_probl_adip_th2_act_1                                                                               | contraceptive pill                                                                                                                                         |                                                                                                                                                                                                                                                                                                                                                                                                                                                                                                                                                                                                                                                                                                                      |   |                           |                                                                                     |                |                           |                                           |   |                           |                                                                        |    |                            |                                         |    |                           |                                 |    |                            |                            |
| 2   | cosm_probl_adip_th2_act_2                                                                               | anti-androgens                                                                                                                                             |                                                                                                                                                                                                                                                                                                                                                                                                                                                                                                                                                                                                                                                                                                                      |   |                           |                                                                                     |                |                           |                                           |   |                           |                                                                        |    |                            |                                         |    |                           |                                 |    |                            |                            |
| 3   | cosm_probl_adip_th2_act_3                                                                               | metformin                                                                                                                                                  |                                                                                                                                                                                                                                                                                                                                                                                                                                                                                                                                                                                                                                                                                                                      |   |                           |                                                                                     |                |                           |                                           |   |                           |                                                                        |    |                            |                                         |    |                           |                                 |    |                            |                            |
| 88  | cosm_probl_adip_th2_act_88                                                                              | other (as described above)                                                                                                                                 |                                                                                                                                                                                                                                                                                                                                                                                                                                                                                                                                                                                                                                                                                                                      |   |                           |                                                                                     |                |                           |                                           |   |                           |                                                                        |    |                            |                                         |    |                           |                                 |    |                            |                            |
| 188 | <p>cosm_probl_adip_th_adv_yn</p> <p>Show the field ONLY if:<br/>[cosm_probl_adip_th_yn] = '1'</p>       | <p>Have you been consulted by your gynecologist regarding the therapy attempts?</p>                                                                        | <p>radio, Required</p> <table border="1"> <tr> <td>1</td> <td>Yes</td> </tr> <tr> <td>0</td> <td>No</td> </tr> </table>                                                                                                                                                                                                                                                                                                                                                                                                                                                                                                                                                                                              | 1 | Yes                       | 0                                                                                   | No             |                           |                                           |   |                           |                                                                        |    |                            |                                         |    |                           |                                 |    |                            |                            |
| 1   | Yes                                                                                                     |                                                                                                                                                            |                                                                                                                                                                                                                                                                                                                                                                                                                                                                                                                                                                                                                                                                                                                      |   |                           |                                                                                     |                |                           |                                           |   |                           |                                                                        |    |                            |                                         |    |                           |                                 |    |                            |                            |
| 0   | No                                                                                                      |                                                                                                                                                            |                                                                                                                                                                                                                                                                                                                                                                                                                                                                                                                                                                                                                                                                                                                      |   |                           |                                                                                     |                |                           |                                           |   |                           |                                                                        |    |                            |                                         |    |                           |                                 |    |                            |                            |
| 189 | <p>cosm_probl_adip_th_adv_sc</p> <p>Show the field ONLY if:<br/>[cosm_probl_adip_th_adv_yn] = '1'</p>   | <p>Please rate your satisfaction with consultation regarding therapy attempts.</p> <p><i>Drag the blue slider and drop it at the desired position.</i></p> | <p>slider (number), Required</p> <p>Slider labels: 0, 50, 100</p> <p>Custom alignment: RH</p>                                                                                                                                                                                                                                                                                                                                                                                                                                                                                                                                                                                                                        |   |                           |                                                                                     |                |                           |                                           |   |                           |                                                                        |    |                            |                                         |    |                           |                                 |    |                            |                            |
| 190 | <p>cosm_probl_adip_th_adv_wish</p> <p>Show the field ONLY if:<br/>[cosm_probl_adip_th_adv_yn] = '0'</p> | <p>Would you have wished for a consultation by your gynecologist regarding therapy attempts?</p>                                                           | <p>radio, Required</p> <table border="1"> <tr> <td>1</td> <td>Yes</td> </tr> <tr> <td>0</td> <td>No</td> </tr> </table>                                                                                                                                                                                                                                                                                                                                                                                                                                                                                                                                                                                              | 1 | Yes                       | 0                                                                                   | No             |                           |                                           |   |                           |                                                                        |    |                            |                                         |    |                           |                                 |    |                            |                            |
| 1   | Yes                                                                                                     |                                                                                                                                                            |                                                                                                                                                                                                                                                                                                                                                                                                                                                                                                                                                                                                                                                                                                                      |   |                           |                                                                                     |                |                           |                                           |   |                           |                                                                        |    |                            |                                         |    |                           |                                 |    |                            |                            |
| 0   | No                                                                                                      |                                                                                                                                                            |                                                                                                                                                                                                                                                                                                                                                                                                                                                                                                                                                                                                                                                                                                                      |   |                           |                                                                                     |                |                           |                                           |   |                           |                                                                        |    |                            |                                         |    |                           |                                 |    |                            |                            |

|     |                                                                                              |                                                                                                                                                                                                                               |                                                                                                                                                                                                                                                                                                                                                                                                                                                                                                                                                                                                                                                                     |   |                           |                                                                                     |                |                           |                                           |   |                           |                                                                        |    |                            |                                         |    |                           |                                 |    |                            |       |
|-----|----------------------------------------------------------------------------------------------|-------------------------------------------------------------------------------------------------------------------------------------------------------------------------------------------------------------------------------|---------------------------------------------------------------------------------------------------------------------------------------------------------------------------------------------------------------------------------------------------------------------------------------------------------------------------------------------------------------------------------------------------------------------------------------------------------------------------------------------------------------------------------------------------------------------------------------------------------------------------------------------------------------------|---|---------------------------|-------------------------------------------------------------------------------------|----------------|---------------------------|-------------------------------------------|---|---------------------------|------------------------------------------------------------------------|----|----------------------------|-----------------------------------------|----|---------------------------|---------------------------------|----|----------------------------|-------|
| 191 | cosm_probl_oth_bother_yn<br>Show the field ONLY if:<br>[cosm_probl(88)] = '1'                | Section Header: <i>other</i><br>You have selected to suffer from another cosmetic problem. You have described this problem in the text field above. Does/did this problem bother you?                                         | radio, Required<br><table border="1"> <tr><td>1</td><td>Yes</td></tr> <tr><td>0</td><td>No</td></tr> </table>                                                                                                                                                                                                                                                                                                                                                                                                                                                                                                                                                       | 1 | Yes                       | 0                                                                                   | No             |                           |                                           |   |                           |                                                                        |    |                            |                                         |    |                           |                                 |    |                            |       |
| 1   | Yes                                                                                          |                                                                                                                                                                                                                               |                                                                                                                                                                                                                                                                                                                                                                                                                                                                                                                                                                                                                                                                     |   |                           |                                                                                     |                |                           |                                           |   |                           |                                                                        |    |                            |                                         |    |                           |                                 |    |                            |       |
| 0   | No                                                                                           |                                                                                                                                                                                                                               |                                                                                                                                                                                                                                                                                                                                                                                                                                                                                                                                                                                                                                                                     |   |                           |                                                                                     |                |                           |                                           |   |                           |                                                                        |    |                            |                                         |    |                           |                                 |    |                            |       |
| 192 | cosm_probl_oth_adv_yn<br>Show the field ONLY if:<br>[cosm_probl(88)] = '1'                   | Have you been consulted by your gynecologists about this?                                                                                                                                                                     | radio, Required<br><table border="1"> <tr><td>1</td><td>Yes</td></tr> <tr><td>0</td><td>No</td></tr> </table>                                                                                                                                                                                                                                                                                                                                                                                                                                                                                                                                                       | 1 | Yes                       | 0                                                                                   | No             |                           |                                           |   |                           |                                                                        |    |                            |                                         |    |                           |                                 |    |                            |       |
| 1   | Yes                                                                                          |                                                                                                                                                                                                                               |                                                                                                                                                                                                                                                                                                                                                                                                                                                                                                                                                                                                                                                                     |   |                           |                                                                                     |                |                           |                                           |   |                           |                                                                        |    |                            |                                         |    |                           |                                 |    |                            |       |
| 0   | No                                                                                           |                                                                                                                                                                                                                               |                                                                                                                                                                                                                                                                                                                                                                                                                                                                                                                                                                                                                                                                     |   |                           |                                                                                     |                |                           |                                           |   |                           |                                                                        |    |                            |                                         |    |                           |                                 |    |                            |       |
| 193 | cosm_probl_oth_adv_sc<br>[cosm_probl_oth_adv_yn] = '1'                                       | Please rate your satisfaction with consultation regarding your other problem?<br><i>Drag the blue slider and drop it at the desired position.</i>                                                                             | slider (number), Required<br>Slider labels: 0, 50, 100<br>Custom alignment: RH                                                                                                                                                                                                                                                                                                                                                                                                                                                                                                                                                                                      |   |                           |                                                                                     |                |                           |                                           |   |                           |                                                                        |    |                            |                                         |    |                           |                                 |    |                            |       |
| 194 | cosm_probl_oth_adv_wish<br>Show the field ONLY if:<br>[cosm_probl_oth_adv_yn] = '0'          | Would you have wished for a consultation by your gynecologist regarding your other problem?                                                                                                                                   | radio, Required<br><table border="1"> <tr><td>1</td><td>Yes</td></tr> <tr><td>0</td><td>No</td></tr> </table>                                                                                                                                                                                                                                                                                                                                                                                                                                                                                                                                                       | 1 | Yes                       | 0                                                                                   | No             |                           |                                           |   |                           |                                                                        |    |                            |                                         |    |                           |                                 |    |                            |       |
| 1   | Yes                                                                                          |                                                                                                                                                                                                                               |                                                                                                                                                                                                                                                                                                                                                                                                                                                                                                                                                                                                                                                                     |   |                           |                                                                                     |                |                           |                                           |   |                           |                                                                        |    |                            |                                         |    |                           |                                 |    |                            |       |
| 0   | No                                                                                           |                                                                                                                                                                                                                               |                                                                                                                                                                                                                                                                                                                                                                                                                                                                                                                                                                                                                                                                     |   |                           |                                                                                     |                |                           |                                           |   |                           |                                                                        |    |                            |                                         |    |                           |                                 |    |                            |       |
| 195 | cosm_probl_oth_th_yn<br>Show the field ONLY if:<br>[cosm_probl(88)] = '1'                    | Have you tried any therapy for your other problem (as described above)?                                                                                                                                                       | radio, Required<br><table border="1"> <tr><td>1</td><td>Yes</td></tr> <tr><td>0</td><td>No</td></tr> <tr><td>99</td><td>Unknown</td></tr> </table>                                                                                                                                                                                                                                                                                                                                                                                                                                                                                                                  | 1 | Yes                       | 0                                                                                   | No             | 99                        | Unknown                                   |   |                           |                                                                        |    |                            |                                         |    |                           |                                 |    |                            |       |
| 1   | Yes                                                                                          |                                                                                                                                                                                                                               |                                                                                                                                                                                                                                                                                                                                                                                                                                                                                                                                                                                                                                                                     |   |                           |                                                                                     |                |                           |                                           |   |                           |                                                                        |    |                            |                                         |    |                           |                                 |    |                            |       |
| 0   | No                                                                                           |                                                                                                                                                                                                                               |                                                                                                                                                                                                                                                                                                                                                                                                                                                                                                                                                                                                                                                                     |   |                           |                                                                                     |                |                           |                                           |   |                           |                                                                        |    |                            |                                         |    |                           |                                 |    |                            |       |
| 99  | Unknown                                                                                      |                                                                                                                                                                                                                               |                                                                                                                                                                                                                                                                                                                                                                                                                                                                                                                                                                                                                                                                     |   |                           |                                                                                     |                |                           |                                           |   |                           |                                                                        |    |                            |                                         |    |                           |                                 |    |                            |       |
| 196 | cosm_probl_oth_th_spec<br>Show the field ONLY if:<br>[cosm_probl_oth_th_yn] = '1'            | Which therapy method have you tried already?<br><i>If you are not sure about one of the options you can check it to have a look at the sub-categories. If there isn't anything suitable you can uncheck the option again.</i> | checkbox, Required<br><table border="1"> <tr><td>1</td><td>cosm_probl_oth_th_spec_1</td><td>lifestyle intervention (diet, exercise, etc.)</td></tr> <tr><td>2</td><td>cosm_probl_oth_th_spec_2</td><td>medication (including contraceptive pill)</td></tr> <tr><td>3</td><td>cosm_probl_oth_th_spec_3</td><td>psychotherapy</td></tr> <tr><td>4</td><td>cosm_probl_oth_th_spec_4</td><td>bariatric surgery (e.g. gastric bypass)</td></tr> <tr><td>88</td><td>cosm_probl_oth_th_spec_88</td><td>other</td></tr> </table>                                                                                                                                            | 1 | cosm_probl_oth_th_spec_1  | lifestyle intervention (diet, exercise, etc.)                                       | 2              | cosm_probl_oth_th_spec_2  | medication (including contraceptive pill) | 3 | cosm_probl_oth_th_spec_3  | psychotherapy                                                          | 4  | cosm_probl_oth_th_spec_4   | bariatric surgery (e.g. gastric bypass) | 88 | cosm_probl_oth_th_spec_88 | other                           |    |                            |       |
| 1   | cosm_probl_oth_th_spec_1                                                                     | lifestyle intervention (diet, exercise, etc.)                                                                                                                                                                                 |                                                                                                                                                                                                                                                                                                                                                                                                                                                                                                                                                                                                                                                                     |   |                           |                                                                                     |                |                           |                                           |   |                           |                                                                        |    |                            |                                         |    |                           |                                 |    |                            |       |
| 2   | cosm_probl_oth_th_spec_2                                                                     | medication (including contraceptive pill)                                                                                                                                                                                     |                                                                                                                                                                                                                                                                                                                                                                                                                                                                                                                                                                                                                                                                     |   |                           |                                                                                     |                |                           |                                           |   |                           |                                                                        |    |                            |                                         |    |                           |                                 |    |                            |       |
| 3   | cosm_probl_oth_th_spec_3                                                                     | psychotherapy                                                                                                                                                                                                                 |                                                                                                                                                                                                                                                                                                                                                                                                                                                                                                                                                                                                                                                                     |   |                           |                                                                                     |                |                           |                                           |   |                           |                                                                        |    |                            |                                         |    |                           |                                 |    |                            |       |
| 4   | cosm_probl_oth_th_spec_4                                                                     | bariatric surgery (e.g. gastric bypass)                                                                                                                                                                                       |                                                                                                                                                                                                                                                                                                                                                                                                                                                                                                                                                                                                                                                                     |   |                           |                                                                                     |                |                           |                                           |   |                           |                                                                        |    |                            |                                         |    |                           |                                 |    |                            |       |
| 88  | cosm_probl_oth_th_spec_88                                                                    | other                                                                                                                                                                                                                         |                                                                                                                                                                                                                                                                                                                                                                                                                                                                                                                                                                                                                                                                     |   |                           |                                                                                     |                |                           |                                           |   |                           |                                                                        |    |                            |                                         |    |                           |                                 |    |                            |       |
| 197 | cosm_probl_oth_th_spec_88<br>Show the field ONLY if:<br>[cosm_probl_oth_th_spec(88)] = '1'   | What other therapeutic options?<br><i>Please specify.</i>                                                                                                                                                                     | notes, Required                                                                                                                                                                                                                                                                                                                                                                                                                                                                                                                                                                                                                                                     |   |                           |                                                                                     |                |                           |                                           |   |                           |                                                                        |    |                            |                                         |    |                           |                                 |    |                            |       |
| 198 | cosm_probl_oth_th1_spec<br>Show the field ONLY if:<br>[cosm_probl_oth_th_spec(1)] = '1'      | Which lifestyle interventions have you tried?                                                                                                                                                                                 | checkbox, Required<br><table border="1"> <tr><td>1</td><td>cosm_probl_oth_th1_spec_1</td><td>Behavioural interventions (e.g. goal-setting, self-monitoring, slower eating, etc.)</td></tr> <tr><td>2</td><td>cosm_probl_oth_th1_spec_2</td><td>attitude</td></tr> <tr><td>3</td><td>cosm_probl_oth_th1_spec_3</td><td>dietary interventions (e.g. well-balanced, reduce energy intake, etc.)</td></tr> <tr><td>4</td><td>cosm_probl_oth_th1_spec_4</td><td>physical activity</td></tr> <tr><td>5</td><td>cosm_probl_oth_th1_spec_5</td><td>weight assessment and reduction</td></tr> <tr><td>88</td><td>cosm_probl_oth_th1_spec_88</td><td>other</td></tr> </table> | 1 | cosm_probl_oth_th1_spec_1 | Behavioural interventions (e.g. goal-setting, self-monitoring, slower eating, etc.) | 2              | cosm_probl_oth_th1_spec_2 | attitude                                  | 3 | cosm_probl_oth_th1_spec_3 | dietary interventions (e.g. well-balanced, reduce energy intake, etc.) | 4  | cosm_probl_oth_th1_spec_4  | physical activity                       | 5  | cosm_probl_oth_th1_spec_5 | weight assessment and reduction | 88 | cosm_probl_oth_th1_spec_88 | other |
| 1   | cosm_probl_oth_th1_spec_1                                                                    | Behavioural interventions (e.g. goal-setting, self-monitoring, slower eating, etc.)                                                                                                                                           |                                                                                                                                                                                                                                                                                                                                                                                                                                                                                                                                                                                                                                                                     |   |                           |                                                                                     |                |                           |                                           |   |                           |                                                                        |    |                            |                                         |    |                           |                                 |    |                            |       |
| 2   | cosm_probl_oth_th1_spec_2                                                                    | attitude                                                                                                                                                                                                                      |                                                                                                                                                                                                                                                                                                                                                                                                                                                                                                                                                                                                                                                                     |   |                           |                                                                                     |                |                           |                                           |   |                           |                                                                        |    |                            |                                         |    |                           |                                 |    |                            |       |
| 3   | cosm_probl_oth_th1_spec_3                                                                    | dietary interventions (e.g. well-balanced, reduce energy intake, etc.)                                                                                                                                                        |                                                                                                                                                                                                                                                                                                                                                                                                                                                                                                                                                                                                                                                                     |   |                           |                                                                                     |                |                           |                                           |   |                           |                                                                        |    |                            |                                         |    |                           |                                 |    |                            |       |
| 4   | cosm_probl_oth_th1_spec_4                                                                    | physical activity                                                                                                                                                                                                             |                                                                                                                                                                                                                                                                                                                                                                                                                                                                                                                                                                                                                                                                     |   |                           |                                                                                     |                |                           |                                           |   |                           |                                                                        |    |                            |                                         |    |                           |                                 |    |                            |       |
| 5   | cosm_probl_oth_th1_spec_5                                                                    | weight assessment and reduction                                                                                                                                                                                               |                                                                                                                                                                                                                                                                                                                                                                                                                                                                                                                                                                                                                                                                     |   |                           |                                                                                     |                |                           |                                           |   |                           |                                                                        |    |                            |                                         |    |                           |                                 |    |                            |       |
| 88  | cosm_probl_oth_th1_spec_88                                                                   | other                                                                                                                                                                                                                         |                                                                                                                                                                                                                                                                                                                                                                                                                                                                                                                                                                                                                                                                     |   |                           |                                                                                     |                |                           |                                           |   |                           |                                                                        |    |                            |                                         |    |                           |                                 |    |                            |       |
| 199 | cosm_probl_oth_th1_spec_88<br>Show the field ONLY if:<br>[cosm_probl_oth_th1_spec(88)] = '1' | What other lifestyle intervention?<br><i>Please specify.</i>                                                                                                                                                                  | notes, Required                                                                                                                                                                                                                                                                                                                                                                                                                                                                                                                                                                                                                                                     |   |                           |                                                                                     |                |                           |                                           |   |                           |                                                                        |    |                            |                                         |    |                           |                                 |    |                            |       |
| 200 | cosm_probl_oth_th2_spec<br>Show the field ONLY if:<br>[cosm_probl_oth_th_spec(2)] = '1'      | Please select the applicable medications:                                                                                                                                                                                     | checkbox, Required<br><table border="1"> <tr><td>1</td><td>cosm_probl_oth_th2_spec_1</td><td>contraceptive pill</td></tr> <tr><td>2</td><td>cosm_probl_oth_th2_spec_2</td><td>anti-androgens</td></tr> <tr><td>3</td><td>cosm_probl_oth_th2_spec_3</td><td>metformin</td></tr> <tr><td>88</td><td>cosm_probl_oth_th2_spec_88</td><td>other</td></tr> </table>                                                                                                                                                                                                                                                                                                       | 1 | cosm_probl_oth_th2_spec_1 | contraceptive pill                                                                  | 2              | cosm_probl_oth_th2_spec_2 | anti-androgens                            | 3 | cosm_probl_oth_th2_spec_3 | metformin                                                              | 88 | cosm_probl_oth_th2_spec_88 | other                                   |    |                           |                                 |    |                            |       |
| 1   | cosm_probl_oth_th2_spec_1                                                                    | contraceptive pill                                                                                                                                                                                                            |                                                                                                                                                                                                                                                                                                                                                                                                                                                                                                                                                                                                                                                                     |   |                           |                                                                                     |                |                           |                                           |   |                           |                                                                        |    |                            |                                         |    |                           |                                 |    |                            |       |
| 2   | cosm_probl_oth_th2_spec_2                                                                    | anti-androgens                                                                                                                                                                                                                |                                                                                                                                                                                                                                                                                                                                                                                                                                                                                                                                                                                                                                                                     |   |                           |                                                                                     |                |                           |                                           |   |                           |                                                                        |    |                            |                                         |    |                           |                                 |    |                            |       |
| 3   | cosm_probl_oth_th2_spec_3                                                                    | metformin                                                                                                                                                                                                                     |                                                                                                                                                                                                                                                                                                                                                                                                                                                                                                                                                                                                                                                                     |   |                           |                                                                                     |                |                           |                                           |   |                           |                                                                        |    |                            |                                         |    |                           |                                 |    |                            |       |
| 88  | cosm_probl_oth_th2_spec_88                                                                   | other                                                                                                                                                                                                                         |                                                                                                                                                                                                                                                                                                                                                                                                                                                                                                                                                                                                                                                                     |   |                           |                                                                                     |                |                           |                                           |   |                           |                                                                        |    |                            |                                         |    |                           |                                 |    |                            |       |
| 201 | cosm_probl_oth_th2_spec_88<br>Show the field ONLY if:<br>[cosm_probl_oth_th2_spec(88)] = '1' | What other medication?<br><i>Please specify.</i>                                                                                                                                                                              | notes, Required                                                                                                                                                                                                                                                                                                                                                                                                                                                                                                                                                                                                                                                     |   |                           |                                                                                     |                |                           |                                           |   |                           |                                                                        |    |                            |                                         |    |                           |                                 |    |                            |       |
| 202 | cosm_probl_oth_th_effect<br>Show the field ONLY if:<br>[cosm_probl_oth_th_yn] = '1'          | Were the therapy attempts effective?                                                                                                                                                                                          | dropdown, Required<br><table border="1"> <tr><td>1</td><td>Yes, completely</td></tr> <tr><td>2</td><td>Yes, partially</td></tr> <tr><td>0</td><td>No, not at all</td></tr> </table>                                                                                                                                                                                                                                                                                                                                                                                                                                                                                 | 1 | Yes, completely           | 2                                                                                   | Yes, partially | 0                         | No, not at all                            |   |                           |                                                                        |    |                            |                                         |    |                           |                                 |    |                            |       |
| 1   | Yes, completely                                                                              |                                                                                                                                                                                                                               |                                                                                                                                                                                                                                                                                                                                                                                                                                                                                                                                                                                                                                                                     |   |                           |                                                                                     |                |                           |                                           |   |                           |                                                                        |    |                            |                                         |    |                           |                                 |    |                            |       |
| 2   | Yes, partially                                                                               |                                                                                                                                                                                                                               |                                                                                                                                                                                                                                                                                                                                                                                                                                                                                                                                                                                                                                                                     |   |                           |                                                                                     |                |                           |                                           |   |                           |                                                                        |    |                            |                                         |    |                           |                                 |    |                            |       |
| 0   | No, not at all                                                                               |                                                                                                                                                                                                                               |                                                                                                                                                                                                                                                                                                                                                                                                                                                                                                                                                                                                                                                                     |   |                           |                                                                                     |                |                           |                                           |   |                           |                                                                        |    |                            |                                         |    |                           |                                 |    |                            |       |
| 203 | cosm_probl_oth_th_act<br>Show the field ONLY if:<br>[cosm_probl_oth_th_yn] = '1'             | Which of the therapy methods are you still currently implementing?                                                                                                                                                            | checkbox, Required<br><table border="1"> <tr><td>1</td><td>cosm_probl_oth_th_act_1</td><td>lifestyle intervention (diet, exercise, etc.)</td></tr> <tr><td>2</td><td>cosm_probl_oth_th_act_2</td><td>medication (including contraceptive pill)</td></tr> <tr><td>3</td><td>cosm_probl_oth_th_act_3</td><td>psychotherapy</td></tr> <tr><td>4</td><td>cosm_probl_oth_th_act_4</td><td>bariatric surgery (e.g. gastric bypass)</td></tr> </table>                                                                                                                                                                                                                     | 1 | cosm_probl_oth_th_act_1   | lifestyle intervention (diet, exercise, etc.)                                       | 2              | cosm_probl_oth_th_act_2   | medication (including contraceptive pill) | 3 | cosm_probl_oth_th_act_3   | psychotherapy                                                          | 4  | cosm_probl_oth_th_act_4    | bariatric surgery (e.g. gastric bypass) |    |                           |                                 |    |                            |       |
| 1   | cosm_probl_oth_th_act_1                                                                      | lifestyle intervention (diet, exercise, etc.)                                                                                                                                                                                 |                                                                                                                                                                                                                                                                                                                                                                                                                                                                                                                                                                                                                                                                     |   |                           |                                                                                     |                |                           |                                           |   |                           |                                                                        |    |                            |                                         |    |                           |                                 |    |                            |       |
| 2   | cosm_probl_oth_th_act_2                                                                      | medication (including contraceptive pill)                                                                                                                                                                                     |                                                                                                                                                                                                                                                                                                                                                                                                                                                                                                                                                                                                                                                                     |   |                           |                                                                                     |                |                           |                                           |   |                           |                                                                        |    |                            |                                         |    |                           |                                 |    |                            |       |
| 3   | cosm_probl_oth_th_act_3                                                                      | psychotherapy                                                                                                                                                                                                                 |                                                                                                                                                                                                                                                                                                                                                                                                                                                                                                                                                                                                                                                                     |   |                           |                                                                                     |                |                           |                                           |   |                           |                                                                        |    |                            |                                         |    |                           |                                 |    |                            |       |
| 4   | cosm_probl_oth_th_act_4                                                                      | bariatric surgery (e.g. gastric bypass)                                                                                                                                                                                       |                                                                                                                                                                                                                                                                                                                                                                                                                                                                                                                                                                                                                                                                     |   |                           |                                                                                     |                |                           |                                           |   |                           |                                                                        |    |                            |                                         |    |                           |                                 |    |                            |       |

|     |                                                                                           |                                                                                                                                                 |                                                                                                                                                                                                                                                                                                                                                                                                                                                                                                                                                                                                                                                                                                                |    |                          |                                                                                     |    |                          |                |   |                          |                                                                        |    |                           |                            |   |                          |                                 |    |                           |                            |
|-----|-------------------------------------------------------------------------------------------|-------------------------------------------------------------------------------------------------------------------------------------------------|----------------------------------------------------------------------------------------------------------------------------------------------------------------------------------------------------------------------------------------------------------------------------------------------------------------------------------------------------------------------------------------------------------------------------------------------------------------------------------------------------------------------------------------------------------------------------------------------------------------------------------------------------------------------------------------------------------------|----|--------------------------|-------------------------------------------------------------------------------------|----|--------------------------|----------------|---|--------------------------|------------------------------------------------------------------------|----|---------------------------|----------------------------|---|--------------------------|---------------------------------|----|---------------------------|----------------------------|
|     |                                                                                           |                                                                                                                                                 | <table border="1"> <tr> <td>88</td> <td>cosm_probl_oth_th_act_88</td> <td>other</td> </tr> <tr> <td>0</td> <td>cosm_probl_oth_th_act_0</td> <td>none more</td> </tr> </table> <p>Field Annotation: @NONEOFTHEABOVE=0</p>                                                                                                                                                                                                                                                                                                                                                                                                                                                                                       | 88 | cosm_probl_oth_th_act_88 | other                                                                               | 0  | cosm_probl_oth_th_act_0  | none more      |   |                          |                                                                        |    |                           |                            |   |                          |                                 |    |                           |                            |
| 88  | cosm_probl_oth_th_act_88                                                                  | other                                                                                                                                           |                                                                                                                                                                                                                                                                                                                                                                                                                                                                                                                                                                                                                                                                                                                |    |                          |                                                                                     |    |                          |                |   |                          |                                                                        |    |                           |                            |   |                          |                                 |    |                           |                            |
| 0   | cosm_probl_oth_th_act_0                                                                   | none more                                                                                                                                       |                                                                                                                                                                                                                                                                                                                                                                                                                                                                                                                                                                                                                                                                                                                |    |                          |                                                                                     |    |                          |                |   |                          |                                                                        |    |                           |                            |   |                          |                                 |    |                           |                            |
| 204 | cosm_probl_oth_th1_act<br>Show the field ONLY if:<br>[cosm_probl_oth_th_act(1)] = '1'     | Please select the lifestyle interventions you are still currently performing:                                                                   | <p>checkbox, Required</p> <table border="1"> <tr> <td>1</td> <td>cosm_probl_oth_th1_act_1</td> <td>Behavioural interventions (e.g. goal-setting, self-monitoring, slower eating, etc.)</td> </tr> <tr> <td>2</td> <td>cosm_probl_oth_th1_act_2</td> <td>attitude</td> </tr> <tr> <td>3</td> <td>cosm_probl_oth_th1_act_3</td> <td>dietary interventions (e.g. well-balanced, reduce energy intake, etc.)</td> </tr> <tr> <td>4</td> <td>cosm_probl_oth_th1_act_4</td> <td>physical activity</td> </tr> <tr> <td>5</td> <td>cosm_probl_oth_th1_act_5</td> <td>weight assessment and reduction</td> </tr> <tr> <td>88</td> <td>cosm_probl_oth_th1_act_88</td> <td>other (as described above)</td> </tr> </table> | 1  | cosm_probl_oth_th1_act_1 | Behavioural interventions (e.g. goal-setting, self-monitoring, slower eating, etc.) | 2  | cosm_probl_oth_th1_act_2 | attitude       | 3 | cosm_probl_oth_th1_act_3 | dietary interventions (e.g. well-balanced, reduce energy intake, etc.) | 4  | cosm_probl_oth_th1_act_4  | physical activity          | 5 | cosm_probl_oth_th1_act_5 | weight assessment and reduction | 88 | cosm_probl_oth_th1_act_88 | other (as described above) |
| 1   | cosm_probl_oth_th1_act_1                                                                  | Behavioural interventions (e.g. goal-setting, self-monitoring, slower eating, etc.)                                                             |                                                                                                                                                                                                                                                                                                                                                                                                                                                                                                                                                                                                                                                                                                                |    |                          |                                                                                     |    |                          |                |   |                          |                                                                        |    |                           |                            |   |                          |                                 |    |                           |                            |
| 2   | cosm_probl_oth_th1_act_2                                                                  | attitude                                                                                                                                        |                                                                                                                                                                                                                                                                                                                                                                                                                                                                                                                                                                                                                                                                                                                |    |                          |                                                                                     |    |                          |                |   |                          |                                                                        |    |                           |                            |   |                          |                                 |    |                           |                            |
| 3   | cosm_probl_oth_th1_act_3                                                                  | dietary interventions (e.g. well-balanced, reduce energy intake, etc.)                                                                          |                                                                                                                                                                                                                                                                                                                                                                                                                                                                                                                                                                                                                                                                                                                |    |                          |                                                                                     |    |                          |                |   |                          |                                                                        |    |                           |                            |   |                          |                                 |    |                           |                            |
| 4   | cosm_probl_oth_th1_act_4                                                                  | physical activity                                                                                                                               |                                                                                                                                                                                                                                                                                                                                                                                                                                                                                                                                                                                                                                                                                                                |    |                          |                                                                                     |    |                          |                |   |                          |                                                                        |    |                           |                            |   |                          |                                 |    |                           |                            |
| 5   | cosm_probl_oth_th1_act_5                                                                  | weight assessment and reduction                                                                                                                 |                                                                                                                                                                                                                                                                                                                                                                                                                                                                                                                                                                                                                                                                                                                |    |                          |                                                                                     |    |                          |                |   |                          |                                                                        |    |                           |                            |   |                          |                                 |    |                           |                            |
| 88  | cosm_probl_oth_th1_act_88                                                                 | other (as described above)                                                                                                                      |                                                                                                                                                                                                                                                                                                                                                                                                                                                                                                                                                                                                                                                                                                                |    |                          |                                                                                     |    |                          |                |   |                          |                                                                        |    |                           |                            |   |                          |                                 |    |                           |                            |
| 205 | cosm_probl_oth_th2_act<br>Show the field ONLY if:<br>[cosm_probl_oth_th_act(2)] = '1'     | Please select the medication you are still currently taking:                                                                                    | <p>checkbox, Required</p> <table border="1"> <tr> <td>1</td> <td>cosm_probl_oth_th2_act_1</td> <td>contraceptive pill</td> </tr> <tr> <td>2</td> <td>cosm_probl_oth_th2_act_2</td> <td>anti-androgens</td> </tr> <tr> <td>3</td> <td>cosm_probl_oth_th2_act_3</td> <td>metformin</td> </tr> <tr> <td>88</td> <td>cosm_probl_oth_th2_act_88</td> <td>other (as described above)</td> </tr> </table>                                                                                                                                                                                                                                                                                                             | 1  | cosm_probl_oth_th2_act_1 | contraceptive pill                                                                  | 2  | cosm_probl_oth_th2_act_2 | anti-androgens | 3 | cosm_probl_oth_th2_act_3 | metformin                                                              | 88 | cosm_probl_oth_th2_act_88 | other (as described above) |   |                          |                                 |    |                           |                            |
| 1   | cosm_probl_oth_th2_act_1                                                                  | contraceptive pill                                                                                                                              |                                                                                                                                                                                                                                                                                                                                                                                                                                                                                                                                                                                                                                                                                                                |    |                          |                                                                                     |    |                          |                |   |                          |                                                                        |    |                           |                            |   |                          |                                 |    |                           |                            |
| 2   | cosm_probl_oth_th2_act_2                                                                  | anti-androgens                                                                                                                                  |                                                                                                                                                                                                                                                                                                                                                                                                                                                                                                                                                                                                                                                                                                                |    |                          |                                                                                     |    |                          |                |   |                          |                                                                        |    |                           |                            |   |                          |                                 |    |                           |                            |
| 3   | cosm_probl_oth_th2_act_3                                                                  | metformin                                                                                                                                       |                                                                                                                                                                                                                                                                                                                                                                                                                                                                                                                                                                                                                                                                                                                |    |                          |                                                                                     |    |                          |                |   |                          |                                                                        |    |                           |                            |   |                          |                                 |    |                           |                            |
| 88  | cosm_probl_oth_th2_act_88                                                                 | other (as described above)                                                                                                                      |                                                                                                                                                                                                                                                                                                                                                                                                                                                                                                                                                                                                                                                                                                                |    |                          |                                                                                     |    |                          |                |   |                          |                                                                        |    |                           |                            |   |                          |                                 |    |                           |                            |
| 206 | cosm_probl_oth_th_adv_yn<br>Show the field ONLY if:<br>[cosm_probl_oth_th_yn] = '1'       | Have you been consulted by your gynecologist regarding the therapy attempts?                                                                    | <p>radio, Required</p> <table border="1"> <tr> <td>1</td> <td>Yes</td> </tr> <tr> <td>0</td> <td>No</td> </tr> </table>                                                                                                                                                                                                                                                                                                                                                                                                                                                                                                                                                                                        | 1  | Yes                      | 0                                                                                   | No |                          |                |   |                          |                                                                        |    |                           |                            |   |                          |                                 |    |                           |                            |
| 1   | Yes                                                                                       |                                                                                                                                                 |                                                                                                                                                                                                                                                                                                                                                                                                                                                                                                                                                                                                                                                                                                                |    |                          |                                                                                     |    |                          |                |   |                          |                                                                        |    |                           |                            |   |                          |                                 |    |                           |                            |
| 0   | No                                                                                        |                                                                                                                                                 |                                                                                                                                                                                                                                                                                                                                                                                                                                                                                                                                                                                                                                                                                                                |    |                          |                                                                                     |    |                          |                |   |                          |                                                                        |    |                           |                            |   |                          |                                 |    |                           |                            |
| 207 | cosm_probl_oth_th_adv_sc<br>Show the field ONLY if:<br>[cosm_probl_oth_th_adv_yn] = '1'   | Please rate your satisfaction with consultation regarding therapy attempts.<br><i>Drag the blue slider and drop it at the desired position.</i> | <p>slider (number), Required<br/>Slider labels: 0, 50, 100<br/>Custom alignment: RH</p>                                                                                                                                                                                                                                                                                                                                                                                                                                                                                                                                                                                                                        |    |                          |                                                                                     |    |                          |                |   |                          |                                                                        |    |                           |                            |   |                          |                                 |    |                           |                            |
| 208 | cosm_probl_oth_th_adv_wish<br>Show the field ONLY if:<br>[cosm_probl_oth_th_adv_yn] = '0' | Would you have wished for a consultation by your gynecologist regarding therapy attempts?                                                       | <p>radio, Required</p> <table border="1"> <tr> <td>1</td> <td>Yes</td> </tr> <tr> <td>0</td> <td>No</td> </tr> </table>                                                                                                                                                                                                                                                                                                                                                                                                                                                                                                                                                                                        | 1  | Yes                      | 0                                                                                   | No |                          |                |   |                          |                                                                        |    |                           |                            |   |                          |                                 |    |                           |                            |
| 1   | Yes                                                                                       |                                                                                                                                                 |                                                                                                                                                                                                                                                                                                                                                                                                                                                                                                                                                                                                                                                                                                                |    |                          |                                                                                     |    |                          |                |   |                          |                                                                        |    |                           |                            |   |                          |                                 |    |                           |                            |
| 0   | No                                                                                        |                                                                                                                                                 |                                                                                                                                                                                                                                                                                                                                                                                                                                                                                                                                                                                                                                                                                                                |    |                          |                                                                                     |    |                          |                |   |                          |                                                                        |    |                           |                            |   |                          |                                 |    |                           |                            |

|     |                                                                              |                                                                                                                                                                                                                                              |                                                                                                                                                                                                                                                                                                                                                                                                                                                                                                                                                                                                                        |   |                    |                                   |            |                    |                                               |   |                    |                                     |   |                    |                                                   |   |                    |                      |    |                     |       |
|-----|------------------------------------------------------------------------------|----------------------------------------------------------------------------------------------------------------------------------------------------------------------------------------------------------------------------------------------|------------------------------------------------------------------------------------------------------------------------------------------------------------------------------------------------------------------------------------------------------------------------------------------------------------------------------------------------------------------------------------------------------------------------------------------------------------------------------------------------------------------------------------------------------------------------------------------------------------------------|---|--------------------|-----------------------------------|------------|--------------------|-----------------------------------------------|---|--------------------|-------------------------------------|---|--------------------|---------------------------------------------------|---|--------------------|----------------------|----|---------------------|-------|
| 209 | cosm_satisf_sc                                                               | Section Header: <i>overall satisfaction</i><br>Please rate your overall satisfaction with the medical care you receive from your gynecologist regarding cosmetic issues.<br><i>Drag the blue slider and drop it at the desired position.</i> | slider (number), Required<br>Slider labels: 0, 50, 100<br>Custom alignment: RH                                                                                                                                                                                                                                                                                                                                                                                                                                                                                                                                         |   |                    |                                   |            |                    |                                               |   |                    |                                     |   |                    |                                                   |   |                    |                      |    |                     |       |
| 210 | cosm_addit_yn                                                                | Would you like additional consultation?                                                                                                                                                                                                      | radio, Required<br><table border="1"> <tr> <td>1</td> <td>Yes</td> </tr> <tr> <td>0</td> <td>No</td> </tr> </table>                                                                                                                                                                                                                                                                                                                                                                                                                                                                                                    | 1 | Yes                | 0                                 | No         |                    |                                               |   |                    |                                     |   |                    |                                                   |   |                    |                      |    |                     |       |
| 1   | Yes                                                                          |                                                                                                                                                                                                                                              |                                                                                                                                                                                                                                                                                                                                                                                                                                                                                                                                                                                                                        |   |                    |                                   |            |                    |                                               |   |                    |                                     |   |                    |                                                   |   |                    |                      |    |                     |       |
| 0   | No                                                                           |                                                                                                                                                                                                                                              |                                                                                                                                                                                                                                                                                                                                                                                                                                                                                                                                                                                                                        |   |                    |                                   |            |                    |                                               |   |                    |                                     |   |                    |                                                   |   |                    |                      |    |                     |       |
| 211 | cosm_addit_spec<br>Show the field ONLY if:<br>[cosm_addit_yn] = '1'          | Please select what you would wish to have in addition:                                                                                                                                                                                       | checkbox, Required<br><table border="1"> <tr> <td>1</td> <td>cosm_addit_spec__1</td> <td>More consultation and reassurance</td> </tr> <tr> <td>2</td> <td>cosm_addit_spec__2</td> <td>More information providing (such as booklets)</td> </tr> <tr> <td>3</td> <td>cosm_addit_spec__3</td> <td>More possibilities to ask questions</td> </tr> <tr> <td>4</td> <td>cosm_addit_spec__4</td> <td>More examinations (blood tests, ultrasound, etc.)</td> </tr> <tr> <td>5</td> <td>cosm_addit_spec__5</td> <td>More therapy options</td> </tr> <tr> <td>88</td> <td>cosm_addit_spec__88</td> <td>Other</td> </tr> </table> | 1 | cosm_addit_spec__1 | More consultation and reassurance | 2          | cosm_addit_spec__2 | More information providing (such as booklets) | 3 | cosm_addit_spec__3 | More possibilities to ask questions | 4 | cosm_addit_spec__4 | More examinations (blood tests, ultrasound, etc.) | 5 | cosm_addit_spec__5 | More therapy options | 88 | cosm_addit_spec__88 | Other |
| 1   | cosm_addit_spec__1                                                           | More consultation and reassurance                                                                                                                                                                                                            |                                                                                                                                                                                                                                                                                                                                                                                                                                                                                                                                                                                                                        |   |                    |                                   |            |                    |                                               |   |                    |                                     |   |                    |                                                   |   |                    |                      |    |                     |       |
| 2   | cosm_addit_spec__2                                                           | More information providing (such as booklets)                                                                                                                                                                                                |                                                                                                                                                                                                                                                                                                                                                                                                                                                                                                                                                                                                                        |   |                    |                                   |            |                    |                                               |   |                    |                                     |   |                    |                                                   |   |                    |                      |    |                     |       |
| 3   | cosm_addit_spec__3                                                           | More possibilities to ask questions                                                                                                                                                                                                          |                                                                                                                                                                                                                                                                                                                                                                                                                                                                                                                                                                                                                        |   |                    |                                   |            |                    |                                               |   |                    |                                     |   |                    |                                                   |   |                    |                      |    |                     |       |
| 4   | cosm_addit_spec__4                                                           | More examinations (blood tests, ultrasound, etc.)                                                                                                                                                                                            |                                                                                                                                                                                                                                                                                                                                                                                                                                                                                                                                                                                                                        |   |                    |                                   |            |                    |                                               |   |                    |                                     |   |                    |                                                   |   |                    |                      |    |                     |       |
| 5   | cosm_addit_spec__5                                                           | More therapy options                                                                                                                                                                                                                         |                                                                                                                                                                                                                                                                                                                                                                                                                                                                                                                                                                                                                        |   |                    |                                   |            |                    |                                               |   |                    |                                     |   |                    |                                                   |   |                    |                      |    |                     |       |
| 88  | cosm_addit_spec__88                                                          | Other                                                                                                                                                                                                                                        |                                                                                                                                                                                                                                                                                                                                                                                                                                                                                                                                                                                                                        |   |                    |                                   |            |                    |                                               |   |                    |                                     |   |                    |                                                   |   |                    |                      |    |                     |       |
| 212 | cosm_addit_spec_88<br>Show the field ONLY if:<br>[cosm_addit_spec(88)] = '1' | What other additional consultation?<br><i>Please specify.</i>                                                                                                                                                                                | notes, Required                                                                                                                                                                                                                                                                                                                                                                                                                                                                                                                                                                                                        |   |                    |                                   |            |                    |                                               |   |                    |                                     |   |                    |                                                   |   |                    |                      |    |                     |       |
| 213 | einflussbereich_1_kosmetik_c<br>o mplete                                     | Section Header: <i>Form Status</i><br>Complete?                                                                                                                                                                                              | dropdown<br><table border="1"> <tr> <td>0</td> <td>Incomplete</td> </tr> <tr> <td>1</td> <td>Unverified</td> </tr> <tr> <td>2</td> <td>Complete</td> </tr> </table>                                                                                                                                                                                                                                                                                                                                                                                                                                                    | 0 | Incomplete         | 1                                 | Unverified | 2                  | Complete                                      |   |                    |                                     |   |                    |                                                   |   |                    |                      |    |                     |       |
| 0   | Incomplete                                                                   |                                                                                                                                                                                                                                              |                                                                                                                                                                                                                                                                                                                                                                                                                                                                                                                                                                                                                        |   |                    |                                   |            |                    |                                               |   |                    |                                     |   |                    |                                                   |   |                    |                      |    |                     |       |
| 1   | Unverified                                                                   |                                                                                                                                                                                                                                              |                                                                                                                                                                                                                                                                                                                                                                                                                                                                                                                                                                                                                        |   |                    |                                   |            |                    |                                               |   |                    |                                     |   |                    |                                                   |   |                    |                      |    |                     |       |
| 2   | Complete                                                                     |                                                                                                                                                                                                                                              |                                                                                                                                                                                                                                                                                                                                                                                                                                                                                                                                                                                                                        |   |                    |                                   |            |                    |                                               |   |                    |                                     |   |                    |                                                   |   |                    |                      |    |                     |       |



|     |                                                                                                                                  |                                                                                                                                                                                                                                         |                                                                                                                                                                                                                                                                                                                                                                                                                                                                                                                                                                                                                                                                                             |   |                        |                                                                                     |       |                        |                                                 |   |                        |                                                                        |   |                        |                                         |    |                         |                                 |    |                         |                            |
|-----|----------------------------------------------------------------------------------------------------------------------------------|-----------------------------------------------------------------------------------------------------------------------------------------------------------------------------------------------------------------------------------------|---------------------------------------------------------------------------------------------------------------------------------------------------------------------------------------------------------------------------------------------------------------------------------------------------------------------------------------------------------------------------------------------------------------------------------------------------------------------------------------------------------------------------------------------------------------------------------------------------------------------------------------------------------------------------------------------|---|------------------------|-------------------------------------------------------------------------------------|-------|------------------------|-------------------------------------------------|---|------------------------|------------------------------------------------------------------------|---|------------------------|-----------------------------------------|----|-------------------------|---------------------------------|----|-------------------------|----------------------------|
| 214 | stw_disease                                                                                                                      | Do you have any of the following conditions? Please select the applicable ones.                                                                                                                                                         | checkbox, Required <table border="1"> <tr> <td>1</td> <td>stw_disease__1</td> <td>Diabetes mellitus</td> </tr> <tr> <td>2</td> <td>stw_disease__2</td> <td>Gestational diabetes (currently or in the past)</td> </tr> <tr> <td>3</td> <td>stw_disease__3</td> <td>Prediabetes (elevated blood glucose but not yet diabetes)</td> </tr> <tr> <td>0</td> <td>stw_disease__0</td> <td>None of the above</td> </tr> </table> Field Annotation: @NONEOFTHEABOVE=0                                                                                                                                                                                                                                | 1 | stw_disease__1         | Diabetes mellitus                                                                   | 2     | stw_disease__2         | Gestational diabetes (currently or in the past) | 3 | stw_disease__3         | Prediabetes (elevated blood glucose but not yet diabetes)              | 0 | stw_disease__0         | None of the above                       |    |                         |                                 |    |                         |                            |
| 1   | stw_disease__1                                                                                                                   | Diabetes mellitus                                                                                                                                                                                                                       |                                                                                                                                                                                                                                                                                                                                                                                                                                                                                                                                                                                                                                                                                             |   |                        |                                                                                     |       |                        |                                                 |   |                        |                                                                        |   |                        |                                         |    |                         |                                 |    |                         |                            |
| 2   | stw_disease__2                                                                                                                   | Gestational diabetes (currently or in the past)                                                                                                                                                                                         |                                                                                                                                                                                                                                                                                                                                                                                                                                                                                                                                                                                                                                                                                             |   |                        |                                                                                     |       |                        |                                                 |   |                        |                                                                        |   |                        |                                         |    |                         |                                 |    |                         |                            |
| 3   | stw_disease__3                                                                                                                   | Prediabetes (elevated blood glucose but not yet diabetes)                                                                                                                                                                               |                                                                                                                                                                                                                                                                                                                                                                                                                                                                                                                                                                                                                                                                                             |   |                        |                                                                                     |       |                        |                                                 |   |                        |                                                                        |   |                        |                                         |    |                         |                                 |    |                         |                            |
| 0   | stw_disease__0                                                                                                                   | None of the above                                                                                                                                                                                                                       |                                                                                                                                                                                                                                                                                                                                                                                                                                                                                                                                                                                                                                                                                             |   |                        |                                                                                     |       |                        |                                                 |   |                        |                                                                        |   |                        |                                         |    |                         |                                 |    |                         |                            |
| 215 | stw_disease1_spec<br>Show the field ONLY if:<br>[stw_disease(1)] = '1'                                                           | What type of diabetes do you have?                                                                                                                                                                                                      | radio, Required <table border="1"> <tr> <td>1</td> <td>Typ 1</td> </tr> <tr> <td>2</td> <td>Typ 2</td> </tr> </table>                                                                                                                                                                                                                                                                                                                                                                                                                                                                                                                                                                       | 1 | Typ 1                  | 2                                                                                   | Typ 2 |                        |                                                 |   |                        |                                                                        |   |                        |                                         |    |                         |                                 |    |                         |                            |
| 1   | Typ 1                                                                                                                            |                                                                                                                                                                                                                                         |                                                                                                                                                                                                                                                                                                                                                                                                                                                                                                                                                                                                                                                                                             |   |                        |                                                                                     |       |                        |                                                 |   |                        |                                                                        |   |                        |                                         |    |                         |                                 |    |                         |                            |
| 2   | Typ 2                                                                                                                            |                                                                                                                                                                                                                                         |                                                                                                                                                                                                                                                                                                                                                                                                                                                                                                                                                                                                                                                                                             |   |                        |                                                                                     |       |                        |                                                 |   |                        |                                                                        |   |                        |                                         |    |                         |                                 |    |                         |                            |
| 216 | stw_disease2_spec_yn<br>Show the field ONLY if:<br>[stw_disease(2)] = '1'                                                        | Did this diabetes disappear after pregnancy?                                                                                                                                                                                            | radio, Required <table border="1"> <tr> <td>1</td> <td>Yes</td> </tr> <tr> <td>0</td> <td>No</td> </tr> </table>                                                                                                                                                                                                                                                                                                                                                                                                                                                                                                                                                                            | 1 | Yes                    | 0                                                                                   | No    |                        |                                                 |   |                        |                                                                        |   |                        |                                         |    |                         |                                 |    |                         |                            |
| 1   | Yes                                                                                                                              |                                                                                                                                                                                                                                         |                                                                                                                                                                                                                                                                                                                                                                                                                                                                                                                                                                                                                                                                                             |   |                        |                                                                                     |       |                        |                                                 |   |                        |                                                                        |   |                        |                                         |    |                         |                                 |    |                         |                            |
| 0   | No                                                                                                                               |                                                                                                                                                                                                                                         |                                                                                                                                                                                                                                                                                                                                                                                                                                                                                                                                                                                                                                                                                             |   |                        |                                                                                     |       |                        |                                                 |   |                        |                                                                        |   |                        |                                         |    |                         |                                 |    |                         |                            |
| 217 | stw_screen_bz_yn                                                                                                                 | Have you ever had a blood glucose test done?<br><i>This includes fasting blood glucose, long-term serum glucose (HbA1c) or oral glucose tolerance test (=oGTT, drink glucose solution followed by multiple measurements of glucose)</i> | radio, Required <table border="1"> <tr> <td>1</td> <td>Yes</td> </tr> <tr> <td>0</td> <td>No</td> </tr> <tr> <td>99</td> <td>Unknown</td> </tr> </table>                                                                                                                                                                                                                                                                                                                                                                                                                                                                                                                                    | 1 | Yes                    | 0                                                                                   | No    | 99                     | Unknown                                         |   |                        |                                                                        |   |                        |                                         |    |                         |                                 |    |                         |                            |
| 1   | Yes                                                                                                                              |                                                                                                                                                                                                                                         |                                                                                                                                                                                                                                                                                                                                                                                                                                                                                                                                                                                                                                                                                             |   |                        |                                                                                     |       |                        |                                                 |   |                        |                                                                        |   |                        |                                         |    |                         |                                 |    |                         |                            |
| 0   | No                                                                                                                               |                                                                                                                                                                                                                                         |                                                                                                                                                                                                                                                                                                                                                                                                                                                                                                                                                                                                                                                                                             |   |                        |                                                                                     |       |                        |                                                 |   |                        |                                                                        |   |                        |                                         |    |                         |                                 |    |                         |                            |
| 99  | Unknown                                                                                                                          |                                                                                                                                                                                                                                         |                                                                                                                                                                                                                                                                                                                                                                                                                                                                                                                                                                                                                                                                                             |   |                        |                                                                                     |       |                        |                                                 |   |                        |                                                                        |   |                        |                                         |    |                         |                                 |    |                         |                            |
| 218 | stw_disease_adv_yn<br>Show the field ONLY if:<br>[stw_disease(1)] = '1' or [stw_disease(2)] = '1' or [stw_disease(3)] = '1'      | Have you been consulted by your gynecologists about your diabetic disorder?                                                                                                                                                             | radio, Required <table border="1"> <tr> <td>1</td> <td>Yes</td> </tr> <tr> <td>0</td> <td>No</td> </tr> </table>                                                                                                                                                                                                                                                                                                                                                                                                                                                                                                                                                                            | 1 | Yes                    | 0                                                                                   | No    |                        |                                                 |   |                        |                                                                        |   |                        |                                         |    |                         |                                 |    |                         |                            |
| 1   | Yes                                                                                                                              |                                                                                                                                                                                                                                         |                                                                                                                                                                                                                                                                                                                                                                                                                                                                                                                                                                                                                                                                                             |   |                        |                                                                                     |       |                        |                                                 |   |                        |                                                                        |   |                        |                                         |    |                         |                                 |    |                         |                            |
| 0   | No                                                                                                                               |                                                                                                                                                                                                                                         |                                                                                                                                                                                                                                                                                                                                                                                                                                                                                                                                                                                                                                                                                             |   |                        |                                                                                     |       |                        |                                                 |   |                        |                                                                        |   |                        |                                         |    |                         |                                 |    |                         |                            |
| 219 | stw_disease_adv_sc<br>Show the field ONLY if:<br>[stw_disease_adv_yn] = '1'                                                      | Please rate your satisfaction with consultation regarding diabetic disorders?<br><i>Drag the blue slider and drop it at the desired position.</i>                                                                                       | slider (number), Required<br>Slider labels: 0, 50, 100<br>Custom alignment: RH                                                                                                                                                                                                                                                                                                                                                                                                                                                                                                                                                                                                              |   |                        |                                                                                     |       |                        |                                                 |   |                        |                                                                        |   |                        |                                         |    |                         |                                 |    |                         |                            |
| 220 | stw_disease_adv_hadb_yn<br>Show the field ONLY if:<br>[stw_disease(1)] = '1' or [stw_disease(2)] = '1' or [stw_disease(3)] = '1' | Have you been consulted by your primary care physician or diabetologist about your diabetic disorder?                                                                                                                                   | radio, Required <table border="1"> <tr> <td>1</td> <td>Yes</td> </tr> <tr> <td>0</td> <td>No</td> </tr> </table>                                                                                                                                                                                                                                                                                                                                                                                                                                                                                                                                                                            | 1 | Yes                    | 0                                                                                   | No    |                        |                                                 |   |                        |                                                                        |   |                        |                                         |    |                         |                                 |    |                         |                            |
| 1   | Yes                                                                                                                              |                                                                                                                                                                                                                                         |                                                                                                                                                                                                                                                                                                                                                                                                                                                                                                                                                                                                                                                                                             |   |                        |                                                                                     |       |                        |                                                 |   |                        |                                                                        |   |                        |                                         |    |                         |                                 |    |                         |                            |
| 0   | No                                                                                                                               |                                                                                                                                                                                                                                         |                                                                                                                                                                                                                                                                                                                                                                                                                                                                                                                                                                                                                                                                                             |   |                        |                                                                                     |       |                        |                                                 |   |                        |                                                                        |   |                        |                                         |    |                         |                                 |    |                         |                            |
| 221 | stw_disease_adv_wish<br>Show the field ONLY if:<br>[stw_disease_adv_yn] = '0'                                                    | Would you have wished for a consultation by your gynecologist regarding diabetic disorders?                                                                                                                                             | radio, Required <table border="1"> <tr> <td>1</td> <td>Yes</td> </tr> <tr> <td>0</td> <td>No</td> </tr> </table>                                                                                                                                                                                                                                                                                                                                                                                                                                                                                                                                                                            | 1 | Yes                    | 0                                                                                   | No    |                        |                                                 |   |                        |                                                                        |   |                        |                                         |    |                         |                                 |    |                         |                            |
| 1   | Yes                                                                                                                              |                                                                                                                                                                                                                                         |                                                                                                                                                                                                                                                                                                                                                                                                                                                                                                                                                                                                                                                                                             |   |                        |                                                                                     |       |                        |                                                 |   |                        |                                                                        |   |                        |                                         |    |                         |                                 |    |                         |                            |
| 0   | No                                                                                                                               |                                                                                                                                                                                                                                         |                                                                                                                                                                                                                                                                                                                                                                                                                                                                                                                                                                                                                                                                                             |   |                        |                                                                                     |       |                        |                                                 |   |                        |                                                                        |   |                        |                                         |    |                         |                                 |    |                         |                            |
| 222 | stw_diseases_th_yn<br>Show the field ONLY if:<br>[stw_disease(1)] = '1' or [stw_disease(2)] = '1' or [stw_disease(3)] = '1'      | Section Header: <i>therapy diabetic disorder</i><br>Have you tried any therapy for diabetic disorders?                                                                                                                                  | radio, Required <table border="1"> <tr> <td>1</td> <td>Yes</td> </tr> <tr> <td>0</td> <td>No</td> </tr> <tr> <td>99</td> <td>Unknown</td> </tr> </table>                                                                                                                                                                                                                                                                                                                                                                                                                                                                                                                                    | 1 | Yes                    | 0                                                                                   | No    | 99                     | Unknown                                         |   |                        |                                                                        |   |                        |                                         |    |                         |                                 |    |                         |                            |
| 1   | Yes                                                                                                                              |                                                                                                                                                                                                                                         |                                                                                                                                                                                                                                                                                                                                                                                                                                                                                                                                                                                                                                                                                             |   |                        |                                                                                     |       |                        |                                                 |   |                        |                                                                        |   |                        |                                         |    |                         |                                 |    |                         |                            |
| 0   | No                                                                                                                               |                                                                                                                                                                                                                                         |                                                                                                                                                                                                                                                                                                                                                                                                                                                                                                                                                                                                                                                                                             |   |                        |                                                                                     |       |                        |                                                 |   |                        |                                                                        |   |                        |                                         |    |                         |                                 |    |                         |                            |
| 99  | Unknown                                                                                                                          |                                                                                                                                                                                                                                         |                                                                                                                                                                                                                                                                                                                                                                                                                                                                                                                                                                                                                                                                                             |   |                        |                                                                                     |       |                        |                                                 |   |                        |                                                                        |   |                        |                                         |    |                         |                                 |    |                         |                            |
| 223 | stw_diseases_th_spec<br>Show the field ONLY if:<br>[stw_diseases_th_yn] = '1'                                                    | Which therapy method have you tried already?<br><i>If you are not sure about one of the options you can select it to have a look at the sub-categories. If there isn't anything suitable you can uncheck the option again.</i>          | checkbox, Required <table border="1"> <tr> <td>1</td> <td>stw_diseases_th_spec_1</td> <td>lifestyle intervention (diet, exercise, etc.)</td> </tr> <tr> <td>2</td> <td>stw_diseases_th_spec_2</td> <td>medication (including contraceptive pill)</td> </tr> <tr> <td>3</td> <td>stw_diseases_th_spec_3</td> <td>psychotherapy</td> </tr> <tr> <td>4</td> <td>stw_diseases_th_spec_4</td> <td>bariatric surgery (e.g. gastric bypass)</td> </tr> <tr> <td>88</td> <td>stw_diseases_th_spec_88</td> <td>other</td> </tr> </table>                                                                                                                                                             | 1 | stw_diseases_th_spec_1 | lifestyle intervention (diet, exercise, etc.)                                       | 2     | stw_diseases_th_spec_2 | medication (including contraceptive pill)       | 3 | stw_diseases_th_spec_3 | psychotherapy                                                          | 4 | stw_diseases_th_spec_4 | bariatric surgery (e.g. gastric bypass) | 88 | stw_diseases_th_spec_88 | other                           |    |                         |                            |
| 1   | stw_diseases_th_spec_1                                                                                                           | lifestyle intervention (diet, exercise, etc.)                                                                                                                                                                                           |                                                                                                                                                                                                                                                                                                                                                                                                                                                                                                                                                                                                                                                                                             |   |                        |                                                                                     |       |                        |                                                 |   |                        |                                                                        |   |                        |                                         |    |                         |                                 |    |                         |                            |
| 2   | stw_diseases_th_spec_2                                                                                                           | medication (including contraceptive pill)                                                                                                                                                                                               |                                                                                                                                                                                                                                                                                                                                                                                                                                                                                                                                                                                                                                                                                             |   |                        |                                                                                     |       |                        |                                                 |   |                        |                                                                        |   |                        |                                         |    |                         |                                 |    |                         |                            |
| 3   | stw_diseases_th_spec_3                                                                                                           | psychotherapy                                                                                                                                                                                                                           |                                                                                                                                                                                                                                                                                                                                                                                                                                                                                                                                                                                                                                                                                             |   |                        |                                                                                     |       |                        |                                                 |   |                        |                                                                        |   |                        |                                         |    |                         |                                 |    |                         |                            |
| 4   | stw_diseases_th_spec_4                                                                                                           | bariatric surgery (e.g. gastric bypass)                                                                                                                                                                                                 |                                                                                                                                                                                                                                                                                                                                                                                                                                                                                                                                                                                                                                                                                             |   |                        |                                                                                     |       |                        |                                                 |   |                        |                                                                        |   |                        |                                         |    |                         |                                 |    |                         |                            |
| 88  | stw_diseases_th_spec_88                                                                                                          | other                                                                                                                                                                                                                                   |                                                                                                                                                                                                                                                                                                                                                                                                                                                                                                                                                                                                                                                                                             |   |                        |                                                                                     |       |                        |                                                 |   |                        |                                                                        |   |                        |                                         |    |                         |                                 |    |                         |                            |
| 224 | stw_diseases_th_spec88<br>Show the field ONLY if:<br>[stw_diseases_th_spec(88)] = '1'                                            | What other therapeutic options?<br><i>Please specify.</i>                                                                                                                                                                               | notes, Required                                                                                                                                                                                                                                                                                                                                                                                                                                                                                                                                                                                                                                                                             |   |                        |                                                                                     |       |                        |                                                 |   |                        |                                                                        |   |                        |                                         |    |                         |                                 |    |                         |                            |
| 225 | stw_disease_th1_spec<br>Show the field ONLY if:<br>[stw_diseases_th_spec(1)] = '1'                                               | Which lifestyle interventions have you tried?                                                                                                                                                                                           | checkbox, Required <table border="1"> <tr> <td>1</td> <td>stw_disease_th1_spec_1</td> <td>Behavioural interventions (e.g. goal-setting, self-monitoring, slower eating, etc.)</td> </tr> <tr> <td>2</td> <td>stw_disease_th1_spec_2</td> <td>attitude</td> </tr> <tr> <td>3</td> <td>stw_disease_th1_spec_3</td> <td>dietary interventions (e.g. well-balanced, reduce energy intake, etc.)</td> </tr> <tr> <td>4</td> <td>stw_disease_th1_spec_4</td> <td>physical activity</td> </tr> <tr> <td>5</td> <td>stw_disease_th1_spec_5</td> <td>weight assessment and reduction</td> </tr> <tr> <td>88</td> <td>stw_disease_th1_spec_88</td> <td>other (as described above)</td> </tr> </table> | 1 | stw_disease_th1_spec_1 | Behavioural interventions (e.g. goal-setting, self-monitoring, slower eating, etc.) | 2     | stw_disease_th1_spec_2 | attitude                                        | 3 | stw_disease_th1_spec_3 | dietary interventions (e.g. well-balanced, reduce energy intake, etc.) | 4 | stw_disease_th1_spec_4 | physical activity                       | 5  | stw_disease_th1_spec_5  | weight assessment and reduction | 88 | stw_disease_th1_spec_88 | other (as described above) |
| 1   | stw_disease_th1_spec_1                                                                                                           | Behavioural interventions (e.g. goal-setting, self-monitoring, slower eating, etc.)                                                                                                                                                     |                                                                                                                                                                                                                                                                                                                                                                                                                                                                                                                                                                                                                                                                                             |   |                        |                                                                                     |       |                        |                                                 |   |                        |                                                                        |   |                        |                                         |    |                         |                                 |    |                         |                            |
| 2   | stw_disease_th1_spec_2                                                                                                           | attitude                                                                                                                                                                                                                                |                                                                                                                                                                                                                                                                                                                                                                                                                                                                                                                                                                                                                                                                                             |   |                        |                                                                                     |       |                        |                                                 |   |                        |                                                                        |   |                        |                                         |    |                         |                                 |    |                         |                            |
| 3   | stw_disease_th1_spec_3                                                                                                           | dietary interventions (e.g. well-balanced, reduce energy intake, etc.)                                                                                                                                                                  |                                                                                                                                                                                                                                                                                                                                                                                                                                                                                                                                                                                                                                                                                             |   |                        |                                                                                     |       |                        |                                                 |   |                        |                                                                        |   |                        |                                         |    |                         |                                 |    |                         |                            |
| 4   | stw_disease_th1_spec_4                                                                                                           | physical activity                                                                                                                                                                                                                       |                                                                                                                                                                                                                                                                                                                                                                                                                                                                                                                                                                                                                                                                                             |   |                        |                                                                                     |       |                        |                                                 |   |                        |                                                                        |   |                        |                                         |    |                         |                                 |    |                         |                            |
| 5   | stw_disease_th1_spec_5                                                                                                           | weight assessment and reduction                                                                                                                                                                                                         |                                                                                                                                                                                                                                                                                                                                                                                                                                                                                                                                                                                                                                                                                             |   |                        |                                                                                     |       |                        |                                                 |   |                        |                                                                        |   |                        |                                         |    |                         |                                 |    |                         |                            |
| 88  | stw_disease_th1_spec_88                                                                                                          | other (as described above)                                                                                                                                                                                                              |                                                                                                                                                                                                                                                                                                                                                                                                                                                                                                                                                                                                                                                                                             |   |                        |                                                                                     |       |                        |                                                 |   |                        |                                                                        |   |                        |                                         |    |                         |                                 |    |                         |                            |
| 226 | stw_disease_th1_spec88<br>Show the field ONLY if:<br>[stw_disease_th1_spec(88)] = '1'                                            | What other lifestyle intervention?<br><i>Please specify.</i>                                                                                                                                                                            | notes, Required                                                                                                                                                                                                                                                                                                                                                                                                                                                                                                                                                                                                                                                                             |   |                        |                                                                                     |       |                        |                                                 |   |                        |                                                                        |   |                        |                                         |    |                         |                                 |    |                         |                            |

|     |                                                                                                                        |                                                                                                                                                                                                                                                                                 |                                                                                                                                                                                                                                                                                                                                                                                                                                                                                                                                                                                                                                                                                          |   |                        |                                                                                     |                |                        |                                               |   |                        |                                                                        |    |                         |                                         |    |                        |                                 |    |                        |                            |
|-----|------------------------------------------------------------------------------------------------------------------------|---------------------------------------------------------------------------------------------------------------------------------------------------------------------------------------------------------------------------------------------------------------------------------|------------------------------------------------------------------------------------------------------------------------------------------------------------------------------------------------------------------------------------------------------------------------------------------------------------------------------------------------------------------------------------------------------------------------------------------------------------------------------------------------------------------------------------------------------------------------------------------------------------------------------------------------------------------------------------------|---|------------------------|-------------------------------------------------------------------------------------|----------------|------------------------|-----------------------------------------------|---|------------------------|------------------------------------------------------------------------|----|-------------------------|-----------------------------------------|----|------------------------|---------------------------------|----|------------------------|----------------------------|
| 227 | stw_disease_th2_spec<br>Show the field ONLY if:<br>[stw_diseases_th_spec(2)] = '1'                                     | Please select the applicable medications:                                                                                                                                                                                                                                       | checkbox, Required<br><table border="1"> <tr> <td>1</td> <td>stw_disease_th2_spec_1</td> <td>Metformin</td> </tr> <tr> <td>2</td> <td>stw_disease_th2_spec_2</td> <td>other oral antidiabetics (pills)</td> </tr> <tr> <td>3</td> <td>stw_disease_th2_spec_3</td> <td>Insulin (injection/pen)</td> </tr> <tr> <td>88</td> <td>stw_disease_th2_spec_88</td> <td>other</td> </tr> </table>                                                                                                                                                                                                                                                                                                 | 1 | stw_disease_th2_spec_1 | Metformin                                                                           | 2              | stw_disease_th2_spec_2 | other oral antidiabetics (pills)              | 3 | stw_disease_th2_spec_3 | Insulin (injection/pen)                                                | 88 | stw_disease_th2_spec_88 | other                                   |    |                        |                                 |    |                        |                            |
| 1   | stw_disease_th2_spec_1                                                                                                 | Metformin                                                                                                                                                                                                                                                                       |                                                                                                                                                                                                                                                                                                                                                                                                                                                                                                                                                                                                                                                                                          |   |                        |                                                                                     |                |                        |                                               |   |                        |                                                                        |    |                         |                                         |    |                        |                                 |    |                        |                            |
| 2   | stw_disease_th2_spec_2                                                                                                 | other oral antidiabetics (pills)                                                                                                                                                                                                                                                |                                                                                                                                                                                                                                                                                                                                                                                                                                                                                                                                                                                                                                                                                          |   |                        |                                                                                     |                |                        |                                               |   |                        |                                                                        |    |                         |                                         |    |                        |                                 |    |                        |                            |
| 3   | stw_disease_th2_spec_3                                                                                                 | Insulin (injection/pen)                                                                                                                                                                                                                                                         |                                                                                                                                                                                                                                                                                                                                                                                                                                                                                                                                                                                                                                                                                          |   |                        |                                                                                     |                |                        |                                               |   |                        |                                                                        |    |                         |                                         |    |                        |                                 |    |                        |                            |
| 88  | stw_disease_th2_spec_88                                                                                                | other                                                                                                                                                                                                                                                                           |                                                                                                                                                                                                                                                                                                                                                                                                                                                                                                                                                                                                                                                                                          |   |                        |                                                                                     |                |                        |                                               |   |                        |                                                                        |    |                         |                                         |    |                        |                                 |    |                        |                            |
| 228 | stw_disease_th2_spec_88<br>Show the field ONLY if:<br>[stw_disease_th2_spec(88)] = '1'                                 | What other medication?<br><i>Please specify.</i>                                                                                                                                                                                                                                | notes, Required                                                                                                                                                                                                                                                                                                                                                                                                                                                                                                                                                                                                                                                                          |   |                        |                                                                                     |                |                        |                                               |   |                        |                                                                        |    |                         |                                         |    |                        |                                 |    |                        |                            |
| 229 | stw_disease_th_effect<br>Show the field ONLY if:<br>[stw_diseases_th_yn] = '1'                                         | Were the therapy attempts effective?                                                                                                                                                                                                                                            | dropdown, Required<br><table border="1"> <tr> <td>1</td> <td>Yes, completely</td> </tr> <tr> <td>2</td> <td>Yes, partially</td> </tr> <tr> <td>0</td> <td>No, not at all</td> </tr> </table>                                                                                                                                                                                                                                                                                                                                                                                                                                                                                             | 1 | Yes, completely        | 2                                                                                   | Yes, partially | 0                      | No, not at all                                |   |                        |                                                                        |    |                         |                                         |    |                        |                                 |    |                        |                            |
| 1   | Yes, completely                                                                                                        |                                                                                                                                                                                                                                                                                 |                                                                                                                                                                                                                                                                                                                                                                                                                                                                                                                                                                                                                                                                                          |   |                        |                                                                                     |                |                        |                                               |   |                        |                                                                        |    |                         |                                         |    |                        |                                 |    |                        |                            |
| 2   | Yes, partially                                                                                                         |                                                                                                                                                                                                                                                                                 |                                                                                                                                                                                                                                                                                                                                                                                                                                                                                                                                                                                                                                                                                          |   |                        |                                                                                     |                |                        |                                               |   |                        |                                                                        |    |                         |                                         |    |                        |                                 |    |                        |                            |
| 0   | No, not at all                                                                                                         |                                                                                                                                                                                                                                                                                 |                                                                                                                                                                                                                                                                                                                                                                                                                                                                                                                                                                                                                                                                                          |   |                        |                                                                                     |                |                        |                                               |   |                        |                                                                        |    |                         |                                         |    |                        |                                 |    |                        |                            |
| 230 | stw_diseases_th_act<br>Show the field ONLY if:<br>[stw_diseases_th_yn] = '1'                                           | Which of the therapy methods are you still currently implementing?                                                                                                                                                                                                              | checkbox, Required<br><table border="1"> <tr> <td>1</td> <td>stw_diseases_th_act_1</td> <td>lifestyle intervention (diet, exercise, etc.)</td> </tr> <tr> <td>2</td> <td>stw_diseases_th_act_2</td> <td>medication (including contraceptive pill)</td> </tr> <tr> <td>3</td> <td>stw_diseases_th_act_3</td> <td>psychotherapy</td> </tr> <tr> <td>4</td> <td>stw_diseases_th_act_4</td> <td>bariatric surgery (e.g. gastric bypass)</td> </tr> <tr> <td>88</td> <td>stw_diseases_th_act_88</td> <td>other</td> </tr> <tr> <td>0</td> <td>stw_diseases_th_act_0</td> <td>Keine mehr</td> </tr> </table>                                                                                   | 1 | stw_diseases_th_act_1  | lifestyle intervention (diet, exercise, etc.)                                       | 2              | stw_diseases_th_act_2  | medication (including contraceptive pill)     | 3 | stw_diseases_th_act_3  | psychotherapy                                                          | 4  | stw_diseases_th_act_4   | bariatric surgery (e.g. gastric bypass) | 88 | stw_diseases_th_act_88 | other                           | 0  | stw_diseases_th_act_0  | Keine mehr                 |
| 1   | stw_diseases_th_act_1                                                                                                  | lifestyle intervention (diet, exercise, etc.)                                                                                                                                                                                                                                   |                                                                                                                                                                                                                                                                                                                                                                                                                                                                                                                                                                                                                                                                                          |   |                        |                                                                                     |                |                        |                                               |   |                        |                                                                        |    |                         |                                         |    |                        |                                 |    |                        |                            |
| 2   | stw_diseases_th_act_2                                                                                                  | medication (including contraceptive pill)                                                                                                                                                                                                                                       |                                                                                                                                                                                                                                                                                                                                                                                                                                                                                                                                                                                                                                                                                          |   |                        |                                                                                     |                |                        |                                               |   |                        |                                                                        |    |                         |                                         |    |                        |                                 |    |                        |                            |
| 3   | stw_diseases_th_act_3                                                                                                  | psychotherapy                                                                                                                                                                                                                                                                   |                                                                                                                                                                                                                                                                                                                                                                                                                                                                                                                                                                                                                                                                                          |   |                        |                                                                                     |                |                        |                                               |   |                        |                                                                        |    |                         |                                         |    |                        |                                 |    |                        |                            |
| 4   | stw_diseases_th_act_4                                                                                                  | bariatric surgery (e.g. gastric bypass)                                                                                                                                                                                                                                         |                                                                                                                                                                                                                                                                                                                                                                                                                                                                                                                                                                                                                                                                                          |   |                        |                                                                                     |                |                        |                                               |   |                        |                                                                        |    |                         |                                         |    |                        |                                 |    |                        |                            |
| 88  | stw_diseases_th_act_88                                                                                                 | other                                                                                                                                                                                                                                                                           |                                                                                                                                                                                                                                                                                                                                                                                                                                                                                                                                                                                                                                                                                          |   |                        |                                                                                     |                |                        |                                               |   |                        |                                                                        |    |                         |                                         |    |                        |                                 |    |                        |                            |
| 0   | stw_diseases_th_act_0                                                                                                  | Keine mehr                                                                                                                                                                                                                                                                      |                                                                                                                                                                                                                                                                                                                                                                                                                                                                                                                                                                                                                                                                                          |   |                        |                                                                                     |                |                        |                                               |   |                        |                                                                        |    |                         |                                         |    |                        |                                 |    |                        |                            |
| 231 | stw_disease_th1_act<br>Show the field ONLY if:<br>[stw_diseases_th_act(1)] = '1'                                       | Please select the lifestyle interventions you are still currently performing:                                                                                                                                                                                                   | checkbox, Required<br><table border="1"> <tr> <td>1</td> <td>stw_disease_th1_act_1</td> <td>Behavioural interventions (e.g. goal-setting, self-monitoring, slower eating, etc.)</td> </tr> <tr> <td>2</td> <td>stw_disease_th1_act_2</td> <td>attitude</td> </tr> <tr> <td>3</td> <td>stw_disease_th1_act_3</td> <td>dietary interventions (e.g. well-balanced, reduce energy intake, etc.)</td> </tr> <tr> <td>4</td> <td>stw_disease_th1_act_4</td> <td>physical activity</td> </tr> <tr> <td>5</td> <td>stw_disease_th1_act_5</td> <td>weight assessment and reduction</td> </tr> <tr> <td>88</td> <td>stw_disease_th1_act_88</td> <td>other (as described above)</td> </tr> </table> | 1 | stw_disease_th1_act_1  | Behavioural interventions (e.g. goal-setting, self-monitoring, slower eating, etc.) | 2              | stw_disease_th1_act_2  | attitude                                      | 3 | stw_disease_th1_act_3  | dietary interventions (e.g. well-balanced, reduce energy intake, etc.) | 4  | stw_disease_th1_act_4   | physical activity                       | 5  | stw_disease_th1_act_5  | weight assessment and reduction | 88 | stw_disease_th1_act_88 | other (as described above) |
| 1   | stw_disease_th1_act_1                                                                                                  | Behavioural interventions (e.g. goal-setting, self-monitoring, slower eating, etc.)                                                                                                                                                                                             |                                                                                                                                                                                                                                                                                                                                                                                                                                                                                                                                                                                                                                                                                          |   |                        |                                                                                     |                |                        |                                               |   |                        |                                                                        |    |                         |                                         |    |                        |                                 |    |                        |                            |
| 2   | stw_disease_th1_act_2                                                                                                  | attitude                                                                                                                                                                                                                                                                        |                                                                                                                                                                                                                                                                                                                                                                                                                                                                                                                                                                                                                                                                                          |   |                        |                                                                                     |                |                        |                                               |   |                        |                                                                        |    |                         |                                         |    |                        |                                 |    |                        |                            |
| 3   | stw_disease_th1_act_3                                                                                                  | dietary interventions (e.g. well-balanced, reduce energy intake, etc.)                                                                                                                                                                                                          |                                                                                                                                                                                                                                                                                                                                                                                                                                                                                                                                                                                                                                                                                          |   |                        |                                                                                     |                |                        |                                               |   |                        |                                                                        |    |                         |                                         |    |                        |                                 |    |                        |                            |
| 4   | stw_disease_th1_act_4                                                                                                  | physical activity                                                                                                                                                                                                                                                               |                                                                                                                                                                                                                                                                                                                                                                                                                                                                                                                                                                                                                                                                                          |   |                        |                                                                                     |                |                        |                                               |   |                        |                                                                        |    |                         |                                         |    |                        |                                 |    |                        |                            |
| 5   | stw_disease_th1_act_5                                                                                                  | weight assessment and reduction                                                                                                                                                                                                                                                 |                                                                                                                                                                                                                                                                                                                                                                                                                                                                                                                                                                                                                                                                                          |   |                        |                                                                                     |                |                        |                                               |   |                        |                                                                        |    |                         |                                         |    |                        |                                 |    |                        |                            |
| 88  | stw_disease_th1_act_88                                                                                                 | other (as described above)                                                                                                                                                                                                                                                      |                                                                                                                                                                                                                                                                                                                                                                                                                                                                                                                                                                                                                                                                                          |   |                        |                                                                                     |                |                        |                                               |   |                        |                                                                        |    |                         |                                         |    |                        |                                 |    |                        |                            |
| 232 | stw_disease_th2_act<br>Show the field ONLY if:<br>[stw_diseases_th_act(2)] = '1'                                       | Please select the medication you are still currently taking:                                                                                                                                                                                                                    | checkbox, Required<br><table border="1"> <tr> <td>1</td> <td>stw_disease_th2_act_1</td> <td>Metformin</td> </tr> <tr> <td>2</td> <td>stw_disease_th2_act_2</td> <td>other oral antidiabetics (pills)</td> </tr> <tr> <td>3</td> <td>stw_disease_th2_act_3</td> <td>Insulin (injection/pen)</td> </tr> <tr> <td>88</td> <td>stw_disease_th2_act_88</td> <td>other</td> </tr> </table>                                                                                                                                                                                                                                                                                                     | 1 | stw_disease_th2_act_1  | Metformin                                                                           | 2              | stw_disease_th2_act_2  | other oral antidiabetics (pills)              | 3 | stw_disease_th2_act_3  | Insulin (injection/pen)                                                | 88 | stw_disease_th2_act_88  | other                                   |    |                        |                                 |    |                        |                            |
| 1   | stw_disease_th2_act_1                                                                                                  | Metformin                                                                                                                                                                                                                                                                       |                                                                                                                                                                                                                                                                                                                                                                                                                                                                                                                                                                                                                                                                                          |   |                        |                                                                                     |                |                        |                                               |   |                        |                                                                        |    |                         |                                         |    |                        |                                 |    |                        |                            |
| 2   | stw_disease_th2_act_2                                                                                                  | other oral antidiabetics (pills)                                                                                                                                                                                                                                                |                                                                                                                                                                                                                                                                                                                                                                                                                                                                                                                                                                                                                                                                                          |   |                        |                                                                                     |                |                        |                                               |   |                        |                                                                        |    |                         |                                         |    |                        |                                 |    |                        |                            |
| 3   | stw_disease_th2_act_3                                                                                                  | Insulin (injection/pen)                                                                                                                                                                                                                                                         |                                                                                                                                                                                                                                                                                                                                                                                                                                                                                                                                                                                                                                                                                          |   |                        |                                                                                     |                |                        |                                               |   |                        |                                                                        |    |                         |                                         |    |                        |                                 |    |                        |                            |
| 88  | stw_disease_th2_act_88                                                                                                 | other                                                                                                                                                                                                                                                                           |                                                                                                                                                                                                                                                                                                                                                                                                                                                                                                                                                                                                                                                                                          |   |                        |                                                                                     |                |                        |                                               |   |                        |                                                                        |    |                         |                                         |    |                        |                                 |    |                        |                            |
| 233 | stw_disease_th_adv_yn<br>Show the field ONLY if:<br>[stw_diseases_th_yn] = '1'                                         | Have you been consulted by your gynecologist regarding the therapy attempts?                                                                                                                                                                                                    | radio, Required<br><table border="1"> <tr> <td>1</td> <td>Yes</td> </tr> <tr> <td>0</td> <td>No</td> </tr> </table>                                                                                                                                                                                                                                                                                                                                                                                                                                                                                                                                                                      | 1 | Yes                    | 0                                                                                   | No             |                        |                                               |   |                        |                                                                        |    |                         |                                         |    |                        |                                 |    |                        |                            |
| 1   | Yes                                                                                                                    |                                                                                                                                                                                                                                                                                 |                                                                                                                                                                                                                                                                                                                                                                                                                                                                                                                                                                                                                                                                                          |   |                        |                                                                                     |                |                        |                                               |   |                        |                                                                        |    |                         |                                         |    |                        |                                 |    |                        |                            |
| 0   | No                                                                                                                     |                                                                                                                                                                                                                                                                                 |                                                                                                                                                                                                                                                                                                                                                                                                                                                                                                                                                                                                                                                                                          |   |                        |                                                                                     |                |                        |                                               |   |                        |                                                                        |    |                         |                                         |    |                        |                                 |    |                        |                            |
| 234 | stw_disease_th_adv_sc<br>Show the field ONLY if:<br>[stw_disease_th_adv_yn] = '1'                                      | Please rate your satisfaction with consultation regarding therapy attempts.<br><i>Drag the blue slider and drop it at the desired position.</i>                                                                                                                                 | slider (number), Required<br>Slider labels: 0, 50, 100<br>Custom alignment: RH                                                                                                                                                                                                                                                                                                                                                                                                                                                                                                                                                                                                           |   |                        |                                                                                     |                |                        |                                               |   |                        |                                                                        |    |                         |                                         |    |                        |                                 |    |                        |                            |
| 235 | stw_disease_th_adv_wish<br>Show the field ONLY if:<br>[stw_disease_th_adv_yn] = '0'                                    | Would you have wished for a consultation by your gynecologist regarding therapy attempts?                                                                                                                                                                                       | radio, Required<br><table border="1"> <tr> <td>1</td> <td>Yes</td> </tr> <tr> <td>0</td> <td>No</td> </tr> </table>                                                                                                                                                                                                                                                                                                                                                                                                                                                                                                                                                                      | 1 | Yes                    | 0                                                                                   | No             |                        |                                               |   |                        |                                                                        |    |                         |                                         |    |                        |                                 |    |                        |                            |
| 1   | Yes                                                                                                                    |                                                                                                                                                                                                                                                                                 |                                                                                                                                                                                                                                                                                                                                                                                                                                                                                                                                                                                                                                                                                          |   |                        |                                                                                     |                |                        |                                               |   |                        |                                                                        |    |                         |                                         |    |                        |                                 |    |                        |                            |
| 0   | No                                                                                                                     |                                                                                                                                                                                                                                                                                 |                                                                                                                                                                                                                                                                                                                                                                                                                                                                                                                                                                                                                                                                                          |   |                        |                                                                                     |                |                        |                                               |   |                        |                                                                        |    |                         |                                         |    |                        |                                 |    |                        |                            |
| 236 | stw_satisf_sc<br>Show the field ONLY if:<br>[stw_disease(1)] = '1' or [stw_disease(2)] = '1' or [stw_disease(3)] = '1' | Section Header: <i>overall satisfaction metabolism / diabetic disorders</i><br>Please rate your overall satisfaction with the medical care you receive from your gynecologist regarding diabetic disorders?<br><i>Drag the blue slider and drop it at the desired position.</i> | slider (number), Required<br>Slider labels: 0, 50, 100<br>Custom alignment: RH                                                                                                                                                                                                                                                                                                                                                                                                                                                                                                                                                                                                           |   |                        |                                                                                     |                |                        |                                               |   |                        |                                                                        |    |                         |                                         |    |                        |                                 |    |                        |                            |
| 237 | stw_addit_yn<br>Show the field ONLY if:<br>[stw_disease(1)] = '1' or [stw_disease(2)] = '1' or [stw_disease(3)] = '1'  | Would you like additional consultation?                                                                                                                                                                                                                                         | radio, Required<br><table border="1"> <tr> <td>1</td> <td>Yes</td> </tr> <tr> <td>0</td> <td>No</td> </tr> </table>                                                                                                                                                                                                                                                                                                                                                                                                                                                                                                                                                                      | 1 | Yes                    | 0                                                                                   | No             |                        |                                               |   |                        |                                                                        |    |                         |                                         |    |                        |                                 |    |                        |                            |
| 1   | Yes                                                                                                                    |                                                                                                                                                                                                                                                                                 |                                                                                                                                                                                                                                                                                                                                                                                                                                                                                                                                                                                                                                                                                          |   |                        |                                                                                     |                |                        |                                               |   |                        |                                                                        |    |                         |                                         |    |                        |                                 |    |                        |                            |
| 0   | No                                                                                                                     |                                                                                                                                                                                                                                                                                 |                                                                                                                                                                                                                                                                                                                                                                                                                                                                                                                                                                                                                                                                                          |   |                        |                                                                                     |                |                        |                                               |   |                        |                                                                        |    |                         |                                         |    |                        |                                 |    |                        |                            |
| 238 | stw_addit_spec<br>Show the field ONLY if:<br>[stw_addit_yn] = '1'                                                      | Please select what you would wish to have in addition:                                                                                                                                                                                                                          | checkbox, Required<br><table border="1"> <tr> <td>1</td> <td>stw_addit_spec__1</td> <td>More consultation and reassurance</td> </tr> <tr> <td>2</td> <td>stw_addit_spec__2</td> <td>More information providing (such as booklets)</td> </tr> </table>                                                                                                                                                                                                                                                                                                                                                                                                                                    | 1 | stw_addit_spec__1      | More consultation and reassurance                                                   | 2              | stw_addit_spec__2      | More information providing (such as booklets) |   |                        |                                                                        |    |                         |                                         |    |                        |                                 |    |                        |                            |
| 1   | stw_addit_spec__1                                                                                                      | More consultation and reassurance                                                                                                                                                                                                                                               |                                                                                                                                                                                                                                                                                                                                                                                                                                                                                                                                                                                                                                                                                          |   |                        |                                                                                     |                |                        |                                               |   |                        |                                                                        |    |                         |                                         |    |                        |                                 |    |                        |                            |
| 2   | stw_addit_spec__2                                                                                                      | More information providing (such as booklets)                                                                                                                                                                                                                                   |                                                                                                                                                                                                                                                                                                                                                                                                                                                                                                                                                                                                                                                                                          |   |                        |                                                                                     |                |                        |                                               |   |                        |                                                                        |    |                         |                                         |    |                        |                                 |    |                        |                            |

|     |                                                                            |                                                               |                                                                                                                                                                                                                                                                                                                                                                                        |   |                   |                                     |            |                   |                                                   |   |                   |                      |    |                    |       |
|-----|----------------------------------------------------------------------------|---------------------------------------------------------------|----------------------------------------------------------------------------------------------------------------------------------------------------------------------------------------------------------------------------------------------------------------------------------------------------------------------------------------------------------------------------------------|---|-------------------|-------------------------------------|------------|-------------------|---------------------------------------------------|---|-------------------|----------------------|----|--------------------|-------|
|     |                                                                            |                                                               | <table border="1"> <tr> <td>3</td> <td>stw_addit_spec__3</td> <td>More possibilities to ask questions</td> </tr> <tr> <td>4</td> <td>stw_addit_spec__4</td> <td>More examinations (blood tests, ultrasound, etc.)</td> </tr> <tr> <td>5</td> <td>stw_addit_spec__5</td> <td>More therapy options</td> </tr> <tr> <td>88</td> <td>stw_addit_spec__88</td> <td>Other</td> </tr> </table> | 3 | stw_addit_spec__3 | More possibilities to ask questions | 4          | stw_addit_spec__4 | More examinations (blood tests, ultrasound, etc.) | 5 | stw_addit_spec__5 | More therapy options | 88 | stw_addit_spec__88 | Other |
| 3   | stw_addit_spec__3                                                          | More possibilities to ask questions                           |                                                                                                                                                                                                                                                                                                                                                                                        |   |                   |                                     |            |                   |                                                   |   |                   |                      |    |                    |       |
| 4   | stw_addit_spec__4                                                          | More examinations (blood tests, ultrasound, etc.)             |                                                                                                                                                                                                                                                                                                                                                                                        |   |                   |                                     |            |                   |                                                   |   |                   |                      |    |                    |       |
| 5   | stw_addit_spec__5                                                          | More therapy options                                          |                                                                                                                                                                                                                                                                                                                                                                                        |   |                   |                                     |            |                   |                                                   |   |                   |                      |    |                    |       |
| 88  | stw_addit_spec__88                                                         | Other                                                         |                                                                                                                                                                                                                                                                                                                                                                                        |   |                   |                                     |            |                   |                                                   |   |                   |                      |    |                    |       |
| 239 | stw_addit_spec_88<br>Show the field ONLY if:<br>[stw_addit_spec(88)] = '1' | What other additional consultation?<br><i>Please specify.</i> | notes, Required                                                                                                                                                                                                                                                                                                                                                                        |   |                   |                                     |            |                   |                                                   |   |                   |                      |    |                    |       |
| 240 | einflussbereich_2_stoffwechsel_complete                                    | Section Header: <i>Form Status</i><br>Complete?               | dropdown <table border="1"> <tr> <td>0</td> <td>Incomplete</td> </tr> <tr> <td>1</td> <td>Unverified</td> </tr> <tr> <td>2</td> <td>Complete</td> </tr> </table>                                                                                                                                                                                                                       | 0 | Incomplete        | 1                                   | Unverified | 2                 | Complete                                          |   |                   |                      |    |                    |       |
| 0   | Incomplete                                                                 |                                                               |                                                                                                                                                                                                                                                                                                                                                                                        |   |                   |                                     |            |                   |                                                   |   |                   |                      |    |                    |       |
| 1   | Unverified                                                                 |                                                               |                                                                                                                                                                                                                                                                                                                                                                                        |   |                   |                                     |            |                   |                                                   |   |                   |                      |    |                    |       |
| 2   | Complete                                                                   |                                                               |                                                                                                                                                                                                                                                                                                                                                                                        |   |                   |                                     |            |                   |                                                   |   |                   |                      |    |                    |       |

|     |                                                                                                                       |                                                                                                                                                                                                                                                                                                                    |                                                                                                                                                                                                                                                                                                                                                                                                                               |   |                            |      |                |                            |                |   |                            |                    |   |                            |               |    |                             |       |
|-----|-----------------------------------------------------------------------------------------------------------------------|--------------------------------------------------------------------------------------------------------------------------------------------------------------------------------------------------------------------------------------------------------------------------------------------------------------------|-------------------------------------------------------------------------------------------------------------------------------------------------------------------------------------------------------------------------------------------------------------------------------------------------------------------------------------------------------------------------------------------------------------------------------|---|----------------------------|------|----------------|----------------------------|----------------|---|----------------------------|--------------------|---|----------------------------|---------------|----|-----------------------------|-------|
| 241 | endo_current_bother_yn<br>Show the field ONLY if:<br>[mens_current_regular_yn] = '0'                                  | Section Header: <i>currently irregular menstruation</i><br>Earlier in this survey you stated to currently have an irregular menstrual cycle. Do these irregularities bother you?                                                                                                                                   | radio, Required<br><table border="1"><tr><td>1</td><td>Yes</td></tr><tr><td>0</td><td>No</td></tr></table>                                                                                                                                                                                                                                                                                                                    | 1 | Yes                        | 0    | No             |                            |                |   |                            |                    |   |                            |               |    |                             |       |
| 1   | Yes                                                                                                                   |                                                                                                                                                                                                                                                                                                                    |                                                                                                                                                                                                                                                                                                                                                                                                                               |   |                            |      |                |                            |                |   |                            |                    |   |                            |               |    |                             |       |
| 0   | No                                                                                                                    |                                                                                                                                                                                                                                                                                                                    |                                                                                                                                                                                                                                                                                                                                                                                                                               |   |                            |      |                |                            |                |   |                            |                    |   |                            |               |    |                             |       |
| 242 | endo_current_adv_yn<br>Show the field ONLY if:<br>[mens_current_regular_yn] = '0'                                     | Have you been consulted by your gynecologists about your currently irregular menstruation?                                                                                                                                                                                                                         | radio, Required<br><table border="1"><tr><td>1</td><td>Yes</td></tr><tr><td>0</td><td>No</td></tr></table>                                                                                                                                                                                                                                                                                                                    | 1 | Yes                        | 0    | No             |                            |                |   |                            |                    |   |                            |               |    |                             |       |
| 1   | Yes                                                                                                                   |                                                                                                                                                                                                                                                                                                                    |                                                                                                                                                                                                                                                                                                                                                                                                                               |   |                            |      |                |                            |                |   |                            |                    |   |                            |               |    |                             |       |
| 0   | No                                                                                                                    |                                                                                                                                                                                                                                                                                                                    |                                                                                                                                                                                                                                                                                                                                                                                                                               |   |                            |      |                |                            |                |   |                            |                    |   |                            |               |    |                             |       |
| 243 | endo_current_adv_sc<br>Show the field ONLY if:<br>[endo_current_adv_yn] = '1'                                         | Please rate your satisfaction with consultation regarding your currently irregular menstruation?<br><i>Drag the blue slider and drop it at the desired position.</i>                                                                                                                                               | slider (number), Required<br>Slider labels: 0, 50, 100<br>Custom alignment: RH                                                                                                                                                                                                                                                                                                                                                |   |                            |      |                |                            |                |   |                            |                    |   |                            |               |    |                             |       |
| 244 | endo_current_adv_wish<br>Show the field ONLY if:<br>[endo_current_adv_yn] = '0'                                       | Would you have wished for a consultation by your gynecologist regarding your currently irregular menstruation?                                                                                                                                                                                                     | radio, Required<br><table border="1"><tr><td>1</td><td>Yes</td></tr><tr><td>0</td><td>No</td></tr></table>                                                                                                                                                                                                                                                                                                                    | 1 | Yes                        | 0    | No             |                            |                |   |                            |                    |   |                            |               |    |                             |       |
| 1   | Yes                                                                                                                   |                                                                                                                                                                                                                                                                                                                    |                                                                                                                                                                                                                                                                                                                                                                                                                               |   |                            |      |                |                            |                |   |                            |                    |   |                            |               |    |                             |       |
| 0   | No                                                                                                                    |                                                                                                                                                                                                                                                                                                                    |                                                                                                                                                                                                                                                                                                                                                                                                                               |   |                            |      |                |                            |                |   |                            |                    |   |                            |               |    |                             |       |
| 245 | endo_past_bother_yn<br>Show the field ONLY if:<br>[mens_past_regular_yn] = '0'                                        | Section Header: <i>past - irregular menstrual cycle profile</i><br>Earlier in this survey you stated to have had an irregular menstrual cycle in the past. Did these irregularities bother you?                                                                                                                    | radio, Required<br><table border="1"><tr><td>1</td><td>Yes</td></tr><tr><td>0</td><td>No</td></tr></table>                                                                                                                                                                                                                                                                                                                    | 1 | Yes                        | 0    | No             |                            |                |   |                            |                    |   |                            |               |    |                             |       |
| 1   | Yes                                                                                                                   |                                                                                                                                                                                                                                                                                                                    |                                                                                                                                                                                                                                                                                                                                                                                                                               |   |                            |      |                |                            |                |   |                            |                    |   |                            |               |    |                             |       |
| 0   | No                                                                                                                    |                                                                                                                                                                                                                                                                                                                    |                                                                                                                                                                                                                                                                                                                                                                                                                               |   |                            |      |                |                            |                |   |                            |                    |   |                            |               |    |                             |       |
| 246 | endo_past_adv_yn<br>Show the field ONLY if:<br>[mens_past_regular_yn] = '0'                                           | Have you been consulted by your gynecologists about your irregular menstruation at that time?                                                                                                                                                                                                                      | radio, Required<br><table border="1"><tr><td>1</td><td>Yes</td></tr><tr><td>0</td><td>No</td></tr></table>                                                                                                                                                                                                                                                                                                                    | 1 | Yes                        | 0    | No             |                            |                |   |                            |                    |   |                            |               |    |                             |       |
| 1   | Yes                                                                                                                   |                                                                                                                                                                                                                                                                                                                    |                                                                                                                                                                                                                                                                                                                                                                                                                               |   |                            |      |                |                            |                |   |                            |                    |   |                            |               |    |                             |       |
| 0   | No                                                                                                                    |                                                                                                                                                                                                                                                                                                                    |                                                                                                                                                                                                                                                                                                                                                                                                                               |   |                            |      |                |                            |                |   |                            |                    |   |                            |               |    |                             |       |
| 247 | endo_past_adv_sc<br>Show the field ONLY if:<br>[endo_past_adv_yn] = '1'                                               | Please rate your satisfaction with consultation regarding your irregular menstruation at that time?<br><i>Drag the blue slider and drop it at the desired position.</i>                                                                                                                                            | slider (number), Required<br>Slider labels: 0, 50, 100<br>Custom alignment: RH                                                                                                                                                                                                                                                                                                                                                |   |                            |      |                |                            |                |   |                            |                    |   |                            |               |    |                             |       |
| 248 | endo_past_adv_wish<br>Show the field ONLY if:<br>[endo_past_adv_yn] = '0'                                             | Would you have wished for a consultation by your gynecologist regarding irregular menstruation at that time?                                                                                                                                                                                                       | radio, Required<br><table border="1"><tr><td>1</td><td>Yes</td></tr><tr><td>0</td><td>No</td></tr></table>                                                                                                                                                                                                                                                                                                                    | 1 | Yes                        | 0    | No             |                            |                |   |                            |                    |   |                            |               |    |                             |       |
| 1   | Yes                                                                                                                   |                                                                                                                                                                                                                                                                                                                    |                                                                                                                                                                                                                                                                                                                                                                                                                               |   |                            |      |                |                            |                |   |                            |                    |   |                            |               |    |                             |       |
| 0   | No                                                                                                                    |                                                                                                                                                                                                                                                                                                                    |                                                                                                                                                                                                                                                                                                                                                                                                                               |   |                            |      |                |                            |                |   |                            |                    |   |                            |               |    |                             |       |
| 249 | endo_pill_adv_yn<br>Show the field ONLY if:<br>[mens_current_regular_yn] = '0' or<br>[mens_past_regular_yn] = '0'     | Section Header: <i>contraceptive pill</i><br>Did your gynecologist consult you about the option of using a contraceptive pill to treat irregular menstruations?<br><i>This is only about whether the contraceptive pill was ever discussed. This is independent of whether it was desired or taken afterwards.</i> | radio, Required<br><table border="1"><tr><td>1</td><td>Yes</td></tr><tr><td>0</td><td>No</td></tr></table>                                                                                                                                                                                                                                                                                                                    | 1 | Yes                        | 0    | No             |                            |                |   |                            |                    |   |                            |               |    |                             |       |
| 1   | Yes                                                                                                                   |                                                                                                                                                                                                                                                                                                                    |                                                                                                                                                                                                                                                                                                                                                                                                                               |   |                            |      |                |                            |                |   |                            |                    |   |                            |               |    |                             |       |
| 0   | No                                                                                                                    |                                                                                                                                                                                                                                                                                                                    |                                                                                                                                                                                                                                                                                                                                                                                                                               |   |                            |      |                |                            |                |   |                            |                    |   |                            |               |    |                             |       |
| 250 | endo_pill_adv_take_yn<br>Show the field ONLY if:<br>[endo_pill_adv_yn] = '1'                                          | Following that, have you taken the contraceptive pill?                                                                                                                                                                                                                                                             | radio, Required<br><table border="1"><tr><td>1</td><td>Yes</td></tr><tr><td>0</td><td>No</td></tr></table>                                                                                                                                                                                                                                                                                                                    | 1 | Yes                        | 0    | No             |                            |                |   |                            |                    |   |                            |               |    |                             |       |
| 1   | Yes                                                                                                                   |                                                                                                                                                                                                                                                                                                                    |                                                                                                                                                                                                                                                                                                                                                                                                                               |   |                            |      |                |                            |                |   |                            |                    |   |                            |               |    |                             |       |
| 0   | No                                                                                                                    |                                                                                                                                                                                                                                                                                                                    |                                                                                                                                                                                                                                                                                                                                                                                                                               |   |                            |      |                |                            |                |   |                            |                    |   |                            |               |    |                             |       |
| 251 | endo_pill_nadv_take_yn<br>Show the field ONLY if:<br>[endo_pill_adv_yn] = '0' or [endo_pill_adv_yn] = '1'             | Have you taken the contraceptive pill (also) because of other reasons than irregular menstruations?                                                                                                                                                                                                                | radio, Required<br><table border="1"><tr><td>1</td><td>Yes</td></tr><tr><td>0</td><td>No</td></tr></table>                                                                                                                                                                                                                                                                                                                    | 1 | Yes                        | 0    | No             |                            |                |   |                            |                    |   |                            |               |    |                             |       |
| 1   | Yes                                                                                                                   |                                                                                                                                                                                                                                                                                                                    |                                                                                                                                                                                                                                                                                                                                                                                                                               |   |                            |      |                |                            |                |   |                            |                    |   |                            |               |    |                             |       |
| 0   | No                                                                                                                    |                                                                                                                                                                                                                                                                                                                    |                                                                                                                                                                                                                                                                                                                                                                                                                               |   |                            |      |                |                            |                |   |                            |                    |   |                            |               |    |                             |       |
| 252 | endo_pill_nadv_take_spec<br>Show the field ONLY if:<br>[endo_pill_nadv_take_yn] = '1'                                 | For what reasons?                                                                                                                                                                                                                                                                                                  | checkbox, Required<br><table border="1"><tr><td>1</td><td>endo_pill_nadv_take_spec_1</td><td>acne</td></tr><tr><td>2</td><td>endo_pill_nadv_take_spec_2</td><td>alopecia</td></tr><tr><td>3</td><td>endo_pill_nadv_take_spec_3</td><td>excess hair growth</td></tr><tr><td>4</td><td>endo_pill_nadv_take_spec_4</td><td>contraception</td></tr><tr><td>88</td><td>endo_pill_nadv_take_spec_88</td><td>other</td></tr></table> | 1 | endo_pill_nadv_take_spec_1 | acne | 2              | endo_pill_nadv_take_spec_2 | alopecia       | 3 | endo_pill_nadv_take_spec_3 | excess hair growth | 4 | endo_pill_nadv_take_spec_4 | contraception | 88 | endo_pill_nadv_take_spec_88 | other |
| 1   | endo_pill_nadv_take_spec_1                                                                                            | acne                                                                                                                                                                                                                                                                                                               |                                                                                                                                                                                                                                                                                                                                                                                                                               |   |                            |      |                |                            |                |   |                            |                    |   |                            |               |    |                             |       |
| 2   | endo_pill_nadv_take_spec_2                                                                                            | alopecia                                                                                                                                                                                                                                                                                                           |                                                                                                                                                                                                                                                                                                                                                                                                                               |   |                            |      |                |                            |                |   |                            |                    |   |                            |               |    |                             |       |
| 3   | endo_pill_nadv_take_spec_3                                                                                            | excess hair growth                                                                                                                                                                                                                                                                                                 |                                                                                                                                                                                                                                                                                                                                                                                                                               |   |                            |      |                |                            |                |   |                            |                    |   |                            |               |    |                             |       |
| 4   | endo_pill_nadv_take_spec_4                                                                                            | contraception                                                                                                                                                                                                                                                                                                      |                                                                                                                                                                                                                                                                                                                                                                                                                               |   |                            |      |                |                            |                |   |                            |                    |   |                            |               |    |                             |       |
| 88  | endo_pill_nadv_take_spec_88                                                                                           | other                                                                                                                                                                                                                                                                                                              |                                                                                                                                                                                                                                                                                                                                                                                                                               |   |                            |      |                |                            |                |   |                            |                    |   |                            |               |    |                             |       |
| 253 | endo_pill_nadv_take_spec_88<br>Show the field ONLY if:<br>[endo_pill_nadv_take_spec(88)] = '1'                        | What other reasons?<br><i>Please specify.</i>                                                                                                                                                                                                                                                                      | notes, Required                                                                                                                                                                                                                                                                                                                                                                                                               |   |                            |      |                |                            |                |   |                            |                    |   |                            |               |    |                             |       |
| 254 | endo_pill_effect<br>Show the field ONLY if:<br>[endo_pill_adv_take_yn] = '1' and<br>[endo_pill_nadv_take_yn] = '1'    | Was the pill effective against irregular menstruation?                                                                                                                                                                                                                                                             | dropdown, Required<br><table border="1"><tr><td>1</td><td>Yes, completely</td></tr><tr><td>2</td><td>Yes, partially</td></tr><tr><td>0</td><td>No, not at all</td></tr></table>                                                                                                                                                                                                                                               | 1 | Yes, completely            | 2    | Yes, partially | 0                          | No, not at all |   |                            |                    |   |                            |               |    |                             |       |
| 1   | Yes, completely                                                                                                       |                                                                                                                                                                                                                                                                                                                    |                                                                                                                                                                                                                                                                                                                                                                                                                               |   |                            |      |                |                            |                |   |                            |                    |   |                            |               |    |                             |       |
| 2   | Yes, partially                                                                                                        |                                                                                                                                                                                                                                                                                                                    |                                                                                                                                                                                                                                                                                                                                                                                                                               |   |                            |      |                |                            |                |   |                            |                    |   |                            |               |    |                             |       |
| 0   | No, not at all                                                                                                        |                                                                                                                                                                                                                                                                                                                    |                                                                                                                                                                                                                                                                                                                                                                                                                               |   |                            |      |                |                            |                |   |                            |                    |   |                            |               |    |                             |       |
| 255 | endo_pill_effect_88<br>Show the field ONLY if:<br>[endo_pill_adv_take_yn] = '1' and<br>[endo_pill_nadv_take_yn] = '1' | Was the pill effective against other mentioned problems?                                                                                                                                                                                                                                                           | dropdown, Required<br><table border="1"><tr><td>1</td><td>Yes, completely</td></tr><tr><td>2</td><td>Yes, partially</td></tr><tr><td>0</td><td>No, not at all</td></tr></table>                                                                                                                                                                                                                                               | 1 | Yes, completely            | 2    | Yes, partially | 0                          | No, not at all |   |                            |                    |   |                            |               |    |                             |       |
| 1   | Yes, completely                                                                                                       |                                                                                                                                                                                                                                                                                                                    |                                                                                                                                                                                                                                                                                                                                                                                                                               |   |                            |      |                |                            |                |   |                            |                    |   |                            |               |    |                             |       |
| 2   | Yes, partially                                                                                                        |                                                                                                                                                                                                                                                                                                                    |                                                                                                                                                                                                                                                                                                                                                                                                                               |   |                            |      |                |                            |                |   |                            |                    |   |                            |               |    |                             |       |
| 0   | No, not at all                                                                                                        |                                                                                                                                                                                                                                                                                                                    |                                                                                                                                                                                                                                                                                                                                                                                                                               |   |                            |      |                |                            |                |   |                            |                    |   |                            |               |    |                             |       |
| 256 | endo_pill_take_act<br>Show the field ONLY if:<br>[endo_pill_adv_take_yn] = '1' or<br>[endo_pill_nadv_take_yn] = '1'   | Are you currently still taking the contraceptive pill?                                                                                                                                                                                                                                                             | radio, Required<br><table border="1"><tr><td>1</td><td>Yes</td></tr><tr><td>0</td><td>No</td></tr></table>                                                                                                                                                                                                                                                                                                                    | 1 | Yes                        | 0    | No             |                            |                |   |                            |                    |   |                            |               |    |                             |       |
| 1   | Yes                                                                                                                   |                                                                                                                                                                                                                                                                                                                    |                                                                                                                                                                                                                                                                                                                                                                                                                               |   |                            |      |                |                            |                |   |                            |                    |   |                            |               |    |                             |       |
| 0   | No                                                                                                                    |                                                                                                                                                                                                                                                                                                                    |                                                                                                                                                                                                                                                                                                                                                                                                                               |   |                            |      |                |                            |                |   |                            |                    |   |                            |               |    |                             |       |

|     |                                                                                            |                                                                                                                                                                                                                                                                                            |                                                                                                                                                                                                                                                                                                                                                                                                                                                                                                                                                                                                                        |   |                        |                                           |            |                        |                                               |   |                        |                                     |    |                         |                                                   |    |                        |                      |    |                     |       |
|-----|--------------------------------------------------------------------------------------------|--------------------------------------------------------------------------------------------------------------------------------------------------------------------------------------------------------------------------------------------------------------------------------------------|------------------------------------------------------------------------------------------------------------------------------------------------------------------------------------------------------------------------------------------------------------------------------------------------------------------------------------------------------------------------------------------------------------------------------------------------------------------------------------------------------------------------------------------------------------------------------------------------------------------------|---|------------------------|-------------------------------------------|------------|------------------------|-----------------------------------------------|---|------------------------|-------------------------------------|----|-------------------------|---------------------------------------------------|----|------------------------|----------------------|----|---------------------|-------|
| 257 | endo_pill_stop_spec<br>Show the field ONLY if:<br>[endo_pill_take_act] = '0'               | Why did you stop taking the contraceptive pill?                                                                                                                                                                                                                                            | checkbox, Required<br><table border="1"> <tr> <td>1</td> <td>endo_pill_stop_spec_1</td> <td>It helped too little against the problems</td> </tr> <tr> <td>2</td> <td>endo_pill_stop_spec_2</td> <td>I do no longer want to take hormones</td> </tr> <tr> <td>3</td> <td>endo_pill_stop_spec_3</td> <td>desire to have children</td> </tr> <tr> <td>4</td> <td>endo_pill_stop_spec_4</td> <td>side effects</td> </tr> <tr> <td>88</td> <td>endo_pill_stop_spec_88</td> <td>other</td> </tr> </table>                                                                                                                    | 1 | endo_pill_stop_spec_1  | It helped too little against the problems | 2          | endo_pill_stop_spec_2  | I do no longer want to take hormones          | 3 | endo_pill_stop_spec_3  | desire to have children             | 4  | endo_pill_stop_spec_4   | side effects                                      | 88 | endo_pill_stop_spec_88 | other                |    |                     |       |
| 1   | endo_pill_stop_spec_1                                                                      | It helped too little against the problems                                                                                                                                                                                                                                                  |                                                                                                                                                                                                                                                                                                                                                                                                                                                                                                                                                                                                                        |   |                        |                                           |            |                        |                                               |   |                        |                                     |    |                         |                                                   |    |                        |                      |    |                     |       |
| 2   | endo_pill_stop_spec_2                                                                      | I do no longer want to take hormones                                                                                                                                                                                                                                                       |                                                                                                                                                                                                                                                                                                                                                                                                                                                                                                                                                                                                                        |   |                        |                                           |            |                        |                                               |   |                        |                                     |    |                         |                                                   |    |                        |                      |    |                     |       |
| 3   | endo_pill_stop_spec_3                                                                      | desire to have children                                                                                                                                                                                                                                                                    |                                                                                                                                                                                                                                                                                                                                                                                                                                                                                                                                                                                                                        |   |                        |                                           |            |                        |                                               |   |                        |                                     |    |                         |                                                   |    |                        |                      |    |                     |       |
| 4   | endo_pill_stop_spec_4                                                                      | side effects                                                                                                                                                                                                                                                                               |                                                                                                                                                                                                                                                                                                                                                                                                                                                                                                                                                                                                                        |   |                        |                                           |            |                        |                                               |   |                        |                                     |    |                         |                                                   |    |                        |                      |    |                     |       |
| 88  | endo_pill_stop_spec_88                                                                     | other                                                                                                                                                                                                                                                                                      |                                                                                                                                                                                                                                                                                                                                                                                                                                                                                                                                                                                                                        |   |                        |                                           |            |                        |                                               |   |                        |                                     |    |                         |                                                   |    |                        |                      |    |                     |       |
| 258 | endo_pill_stop_spec_88<br>Show the field ONLY if:<br>[endo_pill_stop_spec(88)] = '1'       | What other reasons?<br><i>Please specify.</i>                                                                                                                                                                                                                                              | notes, Required                                                                                                                                                                                                                                                                                                                                                                                                                                                                                                                                                                                                        |   |                        |                                           |            |                        |                                               |   |                        |                                     |    |                         |                                                   |    |                        |                      |    |                     |       |
| 259 | endo_pill_ntake_spec<br>Show the field ONLY if:<br>[endo_pill_adv_take_yn] = '0'           | Why did you decide not to take the pill?                                                                                                                                                                                                                                                   | checkbox, Required<br><table border="1"> <tr> <td>2</td> <td>endo_pill_ntake_spec_2</td> <td>I don't want to take hormones</td> </tr> <tr> <td>3</td> <td>endo_pill_ntake_spec_3</td> <td>desire to have children</td> </tr> <tr> <td>4</td> <td>endo_pill_ntake_spec_4</td> <td>fear of side effects</td> </tr> <tr> <td>88</td> <td>endo_pill_ntake_spec_88</td> <td>other</td> </tr> </table>                                                                                                                                                                                                                       | 2 | endo_pill_ntake_spec_2 | I don't want to take hormones             | 3          | endo_pill_ntake_spec_3 | desire to have children                       | 4 | endo_pill_ntake_spec_4 | fear of side effects                | 88 | endo_pill_ntake_spec_88 | other                                             |    |                        |                      |    |                     |       |
| 2   | endo_pill_ntake_spec_2                                                                     | I don't want to take hormones                                                                                                                                                                                                                                                              |                                                                                                                                                                                                                                                                                                                                                                                                                                                                                                                                                                                                                        |   |                        |                                           |            |                        |                                               |   |                        |                                     |    |                         |                                                   |    |                        |                      |    |                     |       |
| 3   | endo_pill_ntake_spec_3                                                                     | desire to have children                                                                                                                                                                                                                                                                    |                                                                                                                                                                                                                                                                                                                                                                                                                                                                                                                                                                                                                        |   |                        |                                           |            |                        |                                               |   |                        |                                     |    |                         |                                                   |    |                        |                      |    |                     |       |
| 4   | endo_pill_ntake_spec_4                                                                     | fear of side effects                                                                                                                                                                                                                                                                       |                                                                                                                                                                                                                                                                                                                                                                                                                                                                                                                                                                                                                        |   |                        |                                           |            |                        |                                               |   |                        |                                     |    |                         |                                                   |    |                        |                      |    |                     |       |
| 88  | endo_pill_ntake_spec_88                                                                    | other                                                                                                                                                                                                                                                                                      |                                                                                                                                                                                                                                                                                                                                                                                                                                                                                                                                                                                                                        |   |                        |                                           |            |                        |                                               |   |                        |                                     |    |                         |                                                   |    |                        |                      |    |                     |       |
| 260 | endo_pill_ntake_spec_88<br>Show the field ONLY if:<br>[endo_pill_nadv_take_spec(88)] = '1' | What other reasons?<br><i>Please specify.</i>                                                                                                                                                                                                                                              | notes, Required                                                                                                                                                                                                                                                                                                                                                                                                                                                                                                                                                                                                        |   |                        |                                           |            |                        |                                               |   |                        |                                     |    |                         |                                                   |    |                        |                      |    |                     |       |
| 261 | endo_pill_adv_sc<br>Show the field ONLY if:<br>[endo_pill_adv_yn] = '1'                    | Please rate your satisfaction with consultation regarding contraceptive pill?<br><i>Drag the blue slider and drop it at the desired position.</i>                                                                                                                                          | slider (number), Required<br>Slider labels: 0, 50, 100<br>Custom alignment: RH                                                                                                                                                                                                                                                                                                                                                                                                                                                                                                                                         |   |                        |                                           |            |                        |                                               |   |                        |                                     |    |                         |                                                   |    |                        |                      |    |                     |       |
| 262 | endo_pill_adv_wish<br>Show the field ONLY if:<br>[endo_pill_adv_yn] = '0'                  | Would you have wished for a consultation by your gynecologist regarding contraceptive pill?                                                                                                                                                                                                | radio, Required<br><table border="1"> <tr> <td>1</td> <td>Yes</td> </tr> <tr> <td>0</td> <td>No</td> </tr> </table>                                                                                                                                                                                                                                                                                                                                                                                                                                                                                                    | 1 | Yes                    | 0                                         | No         |                        |                                               |   |                        |                                     |    |                         |                                                   |    |                        |                      |    |                     |       |
| 1   | Yes                                                                                        |                                                                                                                                                                                                                                                                                            |                                                                                                                                                                                                                                                                                                                                                                                                                                                                                                                                                                                                                        |   |                        |                                           |            |                        |                                               |   |                        |                                     |    |                         |                                                   |    |                        |                      |    |                     |       |
| 0   | No                                                                                         |                                                                                                                                                                                                                                                                                            |                                                                                                                                                                                                                                                                                                                                                                                                                                                                                                                                                                                                                        |   |                        |                                           |            |                        |                                               |   |                        |                                     |    |                         |                                                   |    |                        |                      |    |                     |       |
| 263 | endo_satisf_sc                                                                             | Section Header: <i>overall satisfaction endometrium / menstrual cycle profile</i><br>Please rate your overall satisfaction with the medical care you receive from your gynecologist regarding menstrual cycle profile?<br><i>Drag the blue slider and drop it at the desired position.</i> | slider (number), Required<br>Slider labels: 0, 50, 100<br>Custom alignment: RH                                                                                                                                                                                                                                                                                                                                                                                                                                                                                                                                         |   |                        |                                           |            |                        |                                               |   |                        |                                     |    |                         |                                                   |    |                        |                      |    |                     |       |
| 264 | endo_addit_yn                                                                              | Would you like additional consultation?                                                                                                                                                                                                                                                    | radio, Required<br><table border="1"> <tr> <td>1</td> <td>Yes</td> </tr> <tr> <td>0</td> <td>No</td> </tr> </table>                                                                                                                                                                                                                                                                                                                                                                                                                                                                                                    | 1 | Yes                    | 0                                         | No         |                        |                                               |   |                        |                                     |    |                         |                                                   |    |                        |                      |    |                     |       |
| 1   | Yes                                                                                        |                                                                                                                                                                                                                                                                                            |                                                                                                                                                                                                                                                                                                                                                                                                                                                                                                                                                                                                                        |   |                        |                                           |            |                        |                                               |   |                        |                                     |    |                         |                                                   |    |                        |                      |    |                     |       |
| 0   | No                                                                                         |                                                                                                                                                                                                                                                                                            |                                                                                                                                                                                                                                                                                                                                                                                                                                                                                                                                                                                                                        |   |                        |                                           |            |                        |                                               |   |                        |                                     |    |                         |                                                   |    |                        |                      |    |                     |       |
| 265 | endo_addit_spec<br>Show the field ONLY if:<br>[endo_addit_yn] = '1'                        | Please select what you would wish to have in addition:                                                                                                                                                                                                                                     | checkbox, Required<br><table border="1"> <tr> <td>1</td> <td>endo_addit_spec__1</td> <td>More consultation and reassurance</td> </tr> <tr> <td>2</td> <td>endo_addit_spec__2</td> <td>More information providing (such as booklets)</td> </tr> <tr> <td>3</td> <td>endo_addit_spec__3</td> <td>More possibilities to ask questions</td> </tr> <tr> <td>4</td> <td>endo_addit_spec__4</td> <td>More examinations (blood tests, ultrasound, etc.)</td> </tr> <tr> <td>5</td> <td>endo_addit_spec__5</td> <td>More therapy options</td> </tr> <tr> <td>88</td> <td>endo_addit_spec__88</td> <td>Other</td> </tr> </table> | 1 | endo_addit_spec__1     | More consultation and reassurance         | 2          | endo_addit_spec__2     | More information providing (such as booklets) | 3 | endo_addit_spec__3     | More possibilities to ask questions | 4  | endo_addit_spec__4      | More examinations (blood tests, ultrasound, etc.) | 5  | endo_addit_spec__5     | More therapy options | 88 | endo_addit_spec__88 | Other |
| 1   | endo_addit_spec__1                                                                         | More consultation and reassurance                                                                                                                                                                                                                                                          |                                                                                                                                                                                                                                                                                                                                                                                                                                                                                                                                                                                                                        |   |                        |                                           |            |                        |                                               |   |                        |                                     |    |                         |                                                   |    |                        |                      |    |                     |       |
| 2   | endo_addit_spec__2                                                                         | More information providing (such as booklets)                                                                                                                                                                                                                                              |                                                                                                                                                                                                                                                                                                                                                                                                                                                                                                                                                                                                                        |   |                        |                                           |            |                        |                                               |   |                        |                                     |    |                         |                                                   |    |                        |                      |    |                     |       |
| 3   | endo_addit_spec__3                                                                         | More possibilities to ask questions                                                                                                                                                                                                                                                        |                                                                                                                                                                                                                                                                                                                                                                                                                                                                                                                                                                                                                        |   |                        |                                           |            |                        |                                               |   |                        |                                     |    |                         |                                                   |    |                        |                      |    |                     |       |
| 4   | endo_addit_spec__4                                                                         | More examinations (blood tests, ultrasound, etc.)                                                                                                                                                                                                                                          |                                                                                                                                                                                                                                                                                                                                                                                                                                                                                                                                                                                                                        |   |                        |                                           |            |                        |                                               |   |                        |                                     |    |                         |                                                   |    |                        |                      |    |                     |       |
| 5   | endo_addit_spec__5                                                                         | More therapy options                                                                                                                                                                                                                                                                       |                                                                                                                                                                                                                                                                                                                                                                                                                                                                                                                                                                                                                        |   |                        |                                           |            |                        |                                               |   |                        |                                     |    |                         |                                                   |    |                        |                      |    |                     |       |
| 88  | endo_addit_spec__88                                                                        | Other                                                                                                                                                                                                                                                                                      |                                                                                                                                                                                                                                                                                                                                                                                                                                                                                                                                                                                                                        |   |                        |                                           |            |                        |                                               |   |                        |                                     |    |                         |                                                   |    |                        |                      |    |                     |       |
| 266 | endo_addit_spec_88<br>Show the field ONLY if:<br>[endo_addit_spec(88)] = '1'               | What other additional consultation?<br><i>Please specify.</i>                                                                                                                                                                                                                              | notes, Required                                                                                                                                                                                                                                                                                                                                                                                                                                                                                                                                                                                                        |   |                        |                                           |            |                        |                                               |   |                        |                                     |    |                         |                                                   |    |                        |                      |    |                     |       |
| 267 | einflussbereich_3_endometrium_complete                                                     | Section Header: <i>Form Status</i><br>Complete?                                                                                                                                                                                                                                            | dropdown<br><table border="1"> <tr> <td>0</td> <td>Incomplete</td> </tr> <tr> <td>1</td> <td>Unverified</td> </tr> <tr> <td>2</td> <td>Complete</td> </tr> </table>                                                                                                                                                                                                                                                                                                                                                                                                                                                    | 0 | Incomplete             | 1                                         | Unverified | 2                      | Complete                                      |   |                        |                                     |    |                         |                                                   |    |                        |                      |    |                     |       |
| 0   | Incomplete                                                                                 |                                                                                                                                                                                                                                                                                            |                                                                                                                                                                                                                                                                                                                                                                                                                                                                                                                                                                                                                        |   |                        |                                           |            |                        |                                               |   |                        |                                     |    |                         |                                                   |    |                        |                      |    |                     |       |
| 1   | Unverified                                                                                 |                                                                                                                                                                                                                                                                                            |                                                                                                                                                                                                                                                                                                                                                                                                                                                                                                                                                                                                                        |   |                        |                                           |            |                        |                                               |   |                        |                                     |    |                         |                                                   |    |                        |                      |    |                     |       |
| 2   | Complete                                                                                   |                                                                                                                                                                                                                                                                                            |                                                                                                                                                                                                                                                                                                                                                                                                                                                                                                                                                                                                                        |   |                        |                                           |            |                        |                                               |   |                        |                                     |    |                         |                                                   |    |                        |                      |    |                     |       |

|     |                                                                                                                                                                                                                                                                                                                       |                                                                                                                                                                            |                                                                                                                                                                                                                                                                                                                                                                                                                                                                       |   |               |   |            |    |            |   |            |   |             |   |           |   |           |   |           |   |                   |    |         |    |         |    |         |
|-----|-----------------------------------------------------------------------------------------------------------------------------------------------------------------------------------------------------------------------------------------------------------------------------------------------------------------------|----------------------------------------------------------------------------------------------------------------------------------------------------------------------------|-----------------------------------------------------------------------------------------------------------------------------------------------------------------------------------------------------------------------------------------------------------------------------------------------------------------------------------------------------------------------------------------------------------------------------------------------------------------------|---|---------------|---|------------|----|------------|---|------------|---|-------------|---|-----------|---|-----------|---|-----------|---|-------------------|----|---------|----|---------|----|---------|
| 268 | kw_yn                                                                                                                                                                                                                                                                                                                 | Section Header: <i>fertility</i><br>Do you ever wish to have children?                                                                                                     | radio, Required<br><table border="1"> <tr><td>1</td><td>Yes</td></tr> <tr><td>0</td><td>No</td></tr> <tr><td>99</td><td>Unknown</td></tr> </table>                                                                                                                                                                                                                                                                                                                    | 1 | Yes           | 0 | No         | 99 | Unknown    |   |            |   |             |   |           |   |           |   |           |   |                   |    |         |    |         |    |         |
| 1   | Yes                                                                                                                                                                                                                                                                                                                   |                                                                                                                                                                            |                                                                                                                                                                                                                                                                                                                                                                                                                                                                       |   |               |   |            |    |            |   |            |   |             |   |           |   |           |   |           |   |                   |    |         |    |         |    |         |
| 0   | No                                                                                                                                                                                                                                                                                                                    |                                                                                                                                                                            |                                                                                                                                                                                                                                                                                                                                                                                                                                                                       |   |               |   |            |    |            |   |            |   |             |   |           |   |           |   |           |   |                   |    |         |    |         |    |         |
| 99  | Unknown                                                                                                                                                                                                                                                                                                               |                                                                                                                                                                            |                                                                                                                                                                                                                                                                                                                                                                                                                                                                       |   |               |   |            |    |            |   |            |   |             |   |           |   |           |   |           |   |                   |    |         |    |         |    |         |
| 269 | kw_act_yn<br>Show the field ONLY if: [kw_yn] = '1'                                                                                                                                                                                                                                                                    | Do you currently want children?<br><i>This refers to te wish to have children as soon as possible. For this, no attempts to become pregnant must have taken place yet.</i> | radio, Required<br><table border="1"> <tr><td>1</td><td>Yes</td></tr> <tr><td>0</td><td>No</td></tr> </table>                                                                                                                                                                                                                                                                                                                                                         | 1 | Yes           | 0 | No         |    |            |   |            |   |             |   |           |   |           |   |           |   |                   |    |         |    |         |    |         |
| 1   | Yes                                                                                                                                                                                                                                                                                                                   |                                                                                                                                                                            |                                                                                                                                                                                                                                                                                                                                                                                                                                                                       |   |               |   |            |    |            |   |            |   |             |   |           |   |           |   |           |   |                   |    |         |    |         |    |         |
| 0   | No                                                                                                                                                                                                                                                                                                                    |                                                                                                                                                                            |                                                                                                                                                                                                                                                                                                                                                                                                                                                                       |   |               |   |            |    |            |   |            |   |             |   |           |   |           |   |           |   |                   |    |         |    |         |    |         |
| 270 | kw_act_nr<br>Show the field ONLY if: [kw_act_yn] = '1'                                                                                                                                                                                                                                                                | Approximately how long have you already been wanting to have children?                                                                                                     | dropdown, Required<br><table border="1"> <tr><td>1</td><td>up to 1 month</td></tr> <tr><td>2</td><td>1-3 months</td></tr> <tr><td>3</td><td>3-6 months</td></tr> <tr><td>4</td><td>6-9 months</td></tr> <tr><td>5</td><td>9-12 months</td></tr> <tr><td>6</td><td>1-2 years</td></tr> <tr><td>7</td><td>2-3 years</td></tr> <tr><td>8</td><td>3-4 years</td></tr> <tr><td>9</td><td>more than 4 years</td></tr> <tr><td>99</td><td>Unknown</td></tr> </table>         | 1 | up to 1 month | 2 | 1-3 months | 3  | 3-6 months | 4 | 6-9 months | 5 | 9-12 months | 6 | 1-2 years | 7 | 2-3 years | 8 | 3-4 years | 9 | more than 4 years | 99 | Unknown |    |         |    |         |
| 1   | up to 1 month                                                                                                                                                                                                                                                                                                         |                                                                                                                                                                            |                                                                                                                                                                                                                                                                                                                                                                                                                                                                       |   |               |   |            |    |            |   |            |   |             |   |           |   |           |   |           |   |                   |    |         |    |         |    |         |
| 2   | 1-3 months                                                                                                                                                                                                                                                                                                            |                                                                                                                                                                            |                                                                                                                                                                                                                                                                                                                                                                                                                                                                       |   |               |   |            |    |            |   |            |   |             |   |           |   |           |   |           |   |                   |    |         |    |         |    |         |
| 3   | 3-6 months                                                                                                                                                                                                                                                                                                            |                                                                                                                                                                            |                                                                                                                                                                                                                                                                                                                                                                                                                                                                       |   |               |   |            |    |            |   |            |   |             |   |           |   |           |   |           |   |                   |    |         |    |         |    |         |
| 4   | 6-9 months                                                                                                                                                                                                                                                                                                            |                                                                                                                                                                            |                                                                                                                                                                                                                                                                                                                                                                                                                                                                       |   |               |   |            |    |            |   |            |   |             |   |           |   |           |   |           |   |                   |    |         |    |         |    |         |
| 5   | 9-12 months                                                                                                                                                                                                                                                                                                           |                                                                                                                                                                            |                                                                                                                                                                                                                                                                                                                                                                                                                                                                       |   |               |   |            |    |            |   |            |   |             |   |           |   |           |   |           |   |                   |    |         |    |         |    |         |
| 6   | 1-2 years                                                                                                                                                                                                                                                                                                             |                                                                                                                                                                            |                                                                                                                                                                                                                                                                                                                                                                                                                                                                       |   |               |   |            |    |            |   |            |   |             |   |           |   |           |   |           |   |                   |    |         |    |         |    |         |
| 7   | 2-3 years                                                                                                                                                                                                                                                                                                             |                                                                                                                                                                            |                                                                                                                                                                                                                                                                                                                                                                                                                                                                       |   |               |   |            |    |            |   |            |   |             |   |           |   |           |   |           |   |                   |    |         |    |         |    |         |
| 8   | 3-4 years                                                                                                                                                                                                                                                                                                             |                                                                                                                                                                            |                                                                                                                                                                                                                                                                                                                                                                                                                                                                       |   |               |   |            |    |            |   |            |   |             |   |           |   |           |   |           |   |                   |    |         |    |         |    |         |
| 9   | more than 4 years                                                                                                                                                                                                                                                                                                     |                                                                                                                                                                            |                                                                                                                                                                                                                                                                                                                                                                                                                                                                       |   |               |   |            |    |            |   |            |   |             |   |           |   |           |   |           |   |                   |    |         |    |         |    |         |
| 99  | Unknown                                                                                                                                                                                                                                                                                                               |                                                                                                                                                                            |                                                                                                                                                                                                                                                                                                                                                                                                                                                                       |   |               |   |            |    |            |   |            |   |             |   |           |   |           |   |           |   |                   |    |         |    |         |    |         |
| 271 | kw_nact_nr<br>Show the field ONLY if: [kw_act_yn] = '0'                                                                                                                                                                                                                                                               | In appoximateley how many years do you wish to have children?                                                                                                              | dropdown, Required<br><table border="1"> <tr><td>1</td><td>1</td></tr> <tr><td>2</td><td>2</td></tr> <tr><td>3</td><td>3</td></tr> <tr><td>4</td><td>4</td></tr> <tr><td>5</td><td>5</td></tr> <tr><td>6</td><td>6</td></tr> <tr><td>7</td><td>7</td></tr> <tr><td>8</td><td>8</td></tr> <tr><td>9</td><td>9</td></tr> <tr><td>10</td><td>10</td></tr> <tr><td>11</td><td>über 10</td></tr> <tr><td>99</td><td>Unknown</td></tr> </table> <p>Custom alignment: RH</p> | 1 | 1             | 2 | 2          | 3  | 3          | 4 | 4          | 5 | 5           | 6 | 6         | 7 | 7         | 8 | 8         | 9 | 9                 | 10 | 10      | 11 | über 10 | 99 | Unknown |
| 1   | 1                                                                                                                                                                                                                                                                                                                     |                                                                                                                                                                            |                                                                                                                                                                                                                                                                                                                                                                                                                                                                       |   |               |   |            |    |            |   |            |   |             |   |           |   |           |   |           |   |                   |    |         |    |         |    |         |
| 2   | 2                                                                                                                                                                                                                                                                                                                     |                                                                                                                                                                            |                                                                                                                                                                                                                                                                                                                                                                                                                                                                       |   |               |   |            |    |            |   |            |   |             |   |           |   |           |   |           |   |                   |    |         |    |         |    |         |
| 3   | 3                                                                                                                                                                                                                                                                                                                     |                                                                                                                                                                            |                                                                                                                                                                                                                                                                                                                                                                                                                                                                       |   |               |   |            |    |            |   |            |   |             |   |           |   |           |   |           |   |                   |    |         |    |         |    |         |
| 4   | 4                                                                                                                                                                                                                                                                                                                     |                                                                                                                                                                            |                                                                                                                                                                                                                                                                                                                                                                                                                                                                       |   |               |   |            |    |            |   |            |   |             |   |           |   |           |   |           |   |                   |    |         |    |         |    |         |
| 5   | 5                                                                                                                                                                                                                                                                                                                     |                                                                                                                                                                            |                                                                                                                                                                                                                                                                                                                                                                                                                                                                       |   |               |   |            |    |            |   |            |   |             |   |           |   |           |   |           |   |                   |    |         |    |         |    |         |
| 6   | 6                                                                                                                                                                                                                                                                                                                     |                                                                                                                                                                            |                                                                                                                                                                                                                                                                                                                                                                                                                                                                       |   |               |   |            |    |            |   |            |   |             |   |           |   |           |   |           |   |                   |    |         |    |         |    |         |
| 7   | 7                                                                                                                                                                                                                                                                                                                     |                                                                                                                                                                            |                                                                                                                                                                                                                                                                                                                                                                                                                                                                       |   |               |   |            |    |            |   |            |   |             |   |           |   |           |   |           |   |                   |    |         |    |         |    |         |
| 8   | 8                                                                                                                                                                                                                                                                                                                     |                                                                                                                                                                            |                                                                                                                                                                                                                                                                                                                                                                                                                                                                       |   |               |   |            |    |            |   |            |   |             |   |           |   |           |   |           |   |                   |    |         |    |         |    |         |
| 9   | 9                                                                                                                                                                                                                                                                                                                     |                                                                                                                                                                            |                                                                                                                                                                                                                                                                                                                                                                                                                                                                       |   |               |   |            |    |            |   |            |   |             |   |           |   |           |   |           |   |                   |    |         |    |         |    |         |
| 10  | 10                                                                                                                                                                                                                                                                                                                    |                                                                                                                                                                            |                                                                                                                                                                                                                                                                                                                                                                                                                                                                       |   |               |   |            |    |            |   |            |   |             |   |           |   |           |   |           |   |                   |    |         |    |         |    |         |
| 11  | über 10                                                                                                                                                                                                                                                                                                               |                                                                                                                                                                            |                                                                                                                                                                                                                                                                                                                                                                                                                                                                       |   |               |   |            |    |            |   |            |   |             |   |           |   |           |   |           |   |                   |    |         |    |         |    |         |
| 99  | Unknown                                                                                                                                                                                                                                                                                                               |                                                                                                                                                                            |                                                                                                                                                                                                                                                                                                                                                                                                                                                                       |   |               |   |            |    |            |   |            |   |             |   |           |   |           |   |           |   |                   |    |         |    |         |    |         |
| 272 | kw_adv_yn<br>Show the field ONLY if: [kw_yn] = '1' or [kw_yn] = '99'                                                                                                                                                                                                                                                  | Have you been consultet by your gynecologists about fertility?<br><i>Informed about possible difficulties and possibilities.</i>                                           | radio, Required<br><table border="1"> <tr><td>1</td><td>Yes</td></tr> <tr><td>0</td><td>No</td></tr> </table>                                                                                                                                                                                                                                                                                                                                                         | 1 | Yes           | 0 | No         |    |            |   |            |   |             |   |           |   |           |   |           |   |                   |    |         |    |         |    |         |
| 1   | Yes                                                                                                                                                                                                                                                                                                                   |                                                                                                                                                                            |                                                                                                                                                                                                                                                                                                                                                                                                                                                                       |   |               |   |            |    |            |   |            |   |             |   |           |   |           |   |           |   |                   |    |         |    |         |    |         |
| 0   | No                                                                                                                                                                                                                                                                                                                    |                                                                                                                                                                            |                                                                                                                                                                                                                                                                                                                                                                                                                                                                       |   |               |   |            |    |            |   |            |   |             |   |           |   |           |   |           |   |                   |    |         |    |         |    |         |
| 273 | kw_adv_sc<br>Show the field ONLY if: [kw_adv_yn] = '1'                                                                                                                                                                                                                                                                | Please rate your satisfaction with consultation regarding fertility?<br><i>Drag the blue slider and drop it at the desired position.</i>                                   | slider (number), Required<br>Slider labels: 0, 50, 100<br>Custom alignment: RH                                                                                                                                                                                                                                                                                                                                                                                        |   |               |   |            |    |            |   |            |   |             |   |           |   |           |   |           |   |                   |    |         |    |         |    |         |
| 274 | kw_adv_wish<br>Show the field ONLY if: [kw_adv_yn] = '0'                                                                                                                                                                                                                                                              | Would you have wished for a consultation by your gynecologist regarding fertility?                                                                                         | radio, Required<br><table border="1"> <tr><td>1</td><td>Yes</td></tr> <tr><td>0</td><td>No</td></tr> </table>                                                                                                                                                                                                                                                                                                                                                         | 1 | Yes           | 0 | No         |    |            |   |            |   |             |   |           |   |           |   |           |   |                   |    |         |    |         |    |         |
| 1   | Yes                                                                                                                                                                                                                                                                                                                   |                                                                                                                                                                            |                                                                                                                                                                                                                                                                                                                                                                                                                                                                       |   |               |   |            |    |            |   |            |   |             |   |           |   |           |   |           |   |                   |    |         |    |         |    |         |
| 0   | No                                                                                                                                                                                                                                                                                                                    |                                                                                                                                                                            |                                                                                                                                                                                                                                                                                                                                                                                                                                                                       |   |               |   |            |    |            |   |            |   |             |   |           |   |           |   |           |   |                   |    |         |    |         |    |         |
| 275 | kw_ss_yn<br>Show the field ONLY if: [children_nr] = '0'                                                                                                                                                                                                                                                               | Section Header: <i>pregnancy</i><br>Have you ever been pregnant?                                                                                                           | radio, Required<br><table border="1"> <tr><td>1</td><td>Yes</td></tr> <tr><td>0</td><td>No</td></tr> </table>                                                                                                                                                                                                                                                                                                                                                         | 1 | Yes           | 0 | No         |    |            |   |            |   |             |   |           |   |           |   |           |   |                   |    |         |    |         |    |         |
| 1   | Yes                                                                                                                                                                                                                                                                                                                   |                                                                                                                                                                            |                                                                                                                                                                                                                                                                                                                                                                                                                                                                       |   |               |   |            |    |            |   |            |   |             |   |           |   |           |   |           |   |                   |    |         |    |         |    |         |
| 0   | No                                                                                                                                                                                                                                                                                                                    |                                                                                                                                                                            |                                                                                                                                                                                                                                                                                                                                                                                                                                                                       |   |               |   |            |    |            |   |            |   |             |   |           |   |           |   |           |   |                   |    |         |    |         |    |         |
| 276 | kw_ss_nr<br>Show the field ONLY if: [kw_ss_yn] = '1' or ([children_nr] = '1' or [children_nr] = '2' or [children_nr] = '3' or [children_nr] = '4' or [children_nr] = '5' or [children_nr] = '6' or [children_nr] = '7' or [children_nr] = '8' or [children_nr] = '9' or [children_nr] = '10' or [children_nr] = '11') | How many times have you been pregnant?<br><i>Including miscarriages and/or elective abortions. Please write the number of pregnancies (e.g. 3).</i>                        | text (number, Min: 1), Required                                                                                                                                                                                                                                                                                                                                                                                                                                       |   |               |   |            |    |            |   |            |   |             |   |           |   |           |   |           |   |                   |    |         |    |         |    |         |
| 277 | kw_ss_abort_fehl_yn<br>Show the field ONLY if: [kw_ss_yn] = '1'                                                                                                                                                                                                                                                       | Have you ever had a miscarriage?                                                                                                                                           | radio, Required<br><table border="1"> <tr><td>1</td><td>Yes</td></tr> <tr><td>0</td><td>No</td></tr> </table>                                                                                                                                                                                                                                                                                                                                                         | 1 | Yes           | 0 | No         |    |            |   |            |   |             |   |           |   |           |   |           |   |                   |    |         |    |         |    |         |
| 1   | Yes                                                                                                                                                                                                                                                                                                                   |                                                                                                                                                                            |                                                                                                                                                                                                                                                                                                                                                                                                                                                                       |   |               |   |            |    |            |   |            |   |             |   |           |   |           |   |           |   |                   |    |         |    |         |    |         |
| 0   | No                                                                                                                                                                                                                                                                                                                    |                                                                                                                                                                            |                                                                                                                                                                                                                                                                                                                                                                                                                                                                       |   |               |   |            |    |            |   |            |   |             |   |           |   |           |   |           |   |                   |    |         |    |         |    |         |
| 278 | kw_ss_abort_fehl_nr<br>Show the field ONLY if: [kw_ss_abort_fehl_yn] = '1'                                                                                                                                                                                                                                            | How many pregnancies ended in miscarriage??<br><i>Please write a number.</i>                                                                                               | text (number, Min: 1), Required                                                                                                                                                                                                                                                                                                                                                                                                                                       |   |               |   |            |    |            |   |            |   |             |   |           |   |           |   |           |   |                   |    |         |    |         |    |         |

|     |                                                                                        |                                                                                                                                                                                                                                |                                                                                                                                                                                                                                                                                                                                                                                                                                                                                                                                                                      |   |                         |                                               |              |                         |                                                                    |   |                         |                                                            |              |                        |                                                       |    |                         |       |
|-----|----------------------------------------------------------------------------------------|--------------------------------------------------------------------------------------------------------------------------------------------------------------------------------------------------------------------------------|----------------------------------------------------------------------------------------------------------------------------------------------------------------------------------------------------------------------------------------------------------------------------------------------------------------------------------------------------------------------------------------------------------------------------------------------------------------------------------------------------------------------------------------------------------------------|---|-------------------------|-----------------------------------------------|--------------|-------------------------|--------------------------------------------------------------------|---|-------------------------|------------------------------------------------------------|--------------|------------------------|-------------------------------------------------------|----|-------------------------|-------|
| 279 | kw_ss_abort_fehl_time<br>Show the field ONLY if:<br>[kw_ss_abort_fehl_yn] = '1'        | How far advanced was the pregnancy when you suffered a miscarriage.<br><i>If you have had multiple miscarriages, you can select multiple fields..</i>                                                                          | checkbox, Required<br><table border="1"> <tr> <td>1</td> <td>kw_ss_abort_fehl_time_1</td> <td>&lt; 12th week of pregnancy (early miscarriage)</td> </tr> <tr> <td>2</td> <td>kw_ss_abort_fehl_time_2</td> <td>12th - 22th week of pregnancy (late miscarriage)</td> </tr> <tr> <td>3</td> <td>kw_ss_abort_fehl_time_3</td> <td>&gt;22th week of pregnancy and / or weight &gt;500g (stillbirth)</td> </tr> </table>                                                                                                                                                  | 1 | kw_ss_abort_fehl_time_1 | < 12th week of pregnancy (early miscarriage)  | 2            | kw_ss_abort_fehl_time_2 | 12th - 22th week of pregnancy (late miscarriage)                   | 3 | kw_ss_abort_fehl_time_3 | >22th week of pregnancy and / or weight >500g (stillbirth) |              |                        |                                                       |    |                         |       |
| 1   | kw_ss_abort_fehl_time_1                                                                | < 12th week of pregnancy (early miscarriage)                                                                                                                                                                                   |                                                                                                                                                                                                                                                                                                                                                                                                                                                                                                                                                                      |   |                         |                                               |              |                         |                                                                    |   |                         |                                                            |              |                        |                                                       |    |                         |       |
| 2   | kw_ss_abort_fehl_time_2                                                                | 12th - 22th week of pregnancy (late miscarriage)                                                                                                                                                                               |                                                                                                                                                                                                                                                                                                                                                                                                                                                                                                                                                                      |   |                         |                                               |              |                         |                                                                    |   |                         |                                                            |              |                        |                                                       |    |                         |       |
| 3   | kw_ss_abort_fehl_time_3                                                                | >22th week of pregnancy and / or weight >500g (stillbirth)                                                                                                                                                                     |                                                                                                                                                                                                                                                                                                                                                                                                                                                                                                                                                                      |   |                         |                                               |              |                         |                                                                    |   |                         |                                                            |              |                        |                                                       |    |                         |       |
| 280 | kw_ss_abort_abbr_yn<br>Show the field ONLY if: [kw_ss_yn] = '1'                        | Have you ever had an elective abortion?                                                                                                                                                                                        | radio, Required<br><table border="1"> <tr> <td>1</td> <td>Yes</td> </tr> <tr> <td>0</td> <td>No</td> </tr> </table>                                                                                                                                                                                                                                                                                                                                                                                                                                                  | 1 | Yes                     | 0                                             | No           |                         |                                                                    |   |                         |                                                            |              |                        |                                                       |    |                         |       |
| 1   | Yes                                                                                    |                                                                                                                                                                                                                                |                                                                                                                                                                                                                                                                                                                                                                                                                                                                                                                                                                      |   |                         |                                               |              |                         |                                                                    |   |                         |                                                            |              |                        |                                                       |    |                         |       |
| 0   | No                                                                                     |                                                                                                                                                                                                                                |                                                                                                                                                                                                                                                                                                                                                                                                                                                                                                                                                                      |   |                         |                                               |              |                         |                                                                    |   |                         |                                                            |              |                        |                                                       |    |                         |       |
| 281 | kw_ss_abort_abbr_nr<br>Show the field ONLY if:<br>[kw_ss_abort_abbr_yn] = '1'          | How many pregnancies ended in an elective abortion?<br><i>Please write a number.</i>                                                                                                                                           | text (number, Min: 1), Required                                                                                                                                                                                                                                                                                                                                                                                                                                                                                                                                      |   |                         |                                               |              |                         |                                                                    |   |                         |                                                            |              |                        |                                                       |    |                         |       |
| 282 | kw_ss_infert_yn                                                                        | Have you ever tried to get pregnant for more than 1 year without success?<br><i>Trying to get pregnant = regular, unprotected sexual intercourse at the right time of the menstrual cycle</i>                                  | radio, Required<br><table border="1"> <tr> <td>1</td> <td>Yes</td> </tr> <tr> <td>0</td> <td>No</td> </tr> </table>                                                                                                                                                                                                                                                                                                                                                                                                                                                  | 1 | Yes                     | 0                                             | No           |                         |                                                                    |   |                         |                                                            |              |                        |                                                       |    |                         |       |
| 1   | Yes                                                                                    |                                                                                                                                                                                                                                |                                                                                                                                                                                                                                                                                                                                                                                                                                                                                                                                                                      |   |                         |                                               |              |                         |                                                                    |   |                         |                                                            |              |                        |                                                       |    |                         |       |
| 0   | No                                                                                     |                                                                                                                                                                                                                                |                                                                                                                                                                                                                                                                                                                                                                                                                                                                                                                                                                      |   |                         |                                               |              |                         |                                                                    |   |                         |                                                            |              |                        |                                                       |    |                         |       |
| 283 | kw_ss_infert_act_yn<br>Show the field ONLY if:<br>[kw_ss_infert_yn] = '1'              | Are you currently trying to get pregnant for more than a year?                                                                                                                                                                 | radio, Required<br><table border="1"> <tr> <td>1</td> <td>Yes</td> </tr> <tr> <td>0</td> <td>No</td> </tr> </table>                                                                                                                                                                                                                                                                                                                                                                                                                                                  | 1 | Yes                     | 0                                             | No           |                         |                                                                    |   |                         |                                                            |              |                        |                                                       |    |                         |       |
| 1   | Yes                                                                                    |                                                                                                                                                                                                                                |                                                                                                                                                                                                                                                                                                                                                                                                                                                                                                                                                                      |   |                         |                                               |              |                         |                                                                    |   |                         |                                                            |              |                        |                                                       |    |                         |       |
| 0   | No                                                                                     |                                                                                                                                                                                                                                |                                                                                                                                                                                                                                                                                                                                                                                                                                                                                                                                                                      |   |                         |                                               |              |                         |                                                                    |   |                         |                                                            |              |                        |                                                       |    |                         |       |
| 284 | kw_ss_infert_act_nr<br>Show the field ONLY if:<br>[kw_ss_infert_act_yn] = '1'          | How long have you already been trying to get pregnant?                                                                                                                                                                         | dropdown, Required<br><table border="1"> <tr> <td>1</td> <td>12 months</td> </tr> <tr> <td>2</td> <td>12-18 months</td> </tr> <tr> <td>3</td> <td>18-24 months</td> </tr> <tr> <td>4</td> <td>24-36 months</td> </tr> <tr> <td>5</td> <td>36-48 months</td> </tr> <tr> <td>6</td> <td>more than 4 years</td> </tr> </table>                                                                                                                                                                                                                                          | 1 | 12 months               | 2                                             | 12-18 months | 3                       | 18-24 months                                                       | 4 | 24-36 months            | 5                                                          | 36-48 months | 6                      | more than 4 years                                     |    |                         |       |
| 1   | 12 months                                                                              |                                                                                                                                                                                                                                |                                                                                                                                                                                                                                                                                                                                                                                                                                                                                                                                                                      |   |                         |                                               |              |                         |                                                                    |   |                         |                                                            |              |                        |                                                       |    |                         |       |
| 2   | 12-18 months                                                                           |                                                                                                                                                                                                                                |                                                                                                                                                                                                                                                                                                                                                                                                                                                                                                                                                                      |   |                         |                                               |              |                         |                                                                    |   |                         |                                                            |              |                        |                                                       |    |                         |       |
| 3   | 18-24 months                                                                           |                                                                                                                                                                                                                                |                                                                                                                                                                                                                                                                                                                                                                                                                                                                                                                                                                      |   |                         |                                               |              |                         |                                                                    |   |                         |                                                            |              |                        |                                                       |    |                         |       |
| 4   | 24-36 months                                                                           |                                                                                                                                                                                                                                |                                                                                                                                                                                                                                                                                                                                                                                                                                                                                                                                                                      |   |                         |                                               |              |                         |                                                                    |   |                         |                                                            |              |                        |                                                       |    |                         |       |
| 5   | 36-48 months                                                                           |                                                                                                                                                                                                                                |                                                                                                                                                                                                                                                                                                                                                                                                                                                                                                                                                                      |   |                         |                                               |              |                         |                                                                    |   |                         |                                                            |              |                        |                                                       |    |                         |       |
| 6   | more than 4 years                                                                      |                                                                                                                                                                                                                                |                                                                                                                                                                                                                                                                                                                                                                                                                                                                                                                                                                      |   |                         |                                               |              |                         |                                                                    |   |                         |                                                            |              |                        |                                                       |    |                         |       |
| 285 | kw_ss_infert_past_nr<br>Show the field ONLY if:<br>[kw_ss_infert_act_yn] = '0'         | How long has it been since you unsuccessfully tried to get pregnant for more than a year?<br><i>Please give the number in full years (z.B.: 4)</i>                                                                             | text (number), Required                                                                                                                                                                                                                                                                                                                                                                                                                                                                                                                                              |   |                         |                                               |              |                         |                                                                    |   |                         |                                                            |              |                        |                                                       |    |                         |       |
| 286 | kw_ss_infert_past_trynr<br>Show the field ONLY if:<br>[kw_ss_infert_act_yn] = '0'      | For how long did you unsuccessfully try to get pregnant at that time?                                                                                                                                                          | dropdown, Required<br><table border="1"> <tr> <td>1</td> <td>12 months</td> </tr> <tr> <td>2</td> <td>12-18 months</td> </tr> <tr> <td>3</td> <td>18-24 months</td> </tr> <tr> <td>4</td> <td>24-36 months</td> </tr> <tr> <td>5</td> <td>36-48 months</td> </tr> <tr> <td>6</td> <td>more than 4 years</td> </tr> </table>                                                                                                                                                                                                                                          | 1 | 12 months               | 2                                             | 12-18 months | 3                       | 18-24 months                                                       | 4 | 24-36 months            | 5                                                          | 36-48 months | 6                      | more than 4 years                                     |    |                         |       |
| 1   | 12 months                                                                              |                                                                                                                                                                                                                                |                                                                                                                                                                                                                                                                                                                                                                                                                                                                                                                                                                      |   |                         |                                               |              |                         |                                                                    |   |                         |                                                            |              |                        |                                                       |    |                         |       |
| 2   | 12-18 months                                                                           |                                                                                                                                                                                                                                |                                                                                                                                                                                                                                                                                                                                                                                                                                                                                                                                                                      |   |                         |                                               |              |                         |                                                                    |   |                         |                                                            |              |                        |                                                       |    |                         |       |
| 3   | 18-24 months                                                                           |                                                                                                                                                                                                                                |                                                                                                                                                                                                                                                                                                                                                                                                                                                                                                                                                                      |   |                         |                                               |              |                         |                                                                    |   |                         |                                                            |              |                        |                                                       |    |                         |       |
| 4   | 24-36 months                                                                           |                                                                                                                                                                                                                                |                                                                                                                                                                                                                                                                                                                                                                                                                                                                                                                                                                      |   |                         |                                               |              |                         |                                                                    |   |                         |                                                            |              |                        |                                                       |    |                         |       |
| 5   | 36-48 months                                                                           |                                                                                                                                                                                                                                |                                                                                                                                                                                                                                                                                                                                                                                                                                                                                                                                                                      |   |                         |                                               |              |                         |                                                                    |   |                         |                                                            |              |                        |                                                       |    |                         |       |
| 6   | more than 4 years                                                                      |                                                                                                                                                                                                                                |                                                                                                                                                                                                                                                                                                                                                                                                                                                                                                                                                                      |   |                         |                                               |              |                         |                                                                    |   |                         |                                                            |              |                        |                                                       |    |                         |       |
| 287 | kw_ss_infert_adv_yn<br>Show the field ONLY if:<br>[kw_ss_infert_yn] = '1'              | Have you been consulted by your gynecologists about these unsuccessful pregnancy attempts?<br><i>Informed about possible reasons and possibilities.</i>                                                                        | radio, Required<br><table border="1"> <tr> <td>1</td> <td>Yes</td> </tr> <tr> <td>0</td> <td>No</td> </tr> </table>                                                                                                                                                                                                                                                                                                                                                                                                                                                  | 1 | Yes                     | 0                                             | No           |                         |                                                                    |   |                         |                                                            |              |                        |                                                       |    |                         |       |
| 1   | Yes                                                                                    |                                                                                                                                                                                                                                |                                                                                                                                                                                                                                                                                                                                                                                                                                                                                                                                                                      |   |                         |                                               |              |                         |                                                                    |   |                         |                                                            |              |                        |                                                       |    |                         |       |
| 0   | No                                                                                     |                                                                                                                                                                                                                                |                                                                                                                                                                                                                                                                                                                                                                                                                                                                                                                                                                      |   |                         |                                               |              |                         |                                                                    |   |                         |                                                            |              |                        |                                                       |    |                         |       |
| 288 | kw_ss_infert_adv_sc<br>Show the field ONLY if:<br>[kw_ss_infert_adv_yn] = '1'          | Please rate your satisfaction with consultation regarding unsuccessful pregnancy attempts?<br><i>Drag the blue slider and drop it at the desired position.</i>                                                                 | slider (number), Required<br>Slider labels: 0, 50, 100<br>Custom alignment: RH                                                                                                                                                                                                                                                                                                                                                                                                                                                                                       |   |                         |                                               |              |                         |                                                                    |   |                         |                                                            |              |                        |                                                       |    |                         |       |
| 289 | kw_ss_infert_adv_wish<br>Show the field ONLY if:<br>[kw_ss_infert_adv_yn] = '0'        | Would you have wished for a consultation by your gynecologist regarding unsuccessful pregnancy attempts?                                                                                                                       | radio, Required<br><table border="1"> <tr> <td>1</td> <td>Yes</td> </tr> <tr> <td>0</td> <td>No</td> </tr> </table>                                                                                                                                                                                                                                                                                                                                                                                                                                                  | 1 | Yes                     | 0                                             | No           |                         |                                                                    |   |                         |                                                            |              |                        |                                                       |    |                         |       |
| 1   | Yes                                                                                    |                                                                                                                                                                                                                                |                                                                                                                                                                                                                                                                                                                                                                                                                                                                                                                                                                      |   |                         |                                               |              |                         |                                                                    |   |                         |                                                            |              |                        |                                                       |    |                         |       |
| 0   | No                                                                                     |                                                                                                                                                                                                                                |                                                                                                                                                                                                                                                                                                                                                                                                                                                                                                                                                                      |   |                         |                                               |              |                         |                                                                    |   |                         |                                                            |              |                        |                                                       |    |                         |       |
| 290 | kw_ss_infert_th_yn<br>Show the field ONLY if:<br>[kw_ss_infert_yn] = '1'               | Have you tried any therapy to get pregnant?<br><i>If you are not sure about that you can select "Yes" to have a look at the therapy options. If there isn't anything suitable you can change to "No" again.</i>                | radio, Required<br><table border="1"> <tr> <td>1</td> <td>Yes</td> </tr> <tr> <td>0</td> <td>No</td> </tr> </table>                                                                                                                                                                                                                                                                                                                                                                                                                                                  | 1 | Yes                     | 0                                             | No           |                         |                                                                    |   |                         |                                                            |              |                        |                                                       |    |                         |       |
| 1   | Yes                                                                                    |                                                                                                                                                                                                                                |                                                                                                                                                                                                                                                                                                                                                                                                                                                                                                                                                                      |   |                         |                                               |              |                         |                                                                    |   |                         |                                                            |              |                        |                                                       |    |                         |       |
| 0   | No                                                                                     |                                                                                                                                                                                                                                |                                                                                                                                                                                                                                                                                                                                                                                                                                                                                                                                                                      |   |                         |                                               |              |                         |                                                                    |   |                         |                                                            |              |                        |                                                       |    |                         |       |
| 291 | kw_ss_infert_th_spec<br>Show the field ONLY if:<br>[kw_ss_infert_th_yn] = '1'          | Which therapy method have you tried already?<br><i>If you are not sure about one of the options you can select it to have a look at the sub-categories. If there isn't anything suitable you can uncheck the option again.</i> | checkbox, Required<br><table border="1"> <tr> <td>1</td> <td>kw_ss_infert_th_spec_1</td> <td>lifestyle intervention (diet, exercise, etc.)</td> </tr> <tr> <td>2</td> <td>kw_ss_infert_th_spec__2</td> <td>medication (pills or injections for stimulation of egg maturation)</td> </tr> <tr> <td>3</td> <td>kw_ss_infert_th_spec_3</td> <td>surgery</td> </tr> <tr> <td>4</td> <td>kw_ss_infert_th_spec_4</td> <td>in-vitro fertilization (fertilized in the laboratory)</td> </tr> <tr> <td>88</td> <td>kw_ss_infert_th_spec_88</td> <td>other</td> </tr> </table> | 1 | kw_ss_infert_th_spec_1  | lifestyle intervention (diet, exercise, etc.) | 2            | kw_ss_infert_th_spec__2 | medication (pills or injections for stimulation of egg maturation) | 3 | kw_ss_infert_th_spec_3  | surgery                                                    | 4            | kw_ss_infert_th_spec_4 | in-vitro fertilization (fertilized in the laboratory) | 88 | kw_ss_infert_th_spec_88 | other |
| 1   | kw_ss_infert_th_spec_1                                                                 | lifestyle intervention (diet, exercise, etc.)                                                                                                                                                                                  |                                                                                                                                                                                                                                                                                                                                                                                                                                                                                                                                                                      |   |                         |                                               |              |                         |                                                                    |   |                         |                                                            |              |                        |                                                       |    |                         |       |
| 2   | kw_ss_infert_th_spec__2                                                                | medication (pills or injections for stimulation of egg maturation)                                                                                                                                                             |                                                                                                                                                                                                                                                                                                                                                                                                                                                                                                                                                                      |   |                         |                                               |              |                         |                                                                    |   |                         |                                                            |              |                        |                                                       |    |                         |       |
| 3   | kw_ss_infert_th_spec_3                                                                 | surgery                                                                                                                                                                                                                        |                                                                                                                                                                                                                                                                                                                                                                                                                                                                                                                                                                      |   |                         |                                               |              |                         |                                                                    |   |                         |                                                            |              |                        |                                                       |    |                         |       |
| 4   | kw_ss_infert_th_spec_4                                                                 | in-vitro fertilization (fertilized in the laboratory)                                                                                                                                                                          |                                                                                                                                                                                                                                                                                                                                                                                                                                                                                                                                                                      |   |                         |                                               |              |                         |                                                                    |   |                         |                                                            |              |                        |                                                       |    |                         |       |
| 88  | kw_ss_infert_th_spec_88                                                                | other                                                                                                                                                                                                                          |                                                                                                                                                                                                                                                                                                                                                                                                                                                                                                                                                                      |   |                         |                                               |              |                         |                                                                    |   |                         |                                                            |              |                        |                                                       |    |                         |       |
| 292 | kw_ss_infert_th_spec_88<br>Show the field ONLY if:<br>[kw_ss_infert_th_spec(88)] = '1' | What other therapeutic options?<br><i>Please specify.</i>                                                                                                                                                                      | notes, Required                                                                                                                                                                                                                                                                                                                                                                                                                                                                                                                                                      |   |                         |                                               |              |                         |                                                                    |   |                         |                                                            |              |                        |                                                       |    |                         |       |

|     |                                                                                                                                                                                                                                                                                                                                                          |                                                                                                                             |                                                                                                                                                                                                                                                                                                                                                                                                                                                                                                                                                                                                                                                                                                                                                                                                                                                                                                                                                                                                                                                                                                                                                                                                   |   |                         |                                                                                     |    |                         |                                                             |   |                         |                                                                        |    |                          |                                                                                                   |    |                          |                                 |    |                          |                          |   |                         |                           |   |                         |                                                  |   |                         |                  |    |                          |                               |    |                          |       |
|-----|----------------------------------------------------------------------------------------------------------------------------------------------------------------------------------------------------------------------------------------------------------------------------------------------------------------------------------------------------------|-----------------------------------------------------------------------------------------------------------------------------|---------------------------------------------------------------------------------------------------------------------------------------------------------------------------------------------------------------------------------------------------------------------------------------------------------------------------------------------------------------------------------------------------------------------------------------------------------------------------------------------------------------------------------------------------------------------------------------------------------------------------------------------------------------------------------------------------------------------------------------------------------------------------------------------------------------------------------------------------------------------------------------------------------------------------------------------------------------------------------------------------------------------------------------------------------------------------------------------------------------------------------------------------------------------------------------------------|---|-------------------------|-------------------------------------------------------------------------------------|----|-------------------------|-------------------------------------------------------------|---|-------------------------|------------------------------------------------------------------------|----|--------------------------|---------------------------------------------------------------------------------------------------|----|--------------------------|---------------------------------|----|--------------------------|--------------------------|---|-------------------------|---------------------------|---|-------------------------|--------------------------------------------------|---|-------------------------|------------------|----|--------------------------|-------------------------------|----|--------------------------|-------|
| 293 | kw_ss_infert_th1_spec<br>Show the field ONLY if:<br>[kw_ss_infert_th_spec(1)] = '1'                                                                                                                                                                                                                                                                      | Which lifestyle interventions have you tried?                                                                               | checkbox, Required<br><table border="1" data-bbox="973 168 1444 716"> <tr> <td>1</td> <td>kw_ss_infert_th1_spec_1</td> <td>behavioural interventions (e.g. goal-setting, self-monitoring, slower eating, etc.)</td> </tr> <tr> <td>2</td> <td>kw_ss_infert_th1_spec_2</td> <td>attitude</td> </tr> <tr> <td>3</td> <td>kw_ss_infert_th1_spec_3</td> <td>dietary interventions (e.g. well-balanced, reduce energy intake, etc.)</td> </tr> <tr> <td>4</td> <td>kw_ss_infert_th1_spec_4</td> <td>physical activity</td> </tr> <tr> <td>5</td> <td>kw_ss_infert_th1_spec_5</td> <td>weight assessment and reduction</td> </tr> <tr> <td>6</td> <td>kw_ss_infert_th1_spec_6</td> <td>blood glucose regulation</td> </tr> <tr> <td>7</td> <td>kw_ss_infert_th1_spec_7</td> <td>blood pressure regulation</td> </tr> <tr> <td>8</td> <td>kw_ss_infert_th1_spec_8</td> <td>abstinence from smoking, alcohol and other drugs</td> </tr> <tr> <td>9</td> <td>kw_ss_infert_th1_spec_9</td> <td>sleep regulation</td> </tr> <tr> <td>10</td> <td>kw_ss_infert_th1_spec_10</td> <td>changes regarding sexual life</td> </tr> <tr> <td>88</td> <td>kw_ss_infert_th1_spec_88</td> <td>other</td> </tr> </table> | 1 | kw_ss_infert_th1_spec_1 | behavioural interventions (e.g. goal-setting, self-monitoring, slower eating, etc.) | 2  | kw_ss_infert_th1_spec_2 | attitude                                                    | 3 | kw_ss_infert_th1_spec_3 | dietary interventions (e.g. well-balanced, reduce energy intake, etc.) | 4  | kw_ss_infert_th1_spec_4  | physical activity                                                                                 | 5  | kw_ss_infert_th1_spec_5  | weight assessment and reduction | 6  | kw_ss_infert_th1_spec_6  | blood glucose regulation | 7 | kw_ss_infert_th1_spec_7 | blood pressure regulation | 8 | kw_ss_infert_th1_spec_8 | abstinence from smoking, alcohol and other drugs | 9 | kw_ss_infert_th1_spec_9 | sleep regulation | 10 | kw_ss_infert_th1_spec_10 | changes regarding sexual life | 88 | kw_ss_infert_th1_spec_88 | other |
| 1   | kw_ss_infert_th1_spec_1                                                                                                                                                                                                                                                                                                                                  | behavioural interventions (e.g. goal-setting, self-monitoring, slower eating, etc.)                                         |                                                                                                                                                                                                                                                                                                                                                                                                                                                                                                                                                                                                                                                                                                                                                                                                                                                                                                                                                                                                                                                                                                                                                                                                   |   |                         |                                                                                     |    |                         |                                                             |   |                         |                                                                        |    |                          |                                                                                                   |    |                          |                                 |    |                          |                          |   |                         |                           |   |                         |                                                  |   |                         |                  |    |                          |                               |    |                          |       |
| 2   | kw_ss_infert_th1_spec_2                                                                                                                                                                                                                                                                                                                                  | attitude                                                                                                                    |                                                                                                                                                                                                                                                                                                                                                                                                                                                                                                                                                                                                                                                                                                                                                                                                                                                                                                                                                                                                                                                                                                                                                                                                   |   |                         |                                                                                     |    |                         |                                                             |   |                         |                                                                        |    |                          |                                                                                                   |    |                          |                                 |    |                          |                          |   |                         |                           |   |                         |                                                  |   |                         |                  |    |                          |                               |    |                          |       |
| 3   | kw_ss_infert_th1_spec_3                                                                                                                                                                                                                                                                                                                                  | dietary interventions (e.g. well-balanced, reduce energy intake, etc.)                                                      |                                                                                                                                                                                                                                                                                                                                                                                                                                                                                                                                                                                                                                                                                                                                                                                                                                                                                                                                                                                                                                                                                                                                                                                                   |   |                         |                                                                                     |    |                         |                                                             |   |                         |                                                                        |    |                          |                                                                                                   |    |                          |                                 |    |                          |                          |   |                         |                           |   |                         |                                                  |   |                         |                  |    |                          |                               |    |                          |       |
| 4   | kw_ss_infert_th1_spec_4                                                                                                                                                                                                                                                                                                                                  | physical activity                                                                                                           |                                                                                                                                                                                                                                                                                                                                                                                                                                                                                                                                                                                                                                                                                                                                                                                                                                                                                                                                                                                                                                                                                                                                                                                                   |   |                         |                                                                                     |    |                         |                                                             |   |                         |                                                                        |    |                          |                                                                                                   |    |                          |                                 |    |                          |                          |   |                         |                           |   |                         |                                                  |   |                         |                  |    |                          |                               |    |                          |       |
| 5   | kw_ss_infert_th1_spec_5                                                                                                                                                                                                                                                                                                                                  | weight assessment and reduction                                                                                             |                                                                                                                                                                                                                                                                                                                                                                                                                                                                                                                                                                                                                                                                                                                                                                                                                                                                                                                                                                                                                                                                                                                                                                                                   |   |                         |                                                                                     |    |                         |                                                             |   |                         |                                                                        |    |                          |                                                                                                   |    |                          |                                 |    |                          |                          |   |                         |                           |   |                         |                                                  |   |                         |                  |    |                          |                               |    |                          |       |
| 6   | kw_ss_infert_th1_spec_6                                                                                                                                                                                                                                                                                                                                  | blood glucose regulation                                                                                                    |                                                                                                                                                                                                                                                                                                                                                                                                                                                                                                                                                                                                                                                                                                                                                                                                                                                                                                                                                                                                                                                                                                                                                                                                   |   |                         |                                                                                     |    |                         |                                                             |   |                         |                                                                        |    |                          |                                                                                                   |    |                          |                                 |    |                          |                          |   |                         |                           |   |                         |                                                  |   |                         |                  |    |                          |                               |    |                          |       |
| 7   | kw_ss_infert_th1_spec_7                                                                                                                                                                                                                                                                                                                                  | blood pressure regulation                                                                                                   |                                                                                                                                                                                                                                                                                                                                                                                                                                                                                                                                                                                                                                                                                                                                                                                                                                                                                                                                                                                                                                                                                                                                                                                                   |   |                         |                                                                                     |    |                         |                                                             |   |                         |                                                                        |    |                          |                                                                                                   |    |                          |                                 |    |                          |                          |   |                         |                           |   |                         |                                                  |   |                         |                  |    |                          |                               |    |                          |       |
| 8   | kw_ss_infert_th1_spec_8                                                                                                                                                                                                                                                                                                                                  | abstinence from smoking, alcohol and other drugs                                                                            |                                                                                                                                                                                                                                                                                                                                                                                                                                                                                                                                                                                                                                                                                                                                                                                                                                                                                                                                                                                                                                                                                                                                                                                                   |   |                         |                                                                                     |    |                         |                                                             |   |                         |                                                                        |    |                          |                                                                                                   |    |                          |                                 |    |                          |                          |   |                         |                           |   |                         |                                                  |   |                         |                  |    |                          |                               |    |                          |       |
| 9   | kw_ss_infert_th1_spec_9                                                                                                                                                                                                                                                                                                                                  | sleep regulation                                                                                                            |                                                                                                                                                                                                                                                                                                                                                                                                                                                                                                                                                                                                                                                                                                                                                                                                                                                                                                                                                                                                                                                                                                                                                                                                   |   |                         |                                                                                     |    |                         |                                                             |   |                         |                                                                        |    |                          |                                                                                                   |    |                          |                                 |    |                          |                          |   |                         |                           |   |                         |                                                  |   |                         |                  |    |                          |                               |    |                          |       |
| 10  | kw_ss_infert_th1_spec_10                                                                                                                                                                                                                                                                                                                                 | changes regarding sexual life                                                                                               |                                                                                                                                                                                                                                                                                                                                                                                                                                                                                                                                                                                                                                                                                                                                                                                                                                                                                                                                                                                                                                                                                                                                                                                                   |   |                         |                                                                                     |    |                         |                                                             |   |                         |                                                                        |    |                          |                                                                                                   |    |                          |                                 |    |                          |                          |   |                         |                           |   |                         |                                                  |   |                         |                  |    |                          |                               |    |                          |       |
| 88  | kw_ss_infert_th1_spec_88                                                                                                                                                                                                                                                                                                                                 | other                                                                                                                       |                                                                                                                                                                                                                                                                                                                                                                                                                                                                                                                                                                                                                                                                                                                                                                                                                                                                                                                                                                                                                                                                                                                                                                                                   |   |                         |                                                                                     |    |                         |                                                             |   |                         |                                                                        |    |                          |                                                                                                   |    |                          |                                 |    |                          |                          |   |                         |                           |   |                         |                                                  |   |                         |                  |    |                          |                               |    |                          |       |
| 294 | kw_ss_infert_th1_spec_88<br>Show the field ONLY if:<br>[kw_ss_infert_th1_spec(88)] = '1'                                                                                                                                                                                                                                                                 | What other lifestyle intervention?<br><i>Please specify.</i>                                                                | notes, Required                                                                                                                                                                                                                                                                                                                                                                                                                                                                                                                                                                                                                                                                                                                                                                                                                                                                                                                                                                                                                                                                                                                                                                                   |   |                         |                                                                                     |    |                         |                                                             |   |                         |                                                                        |    |                          |                                                                                                   |    |                          |                                 |    |                          |                          |   |                         |                           |   |                         |                                                  |   |                         |                  |    |                          |                               |    |                          |       |
| 295 | kw_ss_infert_th2_spec<br>Show the field ONLY if:<br>[kw_ss_infert_th_spec(2)] = '1'                                                                                                                                                                                                                                                                      | Please select the applicable medications:<br><i>If you do not remember what medications you received, select "Unknown".</i> | checkbox, Required<br><table border="1" data-bbox="973 817 1444 1153"> <tr> <td>1</td> <td>kw_ss_infert_th2_spec_1</td> <td>Letrozole (pills, ="Femara")</td> </tr> <tr> <td>2</td> <td>kw_ss_infert_th2_spec_2</td> <td>Clomiphene (pills, ="Serophene" oder "Clomid")</td> </tr> <tr> <td>3</td> <td>kw_ss_infert_th2_spec_3</td> <td>Metformin (pills)</td> </tr> <tr> <td>4</td> <td>kw_ss_infert_th2_spec_4</td> <td>Gonadotropines (injections, e.g. "Choriomon", "Menopur", "Merional", "Fostimon", "Gonal-F", etc.)</td> </tr> <tr> <td>88</td> <td>kw_ss_infert_th2_spec_88</td> <td>other</td> </tr> <tr> <td>99</td> <td>kw_ss_infert_th2_spec_99</td> <td>Unknown</td> </tr> </table> <p>Field Annotation: @NONEOFTHEABOVE=99</p>                                                                                                                                                                                                                                                                                                                                                                                                                                                     | 1 | kw_ss_infert_th2_spec_1 | Letrozole (pills, ="Femara")                                                        | 2  | kw_ss_infert_th2_spec_2 | Clomiphene (pills, ="Serophene" oder "Clomid")              | 3 | kw_ss_infert_th2_spec_3 | Metformin (pills)                                                      | 4  | kw_ss_infert_th2_spec_4  | Gonadotropines (injections, e.g. "Choriomon", "Menopur", "Merional", "Fostimon", "Gonal-F", etc.) | 88 | kw_ss_infert_th2_spec_88 | other                           | 99 | kw_ss_infert_th2_spec_99 | Unknown                  |   |                         |                           |   |                         |                                                  |   |                         |                  |    |                          |                               |    |                          |       |
| 1   | kw_ss_infert_th2_spec_1                                                                                                                                                                                                                                                                                                                                  | Letrozole (pills, ="Femara")                                                                                                |                                                                                                                                                                                                                                                                                                                                                                                                                                                                                                                                                                                                                                                                                                                                                                                                                                                                                                                                                                                                                                                                                                                                                                                                   |   |                         |                                                                                     |    |                         |                                                             |   |                         |                                                                        |    |                          |                                                                                                   |    |                          |                                 |    |                          |                          |   |                         |                           |   |                         |                                                  |   |                         |                  |    |                          |                               |    |                          |       |
| 2   | kw_ss_infert_th2_spec_2                                                                                                                                                                                                                                                                                                                                  | Clomiphene (pills, ="Serophene" oder "Clomid")                                                                              |                                                                                                                                                                                                                                                                                                                                                                                                                                                                                                                                                                                                                                                                                                                                                                                                                                                                                                                                                                                                                                                                                                                                                                                                   |   |                         |                                                                                     |    |                         |                                                             |   |                         |                                                                        |    |                          |                                                                                                   |    |                          |                                 |    |                          |                          |   |                         |                           |   |                         |                                                  |   |                         |                  |    |                          |                               |    |                          |       |
| 3   | kw_ss_infert_th2_spec_3                                                                                                                                                                                                                                                                                                                                  | Metformin (pills)                                                                                                           |                                                                                                                                                                                                                                                                                                                                                                                                                                                                                                                                                                                                                                                                                                                                                                                                                                                                                                                                                                                                                                                                                                                                                                                                   |   |                         |                                                                                     |    |                         |                                                             |   |                         |                                                                        |    |                          |                                                                                                   |    |                          |                                 |    |                          |                          |   |                         |                           |   |                         |                                                  |   |                         |                  |    |                          |                               |    |                          |       |
| 4   | kw_ss_infert_th2_spec_4                                                                                                                                                                                                                                                                                                                                  | Gonadotropines (injections, e.g. "Choriomon", "Menopur", "Merional", "Fostimon", "Gonal-F", etc.)                           |                                                                                                                                                                                                                                                                                                                                                                                                                                                                                                                                                                                                                                                                                                                                                                                                                                                                                                                                                                                                                                                                                                                                                                                                   |   |                         |                                                                                     |    |                         |                                                             |   |                         |                                                                        |    |                          |                                                                                                   |    |                          |                                 |    |                          |                          |   |                         |                           |   |                         |                                                  |   |                         |                  |    |                          |                               |    |                          |       |
| 88  | kw_ss_infert_th2_spec_88                                                                                                                                                                                                                                                                                                                                 | other                                                                                                                       |                                                                                                                                                                                                                                                                                                                                                                                                                                                                                                                                                                                                                                                                                                                                                                                                                                                                                                                                                                                                                                                                                                                                                                                                   |   |                         |                                                                                     |    |                         |                                                             |   |                         |                                                                        |    |                          |                                                                                                   |    |                          |                                 |    |                          |                          |   |                         |                           |   |                         |                                                  |   |                         |                  |    |                          |                               |    |                          |       |
| 99  | kw_ss_infert_th2_spec_99                                                                                                                                                                                                                                                                                                                                 | Unknown                                                                                                                     |                                                                                                                                                                                                                                                                                                                                                                                                                                                                                                                                                                                                                                                                                                                                                                                                                                                                                                                                                                                                                                                                                                                                                                                                   |   |                         |                                                                                     |    |                         |                                                             |   |                         |                                                                        |    |                          |                                                                                                   |    |                          |                                 |    |                          |                          |   |                         |                           |   |                         |                                                  |   |                         |                  |    |                          |                               |    |                          |       |
| 296 | kw_ss_infert_th2_spec_88<br>Show the field ONLY if:<br>[kw_ss_infert_th2_spec(88)] = '1'                                                                                                                                                                                                                                                                 | What other medication?<br><i>Please specify.</i>                                                                            | notes, Required                                                                                                                                                                                                                                                                                                                                                                                                                                                                                                                                                                                                                                                                                                                                                                                                                                                                                                                                                                                                                                                                                                                                                                                   |   |                         |                                                                                     |    |                         |                                                             |   |                         |                                                                        |    |                          |                                                                                                   |    |                          |                                 |    |                          |                          |   |                         |                           |   |                         |                                                  |   |                         |                  |    |                          |                               |    |                          |       |
| 297 | kw_ss_infert_th3_spec<br>Show the field ONLY if:<br>[kw_ss_infert_th_spec(3)] = '1'                                                                                                                                                                                                                                                                      | Which operations were performed?<br><i>If you do not remember what was operated, select "Unknown".</i>                      | checkbox, Required<br><table border="1" data-bbox="973 1288 1444 1534"> <tr> <td>1</td> <td>kw_ss_infert_th3_spec_1</td> <td>surgery on ovaries</td> </tr> <tr> <td>2</td> <td>kw_ss_infert_th3_spec_2</td> <td>tubal patency testing (=chromopertubation/blue dye testing)</td> </tr> <tr> <td>3</td> <td>kw_ss_infert_th3_spec_3</td> <td>bariatric surgery (e.g. gastric bypass)</td> </tr> <tr> <td>88</td> <td>kw_ss_infert_th3_spec_88</td> <td>other</td> </tr> <tr> <td>99</td> <td>kw_ss_infert_th3_spec_99</td> <td>Unknown</td> </tr> </table> <p>Field Annotation: @NONEOFTHEABOVE=99</p>                                                                                                                                                                                                                                                                                                                                                                                                                                                                                                                                                                                             | 1 | kw_ss_infert_th3_spec_1 | surgery on ovaries                                                                  | 2  | kw_ss_infert_th3_spec_2 | tubal patency testing (=chromopertubation/blue dye testing) | 3 | kw_ss_infert_th3_spec_3 | bariatric surgery (e.g. gastric bypass)                                | 88 | kw_ss_infert_th3_spec_88 | other                                                                                             | 99 | kw_ss_infert_th3_spec_99 | Unknown                         |    |                          |                          |   |                         |                           |   |                         |                                                  |   |                         |                  |    |                          |                               |    |                          |       |
| 1   | kw_ss_infert_th3_spec_1                                                                                                                                                                                                                                                                                                                                  | surgery on ovaries                                                                                                          |                                                                                                                                                                                                                                                                                                                                                                                                                                                                                                                                                                                                                                                                                                                                                                                                                                                                                                                                                                                                                                                                                                                                                                                                   |   |                         |                                                                                     |    |                         |                                                             |   |                         |                                                                        |    |                          |                                                                                                   |    |                          |                                 |    |                          |                          |   |                         |                           |   |                         |                                                  |   |                         |                  |    |                          |                               |    |                          |       |
| 2   | kw_ss_infert_th3_spec_2                                                                                                                                                                                                                                                                                                                                  | tubal patency testing (=chromopertubation/blue dye testing)                                                                 |                                                                                                                                                                                                                                                                                                                                                                                                                                                                                                                                                                                                                                                                                                                                                                                                                                                                                                                                                                                                                                                                                                                                                                                                   |   |                         |                                                                                     |    |                         |                                                             |   |                         |                                                                        |    |                          |                                                                                                   |    |                          |                                 |    |                          |                          |   |                         |                           |   |                         |                                                  |   |                         |                  |    |                          |                               |    |                          |       |
| 3   | kw_ss_infert_th3_spec_3                                                                                                                                                                                                                                                                                                                                  | bariatric surgery (e.g. gastric bypass)                                                                                     |                                                                                                                                                                                                                                                                                                                                                                                                                                                                                                                                                                                                                                                                                                                                                                                                                                                                                                                                                                                                                                                                                                                                                                                                   |   |                         |                                                                                     |    |                         |                                                             |   |                         |                                                                        |    |                          |                                                                                                   |    |                          |                                 |    |                          |                          |   |                         |                           |   |                         |                                                  |   |                         |                  |    |                          |                               |    |                          |       |
| 88  | kw_ss_infert_th3_spec_88                                                                                                                                                                                                                                                                                                                                 | other                                                                                                                       |                                                                                                                                                                                                                                                                                                                                                                                                                                                                                                                                                                                                                                                                                                                                                                                                                                                                                                                                                                                                                                                                                                                                                                                                   |   |                         |                                                                                     |    |                         |                                                             |   |                         |                                                                        |    |                          |                                                                                                   |    |                          |                                 |    |                          |                          |   |                         |                           |   |                         |                                                  |   |                         |                  |    |                          |                               |    |                          |       |
| 99  | kw_ss_infert_th3_spec_99                                                                                                                                                                                                                                                                                                                                 | Unknown                                                                                                                     |                                                                                                                                                                                                                                                                                                                                                                                                                                                                                                                                                                                                                                                                                                                                                                                                                                                                                                                                                                                                                                                                                                                                                                                                   |   |                         |                                                                                     |    |                         |                                                             |   |                         |                                                                        |    |                          |                                                                                                   |    |                          |                                 |    |                          |                          |   |                         |                           |   |                         |                                                  |   |                         |                  |    |                          |                               |    |                          |       |
| 298 | kw_ss_infert_th3_spec_88<br>Show the field ONLY if:<br>[kw_ss_infert_th3_spec(88)] = '1'                                                                                                                                                                                                                                                                 | What other operation?<br><i>Please specify.</i>                                                                             | notes, Required                                                                                                                                                                                                                                                                                                                                                                                                                                                                                                                                                                                                                                                                                                                                                                                                                                                                                                                                                                                                                                                                                                                                                                                   |   |                         |                                                                                     |    |                         |                                                             |   |                         |                                                                        |    |                          |                                                                                                   |    |                          |                                 |    |                          |                          |   |                         |                           |   |                         |                                                  |   |                         |                  |    |                          |                               |    |                          |       |
| 299 | kw_ss_infert_th_effect_ss_yn<br>Show the field ONLY if: [kw_ss_yn] = '1' and [kw_ss_infert_th_yn] = '1'                                                                                                                                                                                                                                                  | Did you become pregnant with the help of any of these therapies?                                                            | radio, Required<br><table border="1" data-bbox="973 1668 1204 1724"> <tr> <td>1</td> <td>Yes</td> </tr> <tr> <td>0</td> <td>No</td> </tr> </table>                                                                                                                                                                                                                                                                                                                                                                                                                                                                                                                                                                                                                                                                                                                                                                                                                                                                                                                                                                                                                                                | 1 | Yes                     | 0                                                                                   | No |                         |                                                             |   |                         |                                                                        |    |                          |                                                                                                   |    |                          |                                 |    |                          |                          |   |                         |                           |   |                         |                                                  |   |                         |                  |    |                          |                               |    |                          |       |
| 1   | Yes                                                                                                                                                                                                                                                                                                                                                      |                                                                                                                             |                                                                                                                                                                                                                                                                                                                                                                                                                                                                                                                                                                                                                                                                                                                                                                                                                                                                                                                                                                                                                                                                                                                                                                                                   |   |                         |                                                                                     |    |                         |                                                             |   |                         |                                                                        |    |                          |                                                                                                   |    |                          |                                 |    |                          |                          |   |                         |                           |   |                         |                                                  |   |                         |                  |    |                          |                               |    |                          |       |
| 0   | No                                                                                                                                                                                                                                                                                                                                                       |                                                                                                                             |                                                                                                                                                                                                                                                                                                                                                                                                                                                                                                                                                                                                                                                                                                                                                                                                                                                                                                                                                                                                                                                                                                                                                                                                   |   |                         |                                                                                     |    |                         |                                                             |   |                         |                                                                        |    |                          |                                                                                                   |    |                          |                                 |    |                          |                          |   |                         |                           |   |                         |                                                  |   |                         |                  |    |                          |                               |    |                          |       |
| 300 | kw_ss_infert_th_effect_kid_yn<br>Show the field ONLY if:<br>[kw_ss_infert_th_yn] = '1' and ([children_nr] = '1' or [children_nr] = '2' or [children_nr] = '3' or [children_nr] = '4' or [children_nr] = '5' or [children_nr] = '6' or [children_nr] = '7' or [children_nr] = '8' or [children_nr] = '9' or [children_nr] = '10' or [children_nr] = '11') | Do you have children conceived with the help of such therapy?                                                               | radio, Required<br><table border="1" data-bbox="973 1758 1204 1825"> <tr> <td>1</td> <td>Yes</td> </tr> <tr> <td>0</td> <td>No</td> </tr> </table>                                                                                                                                                                                                                                                                                                                                                                                                                                                                                                                                                                                                                                                                                                                                                                                                                                                                                                                                                                                                                                                | 1 | Yes                     | 0                                                                                   | No |                         |                                                             |   |                         |                                                                        |    |                          |                                                                                                   |    |                          |                                 |    |                          |                          |   |                         |                           |   |                         |                                                  |   |                         |                  |    |                          |                               |    |                          |       |
| 1   | Yes                                                                                                                                                                                                                                                                                                                                                      |                                                                                                                             |                                                                                                                                                                                                                                                                                                                                                                                                                                                                                                                                                                                                                                                                                                                                                                                                                                                                                                                                                                                                                                                                                                                                                                                                   |   |                         |                                                                                     |    |                         |                                                             |   |                         |                                                                        |    |                          |                                                                                                   |    |                          |                                 |    |                          |                          |   |                         |                           |   |                         |                                                  |   |                         |                  |    |                          |                               |    |                          |       |
| 0   | No                                                                                                                                                                                                                                                                                                                                                       |                                                                                                                             |                                                                                                                                                                                                                                                                                                                                                                                                                                                                                                                                                                                                                                                                                                                                                                                                                                                                                                                                                                                                                                                                                                                                                                                                   |   |                         |                                                                                     |    |                         |                                                             |   |                         |                                                                        |    |                          |                                                                                                   |    |                          |                                 |    |                          |                          |   |                         |                           |   |                         |                                                  |   |                         |                  |    |                          |                               |    |                          |       |



|     |                                                                                                                                                                                                                                                                                                                                                 |                                                                                                                                                |                                                                                                                                                                                                                                                                                                                                                                                                                                                                                                                                                                                                                                                                                                                                                                                                                                                                                                                                                                                                                                                                                                                                                                                                    |     |                             |                                                                                     |    |                             |                                                                    |   |                             |                                                                        |   |                             |                                                                                                   |    |                             |                                 |    |                             |                          |   |                             |                           |    |                             |                                                  |   |                             |                  |    |                              |                               |    |                              |       |
|-----|-------------------------------------------------------------------------------------------------------------------------------------------------------------------------------------------------------------------------------------------------------------------------------------------------------------------------------------------------|------------------------------------------------------------------------------------------------------------------------------------------------|----------------------------------------------------------------------------------------------------------------------------------------------------------------------------------------------------------------------------------------------------------------------------------------------------------------------------------------------------------------------------------------------------------------------------------------------------------------------------------------------------------------------------------------------------------------------------------------------------------------------------------------------------------------------------------------------------------------------------------------------------------------------------------------------------------------------------------------------------------------------------------------------------------------------------------------------------------------------------------------------------------------------------------------------------------------------------------------------------------------------------------------------------------------------------------------------------|-----|-----------------------------|-------------------------------------------------------------------------------------|----|-----------------------------|--------------------------------------------------------------------|---|-----------------------------|------------------------------------------------------------------------|---|-----------------------------|---------------------------------------------------------------------------------------------------|----|-----------------------------|---------------------------------|----|-----------------------------|--------------------------|---|-----------------------------|---------------------------|----|-----------------------------|--------------------------------------------------|---|-----------------------------|------------------|----|------------------------------|-------------------------------|----|------------------------------|-------|
| 301 | kw_ss_infert_th_effect_kid_nr<br>Show the field ONLY if:<br>[kw_ss_infert_th_effect_kid_yn] = '1'<br>and ((children_nr] = '2' or [children_nr] = '3' or [children_nr] = '4' or [children_nr] = '5' or [children_nr] = '6' or [children_nr] = '7' or [children_nr] = '8' or [children_nr] = '9' or [children_nr] = '10' or [children_nr] = '11') | How many of your children have been conceived with the help of such therapy?                                                                   | dropdown, Required<br><table border="1" data-bbox="973 179 1204 571"> <tr><td>100</td><td>Alle</td></tr> <tr><td>1</td><td>1</td></tr> <tr><td>2</td><td>2</td></tr> <tr><td>3</td><td>3</td></tr> <tr><td>4</td><td>4</td></tr> <tr><td>5</td><td>5</td></tr> <tr><td>6</td><td>6</td></tr> <tr><td>7</td><td>7</td></tr> <tr><td>8</td><td>8</td></tr> <tr><td>9</td><td>9</td></tr> <tr><td>10</td><td>10</td></tr> <tr><td>11</td><td>über 10</td></tr> </table>                                                                                                                                                                                                                                                                                                                                                                                                                                                                                                                                                                                                                                                                                                                               | 100 | Alle                        | 1                                                                                   | 1  | 2                           | 2                                                                  | 3 | 3                           | 4                                                                      | 4 | 5                           | 5                                                                                                 | 6  | 6                           | 7                               | 7  | 8                           | 8                        | 9 | 9                           | 10                        | 10 | 11                          | über 10                                          |   |                             |                  |    |                              |                               |    |                              |       |
| 100 | Alle                                                                                                                                                                                                                                                                                                                                            |                                                                                                                                                |                                                                                                                                                                                                                                                                                                                                                                                                                                                                                                                                                                                                                                                                                                                                                                                                                                                                                                                                                                                                                                                                                                                                                                                                    |     |                             |                                                                                     |    |                             |                                                                    |   |                             |                                                                        |   |                             |                                                                                                   |    |                             |                                 |    |                             |                          |   |                             |                           |    |                             |                                                  |   |                             |                  |    |                              |                               |    |                              |       |
| 1   | 1                                                                                                                                                                                                                                                                                                                                               |                                                                                                                                                |                                                                                                                                                                                                                                                                                                                                                                                                                                                                                                                                                                                                                                                                                                                                                                                                                                                                                                                                                                                                                                                                                                                                                                                                    |     |                             |                                                                                     |    |                             |                                                                    |   |                             |                                                                        |   |                             |                                                                                                   |    |                             |                                 |    |                             |                          |   |                             |                           |    |                             |                                                  |   |                             |                  |    |                              |                               |    |                              |       |
| 2   | 2                                                                                                                                                                                                                                                                                                                                               |                                                                                                                                                |                                                                                                                                                                                                                                                                                                                                                                                                                                                                                                                                                                                                                                                                                                                                                                                                                                                                                                                                                                                                                                                                                                                                                                                                    |     |                             |                                                                                     |    |                             |                                                                    |   |                             |                                                                        |   |                             |                                                                                                   |    |                             |                                 |    |                             |                          |   |                             |                           |    |                             |                                                  |   |                             |                  |    |                              |                               |    |                              |       |
| 3   | 3                                                                                                                                                                                                                                                                                                                                               |                                                                                                                                                |                                                                                                                                                                                                                                                                                                                                                                                                                                                                                                                                                                                                                                                                                                                                                                                                                                                                                                                                                                                                                                                                                                                                                                                                    |     |                             |                                                                                     |    |                             |                                                                    |   |                             |                                                                        |   |                             |                                                                                                   |    |                             |                                 |    |                             |                          |   |                             |                           |    |                             |                                                  |   |                             |                  |    |                              |                               |    |                              |       |
| 4   | 4                                                                                                                                                                                                                                                                                                                                               |                                                                                                                                                |                                                                                                                                                                                                                                                                                                                                                                                                                                                                                                                                                                                                                                                                                                                                                                                                                                                                                                                                                                                                                                                                                                                                                                                                    |     |                             |                                                                                     |    |                             |                                                                    |   |                             |                                                                        |   |                             |                                                                                                   |    |                             |                                 |    |                             |                          |   |                             |                           |    |                             |                                                  |   |                             |                  |    |                              |                               |    |                              |       |
| 5   | 5                                                                                                                                                                                                                                                                                                                                               |                                                                                                                                                |                                                                                                                                                                                                                                                                                                                                                                                                                                                                                                                                                                                                                                                                                                                                                                                                                                                                                                                                                                                                                                                                                                                                                                                                    |     |                             |                                                                                     |    |                             |                                                                    |   |                             |                                                                        |   |                             |                                                                                                   |    |                             |                                 |    |                             |                          |   |                             |                           |    |                             |                                                  |   |                             |                  |    |                              |                               |    |                              |       |
| 6   | 6                                                                                                                                                                                                                                                                                                                                               |                                                                                                                                                |                                                                                                                                                                                                                                                                                                                                                                                                                                                                                                                                                                                                                                                                                                                                                                                                                                                                                                                                                                                                                                                                                                                                                                                                    |     |                             |                                                                                     |    |                             |                                                                    |   |                             |                                                                        |   |                             |                                                                                                   |    |                             |                                 |    |                             |                          |   |                             |                           |    |                             |                                                  |   |                             |                  |    |                              |                               |    |                              |       |
| 7   | 7                                                                                                                                                                                                                                                                                                                                               |                                                                                                                                                |                                                                                                                                                                                                                                                                                                                                                                                                                                                                                                                                                                                                                                                                                                                                                                                                                                                                                                                                                                                                                                                                                                                                                                                                    |     |                             |                                                                                     |    |                             |                                                                    |   |                             |                                                                        |   |                             |                                                                                                   |    |                             |                                 |    |                             |                          |   |                             |                           |    |                             |                                                  |   |                             |                  |    |                              |                               |    |                              |       |
| 8   | 8                                                                                                                                                                                                                                                                                                                                               |                                                                                                                                                |                                                                                                                                                                                                                                                                                                                                                                                                                                                                                                                                                                                                                                                                                                                                                                                                                                                                                                                                                                                                                                                                                                                                                                                                    |     |                             |                                                                                     |    |                             |                                                                    |   |                             |                                                                        |   |                             |                                                                                                   |    |                             |                                 |    |                             |                          |   |                             |                           |    |                             |                                                  |   |                             |                  |    |                              |                               |    |                              |       |
| 9   | 9                                                                                                                                                                                                                                                                                                                                               |                                                                                                                                                |                                                                                                                                                                                                                                                                                                                                                                                                                                                                                                                                                                                                                                                                                                                                                                                                                                                                                                                                                                                                                                                                                                                                                                                                    |     |                             |                                                                                     |    |                             |                                                                    |   |                             |                                                                        |   |                             |                                                                                                   |    |                             |                                 |    |                             |                          |   |                             |                           |    |                             |                                                  |   |                             |                  |    |                              |                               |    |                              |       |
| 10  | 10                                                                                                                                                                                                                                                                                                                                              |                                                                                                                                                |                                                                                                                                                                                                                                                                                                                                                                                                                                                                                                                                                                                                                                                                                                                                                                                                                                                                                                                                                                                                                                                                                                                                                                                                    |     |                             |                                                                                     |    |                             |                                                                    |   |                             |                                                                        |   |                             |                                                                                                   |    |                             |                                 |    |                             |                          |   |                             |                           |    |                             |                                                  |   |                             |                  |    |                              |                               |    |                              |       |
| 11  | über 10                                                                                                                                                                                                                                                                                                                                         |                                                                                                                                                |                                                                                                                                                                                                                                                                                                                                                                                                                                                                                                                                                                                                                                                                                                                                                                                                                                                                                                                                                                                                                                                                                                                                                                                                    |     |                             |                                                                                     |    |                             |                                                                    |   |                             |                                                                        |   |                             |                                                                                                   |    |                             |                                 |    |                             |                          |   |                             |                           |    |                             |                                                  |   |                             |                  |    |                              |                               |    |                              |       |
| 302 | kw_ss_infert_th_act_yn<br>Show the field ONLY if:<br>[kw_ss_infert_th_yn] = '1'                                                                                                                                                                                                                                                                 | Are you currently implementing any of the therapy methods or do you already have any of them planned?                                          | radio, Required<br><table border="1" data-bbox="973 616 1204 672"> <tr><td>1</td><td>Yes</td></tr> <tr><td>0</td><td>No</td></tr> </table>                                                                                                                                                                                                                                                                                                                                                                                                                                                                                                                                                                                                                                                                                                                                                                                                                                                                                                                                                                                                                                                         | 1   | Yes                         | 0                                                                                   | No |                             |                                                                    |   |                             |                                                                        |   |                             |                                                                                                   |    |                             |                                 |    |                             |                          |   |                             |                           |    |                             |                                                  |   |                             |                  |    |                              |                               |    |                              |       |
| 1   | Yes                                                                                                                                                                                                                                                                                                                                             |                                                                                                                                                |                                                                                                                                                                                                                                                                                                                                                                                                                                                                                                                                                                                                                                                                                                                                                                                                                                                                                                                                                                                                                                                                                                                                                                                                    |     |                             |                                                                                     |    |                             |                                                                    |   |                             |                                                                        |   |                             |                                                                                                   |    |                             |                                 |    |                             |                          |   |                             |                           |    |                             |                                                  |   |                             |                  |    |                              |                               |    |                              |       |
| 0   | No                                                                                                                                                                                                                                                                                                                                              |                                                                                                                                                |                                                                                                                                                                                                                                                                                                                                                                                                                                                                                                                                                                                                                                                                                                                                                                                                                                                                                                                                                                                                                                                                                                                                                                                                    |     |                             |                                                                                     |    |                             |                                                                    |   |                             |                                                                        |   |                             |                                                                                                   |    |                             |                                 |    |                             |                          |   |                             |                           |    |                             |                                                  |   |                             |                  |    |                              |                               |    |                              |       |
| 303 | kw_ss_infert_th_act_spec<br>Show the field ONLY if:<br>[kw_ss_infert_th_act_yn] = '1'                                                                                                                                                                                                                                                           | Which of the therapy methods are you still currently implementing or do you have already planned?                                              | checkbox, Required<br><table border="1" data-bbox="973 716 1444 952"> <tr><td>1</td><td>kw_ss_infert_th_act_spec_1</td><td>lifestyle intervention (diet, exercise, etc.)</td></tr> <tr><td>2</td><td>kw_ss_infert_th_act_spec_2</td><td>medication (pills or injections for stimulation of egg maturation)</td></tr> <tr><td>3</td><td>kw_ss_infert_th_act_spec_3</td><td>surgery</td></tr> <tr><td>4</td><td>kw_ss_infert_th_act_spec_4</td><td>in-vitro fertilization (fertilized in the laboratory)</td></tr> <tr><td>88</td><td>kw_ss_infert_th_act_spec_88</td><td>other</td></tr> </table>                                                                                                                                                                                                                                                                                                                                                                                                                                                                                                                                                                                                   | 1   | kw_ss_infert_th_act_spec_1  | lifestyle intervention (diet, exercise, etc.)                                       | 2  | kw_ss_infert_th_act_spec_2  | medication (pills or injections for stimulation of egg maturation) | 3 | kw_ss_infert_th_act_spec_3  | surgery                                                                | 4 | kw_ss_infert_th_act_spec_4  | in-vitro fertilization (fertilized in the laboratory)                                             | 88 | kw_ss_infert_th_act_spec_88 | other                           |    |                             |                          |   |                             |                           |    |                             |                                                  |   |                             |                  |    |                              |                               |    |                              |       |
| 1   | kw_ss_infert_th_act_spec_1                                                                                                                                                                                                                                                                                                                      | lifestyle intervention (diet, exercise, etc.)                                                                                                  |                                                                                                                                                                                                                                                                                                                                                                                                                                                                                                                                                                                                                                                                                                                                                                                                                                                                                                                                                                                                                                                                                                                                                                                                    |     |                             |                                                                                     |    |                             |                                                                    |   |                             |                                                                        |   |                             |                                                                                                   |    |                             |                                 |    |                             |                          |   |                             |                           |    |                             |                                                  |   |                             |                  |    |                              |                               |    |                              |       |
| 2   | kw_ss_infert_th_act_spec_2                                                                                                                                                                                                                                                                                                                      | medication (pills or injections for stimulation of egg maturation)                                                                             |                                                                                                                                                                                                                                                                                                                                                                                                                                                                                                                                                                                                                                                                                                                                                                                                                                                                                                                                                                                                                                                                                                                                                                                                    |     |                             |                                                                                     |    |                             |                                                                    |   |                             |                                                                        |   |                             |                                                                                                   |    |                             |                                 |    |                             |                          |   |                             |                           |    |                             |                                                  |   |                             |                  |    |                              |                               |    |                              |       |
| 3   | kw_ss_infert_th_act_spec_3                                                                                                                                                                                                                                                                                                                      | surgery                                                                                                                                        |                                                                                                                                                                                                                                                                                                                                                                                                                                                                                                                                                                                                                                                                                                                                                                                                                                                                                                                                                                                                                                                                                                                                                                                                    |     |                             |                                                                                     |    |                             |                                                                    |   |                             |                                                                        |   |                             |                                                                                                   |    |                             |                                 |    |                             |                          |   |                             |                           |    |                             |                                                  |   |                             |                  |    |                              |                               |    |                              |       |
| 4   | kw_ss_infert_th_act_spec_4                                                                                                                                                                                                                                                                                                                      | in-vitro fertilization (fertilized in the laboratory)                                                                                          |                                                                                                                                                                                                                                                                                                                                                                                                                                                                                                                                                                                                                                                                                                                                                                                                                                                                                                                                                                                                                                                                                                                                                                                                    |     |                             |                                                                                     |    |                             |                                                                    |   |                             |                                                                        |   |                             |                                                                                                   |    |                             |                                 |    |                             |                          |   |                             |                           |    |                             |                                                  |   |                             |                  |    |                              |                               |    |                              |       |
| 88  | kw_ss_infert_th_act_spec_88                                                                                                                                                                                                                                                                                                                     | other                                                                                                                                          |                                                                                                                                                                                                                                                                                                                                                                                                                                                                                                                                                                                                                                                                                                                                                                                                                                                                                                                                                                                                                                                                                                                                                                                                    |     |                             |                                                                                     |    |                             |                                                                    |   |                             |                                                                        |   |                             |                                                                                                   |    |                             |                                 |    |                             |                          |   |                             |                           |    |                             |                                                  |   |                             |                  |    |                              |                               |    |                              |       |
| 304 | kw_ss_infert_th1_act_spec<br>Show the field ONLY if:<br>[kw_ss_infert_th_act_spec(1)] = '1'                                                                                                                                                                                                                                                     | Please select the lifestyle interventions you are still currently performing:                                                                  | checkbox, Required<br><table border="1" data-bbox="973 996 1444 1545"> <tr><td>1</td><td>kw_ss_infert_th1_act_spec_1</td><td>behavioural interventions (e.g. goal-setting, self-monitoring, slower eating, etc.)</td></tr> <tr><td>2</td><td>kw_ss_infert_th1_act_spec_2</td><td>attitude</td></tr> <tr><td>3</td><td>kw_ss_infert_th1_act_spec_3</td><td>dietary interventions (e.g. well-balanced, reduce energy intake, etc.)</td></tr> <tr><td>4</td><td>kw_ss_infert_th1_act_spec_4</td><td>physical activity</td></tr> <tr><td>5</td><td>kw_ss_infert_th1_act_spec_5</td><td>weight assessment and reduction</td></tr> <tr><td>6</td><td>kw_ss_infert_th1_act_spec_6</td><td>blood glucose regulation</td></tr> <tr><td>7</td><td>kw_ss_infert_th1_act_spec_7</td><td>blood pressure regulation</td></tr> <tr><td>8</td><td>kw_ss_infert_th1_act_spec_8</td><td>abstinence from smoking, alcohol and other drugs</td></tr> <tr><td>9</td><td>kw_ss_infert_th1_act_spec_9</td><td>sleep regulation</td></tr> <tr><td>10</td><td>kw_ss_infert_th1_act_spec_10</td><td>changes regarding sexual life</td></tr> <tr><td>88</td><td>kw_ss_infert_th1_act_spec_88</td><td>other</td></tr> </table> | 1   | kw_ss_infert_th1_act_spec_1 | behavioural interventions (e.g. goal-setting, self-monitoring, slower eating, etc.) | 2  | kw_ss_infert_th1_act_spec_2 | attitude                                                           | 3 | kw_ss_infert_th1_act_spec_3 | dietary interventions (e.g. well-balanced, reduce energy intake, etc.) | 4 | kw_ss_infert_th1_act_spec_4 | physical activity                                                                                 | 5  | kw_ss_infert_th1_act_spec_5 | weight assessment and reduction | 6  | kw_ss_infert_th1_act_spec_6 | blood glucose regulation | 7 | kw_ss_infert_th1_act_spec_7 | blood pressure regulation | 8  | kw_ss_infert_th1_act_spec_8 | abstinence from smoking, alcohol and other drugs | 9 | kw_ss_infert_th1_act_spec_9 | sleep regulation | 10 | kw_ss_infert_th1_act_spec_10 | changes regarding sexual life | 88 | kw_ss_infert_th1_act_spec_88 | other |
| 1   | kw_ss_infert_th1_act_spec_1                                                                                                                                                                                                                                                                                                                     | behavioural interventions (e.g. goal-setting, self-monitoring, slower eating, etc.)                                                            |                                                                                                                                                                                                                                                                                                                                                                                                                                                                                                                                                                                                                                                                                                                                                                                                                                                                                                                                                                                                                                                                                                                                                                                                    |     |                             |                                                                                     |    |                             |                                                                    |   |                             |                                                                        |   |                             |                                                                                                   |    |                             |                                 |    |                             |                          |   |                             |                           |    |                             |                                                  |   |                             |                  |    |                              |                               |    |                              |       |
| 2   | kw_ss_infert_th1_act_spec_2                                                                                                                                                                                                                                                                                                                     | attitude                                                                                                                                       |                                                                                                                                                                                                                                                                                                                                                                                                                                                                                                                                                                                                                                                                                                                                                                                                                                                                                                                                                                                                                                                                                                                                                                                                    |     |                             |                                                                                     |    |                             |                                                                    |   |                             |                                                                        |   |                             |                                                                                                   |    |                             |                                 |    |                             |                          |   |                             |                           |    |                             |                                                  |   |                             |                  |    |                              |                               |    |                              |       |
| 3   | kw_ss_infert_th1_act_spec_3                                                                                                                                                                                                                                                                                                                     | dietary interventions (e.g. well-balanced, reduce energy intake, etc.)                                                                         |                                                                                                                                                                                                                                                                                                                                                                                                                                                                                                                                                                                                                                                                                                                                                                                                                                                                                                                                                                                                                                                                                                                                                                                                    |     |                             |                                                                                     |    |                             |                                                                    |   |                             |                                                                        |   |                             |                                                                                                   |    |                             |                                 |    |                             |                          |   |                             |                           |    |                             |                                                  |   |                             |                  |    |                              |                               |    |                              |       |
| 4   | kw_ss_infert_th1_act_spec_4                                                                                                                                                                                                                                                                                                                     | physical activity                                                                                                                              |                                                                                                                                                                                                                                                                                                                                                                                                                                                                                                                                                                                                                                                                                                                                                                                                                                                                                                                                                                                                                                                                                                                                                                                                    |     |                             |                                                                                     |    |                             |                                                                    |   |                             |                                                                        |   |                             |                                                                                                   |    |                             |                                 |    |                             |                          |   |                             |                           |    |                             |                                                  |   |                             |                  |    |                              |                               |    |                              |       |
| 5   | kw_ss_infert_th1_act_spec_5                                                                                                                                                                                                                                                                                                                     | weight assessment and reduction                                                                                                                |                                                                                                                                                                                                                                                                                                                                                                                                                                                                                                                                                                                                                                                                                                                                                                                                                                                                                                                                                                                                                                                                                                                                                                                                    |     |                             |                                                                                     |    |                             |                                                                    |   |                             |                                                                        |   |                             |                                                                                                   |    |                             |                                 |    |                             |                          |   |                             |                           |    |                             |                                                  |   |                             |                  |    |                              |                               |    |                              |       |
| 6   | kw_ss_infert_th1_act_spec_6                                                                                                                                                                                                                                                                                                                     | blood glucose regulation                                                                                                                       |                                                                                                                                                                                                                                                                                                                                                                                                                                                                                                                                                                                                                                                                                                                                                                                                                                                                                                                                                                                                                                                                                                                                                                                                    |     |                             |                                                                                     |    |                             |                                                                    |   |                             |                                                                        |   |                             |                                                                                                   |    |                             |                                 |    |                             |                          |   |                             |                           |    |                             |                                                  |   |                             |                  |    |                              |                               |    |                              |       |
| 7   | kw_ss_infert_th1_act_spec_7                                                                                                                                                                                                                                                                                                                     | blood pressure regulation                                                                                                                      |                                                                                                                                                                                                                                                                                                                                                                                                                                                                                                                                                                                                                                                                                                                                                                                                                                                                                                                                                                                                                                                                                                                                                                                                    |     |                             |                                                                                     |    |                             |                                                                    |   |                             |                                                                        |   |                             |                                                                                                   |    |                             |                                 |    |                             |                          |   |                             |                           |    |                             |                                                  |   |                             |                  |    |                              |                               |    |                              |       |
| 8   | kw_ss_infert_th1_act_spec_8                                                                                                                                                                                                                                                                                                                     | abstinence from smoking, alcohol and other drugs                                                                                               |                                                                                                                                                                                                                                                                                                                                                                                                                                                                                                                                                                                                                                                                                                                                                                                                                                                                                                                                                                                                                                                                                                                                                                                                    |     |                             |                                                                                     |    |                             |                                                                    |   |                             |                                                                        |   |                             |                                                                                                   |    |                             |                                 |    |                             |                          |   |                             |                           |    |                             |                                                  |   |                             |                  |    |                              |                               |    |                              |       |
| 9   | kw_ss_infert_th1_act_spec_9                                                                                                                                                                                                                                                                                                                     | sleep regulation                                                                                                                               |                                                                                                                                                                                                                                                                                                                                                                                                                                                                                                                                                                                                                                                                                                                                                                                                                                                                                                                                                                                                                                                                                                                                                                                                    |     |                             |                                                                                     |    |                             |                                                                    |   |                             |                                                                        |   |                             |                                                                                                   |    |                             |                                 |    |                             |                          |   |                             |                           |    |                             |                                                  |   |                             |                  |    |                              |                               |    |                              |       |
| 10  | kw_ss_infert_th1_act_spec_10                                                                                                                                                                                                                                                                                                                    | changes regarding sexual life                                                                                                                  |                                                                                                                                                                                                                                                                                                                                                                                                                                                                                                                                                                                                                                                                                                                                                                                                                                                                                                                                                                                                                                                                                                                                                                                                    |     |                             |                                                                                     |    |                             |                                                                    |   |                             |                                                                        |   |                             |                                                                                                   |    |                             |                                 |    |                             |                          |   |                             |                           |    |                             |                                                  |   |                             |                  |    |                              |                               |    |                              |       |
| 88  | kw_ss_infert_th1_act_spec_88                                                                                                                                                                                                                                                                                                                    | other                                                                                                                                          |                                                                                                                                                                                                                                                                                                                                                                                                                                                                                                                                                                                                                                                                                                                                                                                                                                                                                                                                                                                                                                                                                                                                                                                                    |     |                             |                                                                                     |    |                             |                                                                    |   |                             |                                                                        |   |                             |                                                                                                   |    |                             |                                 |    |                             |                          |   |                             |                           |    |                             |                                                  |   |                             |                  |    |                              |                               |    |                              |       |
| 305 | kw_ss_infert_th2_act_spec<br>Show the field ONLY if:<br>[kw_ss_infert_th_act_spec(2)] = '1'                                                                                                                                                                                                                                                     | Please select the medication you are still currently taking::<br><i>If you do not remember what medications you receive, select "Unknown".</i> | checkbox, Required<br><table border="1" data-bbox="973 1579 1444 1904"> <tr><td>1</td><td>kw_ss_infert_th2_spec_c_1</td><td>Letrozole (pills, ="Femara")</td></tr> <tr><td>2</td><td>kw_ss_infert_th2_spec_c_2</td><td>Clomiphene (pills, ="Serophene" oder "Clomid")</td></tr> <tr><td>3</td><td>kw_ss_infert_th2_spec_c_3</td><td>Metformin (pills)</td></tr> <tr><td>4</td><td>kw_ss_infert_th2_spec_c_4</td><td>Gonadotropines (injections, e.g. "Choriomon", "Menopur", "Merional", "Fostimon", "Gonal-F", etc.)</td></tr> <tr><td>88</td><td>kw_ss_infert_th2_spec_c_88</td><td>other</td></tr> <tr><td>99</td><td>kw_ss_infert_th2_spec_c_99</td><td>Unknown</td></tr> </table> <p>Field Annotation: @NONEOFTHEABOVE=99</p>                                                                                                                                                                                                                                                                                                                                                                                                                                                                 | 1   | kw_ss_infert_th2_spec_c_1   | Letrozole (pills, ="Femara")                                                        | 2  | kw_ss_infert_th2_spec_c_2   | Clomiphene (pills, ="Serophene" oder "Clomid")                     | 3 | kw_ss_infert_th2_spec_c_3   | Metformin (pills)                                                      | 4 | kw_ss_infert_th2_spec_c_4   | Gonadotropines (injections, e.g. "Choriomon", "Menopur", "Merional", "Fostimon", "Gonal-F", etc.) | 88 | kw_ss_infert_th2_spec_c_88  | other                           | 99 | kw_ss_infert_th2_spec_c_99  | Unknown                  |   |                             |                           |    |                             |                                                  |   |                             |                  |    |                              |                               |    |                              |       |
| 1   | kw_ss_infert_th2_spec_c_1                                                                                                                                                                                                                                                                                                                       | Letrozole (pills, ="Femara")                                                                                                                   |                                                                                                                                                                                                                                                                                                                                                                                                                                                                                                                                                                                                                                                                                                                                                                                                                                                                                                                                                                                                                                                                                                                                                                                                    |     |                             |                                                                                     |    |                             |                                                                    |   |                             |                                                                        |   |                             |                                                                                                   |    |                             |                                 |    |                             |                          |   |                             |                           |    |                             |                                                  |   |                             |                  |    |                              |                               |    |                              |       |
| 2   | kw_ss_infert_th2_spec_c_2                                                                                                                                                                                                                                                                                                                       | Clomiphene (pills, ="Serophene" oder "Clomid")                                                                                                 |                                                                                                                                                                                                                                                                                                                                                                                                                                                                                                                                                                                                                                                                                                                                                                                                                                                                                                                                                                                                                                                                                                                                                                                                    |     |                             |                                                                                     |    |                             |                                                                    |   |                             |                                                                        |   |                             |                                                                                                   |    |                             |                                 |    |                             |                          |   |                             |                           |    |                             |                                                  |   |                             |                  |    |                              |                               |    |                              |       |
| 3   | kw_ss_infert_th2_spec_c_3                                                                                                                                                                                                                                                                                                                       | Metformin (pills)                                                                                                                              |                                                                                                                                                                                                                                                                                                                                                                                                                                                                                                                                                                                                                                                                                                                                                                                                                                                                                                                                                                                                                                                                                                                                                                                                    |     |                             |                                                                                     |    |                             |                                                                    |   |                             |                                                                        |   |                             |                                                                                                   |    |                             |                                 |    |                             |                          |   |                             |                           |    |                             |                                                  |   |                             |                  |    |                              |                               |    |                              |       |
| 4   | kw_ss_infert_th2_spec_c_4                                                                                                                                                                                                                                                                                                                       | Gonadotropines (injections, e.g. "Choriomon", "Menopur", "Merional", "Fostimon", "Gonal-F", etc.)                                              |                                                                                                                                                                                                                                                                                                                                                                                                                                                                                                                                                                                                                                                                                                                                                                                                                                                                                                                                                                                                                                                                                                                                                                                                    |     |                             |                                                                                     |    |                             |                                                                    |   |                             |                                                                        |   |                             |                                                                                                   |    |                             |                                 |    |                             |                          |   |                             |                           |    |                             |                                                  |   |                             |                  |    |                              |                               |    |                              |       |
| 88  | kw_ss_infert_th2_spec_c_88                                                                                                                                                                                                                                                                                                                      | other                                                                                                                                          |                                                                                                                                                                                                                                                                                                                                                                                                                                                                                                                                                                                                                                                                                                                                                                                                                                                                                                                                                                                                                                                                                                                                                                                                    |     |                             |                                                                                     |    |                             |                                                                    |   |                             |                                                                        |   |                             |                                                                                                   |    |                             |                                 |    |                             |                          |   |                             |                           |    |                             |                                                  |   |                             |                  |    |                              |                               |    |                              |       |
| 99  | kw_ss_infert_th2_spec_c_99                                                                                                                                                                                                                                                                                                                      | Unknown                                                                                                                                        |                                                                                                                                                                                                                                                                                                                                                                                                                                                                                                                                                                                                                                                                                                                                                                                                                                                                                                                                                                                                                                                                                                                                                                                                    |     |                             |                                                                                     |    |                             |                                                                    |   |                             |                                                                        |   |                             |                                                                                                   |    |                             |                                 |    |                             |                          |   |                             |                           |    |                             |                                                  |   |                             |                  |    |                              |                               |    |                              |       |
| 306 | kw_ss_infert_th3_act_spec<br>Show the field ONLY if:<br>[kw_ss_infert_th_act_spec(3)] = '1'                                                                                                                                                                                                                                                     | Please select the operations that are currently planned:<br><i>If you do not remember what will be operated, select "Unknown".</i>             | checkbox, Required<br><table border="1" data-bbox="973 1971 1444 2060"> <tr><td>1</td><td>kw_ss_infert_th3_spec_c_1</td><td>surgery on ovaries</td></tr> <tr><td>2</td><td>kw_ss_infert_th3_spec_c_2</td><td>tubal patency testing (=chromopertubation/blue dye testing)</td></tr> </table>                                                                                                                                                                                                                                                                                                                                                                                                                                                                                                                                                                                                                                                                                                                                                                                                                                                                                                        | 1   | kw_ss_infert_th3_spec_c_1   | surgery on ovaries                                                                  | 2  | kw_ss_infert_th3_spec_c_2   | tubal patency testing (=chromopertubation/blue dye testing)        |   |                             |                                                                        |   |                             |                                                                                                   |    |                             |                                 |    |                             |                          |   |                             |                           |    |                             |                                                  |   |                             |                  |    |                              |                               |    |                              |       |
| 1   | kw_ss_infert_th3_spec_c_1                                                                                                                                                                                                                                                                                                                       | surgery on ovaries                                                                                                                             |                                                                                                                                                                                                                                                                                                                                                                                                                                                                                                                                                                                                                                                                                                                                                                                                                                                                                                                                                                                                                                                                                                                                                                                                    |     |                             |                                                                                     |    |                             |                                                                    |   |                             |                                                                        |   |                             |                                                                                                   |    |                             |                                 |    |                             |                          |   |                             |                           |    |                             |                                                  |   |                             |                  |    |                              |                               |    |                              |       |
| 2   | kw_ss_infert_th3_spec_c_2                                                                                                                                                                                                                                                                                                                       | tubal patency testing (=chromopertubation/blue dye testing)                                                                                    |                                                                                                                                                                                                                                                                                                                                                                                                                                                                                                                                                                                                                                                                                                                                                                                                                                                                                                                                                                                                                                                                                                                                                                                                    |     |                             |                                                                                     |    |                             |                                                                    |   |                             |                                                                        |   |                             |                                                                                                   |    |                             |                                 |    |                             |                          |   |                             |                           |    |                             |                                                  |   |                             |                  |    |                              |                               |    |                              |       |

|     |                                                                                       |                                                                                                                                                                                                                                                  |                                                                                                                                                                                                                                                                                                                                                                                                                                                                                                                                                                                                          |   |                             |                                         |            |                              |                                               |    |                              |                                     |   |                  |                                                   |   |                 |                      |    |                  |       |
|-----|---------------------------------------------------------------------------------------|--------------------------------------------------------------------------------------------------------------------------------------------------------------------------------------------------------------------------------------------------|----------------------------------------------------------------------------------------------------------------------------------------------------------------------------------------------------------------------------------------------------------------------------------------------------------------------------------------------------------------------------------------------------------------------------------------------------------------------------------------------------------------------------------------------------------------------------------------------------------|---|-----------------------------|-----------------------------------------|------------|------------------------------|-----------------------------------------------|----|------------------------------|-------------------------------------|---|------------------|---------------------------------------------------|---|-----------------|----------------------|----|------------------|-------|
|     |                                                                                       |                                                                                                                                                                                                                                                  | <table border="1"> <tr> <td>3</td> <td>kw_ss_infert_th3_spe<br/>c_3</td> <td>bariatric surgery (e.g. gastric bypass)</td> </tr> <tr> <td>88</td> <td>kw_ss_infert_th3_spe<br/>c_88</td> <td>other</td> </tr> <tr> <td>99</td> <td>kw_ss_infert_th3_spe<br/>c_99</td> <td>Unknown</td> </tr> </table> <p>Field Annotation: @NONEOFTHEABOVE=99</p>                                                                                                                                                                                                                                                         | 3 | kw_ss_infert_th3_spe<br>c_3 | bariatric surgery (e.g. gastric bypass) | 88         | kw_ss_infert_th3_spe<br>c_88 | other                                         | 99 | kw_ss_infert_th3_spe<br>c_99 | Unknown                             |   |                  |                                                   |   |                 |                      |    |                  |       |
| 3   | kw_ss_infert_th3_spe<br>c_3                                                           | bariatric surgery (e.g. gastric bypass)                                                                                                                                                                                                          |                                                                                                                                                                                                                                                                                                                                                                                                                                                                                                                                                                                                          |   |                             |                                         |            |                              |                                               |    |                              |                                     |   |                  |                                                   |   |                 |                      |    |                  |       |
| 88  | kw_ss_infert_th3_spe<br>c_88                                                          | other                                                                                                                                                                                                                                            |                                                                                                                                                                                                                                                                                                                                                                                                                                                                                                                                                                                                          |   |                             |                                         |            |                              |                                               |    |                              |                                     |   |                  |                                                   |   |                 |                      |    |                  |       |
| 99  | kw_ss_infert_th3_spe<br>c_99                                                          | Unknown                                                                                                                                                                                                                                          |                                                                                                                                                                                                                                                                                                                                                                                                                                                                                                                                                                                                          |   |                             |                                         |            |                              |                                               |    |                              |                                     |   |                  |                                                   |   |                 |                      |    |                  |       |
| 307 | kw_ss_infert_th_adv_yn<br>Show the field ONLY if:<br>[kw_ss_infert_th_yn] = '1'       | Have you been consulted by your gynecologist regarding the therapy attempts?                                                                                                                                                                     | radio, Required<br><table border="1"> <tr> <td>1</td> <td>Yes</td> </tr> <tr> <td>0</td> <td>No</td> </tr> </table>                                                                                                                                                                                                                                                                                                                                                                                                                                                                                      | 1 | Yes                         | 0                                       | No         |                              |                                               |    |                              |                                     |   |                  |                                                   |   |                 |                      |    |                  |       |
| 1   | Yes                                                                                   |                                                                                                                                                                                                                                                  |                                                                                                                                                                                                                                                                                                                                                                                                                                                                                                                                                                                                          |   |                             |                                         |            |                              |                                               |    |                              |                                     |   |                  |                                                   |   |                 |                      |    |                  |       |
| 0   | No                                                                                    |                                                                                                                                                                                                                                                  |                                                                                                                                                                                                                                                                                                                                                                                                                                                                                                                                                                                                          |   |                             |                                         |            |                              |                                               |    |                              |                                     |   |                  |                                                   |   |                 |                      |    |                  |       |
| 308 | kw_ss_infert_th_adv_sc<br>Show the field ONLY if:<br>[kw_ss_infert_th_adv_yn] = '1'   | Please rate your satisfaction with consultation regarding therapy attempts.<br><i>Drag the blue slider and drop it at the desired position.</i>                                                                                                  | slider (number), Required<br>Slider labels: 0, 50, 100<br>Custom alignment: RH                                                                                                                                                                                                                                                                                                                                                                                                                                                                                                                           |   |                             |                                         |            |                              |                                               |    |                              |                                     |   |                  |                                                   |   |                 |                      |    |                  |       |
| 309 | kw_ss_infert_th_adv_wish<br>Show the field ONLY if:<br>[kw_ss_infert_th_adv_yn] = '0' | Would you have wished for a consultation by your gynecologist regarding therapy attempts?                                                                                                                                                        | radio, Required<br><table border="1"> <tr> <td>1</td> <td>Yes</td> </tr> <tr> <td>0</td> <td>No</td> </tr> </table>                                                                                                                                                                                                                                                                                                                                                                                                                                                                                      | 1 | Yes                         | 0                                       | No         |                              |                                               |    |                              |                                     |   |                  |                                                   |   |                 |                      |    |                  |       |
| 1   | Yes                                                                                   |                                                                                                                                                                                                                                                  |                                                                                                                                                                                                                                                                                                                                                                                                                                                                                                                                                                                                          |   |                             |                                         |            |                              |                                               |    |                              |                                     |   |                  |                                                   |   |                 |                      |    |                  |       |
| 0   | No                                                                                    |                                                                                                                                                                                                                                                  |                                                                                                                                                                                                                                                                                                                                                                                                                                                                                                                                                                                                          |   |                             |                                         |            |                              |                                               |    |                              |                                     |   |                  |                                                   |   |                 |                      |    |                  |       |
| 310 | kw_fertility_yn                                                                       | Section Header: <i>fertility feeling</i><br>Do you feel your fertility is disturbed or limited?                                                                                                                                                  | radio, Required<br><table border="1"> <tr> <td>1</td> <td>Yes</td> </tr> <tr> <td>0</td> <td>No</td> </tr> </table>                                                                                                                                                                                                                                                                                                                                                                                                                                                                                      | 1 | Yes                         | 0                                       | No         |                              |                                               |    |                              |                                     |   |                  |                                                   |   |                 |                      |    |                  |       |
| 1   | Yes                                                                                   |                                                                                                                                                                                                                                                  |                                                                                                                                                                                                                                                                                                                                                                                                                                                                                                                                                                                                          |   |                             |                                         |            |                              |                                               |    |                              |                                     |   |                  |                                                   |   |                 |                      |    |                  |       |
| 0   | No                                                                                    |                                                                                                                                                                                                                                                  |                                                                                                                                                                                                                                                                                                                                                                                                                                                                                                                                                                                                          |   |                             |                                         |            |                              |                                               |    |                              |                                     |   |                  |                                                   |   |                 |                      |    |                  |       |
| 311 | kw_fertility_adv_yn<br>Show the field ONLY if:<br>[kw_fertility_yn] = '1'             | Have you been consulted by your gynecologist regarding this feeling?                                                                                                                                                                             | radio, Required<br><table border="1"> <tr> <td>1</td> <td>Yes</td> </tr> <tr> <td>0</td> <td>No</td> </tr> </table>                                                                                                                                                                                                                                                                                                                                                                                                                                                                                      | 1 | Yes                         | 0                                       | No         |                              |                                               |    |                              |                                     |   |                  |                                                   |   |                 |                      |    |                  |       |
| 1   | Yes                                                                                   |                                                                                                                                                                                                                                                  |                                                                                                                                                                                                                                                                                                                                                                                                                                                                                                                                                                                                          |   |                             |                                         |            |                              |                                               |    |                              |                                     |   |                  |                                                   |   |                 |                      |    |                  |       |
| 0   | No                                                                                    |                                                                                                                                                                                                                                                  |                                                                                                                                                                                                                                                                                                                                                                                                                                                                                                                                                                                                          |   |                             |                                         |            |                              |                                               |    |                              |                                     |   |                  |                                                   |   |                 |                      |    |                  |       |
| 312 | kw_fertility_adv_sc<br>Show the field ONLY if:<br>[kw_fertility_adv_yn] = '1'         | Please rate your satisfaction with consultation regarding impaired fertility feeling.<br><i>Drag the blue slider and drop it at the desired position.</i>                                                                                        | slider (number), Required<br>Slider labels: 0, 50, 100<br>Custom alignment: RH                                                                                                                                                                                                                                                                                                                                                                                                                                                                                                                           |   |                             |                                         |            |                              |                                               |    |                              |                                     |   |                  |                                                   |   |                 |                      |    |                  |       |
| 313 | kw_fertility_adv_wish<br>Show the field ONLY if:<br>[kw_fertility_adv_yn] = '0'       | Would you have wished for a consultation by your gynecologist regarding this?                                                                                                                                                                    | radio, Required<br><table border="1"> <tr> <td>1</td> <td>Yes</td> </tr> <tr> <td>0</td> <td>No</td> </tr> </table>                                                                                                                                                                                                                                                                                                                                                                                                                                                                                      | 1 | Yes                         | 0                                       | No         |                              |                                               |    |                              |                                     |   |                  |                                                   |   |                 |                      |    |                  |       |
| 1   | Yes                                                                                   |                                                                                                                                                                                                                                                  |                                                                                                                                                                                                                                                                                                                                                                                                                                                                                                                                                                                                          |   |                             |                                         |            |                              |                                               |    |                              |                                     |   |                  |                                                   |   |                 |                      |    |                  |       |
| 0   | No                                                                                    |                                                                                                                                                                                                                                                  |                                                                                                                                                                                                                                                                                                                                                                                                                                                                                                                                                                                                          |   |                             |                                         |            |                              |                                               |    |                              |                                     |   |                  |                                                   |   |                 |                      |    |                  |       |
| 314 | kw_satisf_sc                                                                          | Section Header: <i>overall satisfaction fertility</i><br>Please rate your overall satisfaction with the medical care you receive from your gynecologist regarding fertility?<br><i>Drag the blue slider and drop it at the desired position.</i> | slider (number), Required<br>Slider labels: 0, 50, 100<br>Custom alignment: RH                                                                                                                                                                                                                                                                                                                                                                                                                                                                                                                           |   |                             |                                         |            |                              |                                               |    |                              |                                     |   |                  |                                                   |   |                 |                      |    |                  |       |
| 315 | kw_addit_yn                                                                           | Would you like additional consultation?                                                                                                                                                                                                          | radio, Required<br><table border="1"> <tr> <td>1</td> <td>Yes</td> </tr> <tr> <td>0</td> <td>No</td> </tr> </table>                                                                                                                                                                                                                                                                                                                                                                                                                                                                                      | 1 | Yes                         | 0                                       | No         |                              |                                               |    |                              |                                     |   |                  |                                                   |   |                 |                      |    |                  |       |
| 1   | Yes                                                                                   |                                                                                                                                                                                                                                                  |                                                                                                                                                                                                                                                                                                                                                                                                                                                                                                                                                                                                          |   |                             |                                         |            |                              |                                               |    |                              |                                     |   |                  |                                                   |   |                 |                      |    |                  |       |
| 0   | No                                                                                    |                                                                                                                                                                                                                                                  |                                                                                                                                                                                                                                                                                                                                                                                                                                                                                                                                                                                                          |   |                             |                                         |            |                              |                                               |    |                              |                                     |   |                  |                                                   |   |                 |                      |    |                  |       |
| 316 | kw_addit_spec<br>Show the field ONLY if:<br>[kw_addit_yn] = '1'                       | Please select what you would wish to have in addition:                                                                                                                                                                                           | checkbox, Required<br><table border="1"> <tr> <td>1</td> <td>kw_addit_spec__1</td> <td>More consultation and reassurance</td> </tr> <tr> <td>2</td> <td>kw_addit_spec__2</td> <td>More information providing (such as booklets)</td> </tr> <tr> <td>3</td> <td>kw_addit_spec__3</td> <td>More possibilities to ask questions</td> </tr> <tr> <td>4</td> <td>kw_addit_spec__4</td> <td>More examinations (blood tests, ultrasound, etc.)</td> </tr> <tr> <td>5</td> <td>kw_addit_spec_5</td> <td>More therapy options</td> </tr> <tr> <td>88</td> <td>kw_addit_spec_88</td> <td>Other</td> </tr> </table> | 1 | kw_addit_spec__1            | More consultation and reassurance       | 2          | kw_addit_spec__2             | More information providing (such as booklets) | 3  | kw_addit_spec__3             | More possibilities to ask questions | 4 | kw_addit_spec__4 | More examinations (blood tests, ultrasound, etc.) | 5 | kw_addit_spec_5 | More therapy options | 88 | kw_addit_spec_88 | Other |
| 1   | kw_addit_spec__1                                                                      | More consultation and reassurance                                                                                                                                                                                                                |                                                                                                                                                                                                                                                                                                                                                                                                                                                                                                                                                                                                          |   |                             |                                         |            |                              |                                               |    |                              |                                     |   |                  |                                                   |   |                 |                      |    |                  |       |
| 2   | kw_addit_spec__2                                                                      | More information providing (such as booklets)                                                                                                                                                                                                    |                                                                                                                                                                                                                                                                                                                                                                                                                                                                                                                                                                                                          |   |                             |                                         |            |                              |                                               |    |                              |                                     |   |                  |                                                   |   |                 |                      |    |                  |       |
| 3   | kw_addit_spec__3                                                                      | More possibilities to ask questions                                                                                                                                                                                                              |                                                                                                                                                                                                                                                                                                                                                                                                                                                                                                                                                                                                          |   |                             |                                         |            |                              |                                               |    |                              |                                     |   |                  |                                                   |   |                 |                      |    |                  |       |
| 4   | kw_addit_spec__4                                                                      | More examinations (blood tests, ultrasound, etc.)                                                                                                                                                                                                |                                                                                                                                                                                                                                                                                                                                                                                                                                                                                                                                                                                                          |   |                             |                                         |            |                              |                                               |    |                              |                                     |   |                  |                                                   |   |                 |                      |    |                  |       |
| 5   | kw_addit_spec_5                                                                       | More therapy options                                                                                                                                                                                                                             |                                                                                                                                                                                                                                                                                                                                                                                                                                                                                                                                                                                                          |   |                             |                                         |            |                              |                                               |    |                              |                                     |   |                  |                                                   |   |                 |                      |    |                  |       |
| 88  | kw_addit_spec_88                                                                      | Other                                                                                                                                                                                                                                            |                                                                                                                                                                                                                                                                                                                                                                                                                                                                                                                                                                                                          |   |                             |                                         |            |                              |                                               |    |                              |                                     |   |                  |                                                   |   |                 |                      |    |                  |       |
| 317 | kw_addit_spec_88<br>Show the field ONLY if:<br>[kw_addit_spec(88)] = '1'              | What other additional consultation?<br><i>Please specify.</i>                                                                                                                                                                                    | notes, Required                                                                                                                                                                                                                                                                                                                                                                                                                                                                                                                                                                                          |   |                             |                                         |            |                              |                                               |    |                              |                                     |   |                  |                                                   |   |                 |                      |    |                  |       |
| 318 | einflussbereich_4_kinderwunsch_complete                                               | Section Header: <i>Form Status</i><br>Complete?                                                                                                                                                                                                  | dropdown<br><table border="1"> <tr> <td>0</td> <td>Incomplete</td> </tr> <tr> <td>1</td> <td>Unverified</td> </tr> <tr> <td>2</td> <td>Complete</td> </tr> </table>                                                                                                                                                                                                                                                                                                                                                                                                                                      | 0 | Incomplete                  | 1                                       | Unverified | 2                            | Complete                                      |    |                              |                                     |   |                  |                                                   |   |                 |                      |    |                  |       |
| 0   | Incomplete                                                                            |                                                                                                                                                                                                                                                  |                                                                                                                                                                                                                                                                                                                                                                                                                                                                                                                                                                                                          |   |                             |                                         |            |                              |                                               |    |                              |                                     |   |                  |                                                   |   |                 |                      |    |                  |       |
| 1   | Unverified                                                                            |                                                                                                                                                                                                                                                  |                                                                                                                                                                                                                                                                                                                                                                                                                                                                                                                                                                                                          |   |                             |                                         |            |                              |                                               |    |                              |                                     |   |                  |                                                   |   |                 |                      |    |                  |       |
| 2   | Complete                                                                              |                                                                                                                                                                                                                                                  |                                                                                                                                                                                                                                                                                                                                                                                                                                                                                                                                                                                                          |   |                             |                                         |            |                              |                                               |    |                              |                                     |   |                  |                                                   |   |                 |                      |    |                  |       |

|     |                                                                                                       |                                                                                                                                                                             |                                                                                |
|-----|-------------------------------------------------------------------------------------------------------|-----------------------------------------------------------------------------------------------------------------------------------------------------------------------------|--------------------------------------------------------------------------------|
| 319 | psy_kb_sorg_yn                                                                                        | Section Header: <i>body image</i><br>Do you worry a lot about the way you look and wish you could think about it less?                                                      | radio, Required<br>1 Yes<br>0 No                                               |
| 320 | psy_kb_sorg_1h_yn                                                                                     | On a typical day, do you spend more than 1 hour per day worrying about your appearance?                                                                                     | radio, Required<br>1 Yes<br>0 No                                               |
| 321 | psy_kb_sorg_prob_yn<br>Show the field ONLY if:<br>[psy_kb_sorg_yn] = '1' or [psy_kb_sorg_1h_yn] = '1' | Are your worries making it hard to do your job or be with family and friends?                                                                                               | radio, Required<br>1 Yes<br>0 No                                               |
| 322 | psy_kb_fig<br>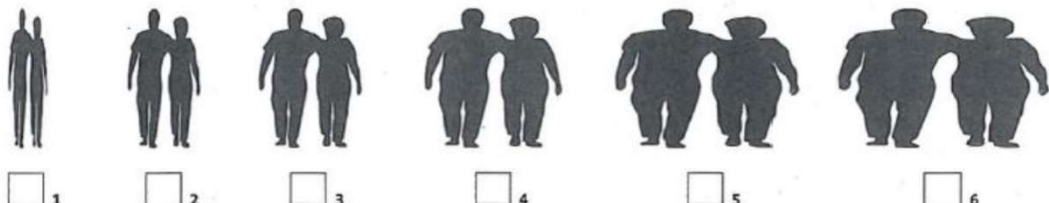      | Please look at the following figures and answer the following two questions about them:                                                                                     | descriptive                                                                    |
| 323 | psy_kb_fig_ist                                                                                        | Which of the pictures best shows how you see yourself?                                                                                                                      | dropdown, Required<br>1 1<br>2 2<br>3 3<br>4 4<br>5 5<br>6 6                   |
| 324 | psy_kb_fig_wish                                                                                       | Which of the pictures best shows how you would like to be?                                                                                                                  | dropdown, Required<br>1 1<br>2 2<br>3 3<br>4 4<br>5 5<br>6 6                   |
| 325 | psy_kb_adv_yn                                                                                         | Have you been consulted by your gynecologist regarding your body image?<br><i>Were you asked these or similar questions or was the topic of body image discussed?</i>       | radio, Required<br>1 Yes<br>0 No                                               |
| 326 | psy_kb_adv_sc<br>Show the field ONLY if:<br>[psy_kb_adv_yn] = '1'                                     | Please rate your satisfaction with consultation regarding body image.<br><i>Drag the blue slider and drop it at the desired position.</i>                                   | slider (number), Required<br>Slider labels: 0, 50, 100<br>Custom alignment: RH |
| 327 | psy_kb_adv_wish<br>Show the field ONLY if:<br>[psy_kb_adv_yn] = '0'                                   | Would you have wished for a consultation by your gynecologist regarding body image?                                                                                         | radio, Required<br>1 Yes<br>0 No                                               |
| 328 | psy_ess_gew_yn                                                                                        | Section Header: <i>Eating habits</i><br>Does your weight affect the way you feel about yourself?                                                                            | radio, Required<br>1 Yes<br>0 No                                               |
| 329 | psy_ess_satisf_yn                                                                                     | Are you satisfied with your eating patterns?                                                                                                                                | radio, Required<br>1 Yes<br>0 No                                               |
| 330 | psy_ess_adv_yn                                                                                        | Have you been consulted by your gynecologist regarding your eating habits?<br><i>Were you asked these or similar questions or was the topic of eating habits discussed?</i> | radio, Required<br>1 Yes<br>0 No                                               |
| 331 | psy_ess_adv_sc<br>Show the field ONLY if:<br>[psy_ess_adv_yn] = '1'                                   | Please rate your satisfaction with consultation regarding eating habits.<br><i>Drag the blue slider and drop it at the desired position.</i>                                | slider (number), Required<br>Slider labels: 0, 50, 100<br>Custom alignment: RH |
| 332 | psy_ess_adv_wish<br>Show the field ONLY if:<br>[psy_ess_adv_yn] = '0'                                 | Would you have wished for a consultation by your gynecologist regarding eating habits?                                                                                      | radio, Required<br>1 Yes<br>0 No                                               |
| 333 | psy_ad_info                                                                                           | Section Header: <i>depressive and anxiety symptoms</i><br>Over the last 2 weeks, how often have you been bothered by the following problems?                                | descriptive                                                                    |
| 334 | psy_ad_d1                                                                                             | feeling down, depressed, or hopeless?                                                                                                                                       | dropdown, Required                                                             |

|     |                                                                         |                                                                                                                                                                                                                                                                                                          |                                                                                                                                                                                                                                                                                                                                                                                                                                                                                                                                                                                       |   |                               |                                   |                                |                   |                                               |   |                    |                                     |       |                   |                                                   |   |                   |                      |    |                    |       |
|-----|-------------------------------------------------------------------------|----------------------------------------------------------------------------------------------------------------------------------------------------------------------------------------------------------------------------------------------------------------------------------------------------------|---------------------------------------------------------------------------------------------------------------------------------------------------------------------------------------------------------------------------------------------------------------------------------------------------------------------------------------------------------------------------------------------------------------------------------------------------------------------------------------------------------------------------------------------------------------------------------------|---|-------------------------------|-----------------------------------|--------------------------------|-------------------|-----------------------------------------------|---|--------------------|-------------------------------------|-------|-------------------|---------------------------------------------------|---|-------------------|----------------------|----|--------------------|-------|
|     |                                                                         |                                                                                                                                                                                                                                                                                                          | <table border="1"> <tr><td>5</td><td>Constantly (almost every day)</td></tr> <tr><td>4</td><td>Often (more than half of days)</td></tr> <tr><td>3</td><td>Sometimes (half of days)</td></tr> <tr><td>2</td><td>Rarely (some days)</td></tr> <tr><td>1</td><td>Never</td></tr> </table>                                                                                                                                                                                                                                                                                                | 5 | Constantly (almost every day) | 4                                 | Often (more than half of days) | 3                 | Sometimes (half of days)                      | 2 | Rarely (some days) | 1                                   | Never |                   |                                                   |   |                   |                      |    |                    |       |
| 5   | Constantly (almost every day)                                           |                                                                                                                                                                                                                                                                                                          |                                                                                                                                                                                                                                                                                                                                                                                                                                                                                                                                                                                       |   |                               |                                   |                                |                   |                                               |   |                    |                                     |       |                   |                                                   |   |                   |                      |    |                    |       |
| 4   | Often (more than half of days)                                          |                                                                                                                                                                                                                                                                                                          |                                                                                                                                                                                                                                                                                                                                                                                                                                                                                                                                                                                       |   |                               |                                   |                                |                   |                                               |   |                    |                                     |       |                   |                                                   |   |                   |                      |    |                    |       |
| 3   | Sometimes (half of days)                                                |                                                                                                                                                                                                                                                                                                          |                                                                                                                                                                                                                                                                                                                                                                                                                                                                                                                                                                                       |   |                               |                                   |                                |                   |                                               |   |                    |                                     |       |                   |                                                   |   |                   |                      |    |                    |       |
| 2   | Rarely (some days)                                                      |                                                                                                                                                                                                                                                                                                          |                                                                                                                                                                                                                                                                                                                                                                                                                                                                                                                                                                                       |   |                               |                                   |                                |                   |                                               |   |                    |                                     |       |                   |                                                   |   |                   |                      |    |                    |       |
| 1   | Never                                                                   |                                                                                                                                                                                                                                                                                                          |                                                                                                                                                                                                                                                                                                                                                                                                                                                                                                                                                                                       |   |                               |                                   |                                |                   |                                               |   |                    |                                     |       |                   |                                                   |   |                   |                      |    |                    |       |
| 335 | psy_ad_d2                                                               | little interest or pleasure in doing things?                                                                                                                                                                                                                                                             | dropdown, Required <table border="1"> <tr><td>5</td><td>Constantly (almost every day)</td></tr> <tr><td>4</td><td>Often (more than half of days)</td></tr> <tr><td>3</td><td>Sometimes (half of days)</td></tr> <tr><td>2</td><td>Rarely (some days)</td></tr> <tr><td>1</td><td>Never</td></tr> </table>                                                                                                                                                                                                                                                                             | 5 | Constantly (almost every day) | 4                                 | Often (more than half of days) | 3                 | Sometimes (half of days)                      | 2 | Rarely (some days) | 1                                   | Never |                   |                                                   |   |                   |                      |    |                    |       |
| 5   | Constantly (almost every day)                                           |                                                                                                                                                                                                                                                                                                          |                                                                                                                                                                                                                                                                                                                                                                                                                                                                                                                                                                                       |   |                               |                                   |                                |                   |                                               |   |                    |                                     |       |                   |                                                   |   |                   |                      |    |                    |       |
| 4   | Often (more than half of days)                                          |                                                                                                                                                                                                                                                                                                          |                                                                                                                                                                                                                                                                                                                                                                                                                                                                                                                                                                                       |   |                               |                                   |                                |                   |                                               |   |                    |                                     |       |                   |                                                   |   |                   |                      |    |                    |       |
| 3   | Sometimes (half of days)                                                |                                                                                                                                                                                                                                                                                                          |                                                                                                                                                                                                                                                                                                                                                                                                                                                                                                                                                                                       |   |                               |                                   |                                |                   |                                               |   |                    |                                     |       |                   |                                                   |   |                   |                      |    |                    |       |
| 2   | Rarely (some days)                                                      |                                                                                                                                                                                                                                                                                                          |                                                                                                                                                                                                                                                                                                                                                                                                                                                                                                                                                                                       |   |                               |                                   |                                |                   |                                               |   |                    |                                     |       |                   |                                                   |   |                   |                      |    |                    |       |
| 1   | Never                                                                   |                                                                                                                                                                                                                                                                                                          |                                                                                                                                                                                                                                                                                                                                                                                                                                                                                                                                                                                       |   |                               |                                   |                                |                   |                                               |   |                    |                                     |       |                   |                                                   |   |                   |                      |    |                    |       |
| 336 | psy_ad_a1                                                               | feeling nervous, anxious or on edge?                                                                                                                                                                                                                                                                     | dropdown, Required <table border="1"> <tr><td>5</td><td>Constantly (almost every day)</td></tr> <tr><td>4</td><td>Often (more than half of days)</td></tr> <tr><td>3</td><td>Sometimes (half of days)</td></tr> <tr><td>2</td><td>Rarely (some days)</td></tr> <tr><td>1</td><td>Never</td></tr> </table>                                                                                                                                                                                                                                                                             | 5 | Constantly (almost every day) | 4                                 | Often (more than half of days) | 3                 | Sometimes (half of days)                      | 2 | Rarely (some days) | 1                                   | Never |                   |                                                   |   |                   |                      |    |                    |       |
| 5   | Constantly (almost every day)                                           |                                                                                                                                                                                                                                                                                                          |                                                                                                                                                                                                                                                                                                                                                                                                                                                                                                                                                                                       |   |                               |                                   |                                |                   |                                               |   |                    |                                     |       |                   |                                                   |   |                   |                      |    |                    |       |
| 4   | Often (more than half of days)                                          |                                                                                                                                                                                                                                                                                                          |                                                                                                                                                                                                                                                                                                                                                                                                                                                                                                                                                                                       |   |                               |                                   |                                |                   |                                               |   |                    |                                     |       |                   |                                                   |   |                   |                      |    |                    |       |
| 3   | Sometimes (half of days)                                                |                                                                                                                                                                                                                                                                                                          |                                                                                                                                                                                                                                                                                                                                                                                                                                                                                                                                                                                       |   |                               |                                   |                                |                   |                                               |   |                    |                                     |       |                   |                                                   |   |                   |                      |    |                    |       |
| 2   | Rarely (some days)                                                      |                                                                                                                                                                                                                                                                                                          |                                                                                                                                                                                                                                                                                                                                                                                                                                                                                                                                                                                       |   |                               |                                   |                                |                   |                                               |   |                    |                                     |       |                   |                                                   |   |                   |                      |    |                    |       |
| 1   | Never                                                                   |                                                                                                                                                                                                                                                                                                          |                                                                                                                                                                                                                                                                                                                                                                                                                                                                                                                                                                                       |   |                               |                                   |                                |                   |                                               |   |                    |                                     |       |                   |                                                   |   |                   |                      |    |                    |       |
| 337 | psy_ad_a2                                                               | not being able to stop or control worrying?                                                                                                                                                                                                                                                              | dropdown, Required <table border="1"> <tr><td>5</td><td>Constantly (almost every day)</td></tr> <tr><td>4</td><td>Often (more than half of days)</td></tr> <tr><td>3</td><td>Sometimes (half of days)</td></tr> <tr><td>2</td><td>Rarely (some days)</td></tr> <tr><td>1</td><td>Never</td></tr> </table>                                                                                                                                                                                                                                                                             | 5 | Constantly (almost every day) | 4                                 | Often (more than half of days) | 3                 | Sometimes (half of days)                      | 2 | Rarely (some days) | 1                                   | Never |                   |                                                   |   |                   |                      |    |                    |       |
| 5   | Constantly (almost every day)                                           |                                                                                                                                                                                                                                                                                                          |                                                                                                                                                                                                                                                                                                                                                                                                                                                                                                                                                                                       |   |                               |                                   |                                |                   |                                               |   |                    |                                     |       |                   |                                                   |   |                   |                      |    |                    |       |
| 4   | Often (more than half of days)                                          |                                                                                                                                                                                                                                                                                                          |                                                                                                                                                                                                                                                                                                                                                                                                                                                                                                                                                                                       |   |                               |                                   |                                |                   |                                               |   |                    |                                     |       |                   |                                                   |   |                   |                      |    |                    |       |
| 3   | Sometimes (half of days)                                                |                                                                                                                                                                                                                                                                                                          |                                                                                                                                                                                                                                                                                                                                                                                                                                                                                                                                                                                       |   |                               |                                   |                                |                   |                                               |   |                    |                                     |       |                   |                                                   |   |                   |                      |    |                    |       |
| 2   | Rarely (some days)                                                      |                                                                                                                                                                                                                                                                                                          |                                                                                                                                                                                                                                                                                                                                                                                                                                                                                                                                                                                       |   |                               |                                   |                                |                   |                                               |   |                    |                                     |       |                   |                                                   |   |                   |                      |    |                    |       |
| 1   | Never                                                                   |                                                                                                                                                                                                                                                                                                          |                                                                                                                                                                                                                                                                                                                                                                                                                                                                                                                                                                                       |   |                               |                                   |                                |                   |                                               |   |                    |                                     |       |                   |                                                   |   |                   |                      |    |                    |       |
| 338 | psy_ad_adv_yn                                                           | Have you been consulted by your gynecologist regarding such feelings?                                                                                                                                                                                                                                    | radio, Required <table border="1"> <tr><td>1</td><td>Yes</td></tr> <tr><td>0</td><td>No</td></tr> </table>                                                                                                                                                                                                                                                                                                                                                                                                                                                                            | 1 | Yes                           | 0                                 | No                             |                   |                                               |   |                    |                                     |       |                   |                                                   |   |                   |                      |    |                    |       |
| 1   | Yes                                                                     |                                                                                                                                                                                                                                                                                                          |                                                                                                                                                                                                                                                                                                                                                                                                                                                                                                                                                                                       |   |                               |                                   |                                |                   |                                               |   |                    |                                     |       |                   |                                                   |   |                   |                      |    |                    |       |
| 0   | No                                                                      |                                                                                                                                                                                                                                                                                                          |                                                                                                                                                                                                                                                                                                                                                                                                                                                                                                                                                                                       |   |                               |                                   |                                |                   |                                               |   |                    |                                     |       |                   |                                                   |   |                   |                      |    |                    |       |
| 339 | psy_ad_adv_sc<br>Show the field ONLY if: [psy_ad_adv_yn] = '1'          | Please rate your satisfaction with consultation regarding such feelings.<br><i>Drag the blue slider and drop it at the desired position.</i>                                                                                                                                                             | slider (number), Required<br>Slider labels: 0, 50, 100<br>Custom alignment: RH                                                                                                                                                                                                                                                                                                                                                                                                                                                                                                        |   |                               |                                   |                                |                   |                                               |   |                    |                                     |       |                   |                                                   |   |                   |                      |    |                    |       |
| 340 | psy_ad_adv_wish<br>Show the field ONLY if: [psy_ad_adv_yn] = '0'        | Would you have wished for a consultation by your gynecologist regarding such feelings?                                                                                                                                                                                                                   | radio, Required <table border="1"> <tr><td>1</td><td>Yes</td></tr> <tr><td>0</td><td>No</td></tr> </table>                                                                                                                                                                                                                                                                                                                                                                                                                                                                            | 1 | Yes                           | 0                                 | No                             |                   |                                               |   |                    |                                     |       |                   |                                                   |   |                   |                      |    |                    |       |
| 1   | Yes                                                                     |                                                                                                                                                                                                                                                                                                          |                                                                                                                                                                                                                                                                                                                                                                                                                                                                                                                                                                                       |   |                               |                                   |                                |                   |                                               |   |                    |                                     |       |                   |                                                   |   |                   |                      |    |                    |       |
| 0   | No                                                                      |                                                                                                                                                                                                                                                                                                          |                                                                                                                                                                                                                                                                                                                                                                                                                                                                                                                                                                                       |   |                               |                                   |                                |                   |                                               |   |                    |                                     |       |                   |                                                   |   |                   |                      |    |                    |       |
| 341 | psy_satisf_sc                                                           | Section Header: <i>overall satisfaction mental health and emotional wellbeing</i><br>Please rate your overall satisfaction with the medical care you receive from your gynecologist regarding mental health and emotional wellbeing?<br><i>Drag the blue slider and drop it at the desired position.</i> | slider (number), Required<br>Slider labels: 0, 50, 100<br>Custom alignment: RH                                                                                                                                                                                                                                                                                                                                                                                                                                                                                                        |   |                               |                                   |                                |                   |                                               |   |                    |                                     |       |                   |                                                   |   |                   |                      |    |                    |       |
| 342 | psy_addit_yn                                                            | Would you like additional consultation?                                                                                                                                                                                                                                                                  | radio, Required <table border="1"> <tr><td>1</td><td>Yes</td></tr> <tr><td>0</td><td>No</td></tr> </table>                                                                                                                                                                                                                                                                                                                                                                                                                                                                            | 1 | Yes                           | 0                                 | No                             |                   |                                               |   |                    |                                     |       |                   |                                                   |   |                   |                      |    |                    |       |
| 1   | Yes                                                                     |                                                                                                                                                                                                                                                                                                          |                                                                                                                                                                                                                                                                                                                                                                                                                                                                                                                                                                                       |   |                               |                                   |                                |                   |                                               |   |                    |                                     |       |                   |                                                   |   |                   |                      |    |                    |       |
| 0   | No                                                                      |                                                                                                                                                                                                                                                                                                          |                                                                                                                                                                                                                                                                                                                                                                                                                                                                                                                                                                                       |   |                               |                                   |                                |                   |                                               |   |                    |                                     |       |                   |                                                   |   |                   |                      |    |                    |       |
| 343 | psy_addit_spec<br>Show the field ONLY if: [psy_addit_yn]='1'            | Please select what you would wish to have in addition:                                                                                                                                                                                                                                                   | checkbox, Required <table border="1"> <tr><td>1</td><td>psy_addit_spec__1</td><td>More consultation and reassurance</td></tr> <tr><td>2</td><td>psy_addit_spec__2</td><td>More information providing (such as booklets)</td></tr> <tr><td>3</td><td>psy_addit_spec__3</td><td>More possibilities to ask questions</td></tr> <tr><td>4</td><td>psy_addit_spec__4</td><td>More examinations (blood tests, ultrasound, etc.)</td></tr> <tr><td>5</td><td>psy_addit_spec__5</td><td>More therapy options</td></tr> <tr><td>88</td><td>psy_addit_spec__88</td><td>Other</td></tr> </table> | 1 | psy_addit_spec__1             | More consultation and reassurance | 2                              | psy_addit_spec__2 | More information providing (such as booklets) | 3 | psy_addit_spec__3  | More possibilities to ask questions | 4     | psy_addit_spec__4 | More examinations (blood tests, ultrasound, etc.) | 5 | psy_addit_spec__5 | More therapy options | 88 | psy_addit_spec__88 | Other |
| 1   | psy_addit_spec__1                                                       | More consultation and reassurance                                                                                                                                                                                                                                                                        |                                                                                                                                                                                                                                                                                                                                                                                                                                                                                                                                                                                       |   |                               |                                   |                                |                   |                                               |   |                    |                                     |       |                   |                                                   |   |                   |                      |    |                    |       |
| 2   | psy_addit_spec__2                                                       | More information providing (such as booklets)                                                                                                                                                                                                                                                            |                                                                                                                                                                                                                                                                                                                                                                                                                                                                                                                                                                                       |   |                               |                                   |                                |                   |                                               |   |                    |                                     |       |                   |                                                   |   |                   |                      |    |                    |       |
| 3   | psy_addit_spec__3                                                       | More possibilities to ask questions                                                                                                                                                                                                                                                                      |                                                                                                                                                                                                                                                                                                                                                                                                                                                                                                                                                                                       |   |                               |                                   |                                |                   |                                               |   |                    |                                     |       |                   |                                                   |   |                   |                      |    |                    |       |
| 4   | psy_addit_spec__4                                                       | More examinations (blood tests, ultrasound, etc.)                                                                                                                                                                                                                                                        |                                                                                                                                                                                                                                                                                                                                                                                                                                                                                                                                                                                       |   |                               |                                   |                                |                   |                                               |   |                    |                                     |       |                   |                                                   |   |                   |                      |    |                    |       |
| 5   | psy_addit_spec__5                                                       | More therapy options                                                                                                                                                                                                                                                                                     |                                                                                                                                                                                                                                                                                                                                                                                                                                                                                                                                                                                       |   |                               |                                   |                                |                   |                                               |   |                    |                                     |       |                   |                                                   |   |                   |                      |    |                    |       |
| 88  | psy_addit_spec__88                                                      | Other                                                                                                                                                                                                                                                                                                    |                                                                                                                                                                                                                                                                                                                                                                                                                                                                                                                                                                                       |   |                               |                                   |                                |                   |                                               |   |                    |                                     |       |                   |                                                   |   |                   |                      |    |                    |       |
| 344 | psy_addit_spec_88<br>Show the field ONLY if: [psy_addit_spec(88)] = '1' | What other additional consultation?<br><i>Please specify .</i>                                                                                                                                                                                                                                           | notes                                                                                                                                                                                                                                                                                                                                                                                                                                                                                                                                                                                 |   |                               |                                   |                                |                   |                                               |   |                    |                                     |       |                   |                                                   |   |                   |                      |    |                    |       |
| 345 | einflussbereich_5_psyche_emoti<br>on_complete                           | Section Header: <i>Form Status</i><br>Complete?                                                                                                                                                                                                                                                          | dropdown <table border="1"> <tr><td>0</td><td>Incomplete</td></tr> <tr><td>1</td><td>Unverified</td></tr> <tr><td>2</td><td>Complete</td></tr> </table>                                                                                                                                                                                                                                                                                                                                                                                                                               | 0 | Incomplete                    | 1                                 | Unverified                     | 2                 | Complete                                      |   |                    |                                     |       |                   |                                                   |   |                   |                      |    |                    |       |
| 0   | Incomplete                                                              |                                                                                                                                                                                                                                                                                                          |                                                                                                                                                                                                                                                                                                                                                                                                                                                                                                                                                                                       |   |                               |                                   |                                |                   |                                               |   |                    |                                     |       |                   |                                                   |   |                   |                      |    |                    |       |
| 1   | Unverified                                                              |                                                                                                                                                                                                                                                                                                          |                                                                                                                                                                                                                                                                                                                                                                                                                                                                                                                                                                                       |   |                               |                                   |                                |                   |                                               |   |                    |                                     |       |                   |                                                   |   |                   |                      |    |                    |       |
| 2   | Complete                                                                |                                                                                                                                                                                                                                                                                                          |                                                                                                                                                                                                                                                                                                                                                                                                                                                                                                                                                                                       |   |                               |                                   |                                |                   |                                               |   |                    |                                     |       |                   |                                                   |   |                   |                      |    |                    |       |

|     |                                                                                                               |                                                                                                                                                                                                                                                                         |                                                                                                                                                                                                                                                                                                                                                                                                                                                                                                                                                                                                                                                                                                                       |   |                  |                                                                                                                |    |                  |                                                                        |   |                  |                                                              |   |                  |                                                   |    |                   |                                        |    |                   |                  |   |              |                                                                      |   |              |                   |
|-----|---------------------------------------------------------------------------------------------------------------|-------------------------------------------------------------------------------------------------------------------------------------------------------------------------------------------------------------------------------------------------------------------------|-----------------------------------------------------------------------------------------------------------------------------------------------------------------------------------------------------------------------------------------------------------------------------------------------------------------------------------------------------------------------------------------------------------------------------------------------------------------------------------------------------------------------------------------------------------------------------------------------------------------------------------------------------------------------------------------------------------------------|---|------------------|----------------------------------------------------------------------------------------------------------------|----|------------------|------------------------------------------------------------------------|---|------------------|--------------------------------------------------------------|---|------------------|---------------------------------------------------|----|-------------------|----------------------------------------|----|-------------------|------------------|---|--------------|----------------------------------------------------------------------|---|--------------|-------------------|
| 346 | risk_ass_yn                                                                                                   | <p>Has your gynecologist talked to you about risks that may be increased with PCOS?</p> <p><i>If you are not sure what is meant by this, you can select "Yes" and look at the subcategories. If there is nothing that applies, you can also switch back to "No"</i></p> | <p>radio, Required</p> <table border="1"> <tr><td>1</td><td>Yes</td></tr> <tr><td>0</td><td>No</td></tr> </table>                                                                                                                                                                                                                                                                                                                                                                                                                                                                                                                                                                                                     | 1 | Yes              | 0                                                                                                              | No |                  |                                                                        |   |                  |                                                              |   |                  |                                                   |    |                   |                                        |    |                   |                  |   |              |                                                                      |   |              |                   |
| 1   | Yes                                                                                                           |                                                                                                                                                                                                                                                                         |                                                                                                                                                                                                                                                                                                                                                                                                                                                                                                                                                                                                                                                                                                                       |   |                  |                                                                                                                |    |                  |                                                                        |   |                  |                                                              |   |                  |                                                   |    |                   |                                        |    |                   |                  |   |              |                                                                      |   |              |                   |
| 0   | No                                                                                                            |                                                                                                                                                                                                                                                                         |                                                                                                                                                                                                                                                                                                                                                                                                                                                                                                                                                                                                                                                                                                                       |   |                  |                                                                                                                |    |                  |                                                                        |   |                  |                                                              |   |                  |                                                   |    |                   |                                        |    |                   |                  |   |              |                                                                      |   |              |                   |
| 347 | risk_ass_spec<br>Show the field ONLY if: [risk_ass_yn] = '1'                                                  | <p>Please select which topics have been addressed:</p>                                                                                                                                                                                                                  | <p>checkbox, Required</p> <table border="1"> <tr> <td>1</td> <td>risk_ass_spec__1</td> <td>Cardiovascular diseases (e.g. high blood pressure, heart attack, stroke, thrombosis, pulmonary embolism, etc.)</td> </tr> <tr> <td>2</td> <td>risk_ass_spec__2</td> <td>Diabetic disorders (e.g. diabetes, pre-diabetes, gestational diabetes)</td> </tr> <tr> <td>3</td> <td>risk_ass_spec__3</td> <td>Obstructive sleep apnea (pauses in breathing while sleeping)</td> </tr> <tr> <td>4</td> <td>risk_ass_spec__4</td> <td>Endometrial cancer (cancer of the uterine mucosa)</td> </tr> <tr> <td>88</td> <td>risk_ass_spec__88</td> <td>other</td> </tr> </table>                                                       | 1 | risk_ass_spec__1 | Cardiovascular diseases (e.g. high blood pressure, heart attack, stroke, thrombosis, pulmonary embolism, etc.) | 2  | risk_ass_spec__2 | Diabetic disorders (e.g. diabetes, pre-diabetes, gestational diabetes) | 3 | risk_ass_spec__3 | Obstructive sleep apnea (pauses in breathing while sleeping) | 4 | risk_ass_spec__4 | Endometrial cancer (cancer of the uterine mucosa) | 88 | risk_ass_spec__88 | other                                  |    |                   |                  |   |              |                                                                      |   |              |                   |
| 1   | risk_ass_spec__1                                                                                              | Cardiovascular diseases (e.g. high blood pressure, heart attack, stroke, thrombosis, pulmonary embolism, etc.)                                                                                                                                                          |                                                                                                                                                                                                                                                                                                                                                                                                                                                                                                                                                                                                                                                                                                                       |   |                  |                                                                                                                |    |                  |                                                                        |   |                  |                                                              |   |                  |                                                   |    |                   |                                        |    |                   |                  |   |              |                                                                      |   |              |                   |
| 2   | risk_ass_spec__2                                                                                              | Diabetic disorders (e.g. diabetes, pre-diabetes, gestational diabetes)                                                                                                                                                                                                  |                                                                                                                                                                                                                                                                                                                                                                                                                                                                                                                                                                                                                                                                                                                       |   |                  |                                                                                                                |    |                  |                                                                        |   |                  |                                                              |   |                  |                                                   |    |                   |                                        |    |                   |                  |   |              |                                                                      |   |              |                   |
| 3   | risk_ass_spec__3                                                                                              | Obstructive sleep apnea (pauses in breathing while sleeping)                                                                                                                                                                                                            |                                                                                                                                                                                                                                                                                                                                                                                                                                                                                                                                                                                                                                                                                                                       |   |                  |                                                                                                                |    |                  |                                                                        |   |                  |                                                              |   |                  |                                                   |    |                   |                                        |    |                   |                  |   |              |                                                                      |   |              |                   |
| 4   | risk_ass_spec__4                                                                                              | Endometrial cancer (cancer of the uterine mucosa)                                                                                                                                                                                                                       |                                                                                                                                                                                                                                                                                                                                                                                                                                                                                                                                                                                                                                                                                                                       |   |                  |                                                                                                                |    |                  |                                                                        |   |                  |                                                              |   |                  |                                                   |    |                   |                                        |    |                   |                  |   |              |                                                                      |   |              |                   |
| 88  | risk_ass_spec__88                                                                                             | other                                                                                                                                                                                                                                                                   |                                                                                                                                                                                                                                                                                                                                                                                                                                                                                                                                                                                                                                                                                                                       |   |                  |                                                                                                                |    |                  |                                                                        |   |                  |                                                              |   |                  |                                                   |    |                   |                                        |    |                   |                  |   |              |                                                                      |   |              |                   |
| 348 | risk_ass_spec_88<br>Show the field ONLY if: [risk_ass_spec(88)] = '1'                                         | <p>What other risks?</p> <p><i>Please specify.</i></p>                                                                                                                                                                                                                  | <p>notes, Required</p>                                                                                                                                                                                                                                                                                                                                                                                                                                                                                                                                                                                                                                                                                                |   |                  |                                                                                                                |    |                  |                                                                        |   |                  |                                                              |   |                  |                                                   |    |                   |                                        |    |                   |                  |   |              |                                                                      |   |              |                   |
| 349 | risk_cvrf                                                                                                     | <p>Section Header: <i>Cardiovascular diseases and weight</i></p> <p>Do you have any of the following conditions? Please select the applicable ones.</p>                                                                                                                 | <p>checkbox, Required</p> <table border="1"> <tr><td>1</td><td>risk_cvrf__1</td><td>smoking</td></tr> <tr><td>2</td><td>risk_cvrf__2</td><td>overweight</td></tr> <tr><td>3</td><td>risk_cvrf__3</td><td>high cholesterol levels</td></tr> <tr><td>4</td><td>risk_cvrf__4</td><td>high blood pressure</td></tr> <tr><td>5</td><td>risk_cvrf__5</td><td>impaired glucose-tolerance or diabetes</td></tr> <tr><td>6</td><td>risk_cvrf__6</td><td>lack of exercise</td></tr> <tr><td>7</td><td>risk_cvrf__7</td><td>Cardiovascular diseases in closer family (e.g. heart attack, stroke)</td></tr> <tr><td>0</td><td>risk_cvrf__0</td><td>None of the above</td></tr> </table> <p>Field Annotation: @NONEOTHEABOVE=0</p> | 1 | risk_cvrf__1     | smoking                                                                                                        | 2  | risk_cvrf__2     | overweight                                                             | 3 | risk_cvrf__3     | high cholesterol levels                                      | 4 | risk_cvrf__4     | high blood pressure                               | 5  | risk_cvrf__5      | impaired glucose-tolerance or diabetes | 6  | risk_cvrf__6      | lack of exercise | 7 | risk_cvrf__7 | Cardiovascular diseases in closer family (e.g. heart attack, stroke) | 0 | risk_cvrf__0 | None of the above |
| 1   | risk_cvrf__1                                                                                                  | smoking                                                                                                                                                                                                                                                                 |                                                                                                                                                                                                                                                                                                                                                                                                                                                                                                                                                                                                                                                                                                                       |   |                  |                                                                                                                |    |                  |                                                                        |   |                  |                                                              |   |                  |                                                   |    |                   |                                        |    |                   |                  |   |              |                                                                      |   |              |                   |
| 2   | risk_cvrf__2                                                                                                  | overweight                                                                                                                                                                                                                                                              |                                                                                                                                                                                                                                                                                                                                                                                                                                                                                                                                                                                                                                                                                                                       |   |                  |                                                                                                                |    |                  |                                                                        |   |                  |                                                              |   |                  |                                                   |    |                   |                                        |    |                   |                  |   |              |                                                                      |   |              |                   |
| 3   | risk_cvrf__3                                                                                                  | high cholesterol levels                                                                                                                                                                                                                                                 |                                                                                                                                                                                                                                                                                                                                                                                                                                                                                                                                                                                                                                                                                                                       |   |                  |                                                                                                                |    |                  |                                                                        |   |                  |                                                              |   |                  |                                                   |    |                   |                                        |    |                   |                  |   |              |                                                                      |   |              |                   |
| 4   | risk_cvrf__4                                                                                                  | high blood pressure                                                                                                                                                                                                                                                     |                                                                                                                                                                                                                                                                                                                                                                                                                                                                                                                                                                                                                                                                                                                       |   |                  |                                                                                                                |    |                  |                                                                        |   |                  |                                                              |   |                  |                                                   |    |                   |                                        |    |                   |                  |   |              |                                                                      |   |              |                   |
| 5   | risk_cvrf__5                                                                                                  | impaired glucose-tolerance or diabetes                                                                                                                                                                                                                                  |                                                                                                                                                                                                                                                                                                                                                                                                                                                                                                                                                                                                                                                                                                                       |   |                  |                                                                                                                |    |                  |                                                                        |   |                  |                                                              |   |                  |                                                   |    |                   |                                        |    |                   |                  |   |              |                                                                      |   |              |                   |
| 6   | risk_cvrf__6                                                                                                  | lack of exercise                                                                                                                                                                                                                                                        |                                                                                                                                                                                                                                                                                                                                                                                                                                                                                                                                                                                                                                                                                                                       |   |                  |                                                                                                                |    |                  |                                                                        |   |                  |                                                              |   |                  |                                                   |    |                   |                                        |    |                   |                  |   |              |                                                                      |   |              |                   |
| 7   | risk_cvrf__7                                                                                                  | Cardiovascular diseases in closer family (e.g. heart attack, stroke)                                                                                                                                                                                                    |                                                                                                                                                                                                                                                                                                                                                                                                                                                                                                                                                                                                                                                                                                                       |   |                  |                                                                                                                |    |                  |                                                                        |   |                  |                                                              |   |                  |                                                   |    |                   |                                        |    |                   |                  |   |              |                                                                      |   |              |                   |
| 0   | risk_cvrf__0                                                                                                  | None of the above                                                                                                                                                                                                                                                       |                                                                                                                                                                                                                                                                                                                                                                                                                                                                                                                                                                                                                                                                                                                       |   |                  |                                                                                                                |    |                  |                                                                        |   |                  |                                                              |   |                  |                                                   |    |                   |                                        |    |                   |                  |   |              |                                                                      |   |              |                   |
| 350 | risk_cvd_yn                                                                                                   | <p>Do you have/have you had any cardiovascular disease?</p> <p><i>If you are not sure what is meant by this, you can select "Yes" and look at the subcategories. If there is nothing that applies, you can also switch back to "No"</i></p>                             | <p>radio, Required</p> <table border="1"> <tr><td>1</td><td>Yes</td></tr> <tr><td>0</td><td>No</td></tr> </table>                                                                                                                                                                                                                                                                                                                                                                                                                                                                                                                                                                                                     | 1 | Yes              | 0                                                                                                              | No |                  |                                                                        |   |                  |                                                              |   |                  |                                                   |    |                   |                                        |    |                   |                  |   |              |                                                                      |   |              |                   |
| 1   | Yes                                                                                                           |                                                                                                                                                                                                                                                                         |                                                                                                                                                                                                                                                                                                                                                                                                                                                                                                                                                                                                                                                                                                                       |   |                  |                                                                                                                |    |                  |                                                                        |   |                  |                                                              |   |                  |                                                   |    |                   |                                        |    |                   |                  |   |              |                                                                      |   |              |                   |
| 0   | No                                                                                                            |                                                                                                                                                                                                                                                                         |                                                                                                                                                                                                                                                                                                                                                                                                                                                                                                                                                                                                                                                                                                                       |   |                  |                                                                                                                |    |                  |                                                                        |   |                  |                                                              |   |                  |                                                   |    |                   |                                        |    |                   |                  |   |              |                                                                      |   |              |                   |
| 351 | risk_cvd_spec<br>Show the field ONLY if: [risk_cvd_yn] = '1'                                                  | <p>Please select the applicable ones:</p>                                                                                                                                                                                                                               | <p>checkbox, Required</p> <table border="1"> <tr> <td>1</td> <td>risk_cvd_spec__1</td> <td>high blood pressure</td> </tr> <tr> <td>2</td> <td>risk_cvd_spec__2</td> <td>heart attack</td> </tr> <tr> <td>3</td> <td>risk_cvd_spec__3</td> <td>stroke</td> </tr> <tr> <td>4</td> <td>risk_cvd_spec__4</td> <td>pulmonary embolism</td> </tr> <tr> <td>5</td> <td>risk_cvd_spec__5</td> <td>thrombosis / embolism (e.g. leg/arm)</td> </tr> <tr> <td>88</td> <td>risk_cvd_spec__88</td> <td>other</td> </tr> </table>                                                                                                                                                                                                   | 1 | risk_cvd_spec__1 | high blood pressure                                                                                            | 2  | risk_cvd_spec__2 | heart attack                                                           | 3 | risk_cvd_spec__3 | stroke                                                       | 4 | risk_cvd_spec__4 | pulmonary embolism                                | 5  | risk_cvd_spec__5  | thrombosis / embolism (e.g. leg/arm)   | 88 | risk_cvd_spec__88 | other            |   |              |                                                                      |   |              |                   |
| 1   | risk_cvd_spec__1                                                                                              | high blood pressure                                                                                                                                                                                                                                                     |                                                                                                                                                                                                                                                                                                                                                                                                                                                                                                                                                                                                                                                                                                                       |   |                  |                                                                                                                |    |                  |                                                                        |   |                  |                                                              |   |                  |                                                   |    |                   |                                        |    |                   |                  |   |              |                                                                      |   |              |                   |
| 2   | risk_cvd_spec__2                                                                                              | heart attack                                                                                                                                                                                                                                                            |                                                                                                                                                                                                                                                                                                                                                                                                                                                                                                                                                                                                                                                                                                                       |   |                  |                                                                                                                |    |                  |                                                                        |   |                  |                                                              |   |                  |                                                   |    |                   |                                        |    |                   |                  |   |              |                                                                      |   |              |                   |
| 3   | risk_cvd_spec__3                                                                                              | stroke                                                                                                                                                                                                                                                                  |                                                                                                                                                                                                                                                                                                                                                                                                                                                                                                                                                                                                                                                                                                                       |   |                  |                                                                                                                |    |                  |                                                                        |   |                  |                                                              |   |                  |                                                   |    |                   |                                        |    |                   |                  |   |              |                                                                      |   |              |                   |
| 4   | risk_cvd_spec__4                                                                                              | pulmonary embolism                                                                                                                                                                                                                                                      |                                                                                                                                                                                                                                                                                                                                                                                                                                                                                                                                                                                                                                                                                                                       |   |                  |                                                                                                                |    |                  |                                                                        |   |                  |                                                              |   |                  |                                                   |    |                   |                                        |    |                   |                  |   |              |                                                                      |   |              |                   |
| 5   | risk_cvd_spec__5                                                                                              | thrombosis / embolism (e.g. leg/arm)                                                                                                                                                                                                                                    |                                                                                                                                                                                                                                                                                                                                                                                                                                                                                                                                                                                                                                                                                                                       |   |                  |                                                                                                                |    |                  |                                                                        |   |                  |                                                              |   |                  |                                                   |    |                   |                                        |    |                   |                  |   |              |                                                                      |   |              |                   |
| 88  | risk_cvd_spec__88                                                                                             | other                                                                                                                                                                                                                                                                   |                                                                                                                                                                                                                                                                                                                                                                                                                                                                                                                                                                                                                                                                                                                       |   |                  |                                                                                                                |    |                  |                                                                        |   |                  |                                                              |   |                  |                                                   |    |                   |                                        |    |                   |                  |   |              |                                                                      |   |              |                   |
| 352 | risk_cvd_spec_88<br>Show the field ONLY if: [risk_cvd_spec(88)] = '1'                                         | <p>What other Cardiovascular diseases?</p> <p><i>Please specify.</i></p>                                                                                                                                                                                                | <p>notes, Required</p>                                                                                                                                                                                                                                                                                                                                                                                                                                                                                                                                                                                                                                                                                                |   |                  |                                                                                                                |    |                  |                                                                        |   |                  |                                                              |   |                  |                                                   |    |                   |                                        |    |                   |                  |   |              |                                                                      |   |              |                   |
| 353 | risk_screen_weight_yn                                                                                         | <p>Is your weight measured regularly by your gynecologist?</p> <p><i>Regular means at least once a year.</i></p>                                                                                                                                                        | <p>radio, Required</p> <table border="1"> <tr><td>1</td><td>Yes</td></tr> <tr><td>0</td><td>No</td></tr> </table>                                                                                                                                                                                                                                                                                                                                                                                                                                                                                                                                                                                                     | 1 | Yes              | 0                                                                                                              | No |                  |                                                                        |   |                  |                                                              |   |                  |                                                   |    |                   |                                        |    |                   |                  |   |              |                                                                      |   |              |                   |
| 1   | Yes                                                                                                           |                                                                                                                                                                                                                                                                         |                                                                                                                                                                                                                                                                                                                                                                                                                                                                                                                                                                                                                                                                                                                       |   |                  |                                                                                                                |    |                  |                                                                        |   |                  |                                                              |   |                  |                                                   |    |                   |                                        |    |                   |                  |   |              |                                                                      |   |              |                   |
| 0   | No                                                                                                            |                                                                                                                                                                                                                                                                         |                                                                                                                                                                                                                                                                                                                                                                                                                                                                                                                                                                                                                                                                                                                       |   |                  |                                                                                                                |    |                  |                                                                        |   |                  |                                                              |   |                  |                                                   |    |                   |                                        |    |                   |                  |   |              |                                                                      |   |              |                   |
| 354 | risk_screen_bd_yn                                                                                             | <p>Is your blood pressure measured regularly by your gynecologist?</p> <p><i>Regular means at least once a year.</i></p>                                                                                                                                                | <p>radio, Required</p> <table border="1"> <tr><td>1</td><td>Yes</td></tr> <tr><td>0</td><td>No</td></tr> </table>                                                                                                                                                                                                                                                                                                                                                                                                                                                                                                                                                                                                     | 1 | Yes              | 0                                                                                                              | No |                  |                                                                        |   |                  |                                                              |   |                  |                                                   |    |                   |                                        |    |                   |                  |   |              |                                                                      |   |              |                   |
| 1   | Yes                                                                                                           |                                                                                                                                                                                                                                                                         |                                                                                                                                                                                                                                                                                                                                                                                                                                                                                                                                                                                                                                                                                                                       |   |                  |                                                                                                                |    |                  |                                                                        |   |                  |                                                              |   |                  |                                                   |    |                   |                                        |    |                   |                  |   |              |                                                                      |   |              |                   |
| 0   | No                                                                                                            |                                                                                                                                                                                                                                                                         |                                                                                                                                                                                                                                                                                                                                                                                                                                                                                                                                                                                                                                                                                                                       |   |                  |                                                                                                                |    |                  |                                                                        |   |                  |                                                              |   |                  |                                                   |    |                   |                                        |    |                   |                  |   |              |                                                                      |   |              |                   |
| 355 | risk_screen_chol_yn                                                                                           | <p>Is your blood cholesterol level measured regularly by your gynecologist?</p> <p><i>Regular means at least once a year.</i></p>                                                                                                                                       | <p>radio, Required</p> <table border="1"> <tr><td>1</td><td>Yes</td></tr> <tr><td>0</td><td>No</td></tr> <tr><td>99</td><td>Unknown</td></tr> </table>                                                                                                                                                                                                                                                                                                                                                                                                                                                                                                                                                                | 1 | Yes              | 0                                                                                                              | No | 99               | Unknown                                                                |   |                  |                                                              |   |                  |                                                   |    |                   |                                        |    |                   |                  |   |              |                                                                      |   |              |                   |
| 1   | Yes                                                                                                           |                                                                                                                                                                                                                                                                         |                                                                                                                                                                                                                                                                                                                                                                                                                                                                                                                                                                                                                                                                                                                       |   |                  |                                                                                                                |    |                  |                                                                        |   |                  |                                                              |   |                  |                                                   |    |                   |                                        |    |                   |                  |   |              |                                                                      |   |              |                   |
| 0   | No                                                                                                            |                                                                                                                                                                                                                                                                         |                                                                                                                                                                                                                                                                                                                                                                                                                                                                                                                                                                                                                                                                                                                       |   |                  |                                                                                                                |    |                  |                                                                        |   |                  |                                                              |   |                  |                                                   |    |                   |                                        |    |                   |                  |   |              |                                                                      |   |              |                   |
| 99  | Unknown                                                                                                       |                                                                                                                                                                                                                                                                         |                                                                                                                                                                                                                                                                                                                                                                                                                                                                                                                                                                                                                                                                                                                       |   |                  |                                                                                                                |    |                  |                                                                        |   |                  |                                                              |   |                  |                                                   |    |                   |                                        |    |                   |                  |   |              |                                                                      |   |              |                   |
| 356 | risk_screen_chol_ha_yn<br>Show the field ONLY if: [risk_screen_chol_yn] = '0' or [risk_screen_chol_yn] = '99' | <p>Is your blood cholesterol level measured regularly by your primary care physician?</p> <p><i>Regular means at least once a year.</i></p>                                                                                                                             | <p>radio, Required</p> <table border="1"> <tr><td>1</td><td>Yes</td></tr> <tr><td>0</td><td>No</td></tr> <tr><td>99</td><td>Unknown</td></tr> </table>                                                                                                                                                                                                                                                                                                                                                                                                                                                                                                                                                                | 1 | Yes              | 0                                                                                                              | No | 99               | Unknown                                                                |   |                  |                                                              |   |                  |                                                   |    |                   |                                        |    |                   |                  |   |              |                                                                      |   |              |                   |
| 1   | Yes                                                                                                           |                                                                                                                                                                                                                                                                         |                                                                                                                                                                                                                                                                                                                                                                                                                                                                                                                                                                                                                                                                                                                       |   |                  |                                                                                                                |    |                  |                                                                        |   |                  |                                                              |   |                  |                                                   |    |                   |                                        |    |                   |                  |   |              |                                                                      |   |              |                   |
| 0   | No                                                                                                            |                                                                                                                                                                                                                                                                         |                                                                                                                                                                                                                                                                                                                                                                                                                                                                                                                                                                                                                                                                                                                       |   |                  |                                                                                                                |    |                  |                                                                        |   |                  |                                                              |   |                  |                                                   |    |                   |                                        |    |                   |                  |   |              |                                                                      |   |              |                   |
| 99  | Unknown                                                                                                       |                                                                                                                                                                                                                                                                         |                                                                                                                                                                                                                                                                                                                                                                                                                                                                                                                                                                                                                                                                                                                       |   |                  |                                                                                                                |    |                  |                                                                        |   |                  |                                                              |   |                  |                                                   |    |                   |                                        |    |                   |                  |   |              |                                                                      |   |              |                   |
| 357 | risk_cv_adv_yn                                                                                                | <p>Have you been consulted by your gynecologist regarding increased risk for cardiovascular disease in PCOS and the risk factors for cardiovascular disease?</p>                                                                                                        | <p>radio, Required</p> <table border="1"> <tr><td>1</td><td>Yes</td></tr> <tr><td>0</td><td>No</td></tr> </table>                                                                                                                                                                                                                                                                                                                                                                                                                                                                                                                                                                                                     | 1 | Yes              | 0                                                                                                              | No |                  |                                                                        |   |                  |                                                              |   |                  |                                                   |    |                   |                                        |    |                   |                  |   |              |                                                                      |   |              |                   |
| 1   | Yes                                                                                                           |                                                                                                                                                                                                                                                                         |                                                                                                                                                                                                                                                                                                                                                                                                                                                                                                                                                                                                                                                                                                                       |   |                  |                                                                                                                |    |                  |                                                                        |   |                  |                                                              |   |                  |                                                   |    |                   |                                        |    |                   |                  |   |              |                                                                      |   |              |                   |
| 0   | No                                                                                                            |                                                                                                                                                                                                                                                                         |                                                                                                                                                                                                                                                                                                                                                                                                                                                                                                                                                                                                                                                                                                                       |   |                  |                                                                                                                |    |                  |                                                                        |   |                  |                                                              |   |                  |                                                   |    |                   |                                        |    |                   |                  |   |              |                                                                      |   |              |                   |

|     |                                                                              |                                                                                                                                                                                                  |                                                                                                                                                                                                                                                                                                                                                                                                             |
|-----|------------------------------------------------------------------------------|--------------------------------------------------------------------------------------------------------------------------------------------------------------------------------------------------|-------------------------------------------------------------------------------------------------------------------------------------------------------------------------------------------------------------------------------------------------------------------------------------------------------------------------------------------------------------------------------------------------------------|
| 358 | risk_cv_adv_sc<br>Show the field ONLY if:<br>[risk_cv_adv_yn] = '1'          | Please rate your satisfaction with consultation regarding risk for cardiovascular diseases.<br><i>Drag the blue slider and drop it at the desired position.</i>                                  | slider (number), Required<br>Slider labels: 0, 50, 100<br>Custom alignment: RH                                                                                                                                                                                                                                                                                                                              |
| 359 | risk_cv_adv_wish<br>Show the field ONLY if:<br>[risk_cv_adv_yn] = '0'        | Would you have wished for a consultation by your gynecologist regarding risk for cardiovascular diseases?                                                                                        | radio, Required<br>1 Yes<br>0 No                                                                                                                                                                                                                                                                                                                                                                            |
| 360 | risk_screen_bz_yn                                                            | Section Header: <i>glucose tolerance and diabetes</i><br>Is your blood glucose level measured regularly by your gynecologist?<br><i>Regular here means at least once every three years.</i>      | radio, Required<br>1 Yes<br>0 No<br>99 Unknown                                                                                                                                                                                                                                                                                                                                                              |
| 361 | risk_screen_bz_ha_yn<br>Show the field ONLY if:<br>[risk_screen_bz_yn] = '0' | Is your blood glucose level measured regularly by your primary care physician or diabetologist?<br><i>Regular here means at least once every three years.</i>                                    | radio, Required<br>1 Yes<br>0 No<br>99 Unknown                                                                                                                                                                                                                                                                                                                                                              |
| 362 | risk_screen_bz_ogtt_yn<br>Show the field ONLY if: [kw_ss_yn] = '1'           | Did you have a oral glucose tolerance test (=oGTT) done before pregnancy??<br><i>Fasting blood glucose measurement, then drink glucose solution followed by multiple measurements of glucose</i> | radio, Required<br>1 Yes<br>0 No<br>99 Unknown                                                                                                                                                                                                                                                                                                                                                              |
| 363 | risk_screen_bz_ogtt_yn_2<br>Show the field ONLY if: [kw_ss_yn] = '1'         | Did you have a oral glucose tolerance test (=oGTT) done during pregnancy??<br><i>Fasting blood glucose measurement, then drink glucose solution followed by multiple measurements of glucose</i> | radio, Required<br>1 Yes<br>0 No<br>99 Unknown                                                                                                                                                                                                                                                                                                                                                              |
| 364 | risk_bz_adv_yn                                                               | Have you been consulted by your gynecologist regarding increased risk for diabetes in PCOS?                                                                                                      | radio, Required<br>1 Yes<br>0 No                                                                                                                                                                                                                                                                                                                                                                            |
| 365 | risk_bz_adv_sc<br>Show the field ONLY if:<br>[risk_bz_adv_yn] = '1'          | Please rate your satisfaction with consultation regarding risk for diabetes.<br><i>Drag the blue slider and drop it at the desired position.</i>                                                 | slider (number), Required<br>Slider labels: 0, 50, 100<br>Custom alignment: RH                                                                                                                                                                                                                                                                                                                              |
| 366 | risk_bz_adv_wish<br>Show the field ONLY if:<br>[risk_bz_adv_yn] = '0'        | Would you have wished for a consultation by your gynecologist regarding risk for diabetes?                                                                                                       | radio, Required<br>1 Yes<br>0 No                                                                                                                                                                                                                                                                                                                                                                            |
| 367 | risk_osas_symp                                                               | Section Header: <i>Obstructive sleep apnea</i><br>Please select the applicable ones:                                                                                                             | checkbox, Required<br>1 risk_osas_symp__1 snoring<br>2 risk_osas_symp__2 Breathing pauses during sleep (e.g. observed by partner)<br>3 risk_osas_symp__3 waking unrefreshed from sleep<br>4 risk_osas_symp__4 daytime sleepiness<br>5 risk_osas_symp__5 morning headaches<br>6 risk_osas_symp__6 Concentration difficulties<br>0 risk_osas_symp__0 None of the above<br>Field Annotation: @NONEOFTHEABOVE=0 |
| 368 | risk_osas_yn                                                                 | Are you known to have sleep apnea syndrome?<br><i>Select "Yes" only if this has been diagnosed by a physician.</i>                                                                               | radio, Required<br>1 Yes<br>0 No                                                                                                                                                                                                                                                                                                                                                                            |
| 369 | risk_osas_psg_yn                                                             | Have you ever been to a sleep medicine specialist or sleep lab?                                                                                                                                  | radio, Required<br>1 Yes<br>0 No                                                                                                                                                                                                                                                                                                                                                                            |
| 370 | risk_osas_adv_yn                                                             | Have you been counseled by your gynecologist regarding increased risk for sleep apnea (breathing pauses during sleep)?                                                                           | radio, Required<br>1 Yes<br>0 No                                                                                                                                                                                                                                                                                                                                                                            |
| 371 | risk_osas_adv_sc<br>Show the field ONLY if:<br>[risk_osas_adv_yn] = '1'      | Please rate your satisfaction with consultation regarding risk for sleep apnea.<br><i>Drag the blue slider and drop it at the desired position.</i>                                              | slider (number), Required<br>Slider labels: 0, 50, 100<br>Custom alignment: RH                                                                                                                                                                                                                                                                                                                              |
| 372 | risk_osas_adv_wish<br>Show the field ONLY if:<br>[risk_osas_adv_yn] = '0'    | Would you have wished for a consultation by your gynecologist regarding risk for sleep apnea?                                                                                                    | radio, Required<br>1 Yes<br>0 No                                                                                                                                                                                                                                                                                                                                                                            |
| 373 | risk_endca_yn                                                                | Section Header: <i>Endometrial Cancer</i><br>Do you suffer or have you suffered from endometrial cancer?<br><i>Endometrial cancer = cancer of the mucus ("endometrium") of the uterus</i>        | radio, Required<br>1 Yes<br>0 No                                                                                                                                                                                                                                                                                                                                                                            |

|     |                                                                              |                                                                                                                                                                                                                                                                                  |                                                                                                                                                                                                                                                                                                                                                                                                                                                                                                                                                                                                |   |                    |                                   |            |                    |                                               |   |                    |                                     |   |                    |                                                   |   |                    |                      |    |                     |       |
|-----|------------------------------------------------------------------------------|----------------------------------------------------------------------------------------------------------------------------------------------------------------------------------------------------------------------------------------------------------------------------------|------------------------------------------------------------------------------------------------------------------------------------------------------------------------------------------------------------------------------------------------------------------------------------------------------------------------------------------------------------------------------------------------------------------------------------------------------------------------------------------------------------------------------------------------------------------------------------------------|---|--------------------|-----------------------------------|------------|--------------------|-----------------------------------------------|---|--------------------|-------------------------------------|---|--------------------|---------------------------------------------------|---|--------------------|----------------------|----|---------------------|-------|
| 374 | risk_endca_adv_yn                                                            | Have you been advised by your gynecologist regarding slightly increased risk for endometrial cancer?                                                                                                                                                                             | radio, Required<br><table border="1"> <tr><td>1</td><td>Yes</td></tr> <tr><td>0</td><td>No</td></tr> </table>                                                                                                                                                                                                                                                                                                                                                                                                                                                                                  | 1 | Yes                | 0                                 | No         |                    |                                               |   |                    |                                     |   |                    |                                                   |   |                    |                      |    |                     |       |
| 1   | Yes                                                                          |                                                                                                                                                                                                                                                                                  |                                                                                                                                                                                                                                                                                                                                                                                                                                                                                                                                                                                                |   |                    |                                   |            |                    |                                               |   |                    |                                     |   |                    |                                                   |   |                    |                      |    |                     |       |
| 0   | No                                                                           |                                                                                                                                                                                                                                                                                  |                                                                                                                                                                                                                                                                                                                                                                                                                                                                                                                                                                                                |   |                    |                                   |            |                    |                                               |   |                    |                                     |   |                    |                                                   |   |                    |                      |    |                     |       |
| 375 | risk_endca_adv_sc<br>Show the field ONLY if:<br>[risk_endca_adv_yn] = '1'    | Please rate your satisfaction with consultation regarding slightly increased risk for endometrial cancer.<br><i>Drag the blue slider and drop it at the desired position.</i>                                                                                                    | slider (number), Required<br>Slider labels: 0, 50, 100<br>Custom alignment: RH                                                                                                                                                                                                                                                                                                                                                                                                                                                                                                                 |   |                    |                                   |            |                    |                                               |   |                    |                                     |   |                    |                                                   |   |                    |                      |    |                     |       |
| 376 | risk_endca_adv_wish<br>Show the field ONLY if:<br>[risk_endca_adv_yn] = '0'  | Would you have wished for a consultation by your gynecologist regarding risk for slightly increased risk for endometrial cancer?                                                                                                                                                 | radio, Required<br><table border="1"> <tr><td>1</td><td>Yes</td></tr> <tr><td>0</td><td>No</td></tr> </table>                                                                                                                                                                                                                                                                                                                                                                                                                                                                                  | 1 | Yes                | 0                                 | No         |                    |                                               |   |                    |                                     |   |                    |                                                   |   |                    |                      |    |                     |       |
| 1   | Yes                                                                          |                                                                                                                                                                                                                                                                                  |                                                                                                                                                                                                                                                                                                                                                                                                                                                                                                                                                                                                |   |                    |                                   |            |                    |                                               |   |                    |                                     |   |                    |                                                   |   |                    |                      |    |                     |       |
| 0   | No                                                                           |                                                                                                                                                                                                                                                                                  |                                                                                                                                                                                                                                                                                                                                                                                                                                                                                                                                                                                                |   |                    |                                   |            |                    |                                               |   |                    |                                     |   |                    |                                                   |   |                    |                      |    |                     |       |
| 377 | risk_satisf_sc                                                               | Section Header: <i>overall satisfaction prevention and monitoring</i><br>Please rate your overall satisfaction with the medical care you receive from your gynecologist regarding prevention and monitoring?<br><i>Drag the blue slider and drop it at the desired position.</i> | slider (number), Required<br>Slider labels: 0, 50, 100<br>Custom alignment: RH                                                                                                                                                                                                                                                                                                                                                                                                                                                                                                                 |   |                    |                                   |            |                    |                                               |   |                    |                                     |   |                    |                                                   |   |                    |                      |    |                     |       |
| 378 | risk_addit_yn                                                                | Would you like additional consultation?                                                                                                                                                                                                                                          | radio, Required<br><table border="1"> <tr><td>1</td><td>Yes</td></tr> <tr><td>0</td><td>No</td></tr> </table>                                                                                                                                                                                                                                                                                                                                                                                                                                                                                  | 1 | Yes                | 0                                 | No         |                    |                                               |   |                    |                                     |   |                    |                                                   |   |                    |                      |    |                     |       |
| 1   | Yes                                                                          |                                                                                                                                                                                                                                                                                  |                                                                                                                                                                                                                                                                                                                                                                                                                                                                                                                                                                                                |   |                    |                                   |            |                    |                                               |   |                    |                                     |   |                    |                                                   |   |                    |                      |    |                     |       |
| 0   | No                                                                           |                                                                                                                                                                                                                                                                                  |                                                                                                                                                                                                                                                                                                                                                                                                                                                                                                                                                                                                |   |                    |                                   |            |                    |                                               |   |                    |                                     |   |                    |                                                   |   |                    |                      |    |                     |       |
| 379 | risk_addit_spec<br>Show the field ONLY if:<br>[risk_addit_yn] = '1'          | Please select what you would wish to have in addition:                                                                                                                                                                                                                           | checkbox, Required<br><table border="1"> <tr><td>1</td><td>risk_addit_spec__1</td><td>More consultation and reassurance</td></tr> <tr><td>2</td><td>risk_addit_spec__2</td><td>More information providing (such as booklets)</td></tr> <tr><td>3</td><td>risk_addit_spec__3</td><td>More possibilities to ask questions</td></tr> <tr><td>4</td><td>risk_addit_spec__4</td><td>More examinations (blood tests, ultrasound, etc.)</td></tr> <tr><td>5</td><td>risk_addit_spec__5</td><td>More therapy options</td></tr> <tr><td>88</td><td>risk_addit_spec__88</td><td>Other</td></tr> </table> | 1 | risk_addit_spec__1 | More consultation and reassurance | 2          | risk_addit_spec__2 | More information providing (such as booklets) | 3 | risk_addit_spec__3 | More possibilities to ask questions | 4 | risk_addit_spec__4 | More examinations (blood tests, ultrasound, etc.) | 5 | risk_addit_spec__5 | More therapy options | 88 | risk_addit_spec__88 | Other |
| 1   | risk_addit_spec__1                                                           | More consultation and reassurance                                                                                                                                                                                                                                                |                                                                                                                                                                                                                                                                                                                                                                                                                                                                                                                                                                                                |   |                    |                                   |            |                    |                                               |   |                    |                                     |   |                    |                                                   |   |                    |                      |    |                     |       |
| 2   | risk_addit_spec__2                                                           | More information providing (such as booklets)                                                                                                                                                                                                                                    |                                                                                                                                                                                                                                                                                                                                                                                                                                                                                                                                                                                                |   |                    |                                   |            |                    |                                               |   |                    |                                     |   |                    |                                                   |   |                    |                      |    |                     |       |
| 3   | risk_addit_spec__3                                                           | More possibilities to ask questions                                                                                                                                                                                                                                              |                                                                                                                                                                                                                                                                                                                                                                                                                                                                                                                                                                                                |   |                    |                                   |            |                    |                                               |   |                    |                                     |   |                    |                                                   |   |                    |                      |    |                     |       |
| 4   | risk_addit_spec__4                                                           | More examinations (blood tests, ultrasound, etc.)                                                                                                                                                                                                                                |                                                                                                                                                                                                                                                                                                                                                                                                                                                                                                                                                                                                |   |                    |                                   |            |                    |                                               |   |                    |                                     |   |                    |                                                   |   |                    |                      |    |                     |       |
| 5   | risk_addit_spec__5                                                           | More therapy options                                                                                                                                                                                                                                                             |                                                                                                                                                                                                                                                                                                                                                                                                                                                                                                                                                                                                |   |                    |                                   |            |                    |                                               |   |                    |                                     |   |                    |                                                   |   |                    |                      |    |                     |       |
| 88  | risk_addit_spec__88                                                          | Other                                                                                                                                                                                                                                                                            |                                                                                                                                                                                                                                                                                                                                                                                                                                                                                                                                                                                                |   |                    |                                   |            |                    |                                               |   |                    |                                     |   |                    |                                                   |   |                    |                      |    |                     |       |
| 380 | risk_addit_spec_88<br>Show the field ONLY if:<br>[risk_addit_spec(88)] = '1' | What other additional consultation?<br><i>Please specify.</i>                                                                                                                                                                                                                    | notes, Required                                                                                                                                                                                                                                                                                                                                                                                                                                                                                                                                                                                |   |                    |                                   |            |                    |                                               |   |                    |                                     |   |                    |                                                   |   |                    |                      |    |                     |       |
| 381 | risikomonitoring_complete                                                    | Section Header: <i>Form Status</i><br>Complete?                                                                                                                                                                                                                                  | dropdown<br><table border="1"> <tr><td>0</td><td>Incomplete</td></tr> <tr><td>1</td><td>Unverified</td></tr> <tr><td>2</td><td>Complete</td></tr> </table>                                                                                                                                                                                                                                                                                                                                                                                                                                     | 0 | Incomplete         | 1                                 | Unverified | 2                  | Complete                                      |   |                    |                                     |   |                    |                                                   |   |                    |                      |    |                     |       |
| 0   | Incomplete                                                                   |                                                                                                                                                                                                                                                                                  |                                                                                                                                                                                                                                                                                                                                                                                                                                                                                                                                                                                                |   |                    |                                   |            |                    |                                               |   |                    |                                     |   |                    |                                                   |   |                    |                      |    |                     |       |
| 1   | Unverified                                                                   |                                                                                                                                                                                                                                                                                  |                                                                                                                                                                                                                                                                                                                                                                                                                                                                                                                                                                                                |   |                    |                                   |            |                    |                                               |   |                    |                                     |   |                    |                                                   |   |                    |                      |    |                     |       |
| 2   | Complete                                                                     |                                                                                                                                                                                                                                                                                  |                                                                                                                                                                                                                                                                                                                                                                                                                                                                                                                                                                                                |   |                    |                                   |            |                    |                                               |   |                    |                                     |   |                    |                                                   |   |                    |                      |    |                     |       |

Instrument: **final questions** (schlussfragen) Enabled as survey

|     |                                                                                |                                                                                                                                                                                                                                                                                                                                                                                                                                 |                                                                                                                                                                                                                                                                                                                                                                                                                                                                                                                                                                                                                                                                                                                                      |   |                  |                                   |    |                  |                                               |   |                  |                                     |   |                  |                                                   |   |                  |                       |    |                   |                |   |                 |                |   |                 |                        |    |                  |       |
|-----|--------------------------------------------------------------------------------|---------------------------------------------------------------------------------------------------------------------------------------------------------------------------------------------------------------------------------------------------------------------------------------------------------------------------------------------------------------------------------------------------------------------------------|--------------------------------------------------------------------------------------------------------------------------------------------------------------------------------------------------------------------------------------------------------------------------------------------------------------------------------------------------------------------------------------------------------------------------------------------------------------------------------------------------------------------------------------------------------------------------------------------------------------------------------------------------------------------------------------------------------------------------------------|---|------------------|-----------------------------------|----|------------------|-----------------------------------------------|---|------------------|-------------------------------------|---|------------------|---------------------------------------------------|---|------------------|-----------------------|----|-------------------|----------------|---|-----------------|----------------|---|-----------------|------------------------|----|------------------|-------|
| 382 | sf_satisf_sc                                                                   | If you now consider all the areas in which you are affected by your PCOS as a whole:<br>Please rate your satisfaction in general with the overall advice regarding PCOS from your gynecologist?<br><i>Drag the blue slider and drop it at the desired position.</i>                                                                                                                                                             | slider (number), Required<br>Slider labels: 0, 50, 100<br>Custom alignment: RH                                                                                                                                                                                                                                                                                                                                                                                                                                                                                                                                                                                                                                                       |   |                  |                                   |    |                  |                                               |   |                  |                                     |   |                  |                                                   |   |                  |                       |    |                   |                |   |                 |                |   |                 |                        |    |                  |       |
| 383 | sf_addit_yn                                                                    | Would you like additional consultation overall?                                                                                                                                                                                                                                                                                                                                                                                 | radio, Required<br><table border="1"> <tr> <td>1</td> <td>Yes</td> </tr> <tr> <td>0</td> <td>No</td> </tr> </table>                                                                                                                                                                                                                                                                                                                                                                                                                                                                                                                                                                                                                  | 1 | Yes              | 0                                 | No |                  |                                               |   |                  |                                     |   |                  |                                                   |   |                  |                       |    |                   |                |   |                 |                |   |                 |                        |    |                  |       |
| 1   | Yes                                                                            |                                                                                                                                                                                                                                                                                                                                                                                                                                 |                                                                                                                                                                                                                                                                                                                                                                                                                                                                                                                                                                                                                                                                                                                                      |   |                  |                                   |    |                  |                                               |   |                  |                                     |   |                  |                                                   |   |                  |                       |    |                   |                |   |                 |                |   |                 |                        |    |                  |       |
| 0   | No                                                                             |                                                                                                                                                                                                                                                                                                                                                                                                                                 |                                                                                                                                                                                                                                                                                                                                                                                                                                                                                                                                                                                                                                                                                                                                      |   |                  |                                   |    |                  |                                               |   |                  |                                     |   |                  |                                                   |   |                  |                       |    |                   |                |   |                 |                |   |                 |                        |    |                  |       |
| 384 | sf_addit_spec<br>Show the field ONLY if: [sf_addit_yn] = '1'                   | Please select what you would wish to have in addition:                                                                                                                                                                                                                                                                                                                                                                          | checkbox, Required<br><table border="1"> <tr> <td>1</td> <td>sf_addit_spec__1</td> <td>More consultation and reassurance</td> </tr> <tr> <td>2</td> <td>sf_addit_spec__2</td> <td>More information providing (such as booklets)</td> </tr> <tr> <td>3</td> <td>sf_addit_spec__3</td> <td>More possibilities to ask questions</td> </tr> <tr> <td>4</td> <td>sf_addit_spec__4</td> <td>More examinations (blood tests, ultrasound, etc.)</td> </tr> <tr> <td>5</td> <td>sf_addit_spec__5</td> <td>More therapy options</td> </tr> <tr> <td>88</td> <td>sf_addit_spec__88</td> <td>Other</td> </tr> </table>                                                                                                                           | 1 | sf_addit_spec__1 | More consultation and reassurance | 2  | sf_addit_spec__2 | More information providing (such as booklets) | 3 | sf_addit_spec__3 | More possibilities to ask questions | 4 | sf_addit_spec__4 | More examinations (blood tests, ultrasound, etc.) | 5 | sf_addit_spec__5 | More therapy options  | 88 | sf_addit_spec__88 | Other          |   |                 |                |   |                 |                        |    |                  |       |
| 1   | sf_addit_spec__1                                                               | More consultation and reassurance                                                                                                                                                                                                                                                                                                                                                                                               |                                                                                                                                                                                                                                                                                                                                                                                                                                                                                                                                                                                                                                                                                                                                      |   |                  |                                   |    |                  |                                               |   |                  |                                     |   |                  |                                                   |   |                  |                       |    |                   |                |   |                 |                |   |                 |                        |    |                  |       |
| 2   | sf_addit_spec__2                                                               | More information providing (such as booklets)                                                                                                                                                                                                                                                                                                                                                                                   |                                                                                                                                                                                                                                                                                                                                                                                                                                                                                                                                                                                                                                                                                                                                      |   |                  |                                   |    |                  |                                               |   |                  |                                     |   |                  |                                                   |   |                  |                       |    |                   |                |   |                 |                |   |                 |                        |    |                  |       |
| 3   | sf_addit_spec__3                                                               | More possibilities to ask questions                                                                                                                                                                                                                                                                                                                                                                                             |                                                                                                                                                                                                                                                                                                                                                                                                                                                                                                                                                                                                                                                                                                                                      |   |                  |                                   |    |                  |                                               |   |                  |                                     |   |                  |                                                   |   |                  |                       |    |                   |                |   |                 |                |   |                 |                        |    |                  |       |
| 4   | sf_addit_spec__4                                                               | More examinations (blood tests, ultrasound, etc.)                                                                                                                                                                                                                                                                                                                                                                               |                                                                                                                                                                                                                                                                                                                                                                                                                                                                                                                                                                                                                                                                                                                                      |   |                  |                                   |    |                  |                                               |   |                  |                                     |   |                  |                                                   |   |                  |                       |    |                   |                |   |                 |                |   |                 |                        |    |                  |       |
| 5   | sf_addit_spec__5                                                               | More therapy options                                                                                                                                                                                                                                                                                                                                                                                                            |                                                                                                                                                                                                                                                                                                                                                                                                                                                                                                                                                                                                                                                                                                                                      |   |                  |                                   |    |                  |                                               |   |                  |                                     |   |                  |                                                   |   |                  |                       |    |                   |                |   |                 |                |   |                 |                        |    |                  |       |
| 88  | sf_addit_spec__88                                                              | Other                                                                                                                                                                                                                                                                                                                                                                                                                           |                                                                                                                                                                                                                                                                                                                                                                                                                                                                                                                                                                                                                                                                                                                                      |   |                  |                                   |    |                  |                                               |   |                  |                                     |   |                  |                                                   |   |                  |                       |    |                   |                |   |                 |                |   |                 |                        |    |                  |       |
| 385 | sf_addit_spec_88<br>Show the field ONLY if: [sf_addit_spec(88)] = '1'          | What other additional consultation?<br><i>Please specify.</i>                                                                                                                                                                                                                                                                                                                                                                   | notes, Required                                                                                                                                                                                                                                                                                                                                                                                                                                                                                                                                                                                                                                                                                                                      |   |                  |                                   |    |                  |                                               |   |                  |                                     |   |                  |                                                   |   |                  |                       |    |                   |                |   |                 |                |   |                 |                        |    |                  |       |
| 386 | sf_satisf_change_yn                                                            | Did this survey change anything about your satisfaction with your gynecologist?                                                                                                                                                                                                                                                                                                                                                 | radio, Required<br><table border="1"> <tr> <td>1</td> <td>Yes</td> </tr> <tr> <td>0</td> <td>No</td> </tr> </table>                                                                                                                                                                                                                                                                                                                                                                                                                                                                                                                                                                                                                  | 1 | Yes              | 0                                 | No |                  |                                               |   |                  |                                     |   |                  |                                                   |   |                  |                       |    |                   |                |   |                 |                |   |                 |                        |    |                  |       |
| 1   | Yes                                                                            |                                                                                                                                                                                                                                                                                                                                                                                                                                 |                                                                                                                                                                                                                                                                                                                                                                                                                                                                                                                                                                                                                                                                                                                                      |   |                  |                                   |    |                  |                                               |   |                  |                                     |   |                  |                                                   |   |                  |                       |    |                   |                |   |                 |                |   |                 |                        |    |                  |       |
| 0   | No                                                                             |                                                                                                                                                                                                                                                                                                                                                                                                                                 |                                                                                                                                                                                                                                                                                                                                                                                                                                                                                                                                                                                                                                                                                                                                      |   |                  |                                   |    |                  |                                               |   |                  |                                     |   |                  |                                                   |   |                  |                       |    |                   |                |   |                 |                |   |                 |                        |    |                  |       |
| 387 | sf_satisf_change_before<br>Show the field ONLY if: [sf_satisf_change_yn] = '1' | Please rate your satisfaction before the survey.<br><i>Drag the blue slider and drop it at the desired position.</i>                                                                                                                                                                                                                                                                                                            | slider (number), Required<br>Slider labels: 0, 50, 100<br>Custom alignment: RH                                                                                                                                                                                                                                                                                                                                                                                                                                                                                                                                                                                                                                                       |   |                  |                                   |    |                  |                                               |   |                  |                                     |   |                  |                                                   |   |                  |                       |    |                   |                |   |                 |                |   |                 |                        |    |                  |       |
| 388 | sf_satisf_change_spec<br>Show the field ONLY if: [sf_satisf_change_yn] = '1'   | To what extent has the survey changed your opinion?<br><i>Please specify.</i>                                                                                                                                                                                                                                                                                                                                                   | notes, Required<br>Custom alignment: RH                                                                                                                                                                                                                                                                                                                                                                                                                                                                                                                                                                                                                                                                                              |   |                  |                                   |    |                  |                                               |   |                  |                                     |   |                  |                                                   |   |                  |                       |    |                   |                |   |                 |                |   |                 |                        |    |                  |       |
| 389 | sf_satisf_change_info<br>Show the field ONLY if: [sf_satisf_change_yn] = '1'   | We would like to point out that this survey covers all possible points of care according to the new guidelines. If your gynecologist does not do everything the same way, this does not mean that he/she does it badly.<br>If you have any uncertainties or feel you are receiving bad care after this survey, please contact your gynecologist and discuss the situation with her/him. There is certainly a solution for this. | descriptive                                                                                                                                                                                                                                                                                                                                                                                                                                                                                                                                                                                                                                                                                                                          |   |                  |                                   |    |                  |                                               |   |                  |                                     |   |                  |                                                   |   |                  |                       |    |                   |                |   |                 |                |   |                 |                        |    |                  |       |
| 390 | sf_zus_yn                                                                      | Was there a question missing from this survey that you felt was important?                                                                                                                                                                                                                                                                                                                                                      | radio, Required<br><table border="1"> <tr> <td>1</td> <td>Yes</td> </tr> <tr> <td>0</td> <td>No</td> </tr> </table>                                                                                                                                                                                                                                                                                                                                                                                                                                                                                                                                                                                                                  | 1 | Yes              | 0                                 | No |                  |                                               |   |                  |                                     |   |                  |                                                   |   |                  |                       |    |                   |                |   |                 |                |   |                 |                        |    |                  |       |
| 1   | Yes                                                                            |                                                                                                                                                                                                                                                                                                                                                                                                                                 |                                                                                                                                                                                                                                                                                                                                                                                                                                                                                                                                                                                                                                                                                                                                      |   |                  |                                   |    |                  |                                               |   |                  |                                     |   |                  |                                                   |   |                  |                       |    |                   |                |   |                 |                |   |                 |                        |    |                  |       |
| 0   | No                                                                             |                                                                                                                                                                                                                                                                                                                                                                                                                                 |                                                                                                                                                                                                                                                                                                                                                                                                                                                                                                                                                                                                                                                                                                                                      |   |                  |                                   |    |                  |                                               |   |                  |                                     |   |                  |                                                   |   |                  |                       |    |                   |                |   |                 |                |   |                 |                        |    |                  |       |
| 391 | sf_zus_spec<br>Show the field ONLY if: [sf_zus_yn] = '1'                       | Please write down the missing question(s):                                                                                                                                                                                                                                                                                                                                                                                      | notes, Required<br>Custom alignment: RH                                                                                                                                                                                                                                                                                                                                                                                                                                                                                                                                                                                                                                                                                              |   |                  |                                   |    |                  |                                               |   |                  |                                     |   |                  |                                                   |   |                  |                       |    |                   |                |   |                 |                |   |                 |                        |    |                  |       |
| 392 | sf_note_yn                                                                     | Is there anything else you would like to say?                                                                                                                                                                                                                                                                                                                                                                                   | radio, Required<br><table border="1"> <tr> <td>1</td> <td>Yes</td> </tr> <tr> <td>0</td> <td>No</td> </tr> </table>                                                                                                                                                                                                                                                                                                                                                                                                                                                                                                                                                                                                                  | 1 | Yes              | 0                                 | No |                  |                                               |   |                  |                                     |   |                  |                                                   |   |                  |                       |    |                   |                |   |                 |                |   |                 |                        |    |                  |       |
| 1   | Yes                                                                            |                                                                                                                                                                                                                                                                                                                                                                                                                                 |                                                                                                                                                                                                                                                                                                                                                                                                                                                                                                                                                                                                                                                                                                                                      |   |                  |                                   |    |                  |                                               |   |                  |                                     |   |                  |                                                   |   |                  |                       |    |                   |                |   |                 |                |   |                 |                        |    |                  |       |
| 0   | No                                                                             |                                                                                                                                                                                                                                                                                                                                                                                                                                 |                                                                                                                                                                                                                                                                                                                                                                                                                                                                                                                                                                                                                                                                                                                                      |   |                  |                                   |    |                  |                                               |   |                  |                                     |   |                  |                                                   |   |                  |                       |    |                   |                |   |                 |                |   |                 |                        |    |                  |       |
| 393 | sf_note_spec<br>Show the field ONLY if: [sf_note_yn] = '1'                     | Comment:                                                                                                                                                                                                                                                                                                                                                                                                                        | notes, Required<br>Custom alignment: RH                                                                                                                                                                                                                                                                                                                                                                                                                                                                                                                                                                                                                                                                                              |   |                  |                                   |    |                  |                                               |   |                  |                                     |   |                  |                                                   |   |                  |                       |    |                   |                |   |                 |                |   |                 |                        |    |                  |       |
| 394 | sf_recr_spec                                                                   | How did you come across this survey?                                                                                                                                                                                                                                                                                                                                                                                            | checkbox, Required<br><table border="1"> <tr> <td>1</td> <td>sf_recr_spec__1</td> <td>resident gynecologist</td> </tr> <tr> <td>2</td> <td>sf_recr_spec__2</td> <td>hospital gynecologist</td> </tr> <tr> <td>3</td> <td>sf_recr_spec__3</td> <td>Poster / Flyer</td> </tr> <tr> <td>4</td> <td>sf_recr_spec__4</td> <td>Social Media</td> </tr> <tr> <td>5</td> <td>sf_recr_spec__5</td> <td>University newsletter</td> </tr> <tr> <td>6</td> <td>sf_recr_spec__6</td> <td>Internet forum</td> </tr> <tr> <td>7</td> <td>sf_recr_spec__7</td> <td>Selfhelp group</td> </tr> <tr> <td>8</td> <td>sf_recr_spec__8</td> <td>Friends / Acquaintance</td> </tr> <tr> <td>88</td> <td>sf_recr_spec__88</td> <td>other</td> </tr> </table> | 1 | sf_recr_spec__1  | resident gynecologist             | 2  | sf_recr_spec__2  | hospital gynecologist                         | 3 | sf_recr_spec__3  | Poster / Flyer                      | 4 | sf_recr_spec__4  | Social Media                                      | 5 | sf_recr_spec__5  | University newsletter | 6  | sf_recr_spec__6   | Internet forum | 7 | sf_recr_spec__7 | Selfhelp group | 8 | sf_recr_spec__8 | Friends / Acquaintance | 88 | sf_recr_spec__88 | other |
| 1   | sf_recr_spec__1                                                                | resident gynecologist                                                                                                                                                                                                                                                                                                                                                                                                           |                                                                                                                                                                                                                                                                                                                                                                                                                                                                                                                                                                                                                                                                                                                                      |   |                  |                                   |    |                  |                                               |   |                  |                                     |   |                  |                                                   |   |                  |                       |    |                   |                |   |                 |                |   |                 |                        |    |                  |       |
| 2   | sf_recr_spec__2                                                                | hospital gynecologist                                                                                                                                                                                                                                                                                                                                                                                                           |                                                                                                                                                                                                                                                                                                                                                                                                                                                                                                                                                                                                                                                                                                                                      |   |                  |                                   |    |                  |                                               |   |                  |                                     |   |                  |                                                   |   |                  |                       |    |                   |                |   |                 |                |   |                 |                        |    |                  |       |
| 3   | sf_recr_spec__3                                                                | Poster / Flyer                                                                                                                                                                                                                                                                                                                                                                                                                  |                                                                                                                                                                                                                                                                                                                                                                                                                                                                                                                                                                                                                                                                                                                                      |   |                  |                                   |    |                  |                                               |   |                  |                                     |   |                  |                                                   |   |                  |                       |    |                   |                |   |                 |                |   |                 |                        |    |                  |       |
| 4   | sf_recr_spec__4                                                                | Social Media                                                                                                                                                                                                                                                                                                                                                                                                                    |                                                                                                                                                                                                                                                                                                                                                                                                                                                                                                                                                                                                                                                                                                                                      |   |                  |                                   |    |                  |                                               |   |                  |                                     |   |                  |                                                   |   |                  |                       |    |                   |                |   |                 |                |   |                 |                        |    |                  |       |
| 5   | sf_recr_spec__5                                                                | University newsletter                                                                                                                                                                                                                                                                                                                                                                                                           |                                                                                                                                                                                                                                                                                                                                                                                                                                                                                                                                                                                                                                                                                                                                      |   |                  |                                   |    |                  |                                               |   |                  |                                     |   |                  |                                                   |   |                  |                       |    |                   |                |   |                 |                |   |                 |                        |    |                  |       |
| 6   | sf_recr_spec__6                                                                | Internet forum                                                                                                                                                                                                                                                                                                                                                                                                                  |                                                                                                                                                                                                                                                                                                                                                                                                                                                                                                                                                                                                                                                                                                                                      |   |                  |                                   |    |                  |                                               |   |                  |                                     |   |                  |                                                   |   |                  |                       |    |                   |                |   |                 |                |   |                 |                        |    |                  |       |
| 7   | sf_recr_spec__7                                                                | Selfhelp group                                                                                                                                                                                                                                                                                                                                                                                                                  |                                                                                                                                                                                                                                                                                                                                                                                                                                                                                                                                                                                                                                                                                                                                      |   |                  |                                   |    |                  |                                               |   |                  |                                     |   |                  |                                                   |   |                  |                       |    |                   |                |   |                 |                |   |                 |                        |    |                  |       |
| 8   | sf_recr_spec__8                                                                | Friends / Acquaintance                                                                                                                                                                                                                                                                                                                                                                                                          |                                                                                                                                                                                                                                                                                                                                                                                                                                                                                                                                                                                                                                                                                                                                      |   |                  |                                   |    |                  |                                               |   |                  |                                     |   |                  |                                                   |   |                  |                       |    |                   |                |   |                 |                |   |                 |                        |    |                  |       |
| 88  | sf_recr_spec__88                                                               | other                                                                                                                                                                                                                                                                                                                                                                                                                           |                                                                                                                                                                                                                                                                                                                                                                                                                                                                                                                                                                                                                                                                                                                                      |   |                  |                                   |    |                  |                                               |   |                  |                                     |   |                  |                                                   |   |                  |                       |    |                   |                |   |                 |                |   |                 |                        |    |                  |       |



|     |                                                                          |                                                            |                                                                                                                                                                                                                                                                                                                           |   |                  |          |            |                  |           |   |                  |          |    |                   |       |
|-----|--------------------------------------------------------------------------|------------------------------------------------------------|---------------------------------------------------------------------------------------------------------------------------------------------------------------------------------------------------------------------------------------------------------------------------------------------------------------------------|---|------------------|----------|------------|------------------|-----------|---|------------------|----------|----|-------------------|-------|
| 395 | sf_recr_spec_88<br>Show the field ONLY if:<br>[sf_recr_spec(88)] = '1'   | What other possibility?<br><i>Please specify.</i>          | notes, Required                                                                                                                                                                                                                                                                                                           |   |                  |          |            |                  |           |   |                  |          |    |                   |       |
| 396 | sf_recr_spec4<br>Show the field ONLY if:<br>[sf_recr_spec(4)] = '1'      | Through which social media channel?                        | checkbox, Required<br><table border="1"> <tr> <td>1</td> <td>sf_recr_spec4__1</td> <td>Facebook</td> </tr> <tr> <td>2</td> <td>sf_recr_spec4__2</td> <td>Instagram</td> </tr> <tr> <td>3</td> <td>sf_recr_spec4__3</td> <td>LinkedIn</td> </tr> <tr> <td>88</td> <td>sf_recr_spec4__88</td> <td>other</td> </tr> </table> | 1 | sf_recr_spec4__1 | Facebook | 2          | sf_recr_spec4__2 | Instagram | 3 | sf_recr_spec4__3 | LinkedIn | 88 | sf_recr_spec4__88 | other |
| 1   | sf_recr_spec4__1                                                         | Facebook                                                   |                                                                                                                                                                                                                                                                                                                           |   |                  |          |            |                  |           |   |                  |          |    |                   |       |
| 2   | sf_recr_spec4__2                                                         | Instagram                                                  |                                                                                                                                                                                                                                                                                                                           |   |                  |          |            |                  |           |   |                  |          |    |                   |       |
| 3   | sf_recr_spec4__3                                                         | LinkedIn                                                   |                                                                                                                                                                                                                                                                                                                           |   |                  |          |            |                  |           |   |                  |          |    |                   |       |
| 88  | sf_recr_spec4__88                                                        | other                                                      |                                                                                                                                                                                                                                                                                                                           |   |                  |          |            |                  |           |   |                  |          |    |                   |       |
| 397 | sf_recr_spec4_88<br>Show the field ONLY if:<br>[sf_recr_spec4(88)] = '1' | What other social media channel?<br><i>Please specify.</i> | notes, Required                                                                                                                                                                                                                                                                                                           |   |                  |          |            |                  |           |   |                  |          |    |                   |       |
| 398 | schlussfragen_complete                                                   | Section Header: <i>Form Status</i><br>Complete?            | dropdown<br><table border="1"> <tr> <td>0</td> <td>Incomplete</td> </tr> <tr> <td>1</td> <td>Unverified</td> </tr> <tr> <td>2</td> <td>Complete</td> </tr> </table>                                                                                                                                                       | 0 | Incomplete       | 1        | Unverified | 2                | Complete  |   |                  |          |    |                   |       |
| 0   | Incomplete                                                               |                                                            |                                                                                                                                                                                                                                                                                                                           |   |                  |          |            |                  |           |   |                  |          |    |                   |       |
| 1   | Unverified                                                               |                                                            |                                                                                                                                                                                                                                                                                                                           |   |                  |          |            |                  |           |   |                  |          |    |                   |       |
| 2   | Complete                                                                 |                                                            |                                                                                                                                                                                                                                                                                                                           |   |                  |          |            |                  |           |   |                  |          |    |                   |       |
