# Supplementary material for: Unmet clinical needs in women with polycystic ovary syndrome in regard to mental health: a cross-sectional study
Source: Arch Gynecol Obstet. 2024 Mar 11;309(5):2115–26. doi: 10.1007/s00404-024-07452-y (PMC11018694; doi:10.1007/s00404-024-07452-y)
Supplement: Supplementary file 3 — Supplementary file3 (PDF 703 KB) [file 404_2024_7452_MOESM3_ESM.pdf]

1    **Archives of Women's Mental Health**

2    **Unmet clinical needs in women with polycystic ovary syndrome in regard to mental health**  
3    **– a cross-sectional study**

4    Sourouni Marina, M. D, Estermann Julia, M. D., Bitterlich Norman, Ph. D, Weidlinger Susanna,  
5    M. D., Bachmann Annette, M. D., Stute Petra, M.D.

6

7    Corresponding author:

8    Professor Dr. med. Petra Stute, M. D.

9    Department of Obstetrics and Gynaecology

10    University Hospital Inselspital

11    Friedbuehlstrasse 19, 3010 Bern, Switzerland

12    E-mail: [petra.stute@insel.ch](mailto:petra.stute@insel.ch)

13    Telephone: (00)41-31-632-1303

14    Fax: (00)41-31-632-1305

15    ORCID:0000-0002-5591-1552

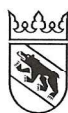

Gesundheits-, Sozial- und Integrationsdirektion  
Kantonale Ethikkommission für die Forschung

Murtenstrasse 31  
3010 Bern  
Bern  
+41 31 633 70 70 (Telefon)  
+41 31 633 70 71 (Telefax)  
info.kek.kapa@be.ch  
www.be.ch/gsi

Dorothy Pfiffner  
+41 31 633 70 77  
dorothy.pfiffner@be.ch

GSI-KEK, Murtenstrasse 31, 3010 Bern

Julia Estermann  
Muriweid 4  
6207 Nottwil

## Zuständigkeitsabklärung

**BASEC-Nr:** Req-2020-00801

**Eingangsdatum:** 02/07/2020

**Titel:** Versorgungssituation und -bedarf bei Frauen mit PCOS

### Ergebnis der Zuständigkeitsabklärung

- ☒ **Nicht zuständig**, d.h. das Vorhaben ist nicht bewilligungspflichtig  
Begründung: Das Vorhaben fällt nicht unter das Humanforschungsgesetz, Art. 2, Abs. 1
- ☐ **Zuständig:** Bewilligung gemäss Humanforschungsgesetz, Art. 2, Abs. 1 **notwendig**.  
Bitte reichen Sie der KEK ein Gesuch gemäss [www.swissethics.ch](http://www.swissethics.ch) ein

**Gebühren:** CHF 200.-- (Tarifcode 6.0)  
Rechnung folgt

Datum/Ort: 08.07.2020/Bern

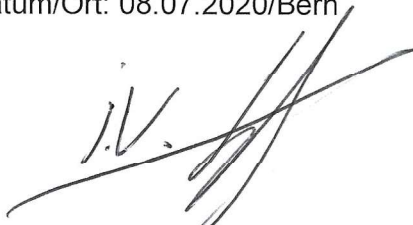  
Prof. Dr. med. Christian Seiler  
Präsident

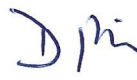  
Dr. sc. nat. Dorothy Pfiffner  
Leiterin wissenschaftliches Sekretariat

**IM HAUSE**

Klinik für Frauenheilkunde und Geburtshilfe  
Endokrinologie und Reproduktionsmedizin  
Frau Dr. Annette Bachmann

KFG

**Titel: Versorgungssituation und –bedarf bei Frauen mit PCOS**

Sehr geehrte Frau Dr. Bachmann,

vielen Dank für die Zusendung der Studienunterlagen vom 23.11.2020.

Für die o.g. anonymisierte Datenerhebung besteht keine Pflicht zur  
berufsrechtlichen Beratung durch die Ethikkommission des Fachbereiches  
Medizin der Goethe Universität.

Mit freundlichen Grüßen

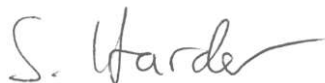

Prof. Dr. med. Sebastian Harder  
Vorsitzender der Ethik-Kommission

**Vorgelegte Unterlagen:**

- Fragenkatalog Version 5

**Ethik-Kommission**

**Vorsitz:**

**Prof. Dr. Sebastian Harder**

**Geschäftsführung:**

**Dr. Johannes Hätscher**

**Bearbeitung des Vorgangs:**

Klinge

Dienstag, 08. Dezember 2020

**Geschäftsstelle**

**Sekretariat:**

Ruth Schmidt  
Tel.: 069 / 6301-3758  
Fax: 069 / 6301-83434  
E-Mail: [ethikkommission@kgu.de](mailto:ethikkommission@kgu.de)

**Mitarbeiter/innen:**

Durchwahl  
Dorothea Bittner Tel.: 3889  
Angela Heuser Tel.: 4552  
Ina Klinge Tel.: 3884  
Dr. Marnie Kopp Tel.: 3884  
Myriam Freund Tel.: 7239  
Fax: 83434  
E-Mail: [ethikkommission@kgu.de](mailto:ethikkommission@kgu.de)

<http://www.kgu.de/ueber-uns/vorstand-des-universitaetsklinikums/dekan/home/>

**Lieferadresse:**

Ethik-Kommission des  
Fachbereichs Medizin  
der Goethe-Universität  
c/o Universitätsklinikum  
Theodor-Stern-Kai 7  
Haus 1, 2. OG, Zi. 207  
60590 Frankfurt am Main

**Öffnungszeiten f. Anlieferungen:**

Montag bis Donnerstag:  
09:00 bis 15:30 Uhr  
Freitag:  
09:00 bis 12:30 Uhr
